# Supplementary material for: Acoustic streaming in the transducer plane in ultrasonic particle manipulation devices
Source: Royal Society of Chemistry journal article supplement (doi:10.1039/c3lc00010a), 2013-01-01
Supplement: c3lc00010a.mht [file c3lc00010a.mht]

MIME-Version: 1.0
Content-Type: multipart/related; boundary="----=_NextPart_01CE1BE7.248BF370"

This document is a Single File Web Page, also known as a Web Archive file.  If you are seeing this message, your browser or editor doesn't support Web Archive files.  Please download a browser that supports Web Archive, such as Windows� Internet Explorer�.

------=_NextPart_01CE1BE7.248BF370
Content-Location: file:///C:/1E4BB24E/Streamingsimulation.htm
Content-Transfer-Encoding: quoted-printable
Content-Type: text/html; charset="windows-1252"

<html xmlns:v=3D"urn:schemas-microsoft-com:vml"
xmlns:o=3D"urn:schemas-microsoft-com:office:office"
xmlns:w=3D"urn:schemas-microsoft-com:office:word"
xmlns:m=3D"http://schemas.microsoft.com/office/2004/12/omml"
xmlns=3D"http://www.w3.org/TR/REC-html40">

<head>
<meta http-equiv=3DContent-Type content=3D"text/html; charset=3Dwindows-125=
2">
<meta name=3DProgId content=3DWord.Document>
<meta name=3DGenerator content=3D"Microsoft Word 14">
<meta name=3DOriginator content=3D"Microsoft Word 14">
<link rel=3DFile-List href=3D"Streamingsimulation_files/filelist.xml">
<link rel=3DEdit-Time-Data href=3D"Streamingsimulation_files/editdata.mso">
<!--[if !mso]>
<style>
v\:* {behavior:url(#default#VML);}
o\:* {behavior:url(#default#VML);}
w\:* {behavior:url(#default#VML);}
.shape {behavior:url(#default#VML);}
</style>
<![endif]--><!--[if gte mso 9]><xml>
 <o:DocumentProperties>
  <o:Author>Hill M.</o:Author>
  <o:LastAuthor>Hill M.</o:LastAuthor>
  <o:Revision>2</o:Revision>
  <o:TotalTime>2</o:TotalTime>
  <o:Created>2013-03-08T10:22:00Z</o:Created>
  <o:LastSaved>2013-03-08T10:24:00Z</o:LastSaved>
  <o:Pages>1</o:Pages>
  <o:Characters>2</o:Characters>
  <o:Company>University of Southampton</o:Company>
  <o:Lines>1</o:Lines>
  <o:Paragraphs>1</o:Paragraphs>
  <o:CharactersWithSpaces>2</o:CharactersWithSpaces>
  <o:Version>14.00</o:Version>
 </o:DocumentProperties>
 <o:OfficeDocumentSettings>
  <o:AllowPNG/>
 </o:OfficeDocumentSettings>
</xml><![endif]-->
<link rel=3DthemeData href=3D"Streamingsimulation_files/themedata.thmx">
<link rel=3DcolorSchemeMapping
href=3D"Streamingsimulation_files/colorschememapping.xml">
<!--[if gte mso 9]><xml>
 <w:WordDocument>
  <w:SpellingState>Clean</w:SpellingState>
  <w:GrammarState>Clean</w:GrammarState>
  <w:TrackMoves>false</w:TrackMoves>
  <w:TrackFormatting/>
  <w:PunctuationKerning/>
  <w:ValidateAgainstSchemas/>
  <w:SaveIfXMLInvalid>false</w:SaveIfXMLInvalid>
  <w:IgnoreMixedContent>false</w:IgnoreMixedContent>
  <w:AlwaysShowPlaceholderText>false</w:AlwaysShowPlaceholderText>
  <w:DoNotPromoteQF/>
  <w:LidThemeOther>EN-GB</w:LidThemeOther>
  <w:LidThemeAsian>ZH-CN</w:LidThemeAsian>
  <w:LidThemeComplexScript>AR-SA</w:LidThemeComplexScript>
  <w:Compatibility>
   <w:BreakWrappedTables/>
   <w:SnapToGridInCell/>
   <w:WrapTextWithPunct/>
   <w:UseAsianBreakRules/>
   <w:DontGrowAutofit/>
   <w:SplitPgBreakAndParaMark/>
   <w:EnableOpenTypeKerning/>
   <w:DontFlipMirrorIndents/>
   <w:OverrideTableStyleHps/>
   <w:UseFELayout/>
  </w:Compatibility>
  <m:mathPr>
   <m:mathFont m:val=3D"Cambria Math"/>
   <m:brkBin m:val=3D"before"/>
   <m:brkBinSub m:val=3D"&#45;-"/>
   <m:smallFrac m:val=3D"off"/>
   <m:dispDef/>
   <m:lMargin m:val=3D"0"/>
   <m:rMargin m:val=3D"0"/>
   <m:defJc m:val=3D"centerGroup"/>
   <m:wrapIndent m:val=3D"1440"/>
   <m:intLim m:val=3D"subSup"/>
   <m:naryLim m:val=3D"undOvr"/>
  </m:mathPr></w:WordDocument>
</xml><![endif]--><!--[if gte mso 9]><xml>
 <w:LatentStyles DefLockedState=3D"false" DefUnhideWhenUsed=3D"true"
  DefSemiHidden=3D"true" DefQFormat=3D"false" DefPriority=3D"99"
  LatentStyleCount=3D"267">
  <w:LsdException Locked=3D"false" Priority=3D"0" SemiHidden=3D"false"
   UnhideWhenUsed=3D"false" QFormat=3D"true" Name=3D"Normal"/>
  <w:LsdException Locked=3D"false" Priority=3D"9" SemiHidden=3D"false"
   UnhideWhenUsed=3D"false" QFormat=3D"true" Name=3D"heading 1"/>
  <w:LsdException Locked=3D"false" Priority=3D"9" QFormat=3D"true" Name=3D"=
heading 2"/>
  <w:LsdException Locked=3D"false" Priority=3D"9" QFormat=3D"true" Name=3D"=
heading 3"/>
  <w:LsdException Locked=3D"false" Priority=3D"9" QFormat=3D"true" Name=3D"=
heading 4"/>
  <w:LsdException Locked=3D"false" Priority=3D"9" QFormat=3D"true" Name=3D"=
heading 5"/>
  <w:LsdException Locked=3D"false" Priority=3D"9" QFormat=3D"true" Name=3D"=
heading 6"/>
  <w:LsdException Locked=3D"false" Priority=3D"9" QFormat=3D"true" Name=3D"=
heading 7"/>
  <w:LsdException Locked=3D"false" Priority=3D"9" QFormat=3D"true" Name=3D"=
heading 8"/>
  <w:LsdException Locked=3D"false" Priority=3D"9" QFormat=3D"true" Name=3D"=
heading 9"/>
  <w:LsdException Locked=3D"false" Priority=3D"39" Name=3D"toc 1"/>
  <w:LsdException Locked=3D"false" Priority=3D"39" Name=3D"toc 2"/>
  <w:LsdException Locked=3D"false" Priority=3D"39" Name=3D"toc 3"/>
  <w:LsdException Locked=3D"false" Priority=3D"39" Name=3D"toc 4"/>
  <w:LsdException Locked=3D"false" Priority=3D"39" Name=3D"toc 5"/>
  <w:LsdException Locked=3D"false" Priority=3D"39" Name=3D"toc 6"/>
  <w:LsdException Locked=3D"false" Priority=3D"39" Name=3D"toc 7"/>
  <w:LsdException Locked=3D"false" Priority=3D"39" Name=3D"toc 8"/>
  <w:LsdException Locked=3D"false" Priority=3D"39" Name=3D"toc 9"/>
  <w:LsdException Locked=3D"false" Priority=3D"35" QFormat=3D"true" Name=3D=
"caption"/>
  <w:LsdException Locked=3D"false" Priority=3D"10" SemiHidden=3D"false"
   UnhideWhenUsed=3D"false" QFormat=3D"true" Name=3D"Title"/>
  <w:LsdException Locked=3D"false" Priority=3D"1" Name=3D"Default Paragraph=
 Font"/>
  <w:LsdException Locked=3D"false" Priority=3D"11" SemiHidden=3D"false"
   UnhideWhenUsed=3D"false" QFormat=3D"true" Name=3D"Subtitle"/>
  <w:LsdException Locked=3D"false" Priority=3D"22" SemiHidden=3D"false"
   UnhideWhenUsed=3D"false" QFormat=3D"true" Name=3D"Strong"/>
  <w:LsdException Locked=3D"false" Priority=3D"20" SemiHidden=3D"false"
   UnhideWhenUsed=3D"false" QFormat=3D"true" Name=3D"Emphasis"/>
  <w:LsdException Locked=3D"false" Priority=3D"59" SemiHidden=3D"false"
   UnhideWhenUsed=3D"false" Name=3D"Table Grid"/>
  <w:LsdException Locked=3D"false" UnhideWhenUsed=3D"false" Name=3D"Placeho=
lder Text"/>
  <w:LsdException Locked=3D"false" Priority=3D"1" SemiHidden=3D"false"
   UnhideWhenUsed=3D"false" QFormat=3D"true" Name=3D"No Spacing"/>
  <w:LsdException Locked=3D"false" Priority=3D"60" SemiHidden=3D"false"
   UnhideWhenUsed=3D"false" Name=3D"Light Shading"/>
  <w:LsdException Locked=3D"false" Priority=3D"61" SemiHidden=3D"false"
   UnhideWhenUsed=3D"false" Name=3D"Light List"/>
  <w:LsdException Locked=3D"false" Priority=3D"62" SemiHidden=3D"false"
   UnhideWhenUsed=3D"false" Name=3D"Light Grid"/>
  <w:LsdException Locked=3D"false" Priority=3D"63" SemiHidden=3D"false"
   UnhideWhenUsed=3D"false" Name=3D"Medium Shading 1"/>
  <w:LsdException Locked=3D"false" Priority=3D"64" SemiHidden=3D"false"
   UnhideWhenUsed=3D"false" Name=3D"Medium Shading 2"/>
  <w:LsdException Locked=3D"false" Priority=3D"65" SemiHidden=3D"false"
   UnhideWhenUsed=3D"false" Name=3D"Medium List 1"/>
  <w:LsdException Locked=3D"false" Priority=3D"66" SemiHidden=3D"false"
   UnhideWhenUsed=3D"false" Name=3D"Medium List 2"/>
  <w:LsdException Locked=3D"false" Priority=3D"67" SemiHidden=3D"false"
   UnhideWhenUsed=3D"false" Name=3D"Medium Grid 1"/>
  <w:LsdException Locked=3D"false" Priority=3D"68" SemiHidden=3D"false"
   UnhideWhenUsed=3D"false" Name=3D"Medium Grid 2"/>
  <w:LsdException Locked=3D"false" Priority=3D"69" SemiHidden=3D"false"
   UnhideWhenUsed=3D"false" Name=3D"Medium Grid 3"/>
  <w:LsdException Locked=3D"false" Priority=3D"70" SemiHidden=3D"false"
   UnhideWhenUsed=3D"false" Name=3D"Dark List"/>
  <w:LsdException Locked=3D"false" Priority=3D"71" SemiHidden=3D"false"
   UnhideWhenUsed=3D"false" Name=3D"Colorful Shading"/>
  <w:LsdException Locked=3D"false" Priority=3D"72" SemiHidden=3D"false"
   UnhideWhenUsed=3D"false" Name=3D"Colorful List"/>
  <w:LsdException Locked=3D"false" Priority=3D"73" SemiHidden=3D"false"
   UnhideWhenUsed=3D"false" Name=3D"Colorful Grid"/>
  <w:LsdException Locked=3D"false" Priority=3D"60" SemiHidden=3D"false"
   UnhideWhenUsed=3D"false" Name=3D"Light Shading Accent 1"/>
  <w:LsdException Locked=3D"false" Priority=3D"61" SemiHidden=3D"false"
   UnhideWhenUsed=3D"false" Name=3D"Light List Accent 1"/>
  <w:LsdException Locked=3D"false" Priority=3D"62" SemiHidden=3D"false"
   UnhideWhenUsed=3D"false" Name=3D"Light Grid Accent 1"/>
  <w:LsdException Locked=3D"false" Priority=3D"63" SemiHidden=3D"false"
   UnhideWhenUsed=3D"false" Name=3D"Medium Shading 1 Accent 1"/>
  <w:LsdException Locked=3D"false" Priority=3D"64" SemiHidden=3D"false"
   UnhideWhenUsed=3D"false" Name=3D"Medium Shading 2 Accent 1"/>
  <w:LsdException Locked=3D"false" Priority=3D"65" SemiHidden=3D"false"
   UnhideWhenUsed=3D"false" Name=3D"Medium List 1 Accent 1"/>
  <w:LsdException Locked=3D"false" UnhideWhenUsed=3D"false" Name=3D"Revisio=
n"/>
  <w:LsdException Locked=3D"false" Priority=3D"34" SemiHidden=3D"false"
   UnhideWhenUsed=3D"false" QFormat=3D"true" Name=3D"List Paragraph"/>
  <w:LsdException Locked=3D"false" Priority=3D"29" SemiHidden=3D"false"
   UnhideWhenUsed=3D"false" QFormat=3D"true" Name=3D"Quote"/>
  <w:LsdException Locked=3D"false" Priority=3D"30" SemiHidden=3D"false"
   UnhideWhenUsed=3D"false" QFormat=3D"true" Name=3D"Intense Quote"/>
  <w:LsdException Locked=3D"false" Priority=3D"66" SemiHidden=3D"false"
   UnhideWhenUsed=3D"false" Name=3D"Medium List 2 Accent 1"/>
  <w:LsdException Locked=3D"false" Priority=3D"67" SemiHidden=3D"false"
   UnhideWhenUsed=3D"false" Name=3D"Medium Grid 1 Accent 1"/>
  <w:LsdException Locked=3D"false" Priority=3D"68" SemiHidden=3D"false"
   UnhideWhenUsed=3D"false" Name=3D"Medium Grid 2 Accent 1"/>
  <w:LsdException Locked=3D"false" Priority=3D"69" SemiHidden=3D"false"
   UnhideWhenUsed=3D"false" Name=3D"Medium Grid 3 Accent 1"/>
  <w:LsdException Locked=3D"false" Priority=3D"70" SemiHidden=3D"false"
   UnhideWhenUsed=3D"false" Name=3D"Dark List Accent 1"/>
  <w:LsdException Locked=3D"false" Priority=3D"71" SemiHidden=3D"false"
   UnhideWhenUsed=3D"false" Name=3D"Colorful Shading Accent 1"/>
  <w:LsdException Locked=3D"false" Priority=3D"72" SemiHidden=3D"false"
   UnhideWhenUsed=3D"false" Name=3D"Colorful List Accent 1"/>
  <w:LsdException Locked=3D"false" Priority=3D"73" SemiHidden=3D"false"
   UnhideWhenUsed=3D"false" Name=3D"Colorful Grid Accent 1"/>
  <w:LsdException Locked=3D"false" Priority=3D"60" SemiHidden=3D"false"
   UnhideWhenUsed=3D"false" Name=3D"Light Shading Accent 2"/>
  <w:LsdException Locked=3D"false" Priority=3D"61" SemiHidden=3D"false"
   UnhideWhenUsed=3D"false" Name=3D"Light List Accent 2"/>
  <w:LsdException Locked=3D"false" Priority=3D"62" SemiHidden=3D"false"
   UnhideWhenUsed=3D"false" Name=3D"Light Grid Accent 2"/>
  <w:LsdException Locked=3D"false" Priority=3D"63" SemiHidden=3D"false"
   UnhideWhenUsed=3D"false" Name=3D"Medium Shading 1 Accent 2"/>
  <w:LsdException Locked=3D"false" Priority=3D"64" SemiHidden=3D"false"
   UnhideWhenUsed=3D"false" Name=3D"Medium Shading 2 Accent 2"/>
  <w:LsdException Locked=3D"false" Priority=3D"65" SemiHidden=3D"false"
   UnhideWhenUsed=3D"false" Name=3D"Medium List 1 Accent 2"/>
  <w:LsdException Locked=3D"false" Priority=3D"66" SemiHidden=3D"false"
   UnhideWhenUsed=3D"false" Name=3D"Medium List 2 Accent 2"/>
  <w:LsdException Locked=3D"false" Priority=3D"67" SemiHidden=3D"false"
   UnhideWhenUsed=3D"false" Name=3D"Medium Grid 1 Accent 2"/>
  <w:LsdException Locked=3D"false" Priority=3D"68" SemiHidden=3D"false"
   UnhideWhenUsed=3D"false" Name=3D"Medium Grid 2 Accent 2"/>
  <w:LsdException Locked=3D"false" Priority=3D"69" SemiHidden=3D"false"
   UnhideWhenUsed=3D"false" Name=3D"Medium Grid 3 Accent 2"/>
  <w:LsdException Locked=3D"false" Priority=3D"70" SemiHidden=3D"false"
   UnhideWhenUsed=3D"false" Name=3D"Dark List Accent 2"/>
  <w:LsdException Locked=3D"false" Priority=3D"71" SemiHidden=3D"false"
   UnhideWhenUsed=3D"false" Name=3D"Colorful Shading Accent 2"/>
  <w:LsdException Locked=3D"false" Priority=3D"72" SemiHidden=3D"false"
   UnhideWhenUsed=3D"false" Name=3D"Colorful List Accent 2"/>
  <w:LsdException Locked=3D"false" Priority=3D"73" SemiHidden=3D"false"
   UnhideWhenUsed=3D"false" Name=3D"Colorful Grid Accent 2"/>
  <w:LsdException Locked=3D"false" Priority=3D"60" SemiHidden=3D"false"
   UnhideWhenUsed=3D"false" Name=3D"Light Shading Accent 3"/>
  <w:LsdException Locked=3D"false" Priority=3D"61" SemiHidden=3D"false"
   UnhideWhenUsed=3D"false" Name=3D"Light List Accent 3"/>
  <w:LsdException Locked=3D"false" Priority=3D"62" SemiHidden=3D"false"
   UnhideWhenUsed=3D"false" Name=3D"Light Grid Accent 3"/>
  <w:LsdException Locked=3D"false" Priority=3D"63" SemiHidden=3D"false"
   UnhideWhenUsed=3D"false" Name=3D"Medium Shading 1 Accent 3"/>
  <w:LsdException Locked=3D"false" Priority=3D"64" SemiHidden=3D"false"
   UnhideWhenUsed=3D"false" Name=3D"Medium Shading 2 Accent 3"/>
  <w:LsdException Locked=3D"false" Priority=3D"65" SemiHidden=3D"false"
   UnhideWhenUsed=3D"false" Name=3D"Medium List 1 Accent 3"/>
  <w:LsdException Locked=3D"false" Priority=3D"66" SemiHidden=3D"false"
   UnhideWhenUsed=3D"false" Name=3D"Medium List 2 Accent 3"/>
  <w:LsdException Locked=3D"false" Priority=3D"67" SemiHidden=3D"false"
   UnhideWhenUsed=3D"false" Name=3D"Medium Grid 1 Accent 3"/>
  <w:LsdException Locked=3D"false" Priority=3D"68" SemiHidden=3D"false"
   UnhideWhenUsed=3D"false" Name=3D"Medium Grid 2 Accent 3"/>
  <w:LsdException Locked=3D"false" Priority=3D"69" SemiHidden=3D"false"
   UnhideWhenUsed=3D"false" Name=3D"Medium Grid 3 Accent 3"/>
  <w:LsdException Locked=3D"false" Priority=3D"70" SemiHidden=3D"false"
   UnhideWhenUsed=3D"false" Name=3D"Dark List Accent 3"/>
  <w:LsdException Locked=3D"false" Priority=3D"71" SemiHidden=3D"false"
   UnhideWhenUsed=3D"false" Name=3D"Colorful Shading Accent 3"/>
  <w:LsdException Locked=3D"false" Priority=3D"72" SemiHidden=3D"false"
   UnhideWhenUsed=3D"false" Name=3D"Colorful List Accent 3"/>
  <w:LsdException Locked=3D"false" Priority=3D"73" SemiHidden=3D"false"
   UnhideWhenUsed=3D"false" Name=3D"Colorful Grid Accent 3"/>
  <w:LsdException Locked=3D"false" Priority=3D"60" SemiHidden=3D"false"
   UnhideWhenUsed=3D"false" Name=3D"Light Shading Accent 4"/>
  <w:LsdException Locked=3D"false" Priority=3D"61" SemiHidden=3D"false"
   UnhideWhenUsed=3D"false" Name=3D"Light List Accent 4"/>
  <w:LsdException Locked=3D"false" Priority=3D"62" SemiHidden=3D"false"
   UnhideWhenUsed=3D"false" Name=3D"Light Grid Accent 4"/>
  <w:LsdException Locked=3D"false" Priority=3D"63" SemiHidden=3D"false"
   UnhideWhenUsed=3D"false" Name=3D"Medium Shading 1 Accent 4"/>
  <w:LsdException Locked=3D"false" Priority=3D"64" SemiHidden=3D"false"
   UnhideWhenUsed=3D"false" Name=3D"Medium Shading 2 Accent 4"/>
  <w:LsdException Locked=3D"false" Priority=3D"65" SemiHidden=3D"false"
   UnhideWhenUsed=3D"false" Name=3D"Medium List 1 Accent 4"/>
  <w:LsdException Locked=3D"false" Priority=3D"66" SemiHidden=3D"false"
   UnhideWhenUsed=3D"false" Name=3D"Medium List 2 Accent 4"/>
  <w:LsdException Locked=3D"false" Priority=3D"67" SemiHidden=3D"false"
   UnhideWhenUsed=3D"false" Name=3D"Medium Grid 1 Accent 4"/>
  <w:LsdException Locked=3D"false" Priority=3D"68" SemiHidden=3D"false"
   UnhideWhenUsed=3D"false" Name=3D"Medium Grid 2 Accent 4"/>
  <w:LsdException Locked=3D"false" Priority=3D"69" SemiHidden=3D"false"
   UnhideWhenUsed=3D"false" Name=3D"Medium Grid 3 Accent 4"/>
  <w:LsdException Locked=3D"false" Priority=3D"70" SemiHidden=3D"false"
   UnhideWhenUsed=3D"false" Name=3D"Dark List Accent 4"/>
  <w:LsdException Locked=3D"false" Priority=3D"71" SemiHidden=3D"false"
   UnhideWhenUsed=3D"false" Name=3D"Colorful Shading Accent 4"/>
  <w:LsdException Locked=3D"false" Priority=3D"72" SemiHidden=3D"false"
   UnhideWhenUsed=3D"false" Name=3D"Colorful List Accent 4"/>
  <w:LsdException Locked=3D"false" Priority=3D"73" SemiHidden=3D"false"
   UnhideWhenUsed=3D"false" Name=3D"Colorful Grid Accent 4"/>
  <w:LsdException Locked=3D"false" Priority=3D"60" SemiHidden=3D"false"
   UnhideWhenUsed=3D"false" Name=3D"Light Shading Accent 5"/>
  <w:LsdException Locked=3D"false" Priority=3D"61" SemiHidden=3D"false"
   UnhideWhenUsed=3D"false" Name=3D"Light List Accent 5"/>
  <w:LsdException Locked=3D"false" Priority=3D"62" SemiHidden=3D"false"
   UnhideWhenUsed=3D"false" Name=3D"Light Grid Accent 5"/>
  <w:LsdException Locked=3D"false" Priority=3D"63" SemiHidden=3D"false"
   UnhideWhenUsed=3D"false" Name=3D"Medium Shading 1 Accent 5"/>
  <w:LsdException Locked=3D"false" Priority=3D"64" SemiHidden=3D"false"
   UnhideWhenUsed=3D"false" Name=3D"Medium Shading 2 Accent 5"/>
  <w:LsdException Locked=3D"false" Priority=3D"65" SemiHidden=3D"false"
   UnhideWhenUsed=3D"false" Name=3D"Medium List 1 Accent 5"/>
  <w:LsdException Locked=3D"false" Priority=3D"66" SemiHidden=3D"false"
   UnhideWhenUsed=3D"false" Name=3D"Medium List 2 Accent 5"/>
  <w:LsdException Locked=3D"false" Priority=3D"67" SemiHidden=3D"false"
   UnhideWhenUsed=3D"false" Name=3D"Medium Grid 1 Accent 5"/>
  <w:LsdException Locked=3D"false" Priority=3D"68" SemiHidden=3D"false"
   UnhideWhenUsed=3D"false" Name=3D"Medium Grid 2 Accent 5"/>
  <w:LsdException Locked=3D"false" Priority=3D"69" SemiHidden=3D"false"
   UnhideWhenUsed=3D"false" Name=3D"Medium Grid 3 Accent 5"/>
  <w:LsdException Locked=3D"false" Priority=3D"70" SemiHidden=3D"false"
   UnhideWhenUsed=3D"false" Name=3D"Dark List Accent 5"/>
  <w:LsdException Locked=3D"false" Priority=3D"71" SemiHidden=3D"false"
   UnhideWhenUsed=3D"false" Name=3D"Colorful Shading Accent 5"/>
  <w:LsdException Locked=3D"false" Priority=3D"72" SemiHidden=3D"false"
   UnhideWhenUsed=3D"false" Name=3D"Colorful List Accent 5"/>
  <w:LsdException Locked=3D"false" Priority=3D"73" SemiHidden=3D"false"
   UnhideWhenUsed=3D"false" Name=3D"Colorful Grid Accent 5"/>
  <w:LsdException Locked=3D"false" Priority=3D"60" SemiHidden=3D"false"
   UnhideWhenUsed=3D"false" Name=3D"Light Shading Accent 6"/>
  <w:LsdException Locked=3D"false" Priority=3D"61" SemiHidden=3D"false"
   UnhideWhenUsed=3D"false" Name=3D"Light List Accent 6"/>
  <w:LsdException Locked=3D"false" Priority=3D"62" SemiHidden=3D"false"
   UnhideWhenUsed=3D"false" Name=3D"Light Grid Accent 6"/>
  <w:LsdException Locked=3D"false" Priority=3D"63" SemiHidden=3D"false"
   UnhideWhenUsed=3D"false" Name=3D"Medium Shading 1 Accent 6"/>
  <w:LsdException Locked=3D"false" Priority=3D"64" SemiHidden=3D"false"
   UnhideWhenUsed=3D"false" Name=3D"Medium Shading 2 Accent 6"/>
  <w:LsdException Locked=3D"false" Priority=3D"65" SemiHidden=3D"false"
   UnhideWhenUsed=3D"false" Name=3D"Medium List 1 Accent 6"/>
  <w:LsdException Locked=3D"false" Priority=3D"66" SemiHidden=3D"false"
   UnhideWhenUsed=3D"false" Name=3D"Medium List 2 Accent 6"/>
  <w:LsdException Locked=3D"false" Priority=3D"67" SemiHidden=3D"false"
   UnhideWhenUsed=3D"false" Name=3D"Medium Grid 1 Accent 6"/>
  <w:LsdException Locked=3D"false" Priority=3D"68" SemiHidden=3D"false"
   UnhideWhenUsed=3D"false" Name=3D"Medium Grid 2 Accent 6"/>
  <w:LsdException Locked=3D"false" Priority=3D"69" SemiHidden=3D"false"
   UnhideWhenUsed=3D"false" Name=3D"Medium Grid 3 Accent 6"/>
  <w:LsdException Locked=3D"false" Priority=3D"70" SemiHidden=3D"false"
   UnhideWhenUsed=3D"false" Name=3D"Dark List Accent 6"/>
  <w:LsdException Locked=3D"false" Priority=3D"71" SemiHidden=3D"false"
   UnhideWhenUsed=3D"false" Name=3D"Colorful Shading Accent 6"/>
  <w:LsdException Locked=3D"false" Priority=3D"72" SemiHidden=3D"false"
   UnhideWhenUsed=3D"false" Name=3D"Colorful List Accent 6"/>
  <w:LsdException Locked=3D"false" Priority=3D"73" SemiHidden=3D"false"
   UnhideWhenUsed=3D"false" Name=3D"Colorful Grid Accent 6"/>
  <w:LsdException Locked=3D"false" Priority=3D"19" SemiHidden=3D"false"
   UnhideWhenUsed=3D"false" QFormat=3D"true" Name=3D"Subtle Emphasis"/>
  <w:LsdException Locked=3D"false" Priority=3D"21" SemiHidden=3D"false"
   UnhideWhenUsed=3D"false" QFormat=3D"true" Name=3D"Intense Emphasis"/>
  <w:LsdException Locked=3D"false" Priority=3D"31" SemiHidden=3D"false"
   UnhideWhenUsed=3D"false" QFormat=3D"true" Name=3D"Subtle Reference"/>
  <w:LsdException Locked=3D"false" Priority=3D"32" SemiHidden=3D"false"
   UnhideWhenUsed=3D"false" QFormat=3D"true" Name=3D"Intense Reference"/>
  <w:LsdException Locked=3D"false" Priority=3D"33" SemiHidden=3D"false"
   UnhideWhenUsed=3D"false" QFormat=3D"true" Name=3D"Book Title"/>
  <w:LsdException Locked=3D"false" Priority=3D"37" Name=3D"Bibliography"/>
  <w:LsdException Locked=3D"false" Priority=3D"39" QFormat=3D"true" Name=3D=
"TOC Heading"/>
 </w:LatentStyles>
</xml><![endif]-->
<style>
<!--
 /* Font Definitions */
 @font-face
	{font-family:SimSun;
	panose-1:2 1 6 0 3 1 1 1 1 1;
	mso-font-alt:\5B8B\4F53;
	mso-font-charset:134;
	mso-generic-font-family:auto;
	mso-font-pitch:variable;
	mso-font-signature:3 680460288 22 0 262145 0;}
@font-face
	{font-family:SimSun;
	panose-1:2 1 6 0 3 1 1 1 1 1;
	mso-font-alt:\5B8B\4F53;
	mso-font-charset:134;
	mso-generic-font-family:auto;
	mso-font-pitch:variable;
	mso-font-signature:3 680460288 22 0 262145 0;}
@font-face
	{font-family:Calibri;
	panose-1:2 15 5 2 2 2 4 3 2 4;
	mso-font-charset:0;
	mso-generic-font-family:swiss;
	mso-font-pitch:variable;
	mso-font-signature:-536870145 1073786111 1 0 415 0;}
@font-face
	{font-family:Tahoma;
	panose-1:2 11 6 4 3 5 4 4 2 4;
	mso-font-charset:0;
	mso-generic-font-family:swiss;
	mso-font-pitch:variable;
	mso-font-signature:-520081665 -1073717157 41 0 66047 0;}
@font-face
	{font-family:"\@SimSun";
	panose-1:2 1 6 0 3 1 1 1 1 1;
	mso-font-charset:134;
	mso-generic-font-family:auto;
	mso-font-pitch:variable;
	mso-font-signature:3 680460288 22 0 262145 0;}
 /* Style Definitions */
 p.MsoNormal, li.MsoNormal, div.MsoNormal
	{mso-style-unhide:no;
	mso-style-qformat:yes;
	mso-style-parent:"";
	margin-top:0cm;
	margin-right:0cm;
	margin-bottom:10.0pt;
	margin-left:0cm;
	line-height:115%;
	mso-pagination:widow-orphan;
	font-size:11.0pt;
	font-family:"Calibri","sans-serif";
	mso-ascii-font-family:Calibri;
	mso-ascii-theme-font:minor-latin;
	mso-fareast-font-family:SimSun;
	mso-fareast-theme-font:minor-fareast;
	mso-hansi-font-family:Calibri;
	mso-hansi-theme-font:minor-latin;
	mso-bidi-font-family:Arial;
	mso-bidi-theme-font:minor-bidi;}
p.MsoAcetate, li.MsoAcetate, div.MsoAcetate
	{mso-style-noshow:yes;
	mso-style-priority:99;
	mso-style-link:"Balloon Text Char";
	margin:0cm;
	margin-bottom:.0001pt;
	mso-pagination:widow-orphan;
	font-size:8.0pt;
	font-family:"Tahoma","sans-serif";
	mso-fareast-font-family:SimSun;
	mso-fareast-theme-font:minor-fareast;}
span.BalloonTextChar
	{mso-style-name:"Balloon Text Char";
	mso-style-noshow:yes;
	mso-style-priority:99;
	mso-style-unhide:no;
	mso-style-locked:yes;
	mso-style-link:"Balloon Text";
	mso-ansi-font-size:8.0pt;
	mso-bidi-font-size:8.0pt;
	font-family:"Tahoma","sans-serif";
	mso-ascii-font-family:Tahoma;
	mso-hansi-font-family:Tahoma;
	mso-bidi-font-family:Tahoma;}
.MsoChpDefault
	{mso-style-type:export-only;
	mso-default-props:yes;
	font-family:"Calibri","sans-serif";
	mso-ascii-font-family:Calibri;
	mso-ascii-theme-font:minor-latin;
	mso-fareast-font-family:SimSun;
	mso-fareast-theme-font:minor-fareast;
	mso-hansi-font-family:Calibri;
	mso-hansi-theme-font:minor-latin;
	mso-bidi-font-family:Arial;
	mso-bidi-theme-font:minor-bidi;}
.MsoPapDefault
	{mso-style-type:export-only;
	margin-bottom:10.0pt;
	line-height:115%;}
@page WordSection1
	{size:595.3pt 841.9pt;
	margin:72.0pt 72.0pt 72.0pt 72.0pt;
	mso-header-margin:35.4pt;
	mso-footer-margin:35.4pt;
	mso-paper-source:0;}
div.WordSection1
	{page:WordSection1;}
-->
</style>
<!--[if gte mso 10]>
<style>
 /* Style Definitions */
 table.MsoNormalTable
	{mso-style-name:"Table Normal";
	mso-tstyle-rowband-size:0;
	mso-tstyle-colband-size:0;
	mso-style-noshow:yes;
	mso-style-priority:99;
	mso-style-parent:"";
	mso-padding-alt:0cm 5.4pt 0cm 5.4pt;
	mso-para-margin-top:0cm;
	mso-para-margin-right:0cm;
	mso-para-margin-bottom:10.0pt;
	mso-para-margin-left:0cm;
	line-height:115%;
	mso-pagination:widow-orphan;
	font-size:11.0pt;
	font-family:"Calibri","sans-serif";
	mso-ascii-font-family:Calibri;
	mso-ascii-theme-font:minor-latin;
	mso-hansi-font-family:Calibri;
	mso-hansi-theme-font:minor-latin;}
</style>
<![endif]--><!--[if gte mso 9]><xml>
 <o:shapedefaults v:ext=3D"edit" spidmax=3D"1026"/>
</xml><![endif]--><!--[if gte mso 9]><xml>
 <o:shapelayout v:ext=3D"edit">
  <o:idmap v:ext=3D"edit" data=3D"1"/>
 </o:shapelayout></xml><![endif]-->
</head>

<body lang=3DEN-GB style=3D'tab-interval:36.0pt'>

<div class=3DWordSection1>

<p class=3DMsoNormal><o:p>&nbsp;</o:p></p>

<p class=3DMsoNormal><span style=3D'mso-no-proof:yes'><!--[if gte vml 1]><v=
:shapetype
 id=3D"_x0000_t75" coordsize=3D"21600,21600" o:spt=3D"75" o:preferrelative=
=3D"t"
 path=3D"m@4@5l@4@11@9@11@9@5xe" filled=3D"f" stroked=3D"f">
 <v:stroke joinstyle=3D"miter"/>
 <v:formulas>
  <v:f eqn=3D"if lineDrawn pixelLineWidth 0"/>
  <v:f eqn=3D"sum @0 1 0"/>
  <v:f eqn=3D"sum 0 0 @1"/>
  <v:f eqn=3D"prod @2 1 2"/>
  <v:f eqn=3D"prod @3 21600 pixelWidth"/>
  <v:f eqn=3D"prod @3 21600 pixelHeight"/>
  <v:f eqn=3D"sum @0 0 1"/>
  <v:f eqn=3D"prod @6 1 2"/>
  <v:f eqn=3D"prod @7 21600 pixelWidth"/>
  <v:f eqn=3D"sum @8 21600 0"/>
  <v:f eqn=3D"prod @7 21600 pixelHeight"/>
  <v:f eqn=3D"sum @10 21600 0"/>
 </v:formulas>
 <v:path o:extrusionok=3D"f" gradientshapeok=3D"t" o:connecttype=3D"rect"/>
 <o:lock v:ext=3D"edit" aspectratio=3D"t"/>
</v:shapetype><v:shape id=3D"Picture_x0020_1" o:spid=3D"_x0000_i1025" type=
=3D"#_x0000_t75"
 style=3D'width:480pt;height:5in;visibility:visible;mso-wrap-style:square'>
 <v:imagedata src=3D"Streamingsimulation_files/image001.gif" o:title=3D""/>
</v:shape><![endif]--><![if !vml]><img width=3D640 height=3D480
src=3D"Streamingsimulation_files/image001.gif" v:shapes=3D"Picture_x0020_1"=
><![endif]></span></p>

</div>

</body>

</html>

------=_NextPart_01CE1BE7.248BF370
Content-Location: file:///C:/1E4BB24E/Streamingsimulation_files/themedata.thmx
Content-Transfer-Encoding: base64
Content-Type: application/vnd.ms-officetheme

UEsDBBQABgAIAAAAIQDp3g+//wAAABwCAAATAAAAW0NvbnRlbnRfVHlwZXNdLnhtbKyRy07DMBBF
90j8g+UtSpyyQAgl6YLHjseifMDImSQWydiyp1X790zSVEKoIBZsLNkz954743K9Hwe1w5icp0qv
8kIrJOsbR12l3zdP2a1WiYEaGDxhpQ+Y9Lq+vCg3h4BJiZpSpXvmcGdMsj2OkHIfkKTS+jgCyzV2
JoD9gA7NdVHcGOuJkTjjyUPX5QO2sB1YPe7l+Zgk4pC0uj82TqxKQwiDs8CS1Oyo+UbJFkIuyrkn
9S6kK4mhzVnCVPkZsOheZTXRNajeIPILjBLDsAyJX89nIBkt5r87nons29ZZbLzdjrKOfDZezE7B
/xRg9T/oE9PMf1t/AgAA//8DAFBLAwQUAAYACAAAACEApdan58AAAAA2AQAACwAAAF9yZWxzLy5y
ZWxzhI/PasMwDIfvhb2D0X1R0sMYJXYvpZBDL6N9AOEof2giG9sb69tPxwYKuwiEpO/3qT3+rov5
4ZTnIBaaqgbD4kM/y2jhdj2/f4LJhaSnJQhbeHCGo3vbtV+8UNGjPM0xG6VItjCVEg+I2U+8Uq5C
ZNHJENJKRds0YiR/p5FxX9cfmJ4Z4DZM0/UWUtc3YK6PqMn/s8MwzJ5PwX+vLOVFBG43lExp5GKh
qC/jU72QqGWq1B7Qtbj51v0BAAD//wMAUEsDBBQABgAIAAAAIQBreZYWgwAAAIoAAAAcAAAAdGhl
bWUvdGhlbWUvdGhlbWVNYW5hZ2VyLnhtbAzMTQrDIBBA4X2hd5DZN2O7KEVissuuu/YAQ5waQceg
0p/b1+XjgzfO3xTVm0sNWSycBw2KZc0uiLfwfCynG6jaSBzFLGzhxxXm6XgYybSNE99JyHNRfSPV
kIWttd0g1rUr1SHvLN1euSRqPYtHV+jT9yniResrJgoCOP0BAAD//wMAUEsDBBQABgAIAAAAIQAw
3UMpqAYAAKQbAAAWAAAAdGhlbWUvdGhlbWUvdGhlbWUxLnhtbOxZT2/bNhS/D9h3IHRvYyd2Ggd1
itixmy1NG8Ruhx5piZbYUKJA0kl9G9rjgAHDumGHFdhth2FbgRbYpfs02TpsHdCvsEdSksVYXpI2
2IqtPiQS+eP7/x4fqavX7scMHRIhKU/aXv1yzUMk8XlAk7Dt3R72L615SCqcBJjxhLS9KZHetY33
37uK11VEYoJgfSLXcduLlErXl5akD8NYXuYpSWBuzEWMFbyKcCkQ+AjoxmxpuVZbXYoxTTyU4BjI
3hqPqU/QUJP0NnLiPQaviZJ6wGdioEkTZ4XBBgd1jZBT2WUCHWLW9oBPwI+G5L7yEMNSwUTbq5mf
t7RxdQmvZ4uYWrC2tK5vftm6bEFwsGx4inBUMK33G60rWwV9A2BqHtfr9bq9ekHPALDvg6ZWljLN
Rn+t3slplkD2cZ52t9asNVx8if7KnMytTqfTbGWyWKIGZB8bc/i12mpjc9nBG5DFN+fwjc5mt7vq
4A3I4lfn8P0rrdWGizegiNHkYA6tHdrvZ9QLyJiz7Ur4GsDXahl8hoJoKKJLsxjzRC2KtRjf46IP
AA1kWNEEqWlKxtiHKO7ieCQo1gzwOsGlGTvky7khzQtJX9BUtb0PUwwZMaP36vn3r54/RccPnh0/
+On44cPjBz9aQs6qbZyE5VUvv/3sz8cfoz+efvPy0RfVeFnG//rDJ7/8/Hk1ENJnJs6LL5/89uzJ
i68+/f27RxXwTYFHZfiQxkSim+QI7fMYFDNWcSUnI3G+FcMI0/KKzSSUOMGaSwX9nooc9M0pZpl3
HDk6xLXgHQHlowp4fXLPEXgQiYmiFZx3otgB7nLOOlxUWmFH8yqZeThJwmrmYlLG7WN8WMW7ixPH
v71JCnUzD0tH8W5EHDH3GE4UDklCFNJz/ICQCu3uUurYdZf6gks+VuguRR1MK00ypCMnmmaLtmkM
fplW6Qz+dmyzewd1OKvSeoscukjICswqhB8S5pjxOp4oHFeRHOKYlQ1+A6uoSsjBVPhlXE8q8HRI
GEe9gEhZteaWAH1LTt/BULEq3b7LprGLFIoeVNG8gTkvI7f4QTfCcVqFHdAkKmM/kAcQohjtcVUF
3+Vuhuh38ANOFrr7DiWOu0+vBrdp6Ig0CxA9MxEVvrxOuBO/gykbY2JKDRR1p1bHNPm7ws0oVG7L
4eIKN5TKF18/rpD7bS3Zm7B7VeXM9olCvQh3sjx3uQjo21+dt/Ak2SOQEPNb1Lvi/K44e//54rwo
ny++JM+qMBRo3YvYRtu03fHCrntMGRuoKSM3pGm8Jew9QR8G9Tpz4iTFKSyN4FFnMjBwcKHAZg0S
XH1EVTSIcApNe93TREKZkQ4lSrmEw6IZrqSt8dD4K3vUbOpDiK0cEqtdHtjhFT2cnzUKMkaq0Bxo
c0YrmsBZma1cyYiCbq/DrK6FOjO3uhHNFEWHW6GyNrE5lIPJC9VgsLAmNDUIWiGw8iqc+TVrOOxg
RgJtd+uj3C3GCxfpIhnhgGQ+0nrP+6hunJTHypwiWg8bDPrgeIrVStxamuwbcDuLk8rsGgvY5d57
Ey/lETzzElA7mY4sKScnS9BR22s1l5se8nHa9sZwTobHOAWvS91HYhbCZZOvhA37U5PZZPnMm61c
MTcJ6nD1Ye0+p7BTB1Ih1RaWkQ0NM5WFAEs0Jyv/chPMelEKVFSjs0mxsgbB8K9JAXZ0XUvGY+Kr
srNLI9p29jUrpXyiiBhEwREasYnYx+B+HaqgT0AlXHeYiqBf4G5OW9tMucU5S7ryjZjB2XHM0ghn
5VanaJ7JFm4KUiGDeSuJB7pVym6UO78qJuUvSJVyGP/PVNH7Cdw+rATaAz5cDQuMdKa0PS5UxKEK
pRH1+wIaB1M7IFrgfhemIajggtr8F+RQ/7c5Z2mYtIZDpNqnIRIU9iMVCUL2oCyZ6DuFWD3buyxJ
lhEyEVUSV6ZW7BE5JGyoa+Cq3ts9FEGom2qSlQGDOxl/7nuWQaNQNznlfHMqWbH32hz4pzsfm8yg
lFuHTUOT278QsWgPZruqXW+W53tvWRE9MWuzGnlWALPSVtDK0v41RTjnVmsr1pzGy81cOPDivMYw
WDREKdwhIf0H9j8qfGa/dugNdcj3obYi+HihiUHYQFRfso0H0gXSDo6gcbKDNpg0KWvarHXSVss3
6wvudAu+J4ytJTuLv89p7KI5c9k5uXiRxs4s7Njaji00NXj2ZIrC0Dg/yBjHmM9k5S9ZfHQPHL0F
3wwmTEkTTPCdSmDooQcmDyD5LUezdOMvAAAA//8DAFBLAwQUAAYACAAAACEADdGQn7YAAAAbAQAA
JwAAAHRoZW1lL3RoZW1lL19yZWxzL3RoZW1lTWFuYWdlci54bWwucmVsc4SPTQrCMBSE94J3CG9v
07oQkSbdiNCt1AOE5DUNNj8kUeztDa4sCC6HYb6ZabuXnckTYzLeMWiqGgg66ZVxmsFtuOyOQFIW
TonZO2SwYIKObzftFWeRSyhNJiRSKC4xmHIOJ0qTnNCKVPmArjijj1bkIqOmQci70Ej3dX2g8ZsB
fMUkvWIQe9UAGZZQmv+z/TgaiWcvHxZd/lFBc9mFBSiixszgI5uqTATKW7q6xN8AAAD//wMAUEsB
Ai0AFAAGAAgAAAAhAOneD7//AAAAHAIAABMAAAAAAAAAAAAAAAAAAAAAAFtDb250ZW50X1R5cGVz
XS54bWxQSwECLQAUAAYACAAAACEApdan58AAAAA2AQAACwAAAAAAAAAAAAAAAAAwAQAAX3JlbHMv
LnJlbHNQSwECLQAUAAYACAAAACEAa3mWFoMAAACKAAAAHAAAAAAAAAAAAAAAAAAZAgAAdGhlbWUv
dGhlbWUvdGhlbWVNYW5hZ2VyLnhtbFBLAQItABQABgAIAAAAIQAw3UMpqAYAAKQbAAAWAAAAAAAA
AAAAAAAAANYCAAB0aGVtZS90aGVtZS90aGVtZTEueG1sUEsBAi0AFAAGAAgAAAAhAA3RkJ+2AAAA
GwEAACcAAAAAAAAAAAAAAAAAsgkAAHRoZW1lL3RoZW1lL19yZWxzL3RoZW1lTWFuYWdlci54bWwu
cmVsc1BLBQYAAAAABQAFAF0BAACtCgAAAAA=

------=_NextPart_01CE1BE7.248BF370
Content-Location: file:///C:/1E4BB24E/Streamingsimulation_files/colorschememapping.xml
Content-Transfer-Encoding: quoted-printable
Content-Type: text/xml

<?xml version=3D"1.0" encoding=3D"UTF-8" standalone=3D"yes"?>
<a:clrMap xmlns:a=3D"http://schemas.openxmlformats.org/drawingml/2006/main"=
 bg1=3D"lt1" tx1=3D"dk1" bg2=3D"lt2" tx2=3D"dk2" accent1=3D"accent1" accent=
2=3D"accent2" accent3=3D"accent3" accent4=3D"accent4" accent5=3D"accent5" a=
ccent6=3D"accent6" hlink=3D"hlink" folHlink=3D"folHlink"/>
------=_NextPart_01CE1BE7.248BF370
Content-Location: file:///C:/1E4BB24E/Streamingsimulation_files/image001.gif
Content-Transfer-Encoding: base64
Content-Type: image/gif

R0lGODlhgALgAfcAAMZwGdqZFtayHMS+KaPCS5SZan9/g35+i39+gH5/fnmPeGq1cFi8dTq7hh2u
mBKpog2bqwJ3sgFgugBhyQCD2ACm1wC92gLO4wbg7Bjl4DPq5ULq8knq61nu3mrg3nnP7n7E/H/T
/X/n/oH1/If89pP+6Z3+36j+07D+yqf+uaD+q7TmoeawiPKde/a2cvfSd/zldPrzden1b9j8ct7+
huL+ltv+odP+q+X+2P7+/v7+/v7+/v7+/v7+/v7+/v7+/v7+/v7+/v7+/v7+/v7+/v7+/v7+/v7+
/v7+/v7+/v/+/v7+/v7+/v7+/v7+/v7+/v7+/v7+/v////7+/v7+/v7+/v7+/v7+/v7+/v7+/v7+
/v////7+/v7+/v7+/v7+/v7+/v7+/v7+/v7+/v////7+/v7+/v7+/v7+/v7+/v7+/v7+/v7+/v//
//7+/v7+/v7+/v7+/v7+/v7+/v7+/v7+/v////7+/v7+/v7+/v7+/v7+/v7+/v7+/v7+/v////7+
/v7+/v7+/v7+/v7+/v7+/v7+/v7+/v////7+/v7+/v7+/v7+/v7+/v7+/v7+/v7+/v////7+/v7+
/v7+/v7+/v7+/v7+/v7+/v7+/v////7+/v7+/v7+/v7+/v7+/v7+/v7+/v7+/v////7+/v7+/v7+
/v7+/v7+/v7+/v7+/v7+/v////7+/v7+/v7+/v7+/v7+/v7+/v7+/v7+/v7+/v////7+/v7+/v7+
/v7+/v7+/v7+/v7+/v7+/v////7+/v7+/v7+/v7+/v7+/v7+/v7+/v7+/v////7+/v7+/v7+/v7+
/v7+/v7+/v7+/v7+/v7+/v////7+/v7+/v7+/v7+/v7+/v7+/v7+/v7+/v7+/v////7+/v7+/v7+
/v7+/v7+/v7+/v7+/v7+/v////7+/v7+/v7+/v7+/v7+/v7+/v7+/v7+/v7+/v7+/v////7+/v7+
/v7+/v7+/v7+/v7+/v7+/v7+/v7+/v7+/v////7+/v7+/v7+/v///yH/C05FVFNDQVBFMi4wAwEA
AAAh+QQACgAAACwAAAAAgALgAQAI/gDJCBxIsKDBgwgTKlzIsKHDhxAjSpxIsaLFixgzatzIsaPH
jyBDihxJsqTJkyhTqlzJsqXLlzBjypxJs6bNmzhz6tzJs6fPn0CDCh1KtKjRo0iTKl3KtKnTp1Cj
Sp1KtarVq1izat3KtavXr2DDih1LtqzZs2jTql3Ltq3bt3Djyp1Lt67du3jz6t3Lt6/fv4ADCx5M
uLDhw4gTK17MuLHjx5AjS55MubLly5gza97MubPnz6BDix5NurTp06hTq17NurXr17Bjy55Nu7bt
27hz697Nu7fv38CDCx9OvLjx48iTK1/OvLnz59CjS59Ovbr169iza9/Ovbv37+DD/osfT768+fPo
06tfz769+/fw48ufT7++/fv48+vfz7+///8ABijggAQWaOCBCCao4IIMNujggxBGKOGEFFZo4YUY
Zqjhhhx26OGHIIYo4ogklmjiiSimqOKKLLbo4oswxijjjDTWaOONOOao44489ujjj0AGKeSQRBZp
5JFIJqnkkkw26eSTUEYp5ZRUVmnllVhmqeWWXHbp5ZdghinmiwmMqWECaJZp5oRpqlkmmms+CGdB
apIxZ5wI3kknQXriCSCaCNR5kKAC9emnfoYiROhAix5aXwIIQNRooZM6yl6bElVKqaXvJfqQpoyC
yml3mF4kKqOjkucpRaeimup3/qtOlGakn7b66nKlaqSnrZveOl2sshoK7KC8+vrbsJICi+yexiKX
a0bL9lprs8QF2lGarGZKK7W8YbtRoMUSG1G03Krm7UbkNpRuuOWOli5D53pU7LvtdhYvRuCWtC67
9Vp2r6nWprTttP2K9q+p/OoabsIFK0avQgevtG/DmD2LUcQvTUyxZA9DzLBJ8368MV4dK1pySguP
nJjFCIssccgqE3ayQRj/pHHMfOXL0cw1Lewyzl8Bei3PN737M9BaER3q0TrdjPRakDJt58BWOf00
WTVnmvVUPl8t1tbjSl0UvWJ7DZTSoZpltNlZgV0r2k5ZzXbccMPNdaZz0y21/ttlyZ33UHXbnTTM
fwcF7t5le9V14TzZzXdcazOOk+OJ90245DE9Dq/md70bMOYvI+4Yu5WDPujn35b+ltGqmx644Hax
brq8gW8W+ewtD936XovjHrbYsA/mt+8m6767YMMTzzLCraVMPJ/AB/9Y8oVzvpD1Bl8u+eu6Of83
9glJb3vvV4Mf/vEESaA+ZbIDbT6x4iOk/vyV3b4x5S7NT7+/Wjf8Ps3xY4j+1neZ9lHrfwCkyQA1
Y79U6QxdCPTI/mynrVThLyf684wB4/RAjXQQJwvUoPfEFEHoqSSEDRmgBEJDPi6VkFIBPAgKBThD
EfZvSxfMXw0VskODEJB9/iOk0gvtFEMaZvAhE5RfD6d3QynlUCZLvIgKC9jCJC3PIkPcSBI5MsWK
BdFIlEPfRKJokS5mpopAGuIHS/JDh5iRi1usWLCE9MSTkNGHd6xIHL0oKx8NMYtIzONABCmRN1Kw
iTW6YkUAGRFD8vCIj1xhICFpL9KJkUFhnIkjF9JGJe7Rk59kIOlglMUiTrKTGtkkKFGpwTmuyG5r
VKAkJUhIgVASlP4a5YlKeclC3lKLv8yIKqeHxg7VLZYiCeUqZwlHVgqzlg5zJYcUyape2jKYCRmm
FJ2JEW1ChmxnymRLvJk+aJ6SmcDEJhARKSHBmXKZ6IwkN685Tzyqs5vx/mSgNB3ES2uuspApvGdB
yEkRgdZPl5gs2zsDqkw9QjOP9bRnQ/nHTgL9kZHPzGdGJ1rOiNaSoAfto0XreBNznvMjICVDSkMa
tj+JEyUc7WhMfalRfBp0kDedKWIsuR9ALpSeEZVpUGla023etJxG1OlhwHkfd/4UqEOFalEdqtST
0vKoi9lgp17nT6FOdaACxapKVwqRqBLVrFnd53pI+hKTMnSmZLVqR+LqMISeh5rB6qo8vzrGhxoU
rXR962e0Ch6f6pWhICHrRD/qVsGCxq7eceph38rXs1a2kYwV6zkvy7FiVsewJ0TrWDU7ycT6dbFm
DSwTK/orhf40pSrk/uwpTavZoGa2qp0VaWsR91SplpW0bgQuZVF6W9Gus6XQYetKVnpHsaqWhiFh
LmqNaxjIOot7mmwsJ4srW7k2E7fD5SNyi4NXtWaXuklN7V9l+1x50la41TVvbySrE/hut7Ye1Wl7
I/le9C7VurkB7U72K0Pt7vWyBC4weNNrw/HexrC9VGqCJdpfzkJUvfa9Lwt1S5sw+vO0C75vd4OL
3/BSdsSOfaxnU8PLtoLYv9k0cIwzvMzN9tdd8j3NS3WI33r2OMTbjS6IEWtjdwHYyNGTJY3/WeSr
oji9TxYxgmVMzLfpeMfnhTE8m5xNy763wlPmqJYDAypvTXYu5c3x/nkrjFkfO5fKMwbzb/m6ZMAI
q09nhgvsMJrOMSvYzxK1MJwDHeW9svmMaRuUCF0bYcAOmsLE5S505wxk/h76jLHKs1rou9w3Pxqs
hT4wZhnM5bkCmtCYlhbNMB09vUq3zoG+caTh+mmhXvq4fFJULlsdk9hSeqoSnjCohexpOmMY1sM+
aKWEheudaXq0uP3qi0PNZCc72sRQJja19bKsXUWmnyVFtld/fes+bxvV3v3uqdHcvmcPzrUDXjdO
zTldQdcaqXIubVJ/fW65nOxNjOF0fcU9b3n7ttSpJPjBrR3mSrNbYSvD8sAVfu+FY7vLbXb4n7Ud
VUL2W3FE6+27/uENFF9HmuPsza9+K05PlM/54npWmsjbxmh3p9vc5cY5whOucXQzHHIh5zPWJC6U
5opW2DLNN8wLnHGDA9XlbpG5zaMi4KW4eeUsVzi0jy5tSX8552eR+n8/InQMTnvWTs+613+OdqgF
fepPqfpWTD5b9/Kb2FAnsbFTrvXRbvpoM78KhMOCdItnu+1o/3jBO672ni+lhIGvGqPJ0nisO97W
smb7iTMfFqnDvSlyL4vTt873rh/78vgG+4z33nDUAw7wn2fK4NFS+bSv3dRaL7zhV+96m729MAJP
i+6hnfel+9DLiE/8zeVHNwgC36lvGb7fVR9nKd+dtii3t/GD/gL52Ctl9tGvPfWNenrFQ5XjxReK
52WWuMgP5cLIn7XStz/vppu/5fM/G+zZP/m7qLz82pZ/k2Z9etd70zd+RSN2g4E6CuN+VvFqvTd8
tWdvEdh3LAcSDLhIZfc1sOd9UaFYYcV1Fjh6dEdqGrZZ93eAOxFBDih4dnIxHjgVEnh2yYd7Bshd
93eBEActLYgVbmJJMVgVE3h91oZ+idd6RpiAO9gYgmIrGxgXo0d6GbdvKIh3AmhpRsRvKZhXP9OD
XEEoouKFYjGEyleAtleBI0hrOmhlDTgZizIpTzgXM3iDL4aAZZR7sNV3BLOEbiguMMQZJWhqyURv
tmV5dJiC/oF4gi2xfgV0PkFIeGSoeTbIeGlIgnpIO/unTwAUh3kRiZOYfgQoiZ/YE2gjhmoDPU0Y
GvVmfwFoh8kmYlpohU3DiPaiaibEGhB4hmi4i5R4iFHIPM7HQsPyiG0BgqgVf04GioY2gGa4hXkF
QcTYNw5hinIRV/9XepaYjcFWgFUoE6UYjWjRbakxh4aYg56obq3njNNIi+aiLuB4FpXoaIWIjDaY
fcuHEt8YG63yjqLni0e3eTvHc4hoUup4PUxDjbxzKgi5FuSoiwBYhjW4glJHNbOxj6QhfQYohZRG
ZAHJcz6Rj7uBLPz4FRjpjwNZjq2YEyWETLihkKLRkOaI/ofF5pAFqWY2GWAKOZJcsV7dJX1jNYhD
loVE6I3sOBwW6Rq5GJO8eJJqmJEOBoO4kpOtkZSuWFDxmI4w8UILyT7qgovGaHrYuIUmSYEZc5Bb
yVIGuRowOZSjCJGkCJLUcZSocYFU6ZZt2ThmqZNuKJVzGYXWeI2xiH2Nk4FYpJeN2JWmQZeKiZKc
ZxPfaJiIhpgXuZhMaYjKmJVmWR6tQpGfUZLaGGysF5gzQZjVBJmDxZeqeI7qdpk1FhMsyVrmIZed
mVN9VYlAaZmYCY3wIZKmiRWAyZa4d5tcV5aZOB+yqZY0GJHoyH2ZaR/72Jtj8ZUBZVlM6XsdiCjH
2Zek/lWI5VideOls//GcyCmToPmZNfmMbRgg4qgaV0mBxkaPRAmeBpKdk2melQmcLtF90Dlf4pmY
lFmZ7nmeaRmMmDSNp+GTGSmdxKmbEMKbpeGZ5vl68kkhnKloowGhAKp/14khDvqSYtaTCPqLE8qD
xvQpsZGU9zmLG+oh3bafY0iIJqmSzTki9KmdVRVTIuiU6MmDFQoiHTqeMdqRKqGVLgorBgqkESqk
+OhsRRoeNfqgfgmjAno+BBoj/WmjGap+CphIJnqg/zmlUFmlNrKeUKqDIsqkDMojT9oZGAqmvzOi
foSaqXmVMoqmRbKmmpFTOXqmbyqmREKmsCGlfLqO/na6JFeKlMmZn3DpJICKpPLopqhYqE50pFO5
hh9BmhqYJXh6oZdIdpKKJT/KnoPKo+npJU6IpHhZnGHSqGWqo5laqmtyqJxqqVpzkJzCqnPqqnvI
g036IbIKGrTqjj16k36yqXk6qiaTl+Xyq89RO/1yqtHxmPdjrMKxqCPDrEZZlDGDq8ChrU+Drd2z
pX8zrMzSLXXjOtTaPLyFO+DqGkTaq0aCqeUqG3tDrq5DqK/RffbKrulaSTP6PNdDqaYhrQDbpZtD
GvpZsMRaKI8lrxymsBOxr0TEGccEr18SLRZ7FKIDsegisHu5ohzbse7YWf8askPjsXX1qSbrqQ3h
/rB/ITSwurIjwa1+QaQyKzEoyxcXdbOLiK99kWQ8m58GSzJo85pBexLQGjvKerQz0aLsJrE+y7Q9
M7Rut7RSOzlUG3Ybe7USmbMceLJcazNeC3JgG7ZnE7Vd8a5mSxQ0SxUwqzBQu7Y5IbEZm0BwKrdG
0a6yZ7V4+31Zu7d707dQkbR7qzuCS3V6azMuKymLe7hIQbhaurWOWxVOCI7YNbk+CLmzqLKY64N/
SxN/1Lmdt6tNu66i23n9ShJa2bin67mSuYjO2rpaO7IsYbqymxaaO7PnerttkbuYaLi8G3WJ+6pp
Grx69rkaKDWsa7xhh7xPCYN1y7y66xDLSzNx/ku70sttzpusZZu9vLO9SwO83luzequ8Zzm+Gvu3
b0ui6BtflLqz7btTz2m78bsyY7uw9Ys8r5u8+fttZVaY19u/MgMxiyTAcqRrfWrAuYTA7hi9Cpy3
B7Gv5/vAozuvfkjBgzUwcDjBGCyNDEsnDtzBg/vBZGC0IrxonHjCwKfCLNzCLvzCMBzDMjzDNFzD
NnzDOJzDOrzDPNzDPvzDQBzEQjzERFzERnzESJzESrzETNzETvzEUBzFUjzFVFzFVnzFWJzFWrzF
XNzFXvzFYBzGYjzGZFzGZnzGaJzGarzGbNzGbvzGcBzHcjzHdFzHdnzHeJzHerzHfNzHfvzHRYAc
yII8yIRcyIZ8yIicyIq8yIzcyI78yJAcyZI8yZRcyZZ8yZicyZq8yZzcyZ78yaAcyqI8yqRcyqZ8
yqicyqq8yp0REAAh+QQACgAAACwAAAAAgALgAYfGcBnamRbWshzEvimjwkuUmWp/f4N+fot/foB+
f355j3hqtXBYvHU6u4YdrpgSqaINm6sCd7IBYLoAYckAg9gAptcAvdoCzuMG4OwY5eAz6uVC6vJJ
6utZ7t5q4N55z+5+xPx/0/1/5/6B9fyH/PaT/umd/t+o/tOw/sqn/rmg/qu05qHmsIjynXv2tnL3
0nf85XT683Xp9W/Y/HLe/obi/pbb/qHT/qvl/tj+/v7+/v7+/v7+/v7+/v7+/v7+/v7+/v7+/v7+
/v7+/v7+/v7+/v7+/v7+/v7+/v7+/v7//v7+/v7+/v7+/v7+/v7+/v7+/v7+/v7////+/v7+/v7+
/v7+/v7+/v7+/v7+/v7+/v7////+/v7+/v7+/v7+/v7+/v7+/v7+/v7+/v7////+/v7+/v7+/v7+
/v7+/v7+/v7+/v7+/v7////+/v7+/v7+/v7+/v7+/v7+/v7+/v7+/v7////+/v7+/v7+/v7+/v7+
/v7+/v7+/v7+/v7////+/v7+/v7+/v7+/v7+/v7+/v7+/v7+/v7////+/v7+/v7+/v7+/v7+/v7+
/v7+/v7+/v7////+/v7+/v7+/v7+/v7+/v7+/v7+/v7+/v7////+/v7+/v7+/v7+/v7+/v7+/v7+
/v7+/v7////+/v7+/v7+/v7+/v7+/v7+/v7+/v7+/v7////+/v7+/v7+/v7+/v7+/v7+/v7+/v7+
/v7+/v7////+/v7+/v7+/v7+/v7+/v7+/v7+/v7+/v7////+/v7+/v7+/v7+/v7+/v7+/v7+/v7+
/v7////+/v7+/v7+/v7+/v7+/v7+/v7+/v7+/v7+/v7////+/v7+/v7+/v7+/v7+/v7+/v7+/v7+
/v7+/v7////+/v7+/v7+/v7+/v7+/v7+/v7+/v7+/v7////+/v7+/v7+/v7+/v7+/v7+/v7+/v7+
/v7+/v7+/v7////+/v7+/v7+/v7+/v7+/v7+/v7+/v7+/v7+/v7+/v7////+/v7+/v7+/v7///8I
/gDJCBxIsKDBgwgTKlzIsKHDhxAjSpxIsaLFixgzatzIsaPHjyBDihxJsqTJkyhTqlzJsqXLlzBj
ypxJs6bNmzhz6tzJs6fPn0CDCh1KtKjRo0iTKl3KtKnTp1CjSp1KtarVq1izat3KtavXr2DDih1L
tqzZs2jTql3Ltq3bt3Djyp1Lt67du3jz6t3Lt6/fv4ADCx5MuLDhw4gTK17MuLHjx5AjS55MubLl
y5gza97MubPnz6BDix5NurTp06hTq17NurXr17Bjy55Nu7bt27hz697Nu7fv38CDCx9OvLjx48iT
K1/OvLnz59CjS59Ovbr169iza9/Ovbv37+DD/osfT768+fPo06tfz769+/fw48ufT7++/fv48+vf
z7+///8ABijggAQWaOCBCCao4IIMNujggxBGKOGEFFZo4YUYZqjhhhx26OGHIIYo4ogklmjiiSim
qOKKLLbo4oswxijjjDTWaOONOOao44489ujjj0AGKeSQRBZp5JFIJqnkkkw26eSTUEYp5ZRUVmnl
lVhmqeWWXHbp5ZdghinmiwmMqWECaJZp5oRpqlkmmms+CGdBapIxZ5wI3kknQXriCSCaCNR5kKAC
9emnfoYiROhAix5aXwIIQNRooZM6yl6bElVKqaXvJfqQpoyCyml3mF4kKqOjkucpRaeimup3/qtO
lGakn7b66nKlaqSnrZveOl2sshoK7KC8+vrbsJICi+yexiKXa0bL9lprs8QF2lGarGZKK7W8YbtR
oMUSG1G03Krm7UbkNpRuuOWOli5D53pU7LvtdhYvRuCWtC679Vp2r6nWprTttP2K9q+p/OoabsIF
K0avQgevtG/DmD2LUcQvTUyxZA9DzLBJ8368MV4dK1pySguPnJjFCIssccgqE3ayQRj/pHHMfOXL
0cw1Lewyzl8Bei3PN737M9BaER3q0TrdjPRakDJt58BWOf00WTVnmvVUPl8t1tbjSl0UvWJ7DZTS
oZpltNlZgV0r2k5ZzXbccMPNdaZz0y21/ttlyZ33UHXbnTTMfwcF7t5le9V14TzZzXdcazOOk+OJ
90245DE9Dq/md70bMOYvI+4Yu5WDPujn35b+ltGqmx644Haxbrq8gW8W+ewtD936XovjHrbYsA/m
t+8m6767YMMTzzLCraVMPJ/AB/9Y8oVzvpD1Bl8u+eu6Of839glJb3vvV4Mf/vEERVDB+pPJDrT5
xIqPUAQU1B9BBJTdvjHlL63vP/6VIV+74Ecz+TXEAhewwPoAGEAB+oqABaRJBS6QwAow0F/ee5XO
0AVBj1RAgResmLZSxT+dqI99nHEfnjaoERaWpH4ROaEFQ5gZ/YWpg9BbSQQmMAEJUOAh/h+0gAIh
ABoHagmHlDLgQepXvx4+5AIYqCANx6c1LpXQJRSoABMlABEMYACEDJkABvF2JSTaSYkMyaIWKcBF
iIBRIRKQQA/FGMAqTumKM1kfG0HCwx62sYF2ZNLyLGJGjjjxI33sYw0zeCTKoY8i94uADz0ygSYe
soaBHJIZXUiSB2TgkxBhIgUmMEWMVJKHf8RkJn2Ex5M84JUPcEAo10iBUpqSh54hGyu5x5JPftIB
snSIGuuXyo3EcY6fId0jITTIihRSIhrQwC8fABE92lIgxyzmQuTYR21qhmzLXJAjZxLNT1LTI3FM
pzcRkkhchkaXZGqlTMwJEjmq8yGV/hzlJd8ZLBbZjZMzcUAGBIrIbq6Tnd1ciCczcBl4mqiQaCQA
ASQCzIoWFJUHTUhGBQJLYFbMiB2qG0BDMgCJThQivhxoMDuCUZCkNJaqDJuHmsmqcJLBpCaFSDlV
+pF7euST0szAK79JujONkyUEmAFOURrUlSaEoRFRZxw/stNzUlGmFRIcGhMyg65KdAAR+eVCgMnT
h9gznR/JgDQfQMRc9pOZR4VJUpV60p9W1KMOSeRUP7LQdxa1QVq1KUMkChKB+hKvDeGmH/kKS6sm
860HMiNNXVJSwlK1qVFdrELI6tSGvNSxufzrgCD6yLo+BKeW7YhaxfqRu3ZWISkV/ipokwlS/JC2
tEs9LV1T2xGBvlYjasXsQ156GmXu55lbHQhqIdLV3bb2rpct529hK1SGCGAA2F2krGxbtmc2ZK65
/a5XCQAqAZg3rCpF7EYcEE0NqHcj2MXudYm6SvdI1ru6dW5EeHuQAPjXvwJ4iGF/Od2LrLbAF4mv
fFMI2UtFjybjVcBHzEvhAOhUuB6JZXU/MgMZzGDBKRTteSarNcEuRKISnjAMKszUsiqkAR2ISGPf
q5EByEAG2E2xvWrLHeSamCGV5a9GBBCDFQvAwhFxQFsT0oAmNxmlxP1IfN213fAE9sffNSlYJ2xe
JHvEyU4eblA37BEFu4vHvwps/krYO1CIEAC7WgYJhUHSgTpz4MkPqaqUK5tdKtc3zR/Bb0Jci+CC
zLWyIPlvAALskTp34M4NQO9sDQKAI3u5IQru85mrnGbEJZcgO6WxQrpaUh0jZNHnfQiFu0znDuDZ
I4oGwKUXQuopm0aFzpHnStrrYoegeCFHtjSjGyIAIx85JK/2SIUDAICH2PjDBGj2QjQtQjLiipcx
0cAGoilqjKz62A4hcgxY/WUwy7nC0naIrRUygOu2e8sf/TNwSCzvl3C70BWBwbjJHW5+J2QBOX0I
mJO9kVXPGr4KHnZMkzWcK+fEsPimSAyKbN50c2QBGMe4aRfiaA0QvODglvKH/tdNX2t3S806ITRI
jHxwjaB2AQ9x9AY+rpFF+xckHcZxu2lb79j4eJnq+yGUCZzoOX9EBSqgK8xj7upIAxneDol1yzNS
a4NxmjaOtOn9anlNg4Q64hJR9KKPPgMVSJQBEaF5QeL7Zoh82+IcKQDJeY5V2JD2JaK8X56li29Q
ut3gIEk6AZZeZi1DHdjo3jPbSWPc5kUPy2QYJjEv3ObNQlfVxp46RgAu5BpnGvP+TsjYIaLgtjNe
xLfWdUv0WEuXphfsZNC3keHu8owDnMMjJ0AB/q55gsia2aQfObU37RBBF+a2NvHfHi97WIiwnCG2
dzNOCc+RDo880bF+iPVL/rp71IDKW5CfC717DhMfbtQivO72RWyP8YcIXqLU58ibD8+Rb/feIFVn
iGEn3b5F3Sv8cAE7xocR2XR+FJF+IMF+8acQSWd2BGBqCBdwypZ4jPVKDsB/7ZM2gxJa3fVpFMFE
mvVcIYF0M5BxECF4C7hEWiR9X7VxQ0aBP5VSsNcYNQOAauFwOqRAFRBKorRP63V5HlF2KoBxaOcR
kbR1zgZnpjdh93cRO1V58XZG4bNIj+cS/gMBEbBkDcF6Pghcrxd4JZiCGSFKrecQpPZVHwFgwOdS
5cRWUcgnioJBVQgTQiREFjRLk7dNXbgQvAaFHcEAJvgR/qNFXUcQzbWE/tMWEcvWhBXhSw21KsKS
Px1IE1AkRRJhgFJ1YdKkfhahgIKog2XoayWFaeFlXYDHWBlwARi4GMuyK5GBfDUBRV90hz2ViQ6B
gAwBY07nEJ4oiIQIEqhFfwlRbCz2EarYWJDBOXNig1vhYzpBQbSITgZlgATBiQMxcNqXdIH4EXoH
jEqIiAphcLR3EKs1dPREgx/zJoyBgybkPyFhUCAxcLsIfUhHhCBBP7UkdB0xAGfogsDGiCrnECml
iuv4Mx6oOHG1E8rXjZTUUh/haJB2gkMohgVxQjxoP4VIEWfYfTGYXsPlS6tIEO5EMkRzkM3ojEBR
hwsUEmfVanWmdhhx/oQZKRDKF4qFJ4wa0YczeI4MkU10JH5KY5KDE2gDaIwJ9EboZIuN9mgweRFk
OJMfZE0gEWQhoZN8pFdy0UHjR5JzWBQVEEVImRAjiU9+tFcf0WQcABJqtEYzSQbWZID66GvLBRLS
9Y7tFIBHI5Rtg3JJEZWFyE3UOBDTGI/m9hF2CEM86BD42Jao5Y8aEUsExUf6tIdnEZTMyDUdeJkn
oVeBSQaceZbY6Iu/+BF5N5OH2HkZMWMhaRFYeYMlqZdXgZJd0U6d6ZkhOGis5RAcYGdNeREWCRI1
OZPg9YCuZ06ryZpjqTZ5qZlQ8XNhcUqoVFiuJXCO1psVsXUM2RFR/mk/zIWaBRGanhVlSYlKPzkW
OASbVZOZZAGdlIkRsTWDvDmPCFFSOJkQpfmJhFibAleYnjVmMwgRtIk1y8mcekOUaRGdbNh8aYdp
9DmKDbGW3EmaKxiPLxlmAsmTetiZARoWlnl87HgWgFmeHBFcA6WF8odT9WkQ27l8RshEFFqh8mlM
PtUQ7KmfTaGV6EkVH4oWn1mc/8lc0AaOCrGQDrGDoSSTLmmdFSFVgQmPW2gBN7qcHjqJbrGhz+WH
HXGaHClMBriYcbkQWcREbSkRTMmSg4lP1Hg/hGikRnGeBMoUzgkXNSqdQBiESpWiFnGfRcp6YwoR
4NmQt6mdRDo2/gMqM4mTo0NhSefnd0yFYR9BnGrJejY5pAqUh+VmoRdllh6hktEYFB0qPDs6Fwiq
EB11nAPRXu71o+rGZ3hKEYM4qQshldAngbkIozFqTO2ZEZUYlj3hpoSBOgqDqFYBkjAlZvdGbBKB
oq3qqpXapw/RiwyhAdWppBOhlJsKjc7qEsDqTEXJoYXKGLE1VGKGpQcha8EWfHC2rK4KqxsxfRRp
ENNaT0waEuqTraGjMA5jJxfzplcRriGRfdp3hup6iS6Kc+/3rvB6Zw4BcWZ1ph6BhRWAhTvxmvwq
FW6iTBWLFSBpoiAHg0DmVerqmAqBpGRndu33XHW6EE4qmitZ/jQGmbF34yrqIqxj8Un2Smyn6GbL
GmQiaxBPebMLgXSDFxLvSZaBihA+hJhbSEGWOBNbeT0wq6PM4jGZMZ1yNnvAiKJAxKchAXBKRbT+
WU9lGZhe1LQZY5lRWxX+ZzJpuxUQZ40XEXry943qqj7NmoDsx4abyLEaQYYiqhCV2KksgTY0y6Hi
kkSd8Z6q2hDmenO4F6R4OJMLMAP7NXjb2JGL+6A9GBFs2hJoW23xAxokSq4bAbC4R594G31miIII
axEMG6lrZKOD+6kLtzSFuxZ897EDKxCoZmnjqBF32rV56xBIZ7KtSxEVFUumOhFb5BOE27ZdISjx
Ar1hUaJA/vZmAtCzBtG7/vW7GEGfQgq82niyxGuy/YZeCtpTBZsTbkq90SstdOK+a1F6Coezlpa1
X7W7EjmRx0sQC1CEDIFqo9ef6dsRMgm0IvG82SMq8psW/Mh29WuKjIhqEcF2aOgRC1CPC5A49mes
1kuaedczn8t4xdfAZvFsc8cR/wUA3nsQ/Ai5wisS3xbB1EW6BsFZULWFXCsTCux9rWLCZXGGjDgR
9jfENyWwqUu+HiF7cqsRAfmglcquKDPCq3Eqt0sXKdyxXdbCBvHAywpjEgGtHSFuFVecRLenUnwS
PfwaP5wa7jZfaZizl0qtAjG5Ydi/FJFqepubzss0V8wX/sjyx22RaTT8giE3x3RMBiR4uR0hwCHB
Xo7aNJZJNbPRxqTBj+62c0VXyBmxAXU2c3QshBgHgVrsuGm1ib3qx0BcF4F8yTeWxTXXvVxcEY7W
dGHcv0ananLcW47IvkozUrhhxaTRYdjVhMPXEALcvUl6q4Zsyg2hb8XoEU9ME2s8b1a8yluRY9OW
roq4bLNcERF5brscjhQnAN/snQhRtE5LxcRhya6hhMeMePdLmJg6xjCQeX/HyWtHqwyxWnzsEtV8
HIGMzWWRafrrsU8lEfIYEhOXyx6BotpLEKObucG6MwR9fOriGsQMyxnxug+xm0yZyG63b0acrDzb
YhS9/q8WfdGGMdCssX3RRqcWxXQVKsN6fLr8LMmqbB3unBocnRHqTNMi7XY2V9IRcZqk7LIrnR0u
7cYgdsoF7BC2rH+M2m/jvBHQpr8qETUW7R09fcnxddMjKl1868QpC2zGdsgdUYoivNTg8dWiQchE
+88c8bb/2dBifaItaBMB/dYOQcmgsdGa3Fp0vRGKO9JNbBDojBDBSBPbyq0sHWIzO8yvPABJ3dFW
+1OhNhGMOJcBy2cxAczkJx5w7Rnx1YS9rImFnZObmNIK0ZhASleXrcbfal/XHBuNtbwCgapwaxGf
VNYut1sRXRAg67m0Kx+ljRqfFRG87dqDdtZYPV7D/r3OXW0fPxzZ1bvclBdxNspZva2REZbKtX0f
rdga/iqvaGWOvbbWi83DO+0f180aG8uS1trPmx0SbE3N7AzfyU0ar5TD0ji2zN3a+O3Z1M1BkVV8
qmGBFyi2GKWfq10QhpWsBn62410grYjdWXFYwKTbAOqQMv2f0j3dI9HXeaLgpvGeHv7hsnuhBDaD
SA3Q+80gTT0ao7viZtWSZrzeDKFfL1PdFALYG0gaB4bjDjGvpxzJEzvjbHLbo1GsepicPemwms3j
k/PeG2IrGi4WBfi3cETl0hyZOs1BWw4dGf4aVppXCfXI0O3eQC4i/V0a7ZSrCKWp9jkRds3Xk4wi
/jWuGnMqtvoUVl/n3liuInEuGq2plhjl5U913zChymUOKyiuGvbE6GNIhrWZu2eL4DMS36jR5bDb
vOjl3JDN6TWi5ajRo77YREJh4p1+6JyR5h40SmfD5DcC65rx5z0FnY3j6jrS56CR6AWVTpb+6JBu
JLiOGXQuEBEgRBLhty0eEkgkyHKS7KShptmpuSAY7bTj1kvi6a4xiNmeRmtU7Cgx7ZH+H+XdGh90
lIKructe4s+b7gJi7Z8BRTqIwCzx2IRE7xg+6aoRuBDA7RLj7VkC7KfxQV/a60JeYmCC6qmhpmms
31I6Juue8Gyp7wl84RZfwgmvg++eOYTLKRc//hoI9D9tTeavAu6hgUCVSvAK0/ANtvIAHxruaOzH
zi0sHx210y8Qb+Y53zAlf21vPjI7XxztWz72fhu2/j4eHxy+yjgyP7W7IVmus/Tm4mm4c/Q+N+/P
Qwb8TjO1sTdT7zpP7xpuWvZbj/VEVehfP4UZ7cMG//bXc/Z+xfF0vzk1bzthny15XxFqL4VXhS59
//d6v/f5MzSGryuIn4xNv/hXR7Wv6OuQ3++NfxheX/nS/tf+LsKBP7Odv/JsD5Rur/n6cvl5cV+m
P7h2zzvdvvqe+ym8gzaiDfsgI/udE/S2b+yt7xZCY+q7T8243xboHvps8/Np0fPBv+SoHzSi/rP8
NtP8J6n40O+pvX+Sul/9tS79UfH7Ma/9SBH4xg+/0DL+i8/1T5H54A+nw5/+dbP+3d/+S4Ft8O/+
1w84hT8u+V//SoH8ra78AEFG4ECCBQ0eRJhQ4UKGDR0+hBhR4kSKFS1exJhR40aOHT1+rJjgYQKR
IE2S7EiypEmWLV2+hBlT5kyaNW3edIgyJ86IOjWq5BlU6FCiRY0eRZq04UqGTJEC5ehU6VSqVa1e
xZq1ptSEPot6zQhV61iyZc2eRZsUbNevay0mQMA17Vy6de3exXtQrsG9McX+7JtX8GDChQ3bdMs3
MMvFPRMfhhxZ8mTKS0fO/Bu28mbOnT0f/m4sMPTFzBhLf0adWvVqtaEfmx6d8zVr2rVt3wY5OvbS
2RLj4gYeXPjwkJfD7m7am/hy5s1pKyfzOySClMidX8eeHbRxiKffWtceXvx4tLplg+8Knfx69u2x
Qp+NHmFc+e7t38ePmDtBktQ3qs8vQAEH9Is770Kqj0AFF2RQIvgA5C3BBieksMKCXItKQgs35JDB
xiQ8sEMRRxwxvu/8IzFFFVXsCz0NV4QxxvH2Qi5EGW/EEb/EdIMwRx9/1I4rFBXqEUgjj2ROqsCK
RLJJJ3GDiz+EbHyySiuFW0nJF6/kskvJSlqJPi/HJBNLlZgsM001t1uzTTffhDNOOeek/rNOO+/E
M0899+SzTz//BDRQQQcltFBDD0U0UUUXZbRRRx+FNFJJJ6W0UksvxTRTTTfltFNPPwU1VFFHJbVU
U09FNVVVV2W1VVdfhTVWWWeltVZbb8U1V1135bVXX38FNlhhhyW2WGOPRTZZZZdltllnn4U2Wmmn
pbZaa6/FNlttt+W2W2+/BTdcccclt1xzz0U3XXXXZbddd9+FN15556W3XnvvxTdfffflt19//wU4
YIEHJrhggw9GOGGFF2a4YYcfhjhiiSemuGKLL8Y4Y4035rhjjz8GOWSRRya5ZJNPRjlllVdmuWWX
X4Y5Zplnprlmm2/GOWedd+a5Z59/GwY6aKGHJrpoo49GOmmll2a6aaefhjpqqTcOCAAh+QQACgAA
ACwAAAAAgALgAYfGcBnamRbWshzEvimjwkuUmWp/f4N+fot/foB+f355j3hqtXBYvHU6u4YdrpgS
qaINm6sCd7IBYLoAYckAg9gAptcAvdoCzuMG4OwY5eAz6uVC6vJJ6utZ7t5q4N55z+5+xPx/0/1/
5/6B9fyH/PaT/umd/t+o/tOw/sqn/rmg/qu05qHmsIjynXv2tnL30nf85XT683Xp9W/Y/HLe/obi
/pbb/qHT/qvl/tj+/v7+/v7+/v7+/v7+/v7+/v7+/v7+/v7+/v7+/v7+/v7+/v7+/v7+/v7+/v7+
/v7+/v7//v7+/v7+/v7+/v7+/v7+/v7+/v7+/v7////+/v7+/v7+/v7+/v7+/v7+/v7+/v7+/v7/
///+/v7+/v7+/v7+/v7+/v7+/v7+/v7+/v7////+/v7+/v7+/v7+/v7+/v7+/v7+/v7+/v7////+
/v7+/v7+/v7+/v7+/v7+/v7+/v7+/v7////+/v7+/v7+/v7+/v7+/v7+/v7+/v7+/v7////+/v7+
/v7+/v7+/v7+/v7+/v7+/v7+/v7////+/v7+/v7+/v7+/v7+/v7+/v7+/v7+/v7////+/v7+/v7+
/v7+/v7+/v7+/v7+/v7+/v7////+/v7+/v7+/v7+/v7+/v7+/v7+/v7+/v7////+/v7+/v7+/v7+
/v7+/v7+/v7+/v7+/v7////+/v7+/v7+/v7+/v7+/v7+/v7+/v7+/v7+/v7////+/v7+/v7+/v7+
/v7+/v7+/v7+/v7+/v7////+/v7+/v7+/v7+/v7+/v7+/v7+/v7+/v7////+/v7+/v7+/v7+/v7+
/v7+/v7+/v7+/v7+/v7////+/v7+/v7+/v7+/v7+/v7+/v7+/v7+/v7+/v7////+/v7+/v7+/v7+
/v7+/v7+/v7+/v7+/v7////+/v7+/v7+/v7+/v7+/v7+/v7+/v7+/v7+/v7+/v7////+/v7+/v7+
/v7+/v7+/v7+/v7+/v7+/v7+/v7+/v7////+/v7+/v7+/v7///8I/gDJCBxIsKDBgwgTKlzIsKHD
hxAjSpxIsaLFixgzatzIsaPHjyBDihxJsqTJkyhTqlzJsqXLlzBjypxJs6bNmzhz6tzJs6fPn0CD
Ch1KtKjRo0iTKl3KtKnTp1CjSp1KtarVq1izat3KtavXr2DDih1LtqzZs2jTql3Ltq3bt3Djyp1L
t67du3jz6t3Lt6/fv4ADCx5MuLDhw4gTK17MuLHjx5AjS55MubLly5gza97MubPnz6BDix5NurTp
06hTq17NurXr17Bjy55Nu7bt27hz697Nu7fv38CDCx9OvLjx48iTK1/OvLnz59CjS59Ovbr169iz
a9/Ovbv37+DD/osfT768+fPo06tfz769+/fw48ufT7++/fv48+vfz7+///8ABijggAQWaOCBCCao
4IIMNujggxBGKOGEFFZo4YUYZqjhhhx26OGHIIYo4ogklmjiiSimqOKKLLbo4oswxijjjDTWaOON
OOao44489ujjj0AGKeSQRBZp5JFIJqnkkkw26eSTUEYp5ZRUVmnllVhmqeWWXHbp5ZdghinmiwmM
qWECaJZp5oRpqlkmmms+CGdBapIxZ5wI3kknQXriCSCaCNR5kKAC9emnfoYiROhAix5aXwIIQNRo
oZM6yl6bElVKqaXvJfqQpoyCyml3mF4kKqOjkucpRaeimup3/qtOlGakn7b66nKlaqSnrZveOl2s
shoK7KC8+vrbsJICi+yexiKXa0bL9lprs8QF2lGarGZKK7W8YbtRoMUSG1G03Krm7UbkNpRuuOWO
li5D53pU7LvtdhYvRuCWtC679Vp2r6nWprTttP2K9q+p/OoabsIFK0avQgevtG/DmD2LUcQvTUyx
ZA9DzLBJ8368MV4dK1pySguPnJjFCIssccgqE3ayQRj/pHHMfOXL0cw1Lewyzl8Bei3PN737M9Ba
ER3q0TrdjPRakDJt58BWOf00WTVnmvVUPl8t1tbjSl0UvWJ7DZTSoZpltNlZgV0r2k5ZzXbccMPN
daZz0y21/ttlyZ33UHXbnTTMfwcF7t5le9V14TzZzXdcazOOk+OJ90245DE9Dq/md70bMOYvI+4Y
u5WDPujn35b+ltGqmx644Haxbrq8gW8W+ewtD936XovjHrbYsA/mt+8m6767YMMTzzLCraVMPJ/A
B/9Y8oVzvpD1Bl8u+eu6Of839glJb3vvV4Mf/vEFRVDB+hyTr7L5xIqfEAUR0F//ZLdvTDlM6/cf
QWXuKxf8aCY/h1jgAhZY3/8AGMBbDZCANanABS5QAfpVzHuv0hm6HvgRCyRwgZlZGNUOtb+dqK8C
IAxhA8WkQY20sCQSoAAFItI/FKZQhXgzEwehtxIJ+NCH/hDxYAJR+JkVYmmHlCogQmQowwlI4CEX
wAACiVhEI06phC5hYhOfCMUpchE0+aMSEu2kxIasT4ZffAj7FiKBCbjRX1oTY/RsQoEKTgAkbnRi
GvFnRSItzyJj5Ej9ZviRPLpxj3zMYZIod7wHZCADEomAJCOAyIxMgAJ5rCT+4likMb5wJA8IZSgj
okUneuSSh+QM6dC3ISyi5JEZGCVEzohJTV4kj54hm4/GGEiHwPKRsnRI/yhgS4v40Il3zGWwcPTH
ivQyIr98gETsyMY3RsSQbaziMmfEyJnA8gEQ+MgPfwgRQ5oSjKSDUSDLCJFQQrKQegTiQ5poTYNt
U0V2/vukTEQZTI5gs5gGQeU53ZXOE61zdwsggEIl8k1pnjKTAD3IQBHiAAdkwAE4DBuJ6qbPjyhU
oQtYAER+GUuHduSQEZ1IRVeK0RDes5W8ZKVAPvpRaH4TJOP8CElbmtFxnambKyHADGZQ05ECM5wJ
cYAGNCCRccqTI0vVwEV5qhnZVUhw7ETIUAmQAJFKxKQUZek1UZpSaC71oki110sbdFCZKgSkIIHl
SssJ0bi+E52ychBW3cqQonokqlOlK0o/4oBQUrWIayVQTLPqkI8m9COArWhE2hhRpTLVqCU9bC4L
OqCDmsSvjaUpAUCyVMkSVqwPISlYQ2NV/7T1JI4d/u1DhErUhRJWqnfliEWnqlmFqPY0q9xPL7Mq
Wtk+ZKsE8GpCBCAAibDUtFCNrE1jmVaEMHd8eb3PXvkqVJpGpLvGPUgAAsBc8o4Ut9DdiGWl2tuF
xHIhzB3AAJqLXY3KZ7F8HQhtFVo25vo3ABCJbHsvEtX0bkS+CKav7RKbHle+BLwg8W95A3xWA6v3
kRGO73w3m130NJNVjO2rbT0Cgxj4t1ilHfBAONAB56K2IzIwsQAGAGBt2nc8w82viJMbXo7AAAYC
qLFHGkBkImP2kSq2iAxmrGAwdhhWZXtmRoobkiCHpMhFTi1uLwqSAMi3NK3VTo5RYlELvxW5PdbI
/njL2+SNdODNWX7IWbnskfnOt82sZbB0tpuS5ya5IMgV1XUhImEre+TNHYizL5HMEPLieSEIlu+j
bexT6uCXJRnY8p8JgtyFrHm8hJawkDmCaCN/BADjRTVEhppg1IS5OQ5eyZzNjJFCj3ohJQayABKn
6I6M99cAOMBDYjwD+d4azE9OzmJlIt2PCEDXhnbIj6P9VolguQHO/u+xFyKDYk96IDNGsCr72C3P
1oTRIImBjBMAgIhQGyEhBS1Dro3tjoh62xmJ9IzVysng8Pkmu10tR2IAZHxjhKaPdUipTW3v8rY7
2+H+NgOT3b296qSwhhX4RgTwcI/WNrkPWXi9/j0SAABI/CIxDrfBL/Pq2uRYpjKcLrp97eiVWwTN
tlp4l1Nt84oIwMRftqciacNIt0rSfueVK8Qn7JGhElW5Dxm5QhI64obcW9jZHgCYyW0ac7OEiZPU
Mnure5Dd5pYhtgaJvDki2oek3dnyJYDWkd3v1QA1ixVEI2bJbhA/P0TdzE1AzycS76pvpLhptq6o
QaLvxFNaUuaKdUtoSUydynXTAyH4uxFCABU4nvOx9ch+DQ9fpnt60A6JtKRdbSspG+a1NKlAAi0I
2Wa7ffDxDulsEf4RNEuk4woBdrCHLQMED57f53MTQS2OExnekCOZrrDaQ98QnIOktiAxeZBT/n3c
bgd9IbvFfGOE1Scd0wV2rsfIMX1IyL+yV+0q+DjUFeJ00h/e/hmxNfAZsnqG+H3B0sIs4xZlISYR
9PRUHVFRGiB+EuF7u/d5BVFH7dcQ1OcRi2dXSMaA4xcr5ucW/6YSEIBApKRFZeVic/UR8QdXHzFJ
khRabWeBDhcSs6aBDuMmldKBagF7LCFJNgQRElhLOjVrIUF1IKFFtNdXDvgRjiYStsdyizIpOKg2
d+cSNQQBfKcQTISACEFZFCZ9H5F786cRNRRzDpGENPdrWAdZdOYvqyIslMF8MSFBCPRB15RSTtWF
a7gQHPBdvNcRFOBBFfR8CQFhFIh/4nVv/iHhSP0UGcuyK4w4hTKBARgAiIJoSfFUgmTwfvOGZY2l
Ap6ngh3hPyFRgaX3X/u3EfxUWI+4OFHYFWOGE1FEQZWofhCFiRBxbcf1cSEhgdPnXQ7xbKbHEJeV
WtE0PR/zJozxgTkRARAwi5aoRyDRAHDWawqRgiDXEHUEEUd3P6L3cRBYEKbYEBV1UcPIEJl2U8n4
MwXoipC4jPXDgyExWB8hjdMYEWGIEEd3hAuhRS3Yjbp4Wi9mjrilcQfRRslEMkSzjoMDhz5RQ1Qk
TtAIEjr3EWDXj/tISxbJEZ0WV0JIjARpEOtni5ZzNArZNgRYkhRxQEPkjMZ0hxLJcB4x/kz6OD/D
xJIWsXYbEVWaCE/yCBcc9GF8oYNEEUUriUdkFY2c+BGyl3c2KRDDJJIOQXUJV3sLSIMPYU5QyY4b
dBivmBRTZJMGeZAO8U9ImZShOHtNORB61xDqQ4Y7BopqaJXzhEmp1BZKg5JXoYxZcZRXmUmLdotv
xgHUuBG8CBIsyI0LQWUgwVJn5090mZVY8ZN4WRVdyRXmNFEMUZfgF5AMIXKGyURFyI8UaIa6tVIP
IJcOcUxQQ5KtSBUvFxaXCZnu9VwhV4+FqI0sOIEbIZNpiVwK4BDSuIeLho7ilFNSyJqvd5JlcYAh
cY4z1xCDCW84uUSiGZOzV3mhFXVm/uleHcmTmhkWdzmZXMOQZfGd7peBvTidBsGbIHFGaWltuOgQ
FXaFBVlPmYmVX4OcMqOXZmFIzTmf6WmIBbGUa+kR9VMBV+aZf5maxomNdCmWXCGZrSkV/HkWEAWh
HZGH8iJ/ahSIDpGND7GN7xkRLGabxdmgCyFQZXVCCLoU4VkYlckW+AmQJ9h0vvmZ9KOb81OREmmi
HRGWEekR/Diik/OiwlOha0FPmLkRGUhrUyagFzGk2MieSCmcRtmToTiGRhGeEwoV6NelQKGi4ohh
XbiTHkF131gRdcSUwnSdsqkQ8cmTWsgRKjl7RGGkyIOkcIFL/seZC6GTTnoRCJem/hMxhmlZk2UZ
nRtBTiEhh3R4NngaGKijMOJ5FeEXqAdRYX+mfSdXEIrph0/pgyXoiwyxAYGpqOqHoh5BiUAxqc6U
fmPBpY6xUxqIqQLxayV3fHbijY2KnR4FUvd4ECWaaFLHEU41pxtxQvTZMwkJpq5pJxfjrFoRfc/Z
cOWlq/VHAL8pTqD5q33YmT6qEErVmAkRlowak/5DpCijjpUamQH4NpRRYR9ZaxdYhnA5iFCaPofp
cRwKnMUqrn6aEHUFEkK0PsuaMew6PXwCr5eBViFxAMAYZKeoETymex9anTaKfXYVsBKFpQoRQ5gE
RVL0qDIBlASjsAt7PdIqFrRZ/mXB2BGfuhBU2nv5WhHUWq0bcYllZQGSSLIusUOwujo0YzIrOxZN
ipoMoX26yof9yhAE6quip54YIWChmYUPcUAP2RJo067gKS5J5BnRx15IG3yoBgCq5hEHgGbbakYe
2osWS5UayhFG+KYqIassl3yi0YS+tn0ld321FawZgaYP6FghUaMUmXdLWqT66VIEFLR9UWB/Fmnu
pm0ioa2j6FiA66lolrkW0bJVS7f6wjRcexaCEi9Fqxa2mmD79hAIEI7eWrMTIVqcy2kbaXkcmxGD
pK4oAbSjixY2WDyvoXqdCo4vq3gSEbMbEX9/u2qwSwb+RYzoNbYCu682sbWn/ku6w3K9cnEAMrBk
/QcRfetpqFZyw6tf38p2yDW7FLFmQVa+mYheu4ixmWO37uIQvVsXKSdfE5t/fLu/B5G2TdsRnniN
S7d5CaGpDuFI5JoQlKe7H2G9qdGIreG9Szu5/7VqtXumUnsRhea+AuEAB0sQomSrA/G0oAtI9Gsu
6qK9b6FhIAGxrvuACne8wKq+E/FzulbBxPhN4pd3JwxiO8PCc9EqQrwW+jZ3MBiD87idb0nAJKZr
/nsRqjWvzBrERHcq99vC4bZhVabDtxinDKG892pvXvwQlgVMPcG7IyQbRGwaEOu9XOwRZptqHhx1
pwqTiZm+O8dm/0ldOwHB/ruBLEVsFjFGwTsHbPOooA4xwDZ8w/VKWGRaNErTUbiBxabhvSe3xRIh
alFsEROZYahndY/cEacpStUruoOcpyssG0cMETCsxB/RAYIpEtrmvrlWvBrxS6pYsik8HG0MG6qH
xL8Ywx0BxhzhaBf8ENPGcQwhuDsMTFQculasHIKcym0xA3AszLfXEJH8xUy8ESWWzG43vDzGY2KH
xloLyLCmLq+RADFQfDS2mIwJmLKMqhdxy3UMEbKbdODEEtZrzaODxQCtFqyWz6nluQo3jf8KzqHc
jaSawNH8wOr8K/bbGl62ukGodBDxyUsXEtnayOkcxAP9hgKtGq0MtyRc/hD1TMvXatBlqLGT46oo
7B2/fBrBzJFjV7g4i3ajDLMgva4iHR41XRoCsGThJhLkWLgIjXbhjMuBK5WnPM045hBrDEbvzGTy
fLtSHL0RAXgNzXbn+xIyDWIjnT2rTNTea44U8X/u54UQIWM9t8EHgbwrQcl112AVLRuFVVISoZNx
qxF+Lb2DmFBv+9IPXbesWdYRXNKwkYoRTRCAKtgI4dYaHNZ5XFtru7uRGh9DzRo71dcpptN/TbGb
y4eESjtSTR9ErNhn8dkMJdlhpdUXobaN08uP0tmp4Zz9jFPnqmXoqXbL2zSo/B+r3RqwFMItqarC
qLdRmxO8y9q5IcGr/lFmsB1QlxgRgT2Ehz2/qd1ZeY0abH1SfElho02xpPiztt1ZxX0arv1QHlua
gaXP+4yw3Z0guJ23XG2UyKpeS33ZhOvP6a0g1WwakYXcFUFZP2wQtBoR2Qrg9Q0hVT20pQG/vK3c
uTyDDdi8G5TYGTLgsuGfY/XeOUnhtf3gFtJ6sXHdIR6kcVnbHP4hjQjdZBGbK77fGqHAwm3iHXLf
p0HjY2XjGTHC1U2pGxThMM7YqyFQGGqs3XpksTTkrzrcLMLjpIFNIXGsMndRjz0SqCzj5UHlowHi
FMlEiasQDzBnWx4Sm00m9uvlXXGJS54Rc8tQUrWImr24NILipuHj/ujqw0Ix0TYi3VU+o0pZQQlO
Es+9S98d5g8qEj+ko5Is5UDi4aJh5RXe21G94UYC5qrhQRNB5mWOsJK+6ZxuGjyYtRdrtTTxz02y
3q1RQxk5paoOE0iUxRci6KtRsKjuoMR06FrT5VVS6qFBlD77EEBeEmP9qlki7J8Ri+vj6/oS1FtC
6agBiH8OKUT+JXp+GjxIPy36x2vuJbhOGnmHdDme7XHi6qOxlAqkuDvDKeMOGirZ7lWs6ami7p8x
71CLsEZ+1/e+6KCxprwM7NyC79BRO/2y7c/B6hQT78o26iNj8MSR6E/j8MAR4EAj8YEc7mbT7ylb
bnvjOszePIjj/uab3ua3Ueu2ziXJLoBsfC0eDzoaz3qsGfOzY/GkofLPA/Dhs9jSvvM8D7zZ8+JA
f2PXA0YtT3FFHxE2v/JgwVEmPybREvUuOjRL/+7szIZEf/XogvKrqONcH61BjxgMH/Yi0SpJ/xdC
g+5mj+gj3zmA3vYgM/Z6EVNyr7Ve3xdzdPc/+ym8gzZ2zfcnofDnR/CCz8t575PYvpWHXzR+74Fl
3/iOT/exKjqSX+JZj71Wf/k2Q/kRavmcfzaJz46GH/pBgfOuufgKY/OmrxNNPzib3/pJMfNNEfmy
P/uP76V1c/temvtMwT28r/ujPzZpLynFH/xIQfinj/DIXzUn/mszJd/8sO/5q1760p80vh/p13L9
XTv83P3z3B80b+/2onv84e+umZ/OoH/+UnjWEqM77A812U/+2x//djn/Eh399g/53q8w8L//AEFG
4ECCBQ0eRJhQ4UKGDR0mTPAw4sOGCSxSbIhgIkaOHT1+BBlS5EiSJU2eRJlS5UqWLV2e3MgwJsiL
Ji3OfJlT506ePX3+BBpU6FCiNRlqpIkAJk6iTZ0+hRpV6lSqVW1K5HhzqVWuXb1+BRtW7NiCTBGa
NajVplGybd2+hRtX7ly2CuumPakR7Vy+ff3+BRx45N6yBy0qLXlX8GLGjR0/fkuY4Ea1iSVDxpxZ
82bOKhUb/v78sXJn0qVNn0YN0eFliaxTv4YdW3bkioNDz8adW/fuqLfJuAaNmPdw4sWN89wLvPBx
5s2dPxetGuNo6NWtX3f+2TV17N29f8fNVLhd5eDNn0cvGCdh3+ndv4dPd7xZ7vHt38dPlnLa8vn9
/wfwp4k20itAAw9EsKib2kuwQQcfJKk/CCeksEILL8QwQw035LBDDz8EMUQRRySxRBNPRDFFFVdk
sUUXX4QxRhlnpLFGG2/EMUcdd+SxRx9/BDJIIYckskgjj0QySSWXZLJJJ5+EMkopp6SySiuvxDJL
LbfksksvvwQzTDHHJLNMM89EM00112SzTTffhDNOOeekvbNOO+/EM0899+SzTz//BDRQQQcltFBD
D0U0UUUXZbRRRx+FNFJJJ6W0UksvxTRTTTfltFNPPwU1VFFHJbVUU09FNVVVV2W1VVdfhTVWWWel
tVZbb8U1V1135bVXX38FNlhhhyW2WGOPRTZZZZdltllnn4U2WmmnpbZaa6/FNlttt+W2W2+/BTdc
ccclt1xzz0U3XXXXZbddd9+FN15556W3XnvvxTdfffflt19//wU4YIEHJrhggw9G+NeAAAAh+QQA
CgAAACwAAAAAgALgAYfGcBnamRbWshzEvimjwkuUmWp/f4N+fot/foB+f355j3hqtXBYvHU6u4Yd
rpgSqaINm6sCd7IBYLoAYckAg9gAptcAvdoCzuMG4OwY5eAz6uVC6vJJ6utZ7t5q4N55z+5+xPx/
0/1/5/6B9fyH/PaT/umd/t+o/tOw/sqn/rmg/qu05qHmsIjynXv2tnL30nf85XT683Xp9W/Y/HLe
/obi/pbb/qHT/qvl/tj+/v7+/v7+/v7+/v7+/v7+/v7+/v7+/v7+/v7+/v7+/v7+/v7+/v7+/v7+
/v7+/v7+/v7//v7+/v7+/v7+/v7+/v7+/v7+/v7+/v7////+/v7+/v7+/v7+/v7+/v7+/v7+/v7+
/v7////+/v7+/v7+/v7+/v7+/v7+/v7+/v7+/v7////+/v7+/v7+/v7+/v7+/v7+/v7+/v7+/v7/
///+/v7+/v7+/v7+/v7+/v7+/v7+/v7+/v7////+/v7+/v7+/v7+/v7+/v7+/v7+/v7+/v7////+
/v7+/v7+/v7+/v7+/v7+/v7+/v7+/v7////+/v7+/v7+/v7+/v7+/v7+/v7+/v7+/v7////+/v7+
/v7+/v7+/v7+/v7+/v7+/v7+/v7////+/v7+/v7+/v7+/v7+/v7+/v7+/v7+/v7////+/v7+/v7+
/v7+/v7+/v7+/v7+/v7+/v7////+/v7+/v7+/v7+/v7+/v7+/v7+/v7+/v7+/v7////+/v7+/v7+
/v7+/v7+/v7+/v7+/v7+/v7////+/v7+/v7+/v7+/v7+/v7+/v7+/v7+/v7////+/v7+/v7+/v7+
/v7+/v7+/v7+/v7+/v7+/v7////+/v7+/v7+/v7+/v7+/v7+/v7+/v7+/v7+/v7////+/v7+/v7+
/v7+/v7+/v7+/v7+/v7+/v7////+/v7+/v7+/v7+/v7+/v7+/v7+/v7+/v7+/v7+/v7////+/v7+
/v7+/v7+/v7+/v7+/v7+/v7+/v7+/v7+/v7////+/v7+/v7+/v7///8I/gDJCBxIsKDBgwgTKlzI
sKHDhxAjSpxIsaLFixgzatzIsaPHjyBDihxJsqTJkyhTqlzJsqXLlzBjypxJs6bNmzhz6tzJs6fP
n0CDCh1KtKjRo0iTKl3KtKnTp1CjSp1KtarVq1izat3KtavXr2DDih1LtqzZs2jTql3Ltq3bt3Dj
yp1Lt67du3jz6t3Lt6/fv4ADCx5MuLDhw4gTK17MuLHjx5AjS55MubLly5gza97MubPnz6BDix5N
urTp06hTq17NurXr17Bjy55Nu7bt27hz697Nu7fv38CDCx9OvLjx48iTK1/OvLnz59CjS59Ovbr1
69iza9/Ovbv37+DD/osfT768+fPo06tfz769+/fw48ufT7++/fv48+vfz7+///8ABijggAQWaOCB
CCao4IIMNujggxBGKOGEFFZo4YUYZqjhhhx26OGHIIYo4ogklmjiiSimqOKKLLbo4oswxijjjDTW
aOONOOao44489ujjj0AGKeSQRBZp5JFIJqnkkkw26eSTUEYp5ZRUVmnllVhmqeWWXHbp5Zdghinm
iwmMqWECaJZp5oRpqlkmmms+CGdBapIxZ5wI3kknQXriCSCaCNR5kKAC9emnfoYiROhAix5aXwII
QNRooZM6yl6bElVKqaXvJfqQpoyCyml3mF4kKqOjkucpRaeimup3/qtOlGakn7b66nKlaqSnrZve
Ol2sshoK7KC8+vrbsJICi+yexiKXa0bL9lprs8QF2lGarGZKK7W8YbtRoMUSG1G03Krm7UbkNpRu
uOWOli5D53pU7LvtdhYvRuCWtC679Vp2r6nWprTttP2K9q+p/OoabsIFK0avQgevtG/DmD2LUcQv
TUyxZA9DzLBJ8368MV4dK1pySguPnJjFCIssccgqE3ayQRj/pHHMfOXL0cw1Lewyzl8Bei3PN737
M9BaER3q0TrdjPRakDJt58BWOf00WTVnmvVUPl8t1tbjSl0UvWJ7DZTSoZpltNlZgV0r2k5ZzXbc
cMPNdaZz0y21/ttlyZ33UHXbnTTMfwcF7t5le9V14TzZzXdcazOOk+OJ90245DE9Dq/md70bMOYv
I+4Yu5WDPujn35b+ltGqmx644Haxbrq8gW8W+ewtD936XovjHrbYsA/mt+8m6767YMMTzzLCraVM
PJ/AB/9Y8oVzvpD1Bl8u+eu6Of839glJb3vvV4Mf/vEGRVBBBRyTr7L5xIqvEAUR1B8BBe3j/X70
Ma3vfwSUcV+54Ecz+T3EAhb4X2Vkxy0CFtAmFsBAAvF3mdu9SmfociBIEFgBCWhmYVQ7FOV6or4K
APCDAhwTBjWywpJIgAIUmEBE/GfCE6JQf2PSIPRWMoEeSkAC/jI8IAdN6JkUZkmHlDIgQmDIRA8+
5AISXJ8NOcNALY0QJhSoQBMhYoELXICIobEglZBoJyU2JIswnIATIQLGhAAxiAvU2hj5Z5MteuSH
eITjZKq4pOVZhIwceSEF1siRHhqSkAH0HpIot7sHXCADD5DIBGKoRkRmZJKH/KAci0TGFo7kAaAE
ZUSYCMMpagSTPrRdsIR0RZRk4JWvjCQb11fKj2SSiqTzERkB6RBYxlIitFTjR96oR1Vu0kZ+rAgv
I/LKCFxAlqMspkHeKEkf/vAzZENfgxhJk18OE4+WXIghUwkassEIkGZ8CCghmQFbVvKaD0kjOcO4
yhXZzZMc/lnADAgwkWeG8o7jhKdDJknJcNorlydCZ+sWwFCGRuSRsBRlRwJaTWkWxAEa0MANw0ai
uuHzIwQIaUgXABGIetMj1vyIA1a6UmNytEPJZJU2yUAAFahApCSFSDMhCRIgCpQjr2SpA8YnqzNx
cyUzSGpIJ3LSg2BUA0ONCDh/mpGnaiADLcXlMdlUtnQi5KYEMOhFhJrVhwRUrBXJ6FWjWsR6yumo
MVnqR9SaUbYO9JBopYhay1pEhDJIcF5dCEMJ4FCP0NUBeTUIXkHigFeShnQzBc8ul0lTfkpEpITN
KUcOa1eH+JQhGpWIAx7A0sf6VUAKJckCRmrZh8wArIRV/ilUO7uRlWK1nTqFJV/DaET8KHR3mI0t
RJQqV48IlbFCPYBOr4pV2tJzq/fhZToJsE+RRkQFSkVrAAQggABEhKzOvUgG1NpciGQ0qKkxZ3S7
GljqVlezECGAAhTCXe4GwLsPoStWDUve8CpkrQsZgAAEfFDoumeygSUIcRWg3I7U177m3WtiJ7JX
/1pkABgW8AAa7NJkdYqOcW2tR2AQg/riN791tbBFZguS+mJYANg8rXliGqzIKmS11vWIAGIAg/py
2CG7PUgDOtAB0R7XIzIo8YBP3FcDwwqwNl4IZgv7Ee6GpAFYxjJEGttcB/xYI0mWwYAfW9TwQHl3
jo1v/nBBst3ugiTLWn7IeJmr4oqIeQCm4WN2pHs825I2vsQVMUKsDJEH39cjQyZylr/8XzqDRMN4
zrNbrXNmV3a5zgp+L6MHct/6FtrQHyFyB+KM4vJ6JMMCDsGmY1zmX73Oxr7cr5rhexBDw9ghJDZx
qBXdgInUGQDdZXJDXExg1OiZOa1kyXmxCk2OPNjNDtlxj7m76otgmQNsvi8AABAAEVS7IEke8ACE
LWkcKgfBMRkvej8SAyVD+yGEFmxxHQLnXus42AEAAETCjGGGCPjWWn1pcWg8aZnI+iMknva3K4JT
Wi+k3vZ2tn3zHZE7+/vFeF44xwrum0rb5AEZeGZI/jwNkuA6HCGJHjWWNR4RUH/k3xmuAavNvRs+
5ySU//xImwHOEffi9CGiJrWDu6vvKsvgzpEuZ29jw+coy9mXzd6IocmdkUCDgOVkCHrEO9Jmqmdk
xyUutsFaTRtGRlaQplyIL5+p8at+WtcfeS9IcCzohdxX293G+r4tXppjsya1LLGf/Z4eSwgsxLZB
TkiuIQzSefd8tYOF94OL7pEAaNjYHDd29JwuEFLSDyIgjzpCLo1pMkib2g1xvJRHenKMmFzVw578
yzM8Zr1XUMZ9T7ZLaFlL4y478YOOt7xVnxCTe4S6P4/2tL2OEUhjOATptRVlDfNbmmRRi4MECXkl
/lD6iEy57gfx+Ug9klS5S575BOH2ocnAcgGIWdx/v96cOF8Xgmc+Jnac63m77/0pO8Tqtvd/+9R6
GHF3+QYAMOAQA9BuA8ZzCYFRuEVUdNIn9CcXsDN9GPFGQBQSjcV/ERFoBFgQyCdcIDUDI2di6GcQ
3NVvDEFWbSUtzIJL7FWBDEFQlYRcpRV3CwYSaPQQg0VY4IcRhkZ5hqVbHtgYNUODUDODP+F5wuQR
QZWDx0d8GkE/g5d6UwZ7EmdfRMgRVmVqG7UqSngW1dcS6pNAFxBPpDRhFLZ/R+gQOBaCFsF7n8cQ
NZV8lUd0ItFfEsgniuIvcNUSNFQ/EMFET7gQ/j5lUQixfW9oh2vWEdeHfWl3EEkFVnJYEcAGbQGI
YsAHGRgjLIn0EQmGEAjEQRAwiQkRQxM2VSjGYg0xZFu3epj1ERUwQRTUEMRVNgZ4XyKAXLcFiA6x
K5FRhjMBRReQQIYHEtZEVYdXevUmgHjYEbTkfZcoEHQXhCrocip1ZMPIQGO4FTaHExgQRaiYgXjF
hhIBcamXiyGxPiXXcO2njR3BZVHoiR/zJozhcTpxjOV4SSn1ESmXZQ9BhQdRQre4EPVjhY3nfwwx
hEDmdr30e42oF0Qzil1BjDtxPybEPiHxj7umciAhePdzRkxEiB0hfthYaw6oEC7oEL9nVj1E/pEV
+Y1cE44/4T91+E14JBK8xoOk1I+dh5M5yRHEVY2+FoX8t24NwYr1pzQWOTiiiIG0OERt1BFThY7p
yAFCxxFCCZQCIZRYOVwkyF/715EUZYEz+ZRYgZFD4UUTZJYe2RHq6BG1iH0TVpdDeZIEiRFfOJE1
OE6KmBZOSZNSYZNH4ZZV6UaGBBFnBRIcoJUCSYta5JUDAUPoWEID2VALsIkuWVciYYOHyBaDeRj6
qBRStJTgFJiKdUstmFEQoXWx+BMJaZKymGPbeHDKqIptoUFS+TVQBhaAiZWf1RDg5RBaFxL3k5cb
8ZNeWVOwhYNSOEyLqRajWRhNJxbBGRJG/th9ikaZZEB3DlFKV8gRkdh7CiF+RikRseaX4rRYalOd
MsOEZCFPodkR/cWexcd6KVmZ2KecGcFBltkQNrWXBYFloxaRjqaMZzkWg0mYT2GYZVFQIhEBbviO
0ZgQXTmVk/lmz9iaCbqUMTlQlFSfinM0alk1pXkWxDQSZQkSINgQeJl9IRmWEDGXDKFu3ceUNShP
6JhFD5qW1imfa3GVIgGB+IkQB1B+ITVfZ6RFPcqRDpGcB8kRogaZIUGkDcGaDKGRI6kU8Ik8v/kW
2QmdnYgRSpWeEZGQ/nkQVkibHSFqICmd7ukRBrmmZ/OlgHGdcYFKJLoR9ykSBGoRzEmS/iUJEkSm
lZ85p9JIld5ZNCZ6olRxgQ7qE6A5YU8VEZw1d5C3WpIpiQxRnjKKaA2AqHDJjBtRAYg5pTbzqPEp
pHWhpQ/IjQ0RARuQYg2xXf13oRoRo5SJl40aETaqkyPRRQn0q5mDp3+BOgoDqVuBlPxnqwzBbcE2
kLCFpg/hq2w4jQO5nwQxqnB2peA0Eqf5E8qqTL0ZFg36GHO2Vkc6aHfHbQ2RpEXpk6qaT7PIEFW6
lRtxlTT6EPVTQ40zkw5jJxczqVvBhy3mkNBorRAhpRY6fgzBAccpp+8EEjSUmD3zM+eqNjD4NpVR
YSAhAs+WggYxljdmm1sqePXqesaH/q9xSpwdCJM3uEGIibHHqjDT44fByKxnEZ0c0WCyt5CZFZ4/
qYPVxa0UUZxZGpcKAUSU5BAVMI4JBKXHKrCeGIPnsxkteYJd2HMMyRAZqoMQC4XMhZsTZU2qSRBQ
VKxVm0EGmzQ0YzJvOxbOGhLqt34dEQLYpasIEaP96hBjS5YAZkuk1KcJkYwZwzQ8y6DikkSfYVWu
qHPvSrIRoVzYZX4wuqFzd69k26Ie4YR/yxLpWkHnM7dokakBtpIMsXN6+BEDyrBqhrQC0bL6Z7aQ
iH1pOxM6tLhkGD+86xYguxDiNmYPMW1cGBIouxHKFYeyG1yy62sxKxJp1BNo87u9/rs0OjsamIZq
YscQymViXasRP8ipU8i3lBhoZNquB/FD9JO7LbG71osWbjIp8ZsXD/ZiLScA4VsQ0oqr22q+F+G8
roW5HbGeIZFG46m7imu67ykqDBwXBxACYQZ/2aZtDxECI2iyGqGkgUoQgZsQB7BzraiUkOh5oUs7
j/rA17s5r8GA45aw4BuvZMDBsIuLBMwRO4e3aoewDAFyEfipdHjCGbQzKkydrVLEb7FkJxjDA9zB
DOfEE/Fsqjt6g9vDOHettCTEBZvCzaMuSMwWw5t0yisCPbZ8l2WUsdkQzNtixjvFGOHDISdRJKnF
f7TATBeMq8G9bvx17yaqkRmv/rTrYAzYx0C1dqI3OXY8G8hSv3Dhfi62xxexXTrMEcFam1AsETAw
bSEBxzy1E/AbQrJxxKYRwWBHwZJ7gJRbuYf6xwzBwc8LEUArfFD4SiKXE9X7xTKpLqjhwin4bxKR
icG2vxcBm8N1wxtxd9O6ySCHyEfzUbhxKrhcFoyXELQnxreqsG/Kax4IxbLckPI4j6F3yC5xy8Ox
yNH8Fnr8EAdAxt9MpaOmvgURwl1XaG0MEj4MSvBcx1xsHKIcG/f7wvmbyhPRoVWGgvA2yJA8ENYa
a3IsuomcHOYMGzuGdByobulI0EMHd7imZMKs0JpJeE2FMuTsHND8GsoVbgBt/lxbG6/EzG7uJtAC
QcgHcQCaSWUNoW6dLNJEfM75CM08rRYY1tHihZQR0dIjxmPcJdQVoU8fnVuICzIjTR39zBphrH0v
+Zq8lsYaQXIgYVMq0FCevMA/nT8srBp6bM0a8adFfaAgIc9c7RELYFMzYNM0ETVE7B1TfRru934p
bZ9VLFuhlb/2ldBLPdc1PBK3PNaZkdelwQCDjNa15bNeKKvR1s4bAZ51/dDi0SqgDBonHXYwvWUr
DVSjzRCLJ9MZQdM1LRPlaq6KPXPyhxoYloJc1oazlc8DQV62uxAJl9QPq8ECg6znwdivUdqgFbxk
CYbF280GMVjk61p7C9xQ/u228BHRsLGdHkih0JrcDmCsPrjaEIFdlqgS8PsoePwa63mEe1Wku70R
Jmetr6vTQ2wfR/zaZZEBFErCNEFWP0yUAzq01HgS8Gvfr7EsBE63a/XUVrmT6mncGeFeA9g0mr0f
9e0atgWu4YqpPHx8N3XYiD26f0LcpuHgGHGOEoG6H0HTN2UTUU0gIj4a2O1OTNsQGw7XTQ0TA54g
Bn7gB6vWZzvjQFZntS0RcUjXL3PX23TeI67d7e2PphrZo3WE6Onh+kzdEGLdpYHcd5SI2slsDY2L
/03lMoXkFNLZcXsamOa+66ujBWzA14VdRi4SOY4hWP4aGqjmBBGcdHwQ/r8nzlIm5h423xsifbDR
mBFh6B+B034uE3PuITvuGoBpuAmB6Ine5Dcr6CLy4qYxpoc+Tx+xTl/etgpj5h9S56hRqSIhSBSB
c6Hu0BOOIpo+GrC64INEo7GW0+O80+ek5Khx5wdcUGHJ0IuuL6w6IxV+GpROniasnhH1vsK967wu
65xeSLwn6QoR0gL+6jRi4Js+onguEWgUqtQL4jsS65yBSnu+ROIu4dpe7j5dGp6+5TNry2JtJOaO
GrVIESP65Inb7kHC7a/xrzYrTsue2brOJMfOGoPo3YWb7rmD6U0C8KtRiuNaiPnn7PU+RtF+Gm7J
tpK07irR2nV8RBtf/hrG6PFCkfFW9O6pMUQpDynLCiaEfhpq2qUBW+xiIvGk0Z9uishWHicJLxoX
693ZrricovOgQawVb/A/f/Q7K/THqLmMDvMQnyr3jhnuOPUq3yxBHx210y8zDx2JvTFIf27+DvZP
D9HkjjNlHxxrXz5pDxzlzTikjrXdUzeuc/WuwT2z0/WhPPbPI/JnrsjXUveuE/fNM5iGjzttn3tn
/zzZez3Rd/CQX/KNmz37XPkCJ/nYJPjZovkWsfhlFHDo4vmg78WfoklkfvoXY/nT8/asbyqIPzot
HvurDzGvT/m2DxKczeMBK/pe7PsDpPckU/u7DzKunxeTdfzvO/sU/kk7zJ8xqS+TTOPM0Y8SYd+U
un/9OO73u0n1OMv9RTP937/14s/i5C+YonP+AZv8QbP+7O8TxH8VXx//Z+P84Aj49v/y7l+Y4A8t
AJEAARmCBQ0eRJhQ4UKGDR0+hBhR4kSKFS1exJhR40aOHT1+BBmS4MCHCUSe3JjApEeVKF2+hBlT
5kyaNW3exMkSYsucMnlyVLmy51CiRY0eRZpU6U2hDpsuxRj041OoVa1exZpV61aLVBd65ZrwJ9Cx
Yc2eRZtW7VqNZb+CDSsQbkW5bO3exZtXr9a5B/talcry717ChQ0fRkw3oturjKM6ThxZ8mTKhCEj
HFz0MsXAlT1//gYdOu5iwJs5i0adWvXqnpnJmLYJW2Jn1rVt38Z9UbZrmLTbIuCdW/hw4qkzBw/p
uy3y4s2dPz8MW3byqdOhX8eena1r5o+7f9UeXvx4vNx7Wy+Jnvx69u1x7v7uNL5Y9e7t38d/0rzg
+QiB5wcwQAF9Ii2l/vyqb0AFF2SQPoj+042kjhJssEILF9xvNgoV2vBCDz+8L8OGlMuIRBBPRJFB
+Eb8CLgDU4QxxutELEglCQ2UMUcdFczQRN1e3DFIIW2DD0iCfBwySSVn3EmwJZ+EMrzBDkQySiuv
JLKv+GzEsksviZvrOyO/JLPMu+BCrkoz12QTMce467BNOec8/surG9+iM089I6NKyzH3BDRQowQy
CCw1BUU0Ub5qxOxPRR+FdKaVhHIxUksv3SqoQzHltNPWPAU1VFFHJbVUU09FNVVVV2W1VVdfhTVW
WWeltVZbb8U1V1135bVXX38FNlhhhyW2WGOPRTZZZZdltllnn4U2WmmnpbZaa6/FNlttt+W2W2+/
BTdcccclt1xzz0U3XXXXZbddd9+FN15556W3XnvvxTdfffflt19//wU4YIEHJrhggw9GOGGFF2a4
YYcfhjhiiSemuGKLL8Y4Y4035rhjjz8GOWSRRya5ZJNPRjlllVdmuWWXX4Y5Zplnprlmm2/GOWed
d+a5Z59/UQY6aKGHJrpoo49GOmmll2a6aaefhjpqqaemumqrr8Y6a6235rprr78GO2yxxya7bLPP
Rjtttddmu22334Y7brnnprtuu+/GO2+99+a7720DAgAh+QQACgAAACwAAAAAgALgAYfGcBnamRbW
shzEvimjwkuUmWp/f4N+fot/foB+f355j3hqtXBYvHU6u4YdrpgSqaINm6sCd7IBYLoAYckAg9gA
ptcAvdoCzuMG4OwY5eAz6uVC6vJJ6utZ7t5q4N55z+5+xPx/0/1/5/6B9fyH/PaT/umd/t+o/tOw
/sqn/rmg/qu05qHmsIjynXv2tnL30nf85XT683Xp9W/Y/HLe/obi/pbb/qHT/qvl/tj+/v7+/v7+
/v7+/v7+/v7+/v7+/v7+/v7+/v7+/v7+/v7+/v7+/v7+/v7+/v7+/v7+/v7//v7+/v7+/v7+/v7+
/v7+/v7+/v7+/v7////+/v7+/v7+/v7+/v7+/v7+/v7+/v7+/v7////+/v7+/v7+/v7+/v7+/v7+
/v7+/v7+/v7////+/v7+/v7+/v7+/v7+/v7+/v7+/v7+/v7////+/v7+/v7+/v7+/v7+/v7+/v7+
/v7+/v7////+/v7+/v7+/v7+/v7+/v7+/v7+/v7+/v7////+/v7+/v7+/v7+/v7+/v7+/v7+/v7+
/v7////+/v7+/v7+/v7+/v7+/v7+/v7+/v7+/v7////+/v7+/v7+/v7+/v7+/v7+/v7+/v7+/v7/
///+/v7+/v7+/v7+/v7+/v7+/v7+/v7+/v7////+/v7+/v7+/v7+/v7+/v7+/v7+/v7+/v7////+
/v7+/v7+/v7+/v7+/v7+/v7+/v7+/v7+/v7////+/v7+/v7+/v7+/v7+/v7+/v7+/v7+/v7////+
/v7+/v7+/v7+/v7+/v7+/v7+/v7+/v7////+/v7+/v7+/v7+/v7+/v7+/v7+/v7+/v7+/v7////+
/v7+/v7+/v7+/v7+/v7+/v7+/v7+/v7+/v7////+/v7+/v7+/v7+/v7+/v7+/v7+/v7+/v7////+
/v7+/v7+/v7+/v7+/v7+/v7+/v7+/v7+/v7+/v7////+/v7+/v7+/v7+/v7+/v7+/v7+/v7+/v7+
/v7+/v7////+/v7+/v7+/v7///8I/gDJCBxIsKDBgwgTKlzIsKHDhxAjSpxIsaLFixgzatzIsaPH
jyBDihxJsqTJkyhTqlzJsqXLlzBjypxJs6bNmzhz6tzJs6fPn0CDCh1KtKjRo0iTKl3KtKnTp1Cj
Sp1KtarVq1izat3KtavXr2DDih1LtqzZs2jTql3Ltq3bt3Djyp1Lt67du3jz6t3Lt6/fv4ADCx5M
uLDhw4gTK17MuLHjx5AjS55MubLly5gza97MubPnz6BDix5NurTp06hTq17NurXr17Bjy55Nu7bt
27hz697Nu7fv38CDCx9OvLjx48iTK1/OvLnz59CjS59Ovbr169iza9/Ovbv37+DD/osfT768+fPo
06tfz769+/fw48ufT7++/fv48+vfz7+///8ABijggAQWaOCBCCao4IIMNujggxBGKOGEFFZo4YUY
Zqjhhhx26OGHIIYo4ogklmjiiSimqOKKLLbo4oswxijjjDTWaOONOOao44489ujjj0AGKeSQRBZp
5JFIJqnkkkw26eSTUEYp5ZRUVmnllVhmqeWWXHbp5ZdghinmiwmMqWECaJZp5oRpqlkmmms+CGdB
apIxZ5wI3kknQXriCSCaCNR5kKAC9emnfoYiROhAix5aXwIIQNRooZM6yl6bElVKqaXvJfqQpoyC
yml3mF4kKqOjkucpRaeimup3/qtOlGakn7b66nKlaqSnrZveOl2sshoK7KC8+vrbsJICi+yexiKX
a0bL9lprs8QF2lGarGZKK7W8YbtRoMUSG1G03Krm7UbkNpRuuOWOli5D53pU7LvtdhYvRuCWtC67
9Vp2r6nWprTttP2K9q+p/OoabsIFK0avQgevtG/DmD2LUcQvTUyxZA9DzLBJ8368MV4dK1pySguP
nJjFCIssccgqE3ayQRj/pHHMfOXL0cw1Lewyzl8Bei3PN737M9BaER3q0TrdjPRakDJt58BWOf00
WTVnmvVUPl8t1tbjSl0UvWJ7DZTSoZpltNlZgV0r2k5ZzXbccMPNdaZz0y21/ttlyZ33UHXbnTTM
fwcF7t5le9V14TzZzXdcazOOk+OJ90245DE9Dq/md70bMOYvI+4Yu5WDPujn35b+ltGqmx644Hax
brq8gW8W+ewtD936XovjHrbYsA/mt+8m6767YMMTzzLCraVMPJ/AB/9Y8oVzvpD1Bl8u+eu6Of83
9glJb3vvV4Mf/vEHRWBBBZHJDrT5xIq/EAUR1B8Bx95vTHlMB1TgfwX0mwz52gU/mskPIhZYHwDv
J8AB+qqABryJBS6wPgpc5nav0hm6IBiSCmpmYVQ71P54Uj8AWjAz7sOTBjWywpJIYAIUkMAJH/K/
CkRghhXLX5g4CD2WTOCH/hKQAEQOkEAFMtB2WgMTDyl1QIRQ4IlPnIAQH3IBDBjRMynM0ghfAsUn
TvEhFrCiDUODQSot0U5NdAgFACjFiYxRIT+8YBKntMWaeBEkL2yjvxyIpOVZ5IwGuUAGMjCRIMbw
ixv5IRARSZkyGolyu3uAJCUpESjqkSOKBOIH50ikM7ZQJIMc5AUeEJEuUuCSGoHhKVEpR07+qI4m
CeUgSRkR/0XxI1EMImfI5qMzAtIhsswALSGyxlMyMpEv/Azp0BchP1bklxEZZASGKZFjFiSPhQyi
LrG4TBpBkiYPGCQetWlNOGaynCgkHYwACbsFqIAik6RkR/KozYioUpMG/gsWi+z2SY0wgAELWAAD
JhLKUXokk6xkyD0Tyk1ZoYidqgtoQP8ZTVnKE5OKRGdCYMhQ0GQRRHXrp0fcqQKJSsSiH8koSBzg
AA044ABIdOWZfMlMMqjgphM9aQamCYGEtFQD2ZTiBDzC0qI6YJfqzBBEazoQnBJgpUatJjk9ooGq
VvWo9uKjnMqWxoQIlAww7YgDGtCAokYkj4vsiFVdilUs6hNCS40JQAP6kbW69KwZ1ShF1spSMiaV
QYLr6kIE+k+KqtWqDchAWB+SV5BclTTdzNPryjbXBUhEoial6lXbChEp6rUiRiWku/4qIIiKRKKF
jchNS/rVj7AUqCu9/mtEHJCBqJbmo/uJ60gw29qHkHQBBHgqQgIggOJKxKic3QhyS7BYhqy1tqiJ
bH5+mcbV5jQi7hRocwlSXAEEgLgQ+alZxWrVvkKEr8mFLGnpE1jB/lagNvBId4sbgPPyVbPllUhV
a9tThAxAAB7V6npoKtiClHSgYO2IAGLQ3frad7/bzUh509sQ8yJEAP8dwADIUIMItzJsnYqeTLIL
EhjEAAbdjUh+HStb+WL4vzUIsEPT40xWFdirE7XsRxpMhhh4+CIN6EAHjktbC29EADJgMIYdLGMQ
q6q9NeGtjj1CXON+hKxYnq1RmduRGCh5w5CdMXjaqzraita3OKWr/ou9C96OYDnLD8mAVWtL4Yt4
WQYDYPJoZYod6kbSAZKsM0Leu4D4JmS+EJmvdz0iZCGT9QQg+HFBfqoB6H5Ew3q+7VuvQ+aThHKS
EEmzAhJ8kPm2uSEL5rGbG01WFW92xxjGcA1CIOmsilk6BGZqMKnpkCkf2tQPWbCSAcxoRzfgpEY+
yKkT/WIwpwa3uBJxS+Q8SwjUmiJeVrVDULxoHytEuBGBs0cA8F1ykwEGIrg2GZAsg+LmmTXrdRb3
XiJLQds528T2SHD3DZE3H7sj3w04AGAAEXw7+9dNTtZxamzjmoRTJEoGgLc7su/gPqQBHHjzmtkc
kSTjOdMF6a6G/gei7vZtGjiddrgwec2RKuebIxUPrq8V0ugOkNUEkT5yg0HekINfWMNAr0GMG4o3
3/gZJxcYJajX/N2Xb2QGM+D3Q1j9bwXTFwAgSTKis8dn2viZqRDZdQk2vmiPQD3qBLhBzhki5IyH
pOkhuXOsNV302kCSqVAMe0FJWWvaVvohJtY2xS0OEuCC2yECry+6S/4QLzPY51x3MmxMyxL7SeCI
DLEo5g+CXHsTxMTcxrpHBlDxj/A22Dsn+KUxbK6Tmyt6YB+IKesXdpYfJJTjbQi3AzDxhChA6g2p
OOQzQgDezvraiuZ5Rtz9X5KbhpfPhiVL1mjCzW9kzsneSMyD/k8AtBNg+BZZwAxUIPOZ/1rwHAG6
hgUw6+i/7TS6lYktA1jX8n52IjE/vEKgDnyO3DTqvcUQDSZ6ClFlBKFuSOZuThdd1zMnsdc5R2cT
xWR9HLFfnlcR3ed9DnF236d2jOcQ/6dmD/FdDREA5AYAoqd6CyF378YQP0V00EMoD0gXsANNGWFI
ybRSg3SBFJGB/bcQwTVqIbEAQghrARcAKrgQC4Zn4DdptmUvaTMo3MRVN1ZKGTVURIVcIMF/aQcS
EWBCvpVZAGdqBOgQLbgQ4lVUHzg9sTKDbpFyPdFFHXUR1EZnhfeDGwFF9YNDOJZjx8cRwMZiE2Zr
aBQ+6QR7/i+RQKVkSfenX4P4EdvnEf/zRBRoELyFYFbnXWWIXy2WTjSjKHuEiC9RQiX0EMUUQw7x
QjmYeXPWiGQgZA6Rf/qXERWgQPS3EGkWgC23bGvoEI94QasiLI1EhTNRQ2/kEDDUiOTkihboEP4W
fFw4i7R4AbZ0f9ZlfhohcFiHbq7VUjy4GMuyK+3zTTSRdAl0jAe1SK4Ybs/IEFyIjbQIQKEmggxB
Yg5hasqXEVrYQIvjhkEDZTdRRRSEjhyBVp4FElRXdQuBdjdgiuzjkEOIWTaAfIq2icq1X3TWi39x
Mm/CGHCIdNRYiamkUghpbArJETd0iwqxh7Q3UqeHarv3/hAt9WCV9o3I8zNV2BXxtxNf+IUjkVYl
aXMnmYd6KJKyV5QjpQIzgFqo1l0WiRDIxXjY9xBopRcclJODA5A+UZRGeRHLKBLiJomT2JVkMIkq
qRGEFhLL9RCPlYrkhIU0qDRY2TZUOJduVENkWRHquI791o4dUYu2RJaASYkfkWaYSF6/mI4kCTlE
w3C8Q45EMUFXBBIIxZcX55ccAZg29FmDmZcVAY8aQWmd6BFRhE+rczR2eRUReBQVYI4EuVFwiYyN
9REJCRLFREyeORAP2RC8NZH1x1YiYUlzqDao6Y+qWZdMcY6eSU+xuRDnJJPA2RC1aZu76REsmZcv
yWI2/lkRq2SZW3GVqVkVq9kVlXlWrth5DmFsYTgDDnGdtomUChFQS3ldWaiGIRFEB6kWcmmc4vmR
XlGZ3umLlWaHzggR2akQXdSSHEF91TdYuaiDdJZ9iTSbllOchuGfYLFQASqgNbmdBnqgCGGWuYlA
FXSWB3GNICFnFuihnfWcWFOc/Mk1WmkWpbmhDHEAGrABNRkS4zefoKmbJTqiNFRBnslafdlqDTGV
nUVMqzScdLlBhfF1bKFIJNGWIBGCungQnRkS/iOkRxqWCZGYC4Gf26RQ3QkR6lOdSgGeMSoVGIoW
X6mWT8gRB2AD42ekaiSk/vMQX6imHMEBHZBxSFph/uY5VQ1hmg3hnmtqoTIzo21xTjaKhvtYeIfZ
EYq6EJfaEY0mqHgEqVw6lkfBQ+Hppm+6FgjlpBaBXhFJjwsKnwjqqn9KdZ1KoX95jl06NjDaqCAx
qkNRms3pU1Xlaq9meiCaEQxKmAgqoiARZIOaUov5Ea7JhzbDqDeJnHfBUahKBpN6o/fVEABAX2GI
WR8xmCZqEOQaEhonEoj6EZL5mjshqm0KFaijMLyaFTuYew4hocqWeBuolGKYmUTaEFt6ZZg5T4bq
hRDQpz8xr89kg5azQfGqFQdAaQQKa+h3EAdQA9dYhB2BrGrkijBFeAwBqEI5lBuxjJGqEP9Tik3T
/pgRSxUdyTyTgX0sinoXmxDz+ZQHwaoMobAgkX9s13bNWpB5lbIhaqvuKhMu+7LiKS3JwrReIaYa
IQIwgGLDprMYUawIkakwF4kKQbKcGmewdajP2hDSmhCtOZBJmzE4CbVVwyfvlxlFZbIX0Vw3i5bi
eqMJ6qXQWHoMwazhNafmlJ8N8UIxdLYHIZDyOBOO6RD1yhUyuDmcgZ4hQW5lN1JQl7fJOn98647R
mKLbOqYtCpQNMZBKu59u2zafGD+egVj6mhFHaG4cEQI2QAAP2hDneEf6xoUhMWeWRppyKBRo87hg
0Sh34rB9cQAloKogsXP5OBGLhaUOMbAeEbIc/suJr3sRpvSrLQuxFXM+qZsWGsABw6oQA9BuC6iE
O8ejPDs/RosQXotftdW5DCGH7zsS8BpTdNK4mFFVZcUQQOdu28ZtV7eq1SsQhieN8Bu/YvW7IaG7
3QuluxSDcEsbItd8NzoQdxtyVhau7XsRIHADDJwQ3ee39clSZ+YROMi9mYO6yuS0PRQbwqaAIBG7
z1sQUvajPQi0nquBH4F72WsR9msTwxu+xCkqRhwXBxACMcaCN1wR+NgQTGy7rJWlGOGDMgeNaJfB
E+G7NWu2wXu6uRpm6pLEcuFxGGyx4LoQ0euvOtyDn/sQIruCLpe+B8G8DBFOKTw/83e/f8Q0/sQr
F+EIG1vnEShGwE9MEOP3wcS3xSERiEm6ow0RT7YXomzkx1ozxqtxKoFsFwHMehtxAFQrEAMYZXio
c5Dsgjx4AHqsdJV8EKfkEkUcG61ixm4xX2n8ESZoxxmRrjd6AyK8b29METO8xh0RTMLUE7M8G8jS
yXIhdx08buWWyBLhb3R7ELIIEl6GYtRMUJ/WX5OznyEkG7VsGkssdI63ZDUcux1xACYQZIJ6zQaB
xQpsEYvFbaD0aTmxzN3DyaqBbwoRayMXEVFcbIE6tN8Wxx0hAjHgciMhSeBMEzwkUrjhz7ahfqC8
bQWtqbIqx47cvPTVzccVThfVwjtjy8LD/skoPRf/JXK8fICjvG4FTJtC+RFh9a0vXWrJd8Ar9wBf
rDveaxzlLBsDYHAiPRAkiK5guhENXWXLpoQntsEWgcyvrC+AvNIro9KwIXQel9FEtYPVXLCobMwC
iG85jcAlpXffHDon/RwW3RqL9XhyKrgKcQAnMJ3yhcgQEXgvXadkMFcApdbJjDJXjdWjo9WvIdBN
SIcDGsQGUXMIrRHbTNYcIWUVVdW0c9XWMdStgdGLXRFeHBGQLc8WsWChV3i3G84nbdiV0cysjRaK
dtYSgaNS+7c1fcCkfNTYldoSzbB/7B2cnRrQLNtdLMk10dSU3RGi1jOFHR7BXRpMnGSP/oe1F2FU
Y0un2hqdzCbVGTHMKMHP4tEq4wwacR3Nt3fdgUvXoRm6ApjKGuHXlSUTvm1jrx15DVgbKOzYd9yt
iBmhEWHWut1rWnsSFN115vHcr0G5NKnfjriiEWFiEZcQMOVOE2HZLxPU7uHasoGRDtwQtF2+h2Xc
2z1YqOXdTcXbVk2t8oHgq0GzezWah8XgFT7gXmWYJwHe81HL9Z0WEeDgN/FaMn5ZVWziA5FdRN6w
mnwfg/waIG6w2WoQE8veGnGNR/7dmu0fOt4ayIXeGoGyx+XiprfczJ3kWM7ipaHgROtZZZqveNzO
ZMDILYHjpeW4La6kHQGplpmjVuoR/jYQ3y1M5gQSjjseFm1+srRqXz/dEIWVWrJ85YBF56jR400+
oU9eEXq8xwLOlGxNr82E2KfhUvTLEGSKyQRByZh9ojZO2G1dIeO9urMRRxQRpz/8aaduENdYqSIB
r4MOHRoOG/gpVBIBoLOOUhKBU7i+q45+Jp8CG55qT83uERYV0RBhWLnuwh8i6K5RnsFethxB7EWT
7CFi5qaBrZVeEOvqEXr87cXZ6tfu6alB7qS+EZKkdIwr5yci7qNRlfd5SxLRykuXMau9TpCOGl7u
rKQbZ7JkUI0uwTKS5aeh7cALRZYpSGu96dCy6+1hKxjPFRDfsV3knXt34Qx/I0tO/hrwTp0mFKCD
JO0koeu9NPCj0Z3xLhAS7xNL5MySVcalUe6FlIwsXO8BXyT4jhq1SBHPPuarfiQlzxolZEMWUElD
LNHNzSQOvxpj6aVy+PMqcfMbXyBLjxpF1KW9qErGBBNc3/V5AvOnYY7r07kQzBLz3bBapPalIZBt
PzZBryW9fhrKCTiQwulfovGnsYf0g7jqPvJKNPSbMXvKDOhiUvWhYYzlKsY7wylf7xnturhEPPWj
AvmYH7BSz+4GbimKfxn+M/PBwvnN4vm8Ljr9IvjRUcRoTyalLxz23jCsTxwu/zSXHxzWzja5vxv5
yziiX8HdUjeuU/vNgziz30mO/tv8Z3H2z0MGcc8szHwtxQ86wR9d4jz9xaMu8Hb73m/81+N+GD7+
5a/zo+X46O8xdP9B1X9r7R8R2V+I44P90J/4y45CQzP/uvL+AEFG4ECCBQ0eRJhQ4UKGDR0+hIgw
wcSICicmqJhR40aOHT1+BBlS5EiSJU2ePImxIUWULV2+HHhRJEuYNW3exJlT506ePSvSXKjS51Cd
QD3KJJpU6VKmTZ0+1Sh0IQKpUK1GnIggJNKrXb1+BRtWrMWqCcuO7cr1o1G0bd2+hRuX5NmDdOX6
VLvW7l2+ff3+HbuXIFvANwVnJFxY8WLGjXEejun4Zd6OVCFLxpxZ82azDy9z/naYOKpo0KVNn2ZM
evBn1DETaN3KuvVs2rW9fpZdmjLH3bZ9/wYOFXdwgap/5iaeXPnyksaLA3cOMTpz6tWtd7yMfPH0
0NqvfwcffnB31L1HexefXj316OjfZp35ev18+vUJwmboPrD+gtzt/wcQOvIa8y+oAgNEMMHyPFPM
vKgUhDDC5Ybz60Cy+JMwQw0rzA5DvKiaCcQNRySxNQrRchAxD0tkscXAPFsRJgvNmtFFG2/cj8Hb
VkwRRx9/jOtEp3rECkgjj/wLtxhBqrGuJpGEMsqh2lOKSM9ElDJLLcXKDq8n+1tySzHHTAmyLx+M
L0wy12STSR1rsvLNNuek/nNKOcuMMc469+Rzrg7LHEnPPgcldK07jzpzICwLZbTRlA4dLdBEHaW0
UtccWvQn/JhU01JPGxWyuzw7/bTUQkOlcVRSTWV10PYEi9GyVmelFTFI4YutVl13De1NQfNblVdh
6XxV1WGPRdagLnNNtllnzdQrWGenXVM19HClNttm9/JOWm2/rbYzrCYFt9w9E1PSW3PXFfOsTWlk
N95tlTVQXnuTlS8yJ9W9t18thSqLXH8HrlMloWQlOOFjL/pVYYcr5fdhiSemuGKLL8Y4Y4035rhj
jz8GOWSRRya5ZJNPRjlllVdmuWWXX4Y5Zplnprlmm2/GOWedd+a5Z59/zgY6aKGHJrpoo49GOmml
l2a6aaefhjpqqaemumqrr8Y6a6235rprr78GO2yxxya7bLPPRjtttddmu22334Y7brnnprtuu+/G
O2+99+a7b7//BjxwwQcnvHDDD0c8ccUXZ7xxxx+HPHLJJ6e8cssvxzxzzTfnvHPPPwc9dNFHJ710
009HPXXVV2e9dddfhz122WenvXbbb8c9d9135713338HPnjhhye+eOOPRz555Zdnvnnnn4c+eumn
p75666/HPnvtt+e+e++/Bz98sgMCACH5BAAKAAAALAAAAACAAuABh8ZwGdqZFtayHMS+KaPCS5SZ
an9/g35+i39+gH5/fnmPeGq1cFi8dTq7hh2umBKpog2bqwJ3sgFgugBhyQCD2ACm1wC92gLO4wbg
7Bjl4DPq5ULq8knq61nu3mrg3nnP7n7E/H/T/X/n/oH1/If89pP+6Z3+36j+07D+yqf+uaD+q7Tm
oeawiPKde/a2cvfSd/zldPrzden1b9j8ct7+huL+ltv+odP+q+X+2P7+/v7+/v7+/v7+/v7+/v7+
/v7+/v7+/v7+/v7+/v7+/v7+/v7+/v7+/v7+/v7+/v7+/v/+/v7+/v7+/v7+/v7+/v7+/v7+/v7+
/v////7+/v7+/v7+/v7+/v7+/v7+/v7+/v7+/v////7+/v7+/v7+/v7+/v7+/v7+/v7+/v7+/v//
//7+/v7+/v7+/v7+/v7+/v7+/v7+/v7+/v////7+/v7+/v7+/v7+/v7+/v7+/v7+/v7+/v////7+
/v7+/v7+/v7+/v7+/v7+/v7+/v7+/v////7+/v7+/v7+/v7+/v7+/v7+/v7+/v7+/v////7+/v7+
/v7+/v7+/v7+/v7+/v7+/v7+/v////7+/v7+/v7+/v7+/v7+/v7+/v7+/v7+/v////7+/v7+/v7+
/v7+/v7+/v7+/v7+/v7+/v////7+/v7+/v7+/v7+/v7+/v7+/v7+/v7+/v////7+/v7+/v7+/v7+
/v7+/v7+/v7+/v7+/v7+/v////7+/v7+/v7+/v7+/v7+/v7+/v7+/v7+/v////7+/v7+/v7+/v7+
/v7+/v7+/v7+/v7+/v////7+/v7+/v7+/v7+/v7+/v7+/v7+/v7+/v7+/v////7+/v7+/v7+/v7+
/v7+/v7+/v7+/v7+/v7+/v////7+/v7+/v7+/v7+/v7+/v7+/v7+/v7+/v////7+/v7+/v7+/v7+
/v7+/v7+/v7+/v7+/v7+/v7+/v////7+/v7+/v7+/v7+/v7+/v7+/v7+/v7+/v7+/v7+/v////7+
/v7+/v7+/v///wj+AMkIHEiwoMGDCBMqXMiwocOHECNKnEixosWLGDNq3Mixo8ePIEOKHEmypMmT
KFOqXMmypcuXMGPKnEmzps2bOHPq3Mmzp8+fQIMKHUq0qNGjSJMqXcq0qdOnUKNKnUq1qtWrWLNq
3cq1q9evYMOKHUu2rNmzaNOqXcu2rdu3cOPKnUu3rt27ePPq3cu3r9+/gAMLHky4sOHDiBMrXsy4
sePHkCNLnky5suXLmDNr3sy5s+fPoEOLHk26tOnTqFOrXs26tevXsGPLnk27tu3buHPr3s27t+/f
wIMLH068uPHjyJMrX868ufPn0KNLn069uvXr2LNr3869u/fv4MP+ix9Pvrz58+jTq1/Pvr379/Dj
y59Pv779+/jz69/Pv7///wAGKOCABBZo4IEIJqjgggw26OCDEEYo4YQUVmjhhRhmqOGGHHbo4Ycg
hijiiCSWaOKJKKao4oostujiizDGKOOMNNZo44045qjjjjz26OOPQAYp5JBEFmnkkUgmqeSSTDbp
5JNQRinllFRWaeWVWGap5ZZcdunll2CGKeaLCYypYQJolmnmhGmqWSaaaz4IZ0FqkjFnnAjeSSdB
euIJIJoI1HmQoAL16ad+hiJE6ECLHlpfAghA1GihkzrKXpsSVUqppe8l+pCmjILKaXeYXiQqo6OS
5ylFp6Ka6nf+q06UZqSftvrqcqVqpKetm946XayyGgrsoLz6+tuwkgKL7J7GIpdrRsv2WmuzxAXa
UZqsZkortbxhu1GgxRIbUbTcqubtRuQ2lG645Y6WLkPnelTsu+12Fi9G4Ja0Lrv1WnavqdamtO20
/Yr2r6n86hpuwgUrRq9CB6+0b8OYPYtRxC9NTLFkD0PMsEnzfrwxXh0rWnJKC4+cmMUIiyxxyCoT
drJBGP+kccx85cvRzDUt7DLOXwF6Lc83vfsz0FoRHerROt2M9FqQMm3nwFY5/TRZNWea9VQ+Xy3W
1uNKXRS9YnsNlNKhmmW02VmBXSvaTlnNdtxww811pnPTLbX+22XJnfdQddudNMx/BwXu3mV71XXh
PNnNd1xrM46T44n3TbjkMT0Or+Z3vRsw5i8j7hi7lYM+6Offlv6W0aqbHrjgdrFuuryBbxb57C0P
3fpei+MettiwD+a37ybrvrtgwxPPMsKtpUw8n8AH/1jyhXO+kPUGXy7567o5/zf2CUlve+9Xgx/+
8QhRYEEFkMkOtPnEis8QBRHQH0Fkt29MeUwHiFDB/xWgwGTI1y740Ux+EKmABdYXQMq4j1oGPCBO
LnCB9d2vMvlLlc7QFcGQKLCBFdNWqvaHEgoIUCIRiEAFVJiZB8ZpgxqBYUkkIIEJ0FAiAKTf+PBm
pg5CjyX+JpyADSXwkAMocIH/u6BmCLglH1IKgQkxoRSJCBEKru+EnHEhlkgIEwlI0YYRsUAFVwia
DE7JiXaCokOkSAEqRsSEbiyj1qjExZrU0IsfqaEQL6PFJC3PImgsyAMukIEHTISGiJyAR4Q4xIp5
D0mUa90gL/CASkqEjW3sCCOFGEd/zbFIaJShSDJASlIa8o0BhKMmgwjGJQZLSHU0SSkzQEmJSOB/
quwIKzvJR9L5CI2BfEgpLwCBiUwRJJz8DOnQF6E/ViSYEslABIqJzD3a8o68bOEyaRTJmVSykBnw
CCIRKZFNZnOJviRTLDPCgHa2cyKUrOQpOWLOcyZkAqz+VKTBXrkiu4lSI+58Z0QIWUpL0tOcl6RA
Mt2VThMFUnoMWIAKAjrQWc5zI5tsJUR2aZo+eqhu/+wIA1SgggUINCIW/Qgj7XmRBmhAA2Q4gO34
ySFnsoqZZCDpRAlAEWletCAubQBFxvmRBjjAqELNYkMv9FA1FmSiDLDBR45qVAdck6gdeWkDtqpM
JkJIcE49yEgZEFOPvFQDW7UqRDLK0om49KxGleMn5dTNlwSUrB15K1qTutaVtnUiGujAS9VaxqUq
CKxSG+tE7opXjmiAA2ctgUz72sisapWwodlmnl4ntrtGZKRQPalj0VoRjXrkqA6YLENlVaCmhoSx
EiH+qUkba5AACEAAE6FqXKf60tw64LeYXW3Y/lTXkHSApO6MbUkZQACp1ta2AQiARNIK3NMC16qS
fchZM/Bb1Gg2P8GE4nFD69zPCkS1BLmteqULkbNqoLscccBgf1sCiMj3pdwNLmnIhh/E4hS5eC2v
RgQAg/VGxL36xYh73ysRDWxgsKzx6KU46xLaohcjMYhBgW974MtmdyP3hXCDGZwQ9Q6kBhcO4Vwn
TLuYJBckG5ZuDCKCWpCcFb4dGcAABGDbGtSgsKxNj02DhdOEeBYkHBZIDFLc0g7w9SG/5S5MO6Le
2w5gv171TniLrBDYeiS6t2VvXrdKZhpflwwfzoj+ADJs5Y4GGTz+FckDSBkRnb44IbbFLUSqzGOP
kLnMUMZvfqnM5iSXRsLV2TJJ5GlQh4DWnTYQcHqhK+aGENjAHemApp3cgBOcAARMLkgGtptgDMdA
AFdOzXetE+eSWPSnCwHwQJjM50ovJMMb1jNHNs3pDr+31BfJs55rEIJQe4a/1AEmNBMyy0LWtyMw
OHWYIaLhPs84071uMHdBouMdC+DH5spyctZ5EosW09gUwfVtARARXZNhyQghgI4j8meQCHsgMBAB
usnA51RH+M3KUTaXRU1LWA9Y2gG4dkfk3e2H/JmrHYluAAAAgADAAAYOWbO0/R1hcftmyDSNCZ3+
Q5JnJe87IgwngMo5rpAGaBrQHKnyxCEygAxLeyEmJsjJ8RfyY5Vt2ROpZDztTemPDGAGM9AxAQrg
EF5v1QQmAPWA18vuPZ+a5QbpNod9DG57GbZ7iL0JKeNpcIzU+iNI7/YNHOLylz95wDFGcpUHQAMs
r9g2Wx54Q5r9gBI8WyFTzniuba2Row+Ap2S4gdQX4na5z/wjGm+zm3lYm0jitH5Y3PswT2nsKDsg
nA2Jtnqr7pGGh2QBErm3QPK984bUvNDe9Xjso8cSGkbghg5JKUOuC+yCrDnMCleI4R/C8Hl7JKIm
Rb1DJC7xi3vk91g/dM9VHT29k4GNt289GWr+yZBRa4CUOKY2upVu/IV0m/weWYD632kDYqObz6SP
+I4HIAOdd/TrWKb9SyiAy1xadr4goXIrF30FcXRJd3jpV1LqZ1IZJ3PcpnVcFwLU9zan0VTWVxD9
Z1qj9WvaR3xpp3JMxxAzIANKt3YcIVEKSFs4h3AV8X5z527mcj1zcoF0AXLTBxP8538f8X29dxEf
iHgMYXippngdGGspuGfrxhAAMG34toIb5xD31VUHRCg0CDmJA3QX4UUaGF9nhnZJp3IhwX8QsX5E
F10Vd3EYxxAZJgOG1nJV9XYzJS3MolQ/F1bl5FcgAX7VZXTzZoIdgXlKxBCKBXkOSG2o1hD+b0Vm
fleEjVEzVQg1dfiI88NGEsCI3UdqPUgR5EeAF4F9gWhkFEUG7jd1mLaDCCaFaRQ+2lR9QcFGW6gR
2wV6HiGAK+cRAJREgshYfkiKSWhjp6hUNKMo/lJcLgEBAPQQrvhXAnFH+sQQN5ZajsYAEKcQBPCD
IcgRSBRAESCBCoGCs6WCpGhrlgh4ALiK5xOMA1SHMwFAEMBCyJhJDTFOuNcQmUgQW9VO05gQP/gR
RxRAymhn4KgRS9hnqycC1rVbveQQu4I/xBgTC8RAn3hQnKSME6Fp0piPCLGPIAFCDSFbAZkRzBdd
zjdVXZiOiyOJW6FoN2FFuFhNEwkSJNX+ARcZEbuoECr0P2vEPiDRTgtIBjbggqV4WvhFXyQwjnxx
Mm/CGK02QRhwARVATS75ihqhAikwURipESmUlZl3EClkQvXzEV6mEGfni0PJkAqzMg2ZE2NEEgsV
EirgZBGpETmkQwqBSXF5EQu4gB+ZXhfXi/R4VmW1ECG2bQ6hR81IMkRjh11hg3e3E12ZQjqZR/IY
EvXGjwxElwlxi/TDjRvhjWRoaQRJj9fldw1xYw+hR+QUO0qjmFzhXyjpEJp5lxlRTyDxcHCYEWJ0
RW31Qdr4ETrFgGS5hyqVUTWYmFg4FhZoFA/ZksO5UiCxaTDXEVckmwTxQbcHk8DJW8/+GBL4pFDW
BBer+ZpSoZJHwZJkFJXzuHu91RBOd5srgZlgWVIC8ZNmBVkkhkwctTpHw5opGYlMMUbUWRCGSVkU
SQa8x55u554YcZNbyRE5GJmg6E41OVrhp1IKVaBBY5ziCRXk2RTwuRB+haESwXv1SAZOBhE8qX4M
kZVd+RH0Yz8NWhDfKFpcOGhGyRA0ZEOHeRbhaRh5NxZsFRIh9msgsX53hhD996Fy2X/UCVpGChIk
+neahFA82qOFsZRjkU8iChElgGAlKhF5mZ1IepkBakzZqKRP5ZEhEYtfWk7eKZWKs5/8iRUdWhZf
lJ4cIVPbCZMKKKYHIUa4tKUNAaj+HJkQv7mXCOFyDoGJ3JmfXyOnV4qlaPGmJAFcgdcRN3CoDYFL
ZVoRuulo9PZwzliWEMGMa3ShGMqgTdFBxxkWkpoWOZqjIkGiHXEAzqWAIiGGMmGbmtemZDCZDgGn
6SNFX5kUVio8YQcXQbqm8+WrKKqiIAGIMWoQOTitGLFpHHCVGmGYlcWPt9ipTXOsgfGjcrGsZEmk
YBmKHkGsZcquz6lp2aqgF8FWguoQhHqegCOnG7qqV7ivPqGlUAiYDtGl9vmlJecQeUmjGHEA/JdD
ATqX4CoR8IqQi+ScIZGb/pivHCQzrzoXQUSRtMoQk1WODCFxFdcQnumnGdGPJrT+EPx3RWiaEZXJ
ncKqERAZFD40p1aBOgqjs05RswTRrM6KhDwWXQxhA7+psis7nQxRAU5ZqBzBqyABrNGqQin0Ezz7
TK3qqvr6GAfgd14aErUWfwZxAD+mqRuJrwuBS0UUqjMrTlRriw67E6zqr1GRlMxDGWELY4UIqg+B
fBsFoR5xA+fHENiqrRnBrXiKjWOktj3zM1urNnJIgZdBshshAmjIb2FGthtxZCvqldZ6EcWHgApx
uPI6rxb7jg9xAU1pQUUDuXZbFYJiK5FLF0h1uhKRYmZ4enqJqDFllw8ogJw4EI3nEF8rXyMHoi9Z
mKhprxTkuBlTtzzHJ5vTGX/+dlQiMXETx7kZQQCy9ZkKcYu9uXBpd3jDOxCImxAhi6MRQZuwGbEj
kbM+i5zoOIWfAVfpq2YhuREhYANrd6i+SwYsG7oWMYJfqAC+mF9D2xCYVK8tgTbz2zfi8kSf8bVd
Klh75Xow2BDCxmPcOxHohbZNy7QecQCGJ295yKglnIw207V8dD6xqxaPJVgUixB8BhG55sGvhcAP
kbEfcQOEW36myINheKeNI64vPIURTBdahbvnt2Oh53xUZ2mLBb4ZgV4C+BBPLBKWu0gKRcAwAcEx
7KrQM7u28XtWtsEFobsfTBAVV7RjOKMcAQJATItAaH6HV4seUQKet8DxOE7+OyoT8jvGXzO5aRMb
PmZzkgd5Jkt4CRGmATwRdnzH8Va+KEySJalLRkwTYpw9okLIcHEAIdB1hebIagZ/CzHK/vu9Siu6
SCe8DYF0X7gQ43hfeggSDSzI4QnKkqsuvDwXN/cROeyXBxHCHsnDHFGNMyCAyKwQH3i+7yYQOaee
Q1micyaLtJykDryx3FyBrfLLcIFqi7wRaYjGpmyo0OqFy0zJGxEDHbyopMoQQtdoTauDKjHIzePL
r+FtOqbGFNE/aSjNoUkTWSy26+XPBiFiCvG1ZEBLZHeaLtHJsPHNroHGqHbOF/HGRvsRCeByuBtT
QHwDdix3fcsRBFVQR7z+M+AsF8iyxHhBAzJQaNBcEcx3sn72tgwxyZBXaAPNEbPEfa8rp1QzGxRd
GqLsY0rGgiU2zURLzBdxACZwArb50WSgcut8yRqhWuqG0BihezYh0WCnLqzBhAgxf+McejLXxhXR
nh541c2cESJwbWSdh4X01UoTUrhxKitdFy/4EFIcY2pNEW2XbQ4hy2D4Ee5cZSHxTUAdxkzj0tOj
13stF2vI1AgB0OnV07v2chJR0MVsdkGZ1QLBaPQcOhw02cijkLUR01eH0RcxaoLt0R3gERlGBqrX
gCWtESVw0qb0wI+N2pGqz6/Bde8WzJg8tKJKiEXL1b7H065NBhGFUnz+d89gzRx6/RroFQADYFtQ
eqANcQCe1nY4zYttqIbV5s+2KhA8qbAK4dUg89vA7TCSHRtmrd1DDH4R0Z5U3W7SVt4MsWELYQNh
mXt1/d6/zWqq/Rr9tsd763DQud8RociarRGeyd6ZA9/Z0dLxbRYSPtMQoad7ChHQWcL4BuBF+r2R
jDJZC0gbjkEJvhoSztwVMWqESRO1PZAybhEifOEq3eJJDC+pMco/xmYePqLenacCEYWpl2fc7Zat
/DIqXR6tMtShUYRKPl17VaG6feQPMZYbkd7qLZ8wseI35eNeJ9y0weXa5V4QDmVqDpqhrRH+67kq
gdeNeR5FLRufp8D+vtql+DvEXfzf523KN0oGCZviQ3Pa8KHhsuFeg9a2ZBDiG6jQOFxg5yxVERXd
EVHhiH4xSLzoL+4ag+nH+atggZ5xrk3nCIvi7x3l9vHNZk4WB+B9Wk4T6AqWRmrhCuGRnU5kig5e
eS7qVBUSAxoRx5vJJ4jivS4QT36W3cwfsC7q1OXHChG3gfZrtZ4Rh/rWju3CxBXqqQFX2W4RqJma
7dXgeQqQnHzgBhLsp7FgNTyb7nvupvkRknbh3t7u0R7uBYueFCHpHSEB6soS1X1Y4E4aX3tZLrm4
bt6DySsRqn4S+PxV880csbrNC/FNpR2NER+/7E4hVD4otKFHpWX+7RtBdhsviDGJjwb+60xV8a9x
8YHcEObaEdOtXFClLx9/Jp8CGzX/ED+/ET9ddkYok23+Oy7fIcsC2XiRUUB7EPNu8wUFlY/r6iPi
7qmxS/XalnR9AUHNQSEPIoy+GvjE9TdxzdgcvTufIlhvGqZK7C1LEaQtyD0OI20/GkNk7gE/TmBs
EHxH9K3u7DKy76YR9In7RU9PcJtH8J8eI7R7GmVv9hqBSfAo3b1N3VZ/I0tvGoiP8ZmZSomv+A9A
9SQx8Txy956RuuuaSp7f8s/+SzB/HDk681Wf9LB08KuhQCWPVXa99kSy+a5xk+74Ro46E2Ic63+i
kMjvFQ4LvwP+wcK67PtLAvypwZsrpG/E/7HdXvd0hPujYZ7O//wX+hJkrrVZgvqgYQGtC71nw/1a
MvamgUThr8thj/Rf8vimAYjz79uQOibULxoAQYFCBYERIpBBmFDhQoYNHT6EyDBBgogVFU6kaFHj
Ro4dPX4EGVLkSJIlTZ5EmRJhxooTVb6EGVNmwgo1a1KIcGCmSIwoWe4EGlToUKJFjR4l49LiT6RN
nYKsYMHCzacPlZrsWVXrVq5dvX5dqfEqWLJIpRI82HUiAp9My76FG1fu3IRuHdqlm9ckQQlcs2Id
q1fwYMKFVeKViNjw4riBSTpmHFny5MiKF1qmnPko5JB/NX/+Bh0aLGeJok0PJf0x9WnWrV0fFov5
9eyInkfapp1b9+7YYnn/vis7tnDgxY2zFr76uGjcnYkvhx6dMlvf0k8352ld+3bmyblrVt4R+3fy
5fMmf27+63jV4dW/h88Vgff4dNO3pF5f//7Rvfmvd2+pBPL7r0ADm3LvvgMPC1DABR+EsCj6IhSq
wZYspDBDDTlCb0OY2BMPQw9HJLGhBEt8bL6UFESxxRYJhEhEFGW0SkUXb8Txwo1YHJHH4HIEMkir
qhPyIhoT87FIJR/sUEgQQ1wyyiVPzPFIJKXEckqNbCxxrZOezDLMLifUEMwdkxQzTSaJhNDMM9WE
U0sH11z+Ec047zSQODuLc9Oi+fbEM1D+9BwU0KSsFDTRPJtUz8svDVU00v0IJa/PCyGVNNP6KNUO
0csw1TTU+KiMzlMjRUW1SDL5hNTUVF+d1D/eLK3NVVhv3XRV1xwFDEZcf73R17tms/VQYI91Utbu
2gIVWWcb3TE0Wmt7ttogOZ2s2Gmt5XZRZQsb0NBwuyUXSGz12taqZstltzw9141J22LbpbfRc8uy
Nd169y3wXrW05Tdgc9/0Sl54BUZ4O1Kr0lciLhOG2EVdJZQ3YourlG3eaJm9uGMc/ZWp4dI8JvlG
kOtsVeOSV+YuwXUNZjlmkzd+FNKHZca5S5pvS/ngnH/+ls69m8UTliefgUY66J2HqzNppyVeWt2e
n6a6RZepRenPqreGms26BmyLa7G7XurrlMdG22r0pk677Rm95tltua0u+zGV58bbutV85DVvv0lU
jMej/yZ8OcTuE7lwxd3F693BF4ecz4aK/jRyy3W+rNbLNwecwMbv5jx06FhyC3TRTzc8LIS0Rr11
DzFK3HXZK529dttvxz133XfnvXfffwc+eOGHJ754449HPnnll2e+eeefhz566aenvnrrr8c+e+23
5757778HP3zxxye/fPPPRz999ddnv33334c/fvnnp79+++/HP3/99+e/f///B2AABThAAhbQgAdE
YAKZFbhABjbQgQ+EYAQlOEEKVtCCF8RgBjW4QQ520IMfBGEIRThCEpbQhCdEYQpVuEIWttCFL4Rh
DGU4QxrW0IY3xGEOdbhDHvbQhz8EYhCFOEQiFtGIR0RiEpW4RCY20YlPhGIUpThFKlbRilfEYha1
uEUudtGLXwRjGMU4RjKW0YxnRGMa1bhGNrbRjW+EYxzlOEc61tGOQAsIACH5BAAKAAAALAAAAACA
AuABh8ZwGdqZFtayHMS+KaPCS5SZan9/g35+i39+gH5/fnmPeGq1cFi8dTq7hh2umBKpog2bqwJ3
sgFgugBhyQCD2ACm1wC92gLO4wbg7Bjl4DPq5ULq8knq61nu3mrg3nnP7n7E/H/T/X/n/oH1/If8
9pP+6Z3+36j+07D+yqf+uaD+q7TmoeawiPKde/a2cvfSd/zldPrzden1b9j8ct7+huL+ltv+odP+
q+X+2P7+/v7+/v7+/v7+/v7+/v7+/v7+/v7+/v7+/v7+/v7+/v7+/v7+/v7+/v7+/v7+/v7+/v/+
/v7+/v7+/v7+/v7+/v7+/v7+/v7+/v////7+/v7+/v7+/v7+/v7+/v7+/v7+/v7+/v////7+/v7+
/v7+/v7+/v7+/v7+/v7+/v7+/v////7+/v7+/v7+/v7+/v7+/v7+/v7+/v7+/v////7+/v7+/v7+
/v7+/v7+/v7+/v7+/v7+/v////7+/v7+/v7+/v7+/v7+/v7+/v7+/v7+/v////7+/v7+/v7+/v7+
/v7+/v7+/v7+/v7+/v////7+/v7+/v7+/v7+/v7+/v7+/v7+/v7+/v////7+/v7+/v7+/v7+/v7+
/v7+/v7+/v7+/v////7+/v7+/v7+/v7+/v7+/v7+/v7+/v7+/v////7+/v7+/v7+/v7+/v7+/v7+
/v7+/v7+/v////7+/v7+/v7+/v7+/v7+/v7+/v7+/v7+/v7+/v////7+/v7+/v7+/v7+/v7+/v7+
/v7+/v7+/v////7+/v7+/v7+/v7+/v7+/v7+/v7+/v7+/v////7+/v7+/v7+/v7+/v7+/v7+/v7+
/v7+/v7+/v////7+/v7+/v7+/v7+/v7+/v7+/v7+/v7+/v7+/v////7+/v7+/v7+/v7+/v7+/v7+
/v7+/v7+/v////7+/v7+/v7+/v7+/v7+/v7+/v7+/v7+/v7+/v7+/v////7+/v7+/v7+/v7+/v7+
/v7+/v7+/v7+/v7+/v7+/v////7+/v7+/v7+/v///wj+AMkIHEiwoMGDCBMqXMiwocOHECNKnEix
osWLGDNq3Mixo8ePIEOKHEmypMmTKFOqXMmypcuXMGPKnEmzps2bOHPq3Mmzp8+fQIMKHUq0qNGj
SJMqXcq0qdOnUKNKnUq1qtWrWLNq3cq1q9evYMOKHUu2rNmzaNOqXcu2rdu3cOPKnUu3rt27ePPq
3cu3r9+/gAMLHky4sOHDiBMrXsy4sePHkCNLnky5suXLmDNr3sy5s+fPoEOLHk26tOnTqFOrXs26
tevXsGPLnk27tu3buHPr3s27t+/fwIMLH068uPHjyJMrX868ufPn0KNLn069uvXr2LNr3869u/fv
4MP+ix9Pvrz58+jTq1/Pvr379/Djy59Pv779+/jz69/Pv7///wAGKOCABBZo4IEIJqjgggw26OCD
EEYo4YQUVmjhhRhmqOGGHHbo4YcghijiiCSWaOKJKKao4oostujiizDGKOOMNNZo44045qjjjjz2
6OOPQAYp5JBEFmnkkUgmqeSSTDbp5JNQRinllFRWaeWVWGap5ZZcdunll2CGKeaLCYypYQJolmnm
hGmqWSaaaz4IZ0FqkjFnnAjeSSdBeuIJIJoI1HmQoAL16ad+hiJE6ECLHlpfAghA1GihkzrKXpsS
VUqppe8l+pCmjILKaXeYXiQqo6OS5ylFp6Ka6nf+q06UZqSftvrqcqVqpKetm946XayyGgrsoLz6
+tuwkgKL7J7GIpdrRsv2WmuzxAXaUZqsZkortbxhu1GgxRIbUbTcqubtRuQ2lG645Y6WLkPnelTs
u+12Fi9G4Ja0Lrv1WnavqdamtO20/Yr2r6n86hpuwgUrRq9CB6+0b8OYPYtRxC9NTLFkD0PMsEnz
frwxXh0rWnJKC4+cmMUIiyxxyCoTdrJBGP+kccx85cvRzDUt7DLOXwF6Lc83vfsz0FoRHerROt2M
9FqQMm3nwFY5/TRZNWea9VQ+Xy3W1uNKXRS9YnsNlNKhmmW02VmBXSvaTlnNdtxww811pnPTLbX+
22XJnfdQddudNMx/BwXu3mV71XXhPNnNd1xrM46T44n3TbjkMT0Or+Z3vRsw5i8j7hi7lYM+6Off
lv6W0aqbHrjgdrFuuryBbxb57C0P3fpei+MettiwD+a37ybrvrtgwxPPMsKtpUw8n8AH/1jyhXO+
kPUGXy7567o5/zf2CUlve+9Xgx/+8QlRYEEF05OvsvnEit9QBBFQUD9kt29MeUwHiFDB/xWwH8e0
1jD40Ux+EamABdYXwMnIjlsGPCBOKnCBC/wvApXJX6p0hq4IimSBFcDgZRZGtUPtDyUToAAFJlK/
ELJvhO4zEwc1MkOTSEACE8ChRAAowMxoEEz+HoQeS1JIgQnk8CH9UyAIV2g7An4piJRCYPpUqEIJ
JLCC62Pi+JyopRPCRAJUpIAVI2KBC6xPhPbyXpWgaCcpPoSKY5SICt3FxSh50SMXyEAGKpLCFH4E
jBOAYR2VtDyLsLEgD0jkAywwESPmMI4buaEkK6bGI1GudXrMQAUfMJEwHpEjjnykDwcZJDbWUCQZ
wEAmObnDABaxI0R0JCT9FSwh3dEkqVTlBVgJkQP8r4oeUaERZylIvPWIjYd8CAZUyUs5ivEjffwk
Z0iHvggVsiLJlMgDIrDHPxqRIjcUpWfIVk0GXXIjDWAAAxpAEUUm0iOSvGEjZUlMzZANRof+hJs6
1dkAdkokk7v0SCjlGZFoSvMz1GSR3U6ZkX32058QyaQe3wnKgTqziAdFKOlQlM/SqUAFHVgnRCO6
SoHS86IZDc0DRVQ3hnakAykAaT8nskoIIEQDGuDjMPlYT4McoImkxNA1WVVOmS7gBhX56UEeOlOJ
xLOnF2FqCdIoqzOd0yU28AhTmwqRYU6SI1sd6RbDZiHBuXGp/WQAGZS6EZzitAEOkEgoU3oRtz5U
pbWEUEfLaZB9rlOtL+3AW+Na0JNypAOI1QBXNVrVBpn1aEydCAMQ+1ePaECw/SxBCdjqEFl6BLGY
JazB8nogZEIxrBL5aEjTmRABCIAiDoD+a07BCdW6KrYBnFXpRgnUUZA0ALF3jUgDVLsAsQokAAFw
bQAkwtTYgmS2EnGAdKULXdKstD97FQloO7DYh/x2nTfIakFcS97XQsSucPWIdPs52806pLmiNU1C
EfXYkvwWuA0Ir0VySwYBwIC8yz2vXeOrkeZqVsCDNddu7fPYav6Wq+LVSAxiAOCIaIADCeaIW3FK
4IZsOL2ruW6nXsfXhPC3IgKIwX9THAMLKzau7tXIh43r4bdCpAYnpmVQ0XNLlUQ2JAIIMBlaLJMB
w7bDA0mua8lAgxrUADT3TM9Qg1XigqD2I8kdgHmHnOOJfBewFgZxRwZA5gEktzQiBk/+Ms+6kPsG
VyFLhohryRxnjvDzzQ6ZrnQFEmOMlDfIp1kwrMqWTTI8QI8R2W4/kYoQ5JJXzuUV8kbu3N2FOACn
GZjuVDcy4RVL2roxvM6aVefOZjYEtDO1QYQJEuktM2TCFe6IakV6glqDoMsC2XCmPcJiAQwAAOYi
rXUaXBKJUvQh3B1pbl27YkA7pNeuJfJGVOABFYjUxRrYtUe07OoahADX0xR0dEx7VmM/4MAcgbVr
gQ3pgUjbIGRObbInwmGQ+NrMTH6ygnecnB7jsqQCAXdEYEDhIL97IjHgrwAIUGaI/NgjZy4IDESA
a/LS+TXidhb3XDJRmwKZ3QfHSJn+L/7erUI8uWeGgcobkuLywibNwZmysF+CaJA42tkJ38jIB0AA
ZOOXxhZxNHIBAAOITLjgrj5InQki8MjMN+aEZrNCSm1vACc9IwOQwQwa7hCQJrsBJzCBCW7t50hL
BNa/Toij8S0QJ+ubqsbszahtosdNmlojf/60RmYgAzIH4AaMXgiqK32RvE9k6Uqfc7RpAGp+x2bU
VWaIRDNwbnQj5NLVXYi6BcDubQ9AAQO5AdkV8uCqB7nzHWm5clGT8cdHj81zfIixPb7Wy+v52QUP
QMgREu9n03kANEE8GSbe9FerW+/uCnWI/U2ScN5Qiwsxdo1v/+wA754gZWZ4Q3b+fvWG7hMiQn+t
you+EWiz5unLp13kqfjIbzvkAbQn/Yb3jPAuZ7/3ChnA1rluZ78C1gbelmN5R34Q52wFUXyU1Fis
x3woEUbP9BHzh2Qit3MMkXV9h3+TtgB+BXgMYXgfMWfcRgZuFwKpES2FZhjZFRO/BEwQyGEO0Gcb
wXdl1n0GIYNmxoHT9lHfx3IqtnpJ1VoWJwCM5xqg4i2RFztzVxO/RFAfcWnatm1ax3MPgYGih4AK
wQAfpYFAp3QrhnpAaBAEeBBH92gN0QCZF24HRChHOBewc4IWAUY4BH0coWf05xEMB3yB1xHq80IM
gYXqFBEGqBBCF2Djp3nHV4b+D3WGQNVGijJOxKYThmVZ2ZZpEngR90cGeagR9WM/cpgQflh1yIVc
YWiIwodWkaVZVjg6sbKGbfGIO+GAN5SKNZZtdcgRZEYAd+gRABRAaHSF/ARmAZgRf+aFGoZemwZ3
q8KKaZGCPgGLz7UBmFaJBnFf27d/GKgRSvRLfeh/gJeJhedpxNhWiUV4xcQnjZhBV/USSiQCbyRM
tVUQOMSEC+GCMOiJDgVmCDED+shzwNcRFGRBIRQCJJgQHeB1f8hrnuZThxVa41MpwkIZ9SUT9BNC
vcgQLNgQT/WOFeF/+HgQ+rd/PecRZcSLDFGQIHWQH+iFE9cRl2aG9tQqu+L+dOmogrtIPyExUBpJ
EbOGkvmHhxDxPw4Rew2hgwxQNoMoECvXEXDVT86FjoujjF2RhEpoRgxUkRXlVSDxUda2ThHhjQcx
kT20EBQAlA7Bk9uoAgNhA10WaQEwim31VplVAiQgi35xMm/CGK54ExhgRg10k54VEifZkRuxgjap
EPTDiR/BjV7Jamb3XOjFMT8jdUEzkzmBRSE0EsMUSCHxYIKJjQx0melDmInpfwxBcOQVjgmBUwMB
bh8mjfCIQ9+kFx4kmVwhczO3E/SziSKRkSDhV6wlkgAZlgexiwEkkLK2lWbJhT7YEHRIBpaXmjb2
EDjZOUpDm1vRYFD5k1T+dD8gMVc5KVkhVVnAeUYLkY3CmYPI+WyoiRBwRX3daVFsSDS2mRfMOBQg
dEF++ZceMWu/qYuguRBL9J0RoZXJ+ZZu5ZoXIUyOJBfVmZ1UIZVGYZn/aVJY+RCYd2oxtVoSORJc
KRBq2RERKBLsJ6BfczTWOTgf4YYoUUbk6RCwqZmdtVMW6p4KgV8R8YkMEQGuFBI6yoe++IeLaVsu
iJkL2oryeaJYAaFLoY0OcQBPJRKY154ISgYnIBGkqRBhxJ0dcZiFaY9+FRItSVh0iZHxxBYNioJ5
+RXeKRIbpgG1OGkcqRDEaZUZwUPnWRBx2oR0+JxXKaNqc6aFkaZhEUv+dKURmjV/vUmUBToQ93mn
GXGfE2oQO9mZGZEBk/imeohRhao4JoqkVRORZ0GoJNpLuVZvgKkCGkipjBqco+oQlumoA0GgHQoR
VcoQIRoS7DcBIJBAPtoUgCo8gmoW7kgSsYVnGwF4RLmFA8GkH8GikXoQgSlcpTeP0OimU0oQsPlG
fjo/m6ijTDGbnloVwYoWzteq0jpdyioRB7BqqjqYbyQSV6YQ0RgRTxoSdkqngNOpgQqqbnEA0+lb
t+oRV+oRLeStC9Gjm2ly3hSJuviZ+GozvxoYkDcXc7WpGRGwHTGwHJGlDysQXNqxFgFaHECOGOGd
5uoQzvqsENtBDgr+FW3YskKhoDDKEFHqEIeaYQ2hZMjXV3mqEQcQAsTZiQVBmCBLEYqWrhYBnyBh
niebMfoKrFEHs0OhoN/ZXEjLVkz5EKEYin2oqO1KEQtUlViqQABUtEY7b/kpjx+ho1rqE0EUrlOB
OgoDt0uxrfMIl0hrER6YEDZwA7L6EepjQbC6qr9ktl5mrB1Rr0u7nYYLE3KLTSpaoiz7GAegWSUw
YyHRbMvpU2+3lSKBnwDKl4abivEqUIrbsGW7E+DqMHZyMVL7FReGsx1RdKoXAOt5EV8KuCQapEv1
dXk7ES8qTs1KlSorE0f6ug8qLcmCvGBhVx0hAoUoEKfZmxqbEC3+JLR4N3KCN3j5KbwNQUQou5ct
2jORybziao4OEbl3wVSKSBEnBgDKRYO4W70HGAIcCxK3qGXba6MNUblkcKEMwbAMUa6uOr6Zs7r4
wywe4xmle3KheLsTgayKyhBz+hE7p781irY225xkChHB27Qu8bZ0CxaLMinqqxeXdVskW3axhhEh
0LcCIatfSwZhC7pjto9+p6c0urGeBMIqgTYj/DXiEkWfUbmaBVq3xXKlqBCaG4g/WBBE2RAUlEWN
i0RkYIP9KIkHeq295IAzq7qdar5ReT5ivBbcuxBz5mgOQbsABsEWwQAL8BCp6xEcuHUh2YIHiqvD
CsZPO0ppGMT+c6HBcGZxOzsQ0Su9nKfE8osQ9Ou+hae9jmmtIipG2Gu8TAPIZyEo8VLGegFtTnyA
FbG1yPUQPYsRIICD/FeBd7jIFbFpknyTZWoTIszJYeEmJkzLc+FkNEADY8h2vNaYDYGFqTrDEnED
O3fHCXHBrEwRJcDBAtXDNAHEuFyiojLNbfGzbzdk6gZkwHwQIVADfeu3E+x5PKd9C/GRZVbIY/q/
ejRdIOGAD+i0YYxm6WvNcqFkyywR46d6n7yaeEqUoHfD1pjFCiEDF0jQYkgRusbFZFBzC/GzK/jF
L7Mz9vyn6SsbkYbQFxGGbRwRGujDCcF3dhzQDGHHDUFkSub+EAv9fod2bBb5Si0xy82jLhXdFnu7
X9BrEJyXzyihf6mcbkFmZoVcEFusEP5LBnbn0jkhzY930a+xeTw9EQ881BZBjQ/djQLx06lHyBZq
syQweXdHvhRNG8iCyXSxy0eXe4NMETeNTg/HEMY8cshcfqa5uRwhUQFVNA1aQrIBk6aBzdncg0Pt
a2QIaS18EQdgArV2Ag3ck7hozhnBWermyx0hfbJ8yTVNneqiGxaHwWv8X81G1V42eL9LADgM2Rkh
AkQ2hlFNU5pEvkfjUrhxKpk9F/xM2QmRlP2lXG48EaT9ECLNcyTNaQIBv71tEYfm0E471sJR1rUN
F6yt0Qf+mNMGIdoVccYO4dOo7c8XEQM3Z92kKhClFtYnIdPG4de0wXiHCBKW2r4M8VDEbHTX9xCt
1hGWi9fkTRJMrRzODRtu5279nBF0yNAC0dgY0WJKJt1A2M0bMXmUhzL73Ry0/RrL5nLq5cxGvdgn
QGm/GxHcFmStvXl6t64EkbsOMXvljdnPvTK0veJpwW1+19oq7VZP+F6qhbjC+GcQQXArxreA18gK
AXAjAUVmPU5O/Rp/htsXcbNDOqA/9xF1vcRAKNocGd8QTtEu3j40jeSTzRFsVdSJJlMd3r8DAW3g
baVeG82Pa0hZ7kBHrhrqrdZNmGljXhIThpQ9fqqea8n+WB4e6H0a3/x2dk0Ql1YRBr5fB04G+CwS
yXrAzD0ercLXoJGKeube8oq3dc4QmoV5BI7IQRZxPrtqM7HmRNXmaLg5tjHg9PaYF77DilzYGwHD
QE4Ssu14kP7msdGmBH6o45jps+jOgKi5B7HOA1HKIDPPI7blsoGxDPHl0anFr7zj610Q4jVZFFHl
x97H8vHnr8HsMxG70b7jeX4QNzDrnpjmQ47Z9wGTpj4WB0ACeZwT8T6aJk7KfxsS5o0fy9LuY6Gw
8FSkvbTpl1boiUlZi7oQfmjltk5W/sHurnHoF8Gb0YXhHKGV4Qnbkxsg+94aM+brC+FVajvjTd4R
B4D+hSfp8Smq7gbC7ahxWZiF8grxr9gW7rFOBpN18CiR7yvv8KlxuQxJod77EN6uEUj1WzAR4QvC
8qThvyt8EUorEfM+7FGF4/rSoPze3C3uHPEk0RuR3N3EXP5+7I8+IZJOM7MRvBTxSF/lEaV2ARPB
AR0wsk2f8dBS5GqW9bCh9ie7ph8BUErtECI796479hliK1evpnxfWPrJEXlk2YmG3epH9x2y74fP
FYRqsQmR+JXt92cr+LfJ5iWi9KhBtTqF+Rbh+DMhwmX/If29GtEE0iORSPF39EifIqJPGgSsx8jd
0vmNMn1OJrheGjLPEeGUQxMgixW0S3//w9qOT/X+fBoVC/sGQbXmOnl5zfzNLyOGfxoyK/0F4Yz/
hPopTvg1svGlMaLv7ErxHBHin+7IziO37xkAH0yuZPoJMVHZTv7wj/fIcZFNo+IAQUbgQIIFDR5E
mFDhQoYNHT6EGFHiRIoVLV7EmJFMAoccNX4EGVLkSIIVKliUkDLlAZIYE7wECbPlTJo1bd7EmbOm
TIYedf4EGlRgBJNEJ05AijSl0IQ8M770yVTqVKpVreKMqtDpVa5dEVIASyFChIlhKSi1CjVmVq9t
3b6FK3Vr07h1qVawYLKCWBEsH5pFSlXtx8F2DR9GnHgiW4SMFT/+aOFC3r0Uw06QIBWB44pzIX/+
Bh3aLeeCpEWfXljhwuQKZCtmlrvWNGratW2P9Gww923eFvK6VvwSgcbCvI0fR35x9sDlySGPFQvc
bnHlzZ1fx558d+nstMHujT7des/t3c2f5928PHq4ek2KDeHXK3Xl7O3fP75e4Hj8d32/f0u/h+jr
r0ADg+uIvwOB+k+s+RIYjjAFF6SwwtgamtDCm8CCLS0BE8xQQxFH3ClBEjX80MQTV2TxQgxbLDBF
8kKEsUYbJRKQxhshk3GhHncEMsiOVBQyvR8bO7JIJZdkTj0mUUtStyifpLJI9XSsMigCKZoySy+B
jPDFL+HasrMxz0SzNCfTvKpLNbFkM04Sr5T+k6kyF3OzTj013GzIPXOCkyAI/yTUSzoLJenOiIRD
tFEqc3SUuDz3CzRSSw1c81IcK91oUk0/ve9QULWaVNFRTz0RUlQF7TOmVV8NMkwfOc3S041ahTXX
Gj+k9UlabdU12OwytdTUAYEVNtnrRC3U2GOVhfZGVf/01Nlor6WwOVzZZFTSXrEFd1liv7QWw2/D
RXdZP2u1Fdl033WO2SV7dRdee5Gz7tzzymVoM33vBdi4fIWstt6ADxZY3hW7lRRhh20ceOGC/324
4vQGnPNXii3m+LZps9W4Y5F3XRfTkEdGuUWF9504ZZdVHnfYQSWU9WWbT6yZru7a3fhmn2v+W9lj
Tvn9uehQMU74V6OXVhlpoDXumWmpRcsx6p22dQnrqbcWMeLHiJ6Va7FZzNdqCUMCe2y1WXY6rpbX
hnvhth9UOm675SayTajv5jvVmO2sVuu+B7fwb53Sbspswhf/TD+DfUT7ccYnP83rmxBvjHLNU507
UZ4V3zz0xKpu6XPRT5+z8+poFRx11xe03CLTX6e9a21pnPns2ncfMXZzT+Y9eBRVPwjz4iUXPvnG
g2YuJH+Vh7531Rl+CvTor0fMa+OlxL5720GM3HrvxzfMcC7FJz/96cRcXX33UTQN99zfp79C0kJE
v3796+JMwe33B6DQMge+ABbQfgfJ2fH+DLjAwukmbAyEYLZk5Zj/RdCCtvEJW5B3QQ6Obj8DeV4H
RQg7qGxwhCfMHgpVuEIWttCFL4RhDGU4QxrW0IY3xGEOdbhDHvbQhz8EYhCFOEQiFtGIR0RiEpW4
RCY20YlPhGIUpThFKlbRilfEYha1uEUudtGLXwRjGMU4RjKW0YxnRGMa1bhGNrbRjW+EYxzlOEc6
1tGOd8RjHvW4Rz720Y9/BGQgBTlIQhbSkIdEZCIVuUhGNtKRj4RkJCU5SUpW0pKXxGQmNblJTnbS
k58EZShFOUpSltKUp0RlKlW5Sla20pWvhGUsZTlLWtbSlrfEZS51uUte9tKXvwRmMIUyOUxiFtOY
x0RmMpW5TGY205nPhGY0pTlNalbTmtfEZja1uU1udtOb3wRnOMU5TnJCMSAAIfkEAAoAAAAsAAAA
AIAC4AGHxnAZ2pkW1rIcxL4po8JLlJlqf3+Dfn6Lf36Afn9+eY94arVwWLx1OruGHa6YEqmiDZur
AneyAWC6AGHJAIPYAKbXAL3aAs7jBuDsGOXgM+rlQurySerrWe7eauDeec/ufsT8f9P9f+f+gfX8
h/z2k/7pnf7fqP7TsP7Kp/65oP6rtOah5rCI8p179rZy99J3/OV0+vN16fVv2Pxy3v6G4v6W2/6h
0/6r5f7Y/v7+/v7+/v7+/v7+/v7+/v7+/v7+/v7+/v7+/v7+/v7+/v7+/v7+/v7+/v7+/v7+/v7+
//7+/v7+/v7+/v7+/v7+/v7+/v7+/v7+/////v7+/v7+/v7+/v7+/v7+/v7+/v7+/v7+/////v7+
/v7+/v7+/v7+/v7+/v7+/v7+/v7+/////v7+/v7+/v7+/v7+/v7+/v7+/v7+/v7+/////v7+/v7+
/v7+/v7+/v7+/v7+/v7+/v7+/////v7+/v7+/v7+/v7+/v7+/v7+/v7+/v7+/////v7+/v7+/v7+
/v7+/v7+/v7+/v7+/v7+/////v7+/v7+/v7+/v7+/v7+/v7+/v7+/v7+/////v7+/v7+/v7+/v7+
/v7+/v7+/v7+/v7+/////v7+/v7+/v7+/v7+/v7+/v7+/v7+/v7+/////v7+/v7+/v7+/v7+/v7+
/v7+/v7+/v7+/////v7+/v7+/v7+/v7+/v7+/v7+/v7+/v7+/v7+/////v7+/v7+/v7+/v7+/v7+
/v7+/v7+/v7+/////v7+/v7+/v7+/v7+/v7+/v7+/v7+/v7+/////v7+/v7+/v7+/v7+/v7+/v7+
/v7+/v7+/v7+/////v7+/v7+/v7+/v7+/v7+/v7+/v7+/v7+/v7+/////v7+/v7+/v7+/v7+/v7+
/v7+/v7+/v7+/////v7+/v7+/v7+/v7+/v7+/v7+/v7+/v7+/v7+/v7+/////v7+/v7+/v7+/v7+
/v7+/v7+/v7+/v7+/v7+/v7+/////v7+/v7+/v7+////CP4AyQgcSLCgwYMIEypcyLChw4cQI0qc
SLGixYsYM2rcyLGjx48gQ4ocSbKkyZMoU6pcybKly5cwY8qcSbOmzZs4c+rcybOnz59AgwodSrSo
0aNIkypdyrSp06dQo0qdSrWq1atYs2rdyrWr169gw4odS7as2bNo06pdy7at27dw48qdS7eu3bt4
8+rdy7ev37+AAwseTLiw4cOIEytezLix48eQI0ueTLmy5cuYM2vezLmz58+gQ4seTbq06dOoU6te
zbq169ewY8ueTbu27du4c+vezbu379/AgwsfTry48ePIkytfzry58+fQo0ufTr269evYs2vfzr27
9+/gw/6LH0++vPnz6NOrX8++vfv38OPLn0+/vv37+PPr38+/v///AAYo4IAEFmjggQgmqOCCDDbo
4IMQRijhhBRWaOGFGGao4YYcdujhhyCGKOKIJJZo4okopqjiiiy26OKLMMYo44w01mjjjTjmqOOO
PPbo449ABinkkEQWaeSRSCap5JJMNunkk1BGKeWUVFZp5ZVYZqnlllx26eWXYIYp5osJjKlhAmiW
aeaEaapZJpprPghnQWqSMWecCN5JJ0F64gkgmgjUeZCgAvXpp36GIkToQIseWl8CCEDUaKGTOspe
mxJVSqml7yX6kKaMgsppd5heJCqjo5LnKUWnoprqd/6rTpRmpJ+2+upypWqkp62b3jpdrLIaCuyg
vPr627CSAovsnsYil2tGy/Zaa7PEBdpRmqxmSiu1vGG7UaDFEhtRtNyq5u1G5DaUbrjljpYuQ+d6
VOy77XYWL0bglrQuu/Vadq+p1qa07bT9ivavqfzqGm7CBStGr0IHr7Rvw5g9i1HEL01MsWQPQ8yw
SfN+vDFeHStackoLj5yYxQiLLHHIKhN2skEY/6RxzHzly9HMNS3sMs5fAXotzze9+zPQWhEd6tE6
3Yz0WpAybefAVjn9NFk1Z5r1VD5fLdbW40pdFL1iew2U0qGaZbTZWYFdK9pOWc123HDDzXWmc9Mt
tf7bZcmd91B12500zH8HBe7eZXvVdeE82c13XGszjpPjifdNuOQxPQ6v5ne9GzDmLyPuGLuVgz7o
59+W/pbRqpseuOB2sW66vIFvFvnsLQ/d+l6L4x622LAP5rfvJuu+u2DDE88ywq2lTDyfwAf/WPKF
c76Q9QZfLvnrujn/N/YJSW9771eDH/7xClVQwfTkq2w+seI3FEEEFMy//ujeb0x5TAeIEIL6FaBA
/SLTvnK9j2bxi8j/LADACHCsgLc6IAJzUoELMHCAk7ndq3SGLgmOxAIMdKC/tJWq/aFEAgKkCP0q
EIH7VUZ2fuKgRmRoEgnY0IYSAWAARXgZDYbJg/7Qa4kAJ0BECTikfyKoAAjVx8OKaQ1MQKRUAhUi
wCEaESIVvAATOQNDLZkQJgeoIgUmMBELaJECV+Ri/qgURTtNESJWpAgLDfbEKX2xIw+4wAUeUBEJ
FBEkZOwhBI+0PIu0kSB6tOAD+CiRKk4Ahxyx4SPT+MI1GolyrcsABjCgSUZGRIxo7AgRi0jJF9aR
SG2koUg2yck9TkR9VSwlRiYwxj9mhnTo29AdT7LJDFwAAhI5QAhi6RFHPnJ8svJRGw8JkQxkAJgV
OWYx42ivYOGokBU5YAM60AGLPCACevyIHwM5ET/68TNkyyWDMKmRBrjTnRTR4yI9uZEbQjIio/6c
JGjIBqNDwu2d75yIM53pSo7kU5YNoeUoEWo7a67IbqrEyDa5GVCJDNSX0NRIPvX5ySFKMzT8PJE/
S8fNDsBzIpx0Jj01utCJOJKhnuliiOoW0Y6UtAEMqIhKD+IADWigARRZKEwXMsqGHKChp9TlMtVJ
hgY44AY3qMhRDQLQk0bEnkOtyDYFUgJ7ke5M7FTJRMlgg440wKcVxScpsyqRqu5zkA4S3BupClAy
TFUjGugAWoEqkY2yFSJV5es+HSqnsFpkqxQJbEfyqld3dlWtttzIRDlg1bcms0Fy/ZlbJXLTyuL1
p0AtQQnumtCWcmSiJhUsHZNaoKUqTbGcpf4oAxxwEAHYdgATqWsfQdJZ0oL0qwQa6UcYC9qJ3HQB
BxmAcgcQAAFEBLY0AahoTyNT/oy0ciUFbQoucoOyEsS24A1ARHy6V4844KyqHa1DNosaXO6HmQnk
5k9p212L+DYGMQjvePVaXLNKd7rr3atnSxNS+2Q2l571bkbwm18BxEAieZ3vY9tJ3gEzZKL9XU11
3eNapja1mwXxrUXAKxD8jlew6s0IeTMMEflaOCE1EHEPCXup6LmEvR1prgBwW+KYYNipFGksQnQ8
EBrUoAaWxVt6sMmquR4EuhxZrgACwGMyxEDGE2GAlnMK4Z9+JADNBbOVCQxX7sDXwwfhAP43N/Bi
gVB5x859CHhJ3JEtM0C1DnGAnvU8kBRfZM5Tbu9lwXNgkDxgoC3ubAqiWlvlBvoh+J2zR7i5ZTwv
pKca2LNoJ/xnAcBAv+0t868yK5J5LjIi3KQsbcmqYIEAmrmQjrQAAFBnFaigA1puwAl2fQIQYFkg
K860R2Q9aw3TuDqFHslFTw1YS5N2ALKGNaRtGwAGc0QFKVCBlrvs01VzxMHUJkgNQvBrrw5aOh0+
ybIfsGmOMNi2D7ZIvAtCZeVG5NZcHm+3QQJm2wrEyBoWtXF2aZJlE6TcEskvj+dNkSsTZLkD2PFD
cFwSGIjg1+FtLg1eA1xcca8lOw2JpP7HvBGI23u9FM8IkQcCg5YzBNDihc2Gg8PkJsfk0BkQOait
jHA5y+C2VWZISe9s6YuA+egCgUGsdx7MarLWN8mGialXuhGYewTaP1duqxXSWV2fwAQm8HWnqR0A
pce6wQuh80COjOSYdrxbpKbJQPdI9QU3+NEdAbpAoCp0ihZ97LaldUQaHHOEZNzKMdi4uwTumjOj
WSEXuOgeSdBuhJy3zQXB76cd/OXlEuQGYlcI5isCbn9/BNB4N83bZ4NJdVKgmQN9QEbt+uR3ntch
aCe5QnZ88oVAXOIyAa/gCWLxnqed2AF/OmuEqxI/ovH1DTE4Q1Y8+oQw3CC/D7rhgf6ufY3YGSI6
jjMZWm52u4d7+cdOjWFVolAbhoDci63w3xvi8OSa/OU/571H7IzTgdhg3DKWcZ5WflW3eQhhfLe0
emRmYy4BSvfEERE2Xx8xA1nXewkBbQo3AFuHEQyAa0QHVYyWEFbXeXC2dkcWAupnK8yEGNcVExQQ
QAL0VxSBVrTlZxqBdcpFAA0RcRG3dyGIEbaGa9XnandXeBSBZbw3ZYmneM1zPXPyeLFzZjUBSx9l
XnvmbR0xADMQcT8YEaCHgAqBbdp2Zw4BAzGwecM3EQT4XSMoc4tyL1A4F7CzghgRg9BnhVcIEryH
W12oEUrkQgtxa0M4EEwngqaXdP4uZ3jRhnKDaErSwixqVDZ0mBFrRU4QuGJYWHI56G99eBH1Mz9N
JHog9mVHV3aJuBDvJn6it1miBYbsoylx2BZRpxNi9EihtxGYmHMQsW2+d38doUM7tBAUB4CAl3r0
d4gLsQF+1wAAZm5uFD4JGD2xCEcvBRLkpWecphB2lm8IQYFbaIF+qEcMNEerCFCLxncZ0YYfUVKU
NX/+8oaK8o7SSBMi4BC1+BCS9IAKwWdkYIMJsY3ciH0yIAM5+BEXgAEX9H4oiBBd5xEDeH4hphEl
ZVKZKEiVIiyUEXcx0UIsZAEPQU0JhVW8NYa8qBCORlYeYUYh1Hcd0I6nB5EsV/6PkpVayKQugjKN
YNGCM6FD8yMSfgUStkaSENGJCEEBDGRTfpc4ajd+ayhRKUdAMISTXCGFNqFE4xiKoiRUQGlrJfkQ
RFkQn9iTCxEBR4lyF2EDSFiK5PcRgbVpJOCKgHEyb8IYs1gT4riSIXFQItGBXckRwIiVBDE/nwgS
dYWOtaWOi8VfjSgQRBSXP+NkObl+OSGO5JiXHPURuXZnAZkRWXSV6QNAGHRa7qSZabd5yDgR5ZZd
izlO56QXHgSZXVFzNgcUISSTgCSSmLmNBomQ6pM+S7RD78cRHZha7lhihAcRmMZXzciQQvYQByWD
agFEsDmVkjiJIBGWgLkRP/75EUG4ZR9hRlsEeVoUQNwZhNU3cozoVMyYlx4FnWpDNLLpmpIJFC8I
mtlJiXo5Xg0RlLkWEgu5ECoZmsJpnsVZEfJXoBZhTBIAAnKhNNO5FVRpFFYJS/c5S1r5EHrmVBrA
EPi2mRc2igDqkTBBaYKFlpdYXiLRnpBzNA86OB9hnShBmXfYEChkiQxhWnl2hRV5ECeQW+/koQNh
P2IJEkrUEIhFBl9poBxAgyMxTjYanfDZolgRoUuxRKFkVPnonhMRbDtqED36XD/qjjxZoRbBkWRa
VUlqERU2EHDpEM/JFg4qlVxTl1/xpiGBiV2KEUPXlwRhlZ7pEfZ5n1DGEf466gCVl5U4+p4sKqdS
QadhoaAgMV3XmKcXEZQmBaQCQZmVyRG/uakFMZGLiZw6mqIq+p4dxKhQQaVmAakeQVr7BhI3wJVk
mBAWgAHh6RGaep+giqBeOn3klQGUOkvGxKAPwZGAyBRxWhiOxxbVOBK2x6tDyWh8ihCeyql6FEBD
1VkT8aUKgacSMU5uOkZaCoqgiKxRiqpP4ahpkY9PeloCFqwQcQCttk2YihJ/aKTQShC61a3dBq8F
gZtECpozahTJKjMa6RYHYKfWKH8h8ZQZwZEDixDwR5gOSxD8CFmXCajjWK1BIZ3o2hTLOhcKFVkf
UQIulq9LmRCD6odVNP6kCAGxIDGcaYWoifqLFnSrQhGnH2uuICGlSMGq+OplDCGpaAV+pSh0t0aT
GyFMC9RAVCRAglmefmeZJPudeJmzi2qw1bmzQEFLtSSDKxuRpDdnYqYQC5BtStsRKomzBvGX64i2
oQoR+QkSgslCx7oTHksYqKMwPusUjTlxAiYSqJeGBWEDUGWeIFGr41mha8uxGTG1IQGwH6FDAqoT
e5tNMPo1i8q1VXEAm2ayJwsS5HeGMHlwbWcSS0Smiqs+f9WmAFWvFzFJNxQSIDSOEdszUeowdnIx
nMsVxBW3DVF+c0a4koVTR6oRqeuVzbavHeGkGau2lEmmLnGudPmIb/6jGZCrESKwlgSxch4RtgZh
rLBKBj24EEMHvG56oR+ZQg0hjleKuwozPXxyvZxRsRGBZaVIvBkhszN7cCiInbeLETawh91HELcm
iLzquZCljwshSY/UrgaRRNKLMq/Zu1VBKKLSt24BvlUXXvpLESDYAeYJu//Dkx9hcqpoEB2IwA8h
WslJowy8EEBrMzqbQTRjMhZMFpPVvyIoEYOLESFguAPRAATKEI07wT4MXie5im31rB8BAg54Nkyj
wVgjLlL0GZ4rWiaAWkMYfimcEOTnaaWLmgfBANqGoLX6p0tLBg5WgQsLWvl6RFDcrI2zuU6Ew6ih
rWlHtsFLiMLXEP6n2RDD6RDJ2xF8JwMKZ4QnymIdQceTU7C3BD9UbBc8fJh8jBDcKxH9ZowLkWv9
hxFtWhBRtWOKDIFLKoEgYU5aSsE7k8NBAz03iRsMZpoJEcpsSHaM6J0ZAQKGSb4PMcCOVsAX8Vhr
CkjqOxMe68o5ab1pExtHRgOKJ2ul3MGF+I97GscLUV97uIO/V7IlkIfXeY/IPMXKrLkZ7BrCdLrE
F8gb0XJFKLE1YLhQZcaCCLsUkYMEAHwmyX21bBGF+hHDJEar/KI1TBqtMsmBoWPNxRHkp3SlN820
ZxDdic3cLGX458bWZ6CYCHsMIUz1GYMZQ84p6BDlPBdk+8UU0f6UKSvIs+oRFGjRDDGQpIyKMzip
D3FoBcUQxMQSydyEmyMbqAfRD9E/TUkGCk0TMxAD36gADjHTDGFiStwQ3nqAEyZP81THrRwbBw0b
+YV8ekh2Qn0R3LQQBwCCA/GNKH2Dy0Vl0feqClECJEACF5UBdTfOWc16p4LQdgHN8WaGY/xwKw3I
lyyalXwQ9QVxOoeeHSF5dR3Si0o1rEfSppHO6uxqnAzYU7bQEPFpphnWR2QCvHYCHIx9A0AA+SzM
TUcQqZjWGLFss5c5Ir0byFLSejFn0sYQa/nQH2wR5wutKLwRIjBvqejZFoFo43w0NYUbea0bDvbO
C3GKls3alf6Kb4340ku8EcKde4Zm3CF91zSX17RNFzQwy/p8EEStEmJ4Z7bijaVNuLas2m7GzvZF
EFPX2CTR0wMn2bSheA99pz6VWKQJEZ53ECYmb1MWcZqtEZ+7bi/j3c4C3rDBdt0b2BjxzxHBf/Y8
eH6cxLdF3BQx1/ZNO7HdHMuNzgZx0h4xqfB6AKF9Ap48rRfxYHAm34qo2Ha1ddvEAREhea8dEmiT
ucsH4bOBmCq20ahG3RnO4QgOEcN9EPLcVMwbfSEnElGk14OlLrPh139NEZs21RCR3i39bbYNEc1N
4wIRWBQ9Ej9u5dljk6/BYKRbbBnhqv3KWbK6xgORiqh9gf7EzcXo+6KXa0jhrRlbzRpMuHkenlsZ
muZhbndEeJy8tYyw3cqDzkX6fRohcGSA+98+GuUX8d55nueXvRF6PL0jLh6tAtmhAZcAdXvcxqQb
AWCcruE6tufBtIFA5hKB3mSV3uY/bRvvuqWh2xHfDM4RIWUJrhFCfOZjvRLJrXzmUeizcVYV5q99
Nl0uZu0RYeFkDmgGAep7lwL2S9CnCh+z3ettEYG5blQFUbTDZeRM7tUEsYGd7ukEnbX0Ie2vUQIR
9uck4eVyJs2GfQM5nlgNSeWnPh8Hje5ocQAkAOX+PhIAv3SsPe4I4ec+XtD4sSwMjxajbRFFdb/T
1VM9Rf6xFn8Qpe7gvPsfC/8aagbHHoFVA13sxn5aB9/EaX4+dhwgHO8aqpnzCSFUA00GNHixa3zz
3d1BB6LvqcGO666dc6tvsM4RZZXyPK3xBsLxHQ8WopW9BnXMEDHxGsFoT9/gSo9Zlz7Z2WjMz/sQ
8P7t3EXtV7/zheXmtPG3fXRDEJyjCqGLWmXvCK/yEaLqgzIbrLn3RLVWhobTIa6yJw8tWF8h5w4b
CouxVasRinTVr47KGS/4F6KCr7FRVeicUc8RjC3sKHrv5f4hWt8axoT4iX/5GtFLvtT4CNHv2p4s
nu8hTI8aXiv7pD/0DcFJrdTjbl/2vPvYKDL5rCGuPP7RSrYPMmveIr1fGpJ7E9wNE+S89eVR/aIh
+sKvEM5HRLd401On/fguIy1vGr8P/LEru7CPEHOX0yqRtzYC+qbhUfE/EV4LkrAXewBBRuBAggUN
HkR4MEGChA0TLnQYUeJEihUtXsSYUeNGjh09frwIUSJDkCVNnkSZkQKFCRMkoFwZ0yXGDDVrPkiJ
cCFJjztz/gQaVOhQokU/8nSI1OhSpkJf5qRQYeUEjTYfQBDqE6TIpl29fgUb1ijXhmTFnkXbdOrT
jA9wBjXLUWtaunXt3g2r9CFevnwrbJQgwaXgA3bn9tTbV/Fixo1HJlboWPLSCBWk/sXYsmXgunE3
Hv6eHFr06M4TPZNGrTJmhAiq16IFLRdyatq1baM8bXD2bd4FLf+mEEGEiMIUY7Jk6zX259y9nT+H
XtZ0dOpkLFywYDk4RpmcvSLYjbF5dfLlb4cfiN785AoXsFdorXHmV/UUl6/Hn5/0eIH89S+uIDsK
RlsIgaP8+y9BBe+qj4wGF6SLteDia+w+8R6EMEMNlasPww2/0m5CxhB8zMMPT0QRLtNMTHGo37SL
IIQQiuuMxJFaxDFHDqfTES0LspMqObpsjMjCHo9EsqQOWUwSpAClojCtApVkskkrr9SJRyyZokDI
vIhMCswtxySzvxXL/E/MsqpEs80mG2TTzQrjJP7ISDnvbBNBOvE0bM/+/OQz0BSXFDQ1Oys6tFBF
sdRz0cnUVAhSRyfFkVBK8Ur0zEs3ldNALTn9ElAHQSU1zw5L3ZFKUVFldT1LW81KUt1khbXW/8D7
1NaTRE3AU11/fVNTYDvK9DFfh0W2x0aTDYnWOldlNtrnTpW2SECLrTbbNIXV9k8/se02XPyWzbZX
XsVFN8dj15TW2TpxTTdeFEmE1k1e65U3X0NzrRXcNfHVN+D9uEXVX3YFRnheakt119uEHx50Ingv
nfJAgCHGmMCFFTX4oYszBplAfuXs2OOQT474MT5XbRhll22D096Wwfv4ZZsli5nMlku+uedpX/5N
suIDfSZ6XvuQ5HnWmotm2rGcK723aalPJJfqqKfG+sONM2zZwaWzBntEgvVLuqCyw0Yb5q3NExqx
ddOGe8G3s3T16rjv1hBo6HbuGm+/Bx65trPr/LvwDZ9W26TBDWccNT2/BspcJSduvPIFEce5674t
51w0OCEfWtXOR+cac0yv3Zx01UMzXUrNV4c9b/tAH1s22mPHvcbAm1rcQcpzBz7BtZfq3evgjy9d
Zd4VTx15550+uqjib3+++iGjj1zz5q3nfrHHc9Ke+u7Hhw17i036nXz182v9QubFXz9+sRBMH9G5
mZM//8vNX9Fu/f8nG/88di/4AdCAYPmedP5KQrMDNlBBrWsbsQroQAoiEHvTm2AFNZgqaxFwgx8U
3u7cB0ISbqtIiMlgCVXIu/BUKYIrhKGrFCieGNYwhHRD1PZsuEMGQeZzKeRhEIl3kPuZDYhCROJY
dBOmJDaRfcfyoQ6dOEXDpGdWVMQi+8wkEAZm0Yt128kRvzhGooiRjGdEYxrVuEY2ttGNb4RjHOU4
RzrW0Y53xGMe9bhHPvbRj38EZCAFOUhCFtKQh0RkIhW5SEY20pGPhGQkJTlJSlbSkpfEZCY1uUlO
dtKTnwRlKEU5SlKW0pSnRGUqVblKVrbSla+EZSxlOUta1tKWt8RlLnW5S1720pe/BGYwhYQ5TGIW
05jHRGYylblMZjbTmc+EZjSlOU1qVtOa18RmNrW5TW5205vfBGc4xTlOcpbTnOdEZzrVuU52ttOd
74RnPOU5T3rW0573xGc+9blPfvbTn/8EaEAFOlCCFtSgB0VoQhW6UIY21KEPhWhEJTpRilbUohfF
aEY1ulGOdtSjH/1KQAAAIfkEAAoAAAAsAAAAAIAC4AGHxnAZ2pkW1rIcxL4po8JLlJlqf3+Dfn6L
f36Afn9+eY94arVwWLx1OruGHa6YEqmiDZurAneyAWC6AGHJAIPYAKbXAL3aAs7jBuDsGOXgM+rl
QurySerrWe7eauDeec/ufsT8f9P9f+f+gfX8h/z2k/7pnf7fqP7TsP7Kp/65oP6rtOah5rCI8p17
9rZy99J3/OV0+vN16fVv2Pxy3v6G4v6W2/6h0/6r5f7Y/v7+/v7+/v7+/v7+/v7+/v7+/v7+/v7+
/v7+/v7+/v7+/v7+/v7+/v7+/v7+/v7+/v7+//7+/v7+/v7+/v7+/v7+/v7+/v7+/v7+/////v7+
/v7+/v7+/v7+/v7+/v7+/v7+/v7+/////v7+/v7+/v7+/v7+/v7+/v7+/v7+/v7+/////v7+/v7+
/v7+/v7+/v7+/v7+/v7+/v7+/////v7+/v7+/v7+/v7+/v7+/v7+/v7+/v7+/////v7+/v7+/v7+
/v7+/v7+/v7+/v7+/v7+/////v7+/v7+/v7+/v7+/v7+/v7+/v7+/v7+/////v7+/v7+/v7+/v7+
/v7+/v7+/v7+/v7+/////v7+/v7+/v7+/v7+/v7+/v7+/v7+/v7+/////v7+/v7+/v7+/v7+/v7+
/v7+/v7+/v7+/////v7+/v7+/v7+/v7+/v7+/v7+/v7+/v7+/////v7+/v7+/v7+/v7+/v7+/v7+
/v7+/v7+/v7+/////v7+/v7+/v7+/v7+/v7+/v7+/v7+/v7+/////v7+/v7+/v7+/v7+/v7+/v7+
/v7+/v7+/////v7+/v7+/v7+/v7+/v7+/v7+/v7+/v7+/v7+/////v7+/v7+/v7+/v7+/v7+/v7+
/v7+/v7+/v7+/////v7+/v7+/v7+/v7+/v7+/v7+/v7+/v7+/////v7+/v7+/v7+/v7+/v7+/v7+
/v7+/v7+/v7+/v7+/////v7+/v7+/v7+/v7+/v7+/v7+/v7+/v7+/v7+/v7+/////v7+/v7+/v7+
////CP4AyQgcSLCgwYMIEypcyLChw4cQI0qcSLGixYsYM2rcyLGjx48gQ4ocSbKkyZMoU6pcybKl
y5cwY8qcSbOmzZs4c+rcybOnz59AgwodSrSo0aNIkypdyrSp06dQo0qdSrWq1atYs2rdyrWr169g
w4odS7as2bNo06pdy7at27dw48qdS7eu3bt48+rdy7ev37+AAwseTLiw4cOIEytezLix48eQI0ue
TLmy5cuYM2vezLmz58+gQ4seTbq06dOoU6tezbq169ewY8ueTbu27du4c+vezbu379/AgwsfTry4
8ePIkytfzry58+fQo0ufTr269evYs2vfzr279+/gw/6LH0++vPnz6NOrX8++vfv38OPLn0+/vv37
+PPr38+/v///AAYo4IAEFmjggQgmqOCCDDbo4IMQRijhhBRWaOGFGGao4YYcdujhhyCGKOKIJJZo
4okopqjiiiy26OKLMMYo44w01mjjjTjmqOOOPPbo449ABinkkEQWaeSRSCap5JJMNunkk1BGKeWU
VFZp5ZVYZqnlllx26eWXYIYp5osJjKlhAmiWaeaEaapZJpprPghnQWqSMWecCN5JJ0F64gkgmgjU
eZCgAvXpp36GIkToQIseWl8CCEDUaKGTOspemxJVSqml7yX6kKaMgsppd5heJCqjo5LnKUWnoprq
d/6rTpRmpJ+2+upypWqkp62b3jpdrLIaCuygvPr627CSAovsnsYil2tGy/Zaa7PEBdpRmqxmSiu1
vGG7UaDFEhtRtNyq5u1G5DaUbrjljpYuQ+d6VOy77XYWL0bglrQuu/Vadq+p1qa07bT9ivavqfzq
Gm7CBStGr0IHr7Rvw5g9i1HEL01MsWQPQ8ywSfN+vDFeHStackoLj5yYxQiLLHHIKhN2skEY/6Rx
zHzly9HMNS3sMs5fAXotzze9+zPQWhEd6tE63Yz0WpAybefAVjn9NFk1Z5r1VD5fLdbW40pdFL1i
ew2U0qGaZbTZWYFdK9pOWc123HDDzXWmc9Mttf7bZcmd91B12500zH8HBe7eZXvVdeE82c13XGsz
jpPjifdNuOQxPQ6v5ne9GzDmLyPuGLuVgz7o59+W/pbRqpseuOB2sW66vIFvFvnsLQ/d+l6L4x62
2LAP5rfvJuu+u2DDE88ywq2lTDyfwAf/WPKFc76Q9QZfLvnrujn/N/YJSW9771eDH/7xC1VQwejk
q2w+seI7FEEEFMw/vfcbUx7TASKEQIb6FaBA/SDTvnK9j2bxi0gIQlABCwAwApGRHbcOiECdWOAC
Dhwgx/CXKp2hi4IksYADIViZhVHtUPpDiQQmwEKKzE+DJSzgmDyoERqaZIUTkIAOJQLA+pHQX/4c
BBMIodeSCQiQhRJwCP9EIIIGOrACP7yMDLM0REolUCECPGISI3LBJ0ZRilOkUgphcoAsUiCHExEh
FD1zuypV0U52uwAGMFARI6KRIjBko9bEGD2QWOABf7QARXSYwy3aRoJMWp5F3kiQC2QgAxfAIB61
aEiN4HACFQtikSjXugzMcY6ClIgZz1hJjLCwkJis2B43CTcbikSOc7zAAyYCAgoE8IwdsSMSNUM6
9G1ojCiZYwZCGZEDhCCLd9wIMpOZSVn56I2MhMgDHnmTZZZSlau0kSIr8r4GeLMBFXnAAyQgzo+c
so5nTKW9ekkjTmrkm96kyCMhWU6O6JCQE/655z1BQzYYMRJtDdCAQOM5EWHSkyOn3KVEEspMPWYz
RXZzJUY00IEOaICgEsGAJyEJAYQm9JoNsaa7SIeif5auohd1QEU0KsuDaKCOH52IEdMJUjaG8Zd7
k6hHBOqAFFikBAeB50tlqtCJaJEhB7BdsDy0TVb5kiA3uEFFkmoQeIIzn/ocCVA5088MmfSpZHBA
QFVqA44EdKBXjQhDa2qRBnQAnFu16UMlJLgrBlWsDVApVTNCUYsGlKinZCtFrOqupULoqxZxQAY0
oNKJnHWgjd0ISvNqgrg+JKYc4QAH4DlSZzaoriJzgGhHOxGBovUgARCAaimSUoGUoAR7bf5IYD1S
0bdi1GCGPRA0QbhYDWRAtKwVaAcYYJABGFcAARiARAhbk9rGM7ah6eqATLpT0wI3uA6QakFUy10B
SAStt5VJReFq2c6G7U/u/IhpGesAFPjUIjco60BiEIPuRuSx3ozsRs5aENg2xKrlLQ07EQVakgj0
twOJr0ViS9/6CgAAEpnsUM2aX/IGOCFWTStqpPuoskUTIvLNCH2RS9+IUPSiZKjsfsFrggiPN7wb
vml6dmvXgfC3INC1iABiMF8eV8S/EzUtjBtS24tqmCE1yLEUc3upPrLkm9ftiGoHwN35wqSvRqbI
ix1CgxrUgJ8knTGNXXLWby5kAPWNSP53qUyQGCg5IgyIc5y/O9C2IiS1qxWIj82brPJEs8YJWe+Q
B2JcKnv3IQ2uckfkPOeIjDbKZACyjpEbgACU+DRhBg9oxSbODEwTIhrgAGTdq12CGHrKh25IopG7
6IoyGiKPFu1rX5uR7uY5NYjUzp8rJ85em7jOA7FBiMmwYwcPIAAQGfGOF60CFcj5BNCONgjeTIb1
MlbKMLAvawZ8nU2/cp6enmVGGKxsizQYIbd2SLOdTVxYr1e/GoGBg5FNkBqEgNrr9OyvXrc7R87z
ARCY9YUpMmLlXroiexbIlA0NEXaXlqfw1ohq6S2QLq8m180BpknALe6B4DsiaE51wv4n4mZCF5rN
DpFzA9rt6Ig/BAYieDOeVxsDGrwm08oZM0se2XGPUPnYIt+IAGSA6ocwutEcSbdAYMD0hXTX0rLB
uHCa6lSYTDMDIVmzyD/uEPoS3bgpb/ZwGdCAE3AEz6kdCAwaYmtWT9VeTD6WhwGNkF7XU8rKPvZH
Ck6GGgw7IWJvNLRNYIJpV+TpAWD62tmu7FSj2/ED8fKX5Yo33+yaJvOUZc8V4tYJL6TxIEmu46O6
kMAfGSO2pvjL552QSk+8xzbnM8Fws2uwLgTc9CQBCWaNEOZ+vr7HPrhCGM6Qn/8cqoZPyY65q/qH
vD4hiBe+gPVNG07a3iEcN0iOM/5M8DMfV7lOXzjkW8J01ULYIDDnukJSv20ZY1rjNzwjBbDP880j
5MRZ7j5CDF1ohsggBl83fhnhVqcXfujXdBghb8znGtx2cdFzfYG1Qgukfg/hVn7leRJRcgYxdAvH
EIkGdh3hewJhA/aWY2jnXYqXdDGQbc1HEBTYTJUXY07WEqMkWBYxWQ4wcBaBZsAHfp9HdN7ld5m1
Wd+EAlFVahv4dIvnEamVdvXmZf4TY2/zfg8YE2bUUBR2VZKmETLwdUIoEaSHERZoWwWYhNp2ETn2
dN5Vc7HXPNczJ9fXOZc3E7YkQDaYWGIFaR1xfEgYETeQfBXhXGW4gaB3EUtIEP6pN3IMuCj3Eod0
ATsfdhFHpE4hKGR6qBGFtlp9mBEQ8EREZlurZ34VkYIHsXyKxhANQISkUSee4ohwUXs5oU87VF2Q
9REnd1xksIkWAUAQEAHr8xFK13rPR4oJIW+sh4q+91oveD+a4opt4W07YU0gAIgacWJ5pYMH8WrQ
B4Qg2BFdNEILIYICUYKTNnGJ93Is6BCaBU+VhY0xJC00kxmI5RNXeIcF0UINUWe01hBHx3IHUXA+
yBGxBI6cR1gpcIS19nQiIYiDCEbxOChAVIUzIQIhhUz2KBCENIsQsYUJ0Y/r54V/lxFyhEHrs0BR
aBCT5U0ogG0LeBDLmBC1pf6KXLUqwkIZBSYTvuhAD5FFFykQSLRPH9FsCyBnIPYQFXABDRFJv7gQ
DOkRO5ZtD4Z+FKkRWzY+DrErEZReOEk/87OU5oRZHrFucdaQBqGLBwEB6oOWklWVThmMCPhOnJVJ
i+OMinOTNQFA6vNFuQSWYTl2YNgQeNlRChEBDkRMCtEBm4URNqBkaLd0b7lfADZrJPCSf3Eyb8IY
0HgTXZSXIsGXi6aN3hhJaqSXAzE/pumVZlVRAhGGZjhxh9gRTQkREiBAgEE0dBc0WpkTI8mZIYFD
GukRY0mU3jiQqFkQeLlGHmFVZqlwComGMFlRMukQGdmTz2ibdFk1c+gTJP4ZAVMJEh9FnRDRASow
dv64EbGEnAixmVBkklloZglBX1DZguHoefuIEGzpEN9JMkpzm1yxadcJEfRTP/MXEmsFEmKJdB1x
AeiJELu5oO8Um+imbOfnEJH5X2RpEDNFU3UBQlTHO7kZFHiZRx5RoO4mUAwReCJxkgqxnR8xhoO2
XQJYkHEZEss0ASAgF/v5n1SRnUXhROojoh71k7AWawwxXI4VnQhxlIbJEoIYbJQZaILmcsp0VJBz
NPy5FZl5FErKm5c1oJcFntUGcVJKEGa3XOJIEBCQpvYDExq2nKyVkiPhm2DaFRx6pW1jl0txQQFE
mi4JAr5JieplXWM6EP5lGhEvNmiE+UQOuhGJWpwFQYBkcJAfgYMe95VCCjVWqqNSAYtQEUBqFYEi
UQLvNqg3eKjpKZoE2RFpqqaCGVQz6hEOkFIvxXu5NIlYOBZDZKdYkaVjMVOX2hH7aF0hMZ6gmBDE
6UdqVAGtWlVnqhGx5o6SaKsT4ahMkaOaChU8ahb1+BGxlVd49RFSdZ8GIUdcmqCiqay9B6EQUaj3
N6oiYZHTCKC25ItPkaOFwalrYZEjwX0cwZpuBROwlKooKa4Pwa4u9W75hI8MUVQ7mUVrqhR1eq31
OncSG4tIBKi0mH/jNmyvyhKiyacC0aQSwQAdwBCCKhHTKRLH6aVHYf6vMoOnbXEAIBCBGMsR+Pei
j2ehHbsRnag+DHFvInF0C8FTgAWUH+GjnmoUuVqx1cqrb+GrDAus1eZXpEoQrud2h4mY7tkRytqL
9KoQRxkSHmmpsxUSagSkNpOpTLsUkLi29DiJPQlPHLAQ9Ymzpch88kkQ6oqGJilCXpQQXQlF1HoR
DDCewjmiJAoSD0QULos8TksX+lqBO+uCqNecCHEDxJpfHzGSAmuceAmyFrFufumdZQsSAepDZ9O4
gYE6CqOrT0FKEOFWRGi3FpFtDoa1BWEDpAepIMG5izoQ3/i7GWF6vfmrR6uoLKsTrMtNkWg5H+S2
VHEAAmcCtVWsHf6Rgk+JXBPqcZN3ESXrEEoJur4LupV6X4drTrJothiUQTtRpw5jJxcDvV0hshzx
msSWtwM4uRUhmr3oEG5qEIy2cqTrmRxxlBjQuTRhnfJbr/A4hZuhtRshAsQoEFfrhCHYrAWRqIBJ
vmVpdEI7wIUUEbOZvAlxlElrE9Y5PXziwJyBwcUEfXibnNC5tS4YhV35sBwhXwNAdIdJrAiqENL7
qVHLEOnLEN2ZwO5LQMziMaHBryDBfhlxhChAsqaKEAsUmBw8EeIXkAUhnoZbngoRrBiIEEPMELY6
py6xtAtcFYxoMmssFibAAXt7Z8G4ELbbkhURArrbxQRrnKgqvP4XcYsxKhDN9sMMUQKiRcMbUUvb
6hNo47pqIy5W9BnS+1otRgZzbBCu53oMQYrxub0SQW0QzBCghMALpnBAKABcDJn6O1U32sjtq7bY
BD+pQb/rZ7kIYb+4e8uDnK7fuxC7mcUQQXofuMrVKGQXOkmw2zSqu2QI1LyJkczMiccFMcESgVyU
JrmKnBDLimMXIVUFB8obcbNVO0gZmROP/MZ0Cj2Cos530WCNJ85k8KQweobI2MoPAQKsGRE6jHIc
sVXkDBLpFMJILMsO1YruDBdeRgNtSAbHCIxQWccGMcWZTBEKJhD+HH7f5xG0FlB/JdBmhMYfkc7Z
IyoJvRbG1P69BQEAePYR5VeIBRECfoeQmNzHF2EDW1x8Jxej9OxasVbOClRLt3SrKGOt06cuJy0X
lbbU+BsRireE5ReV3nwQtrwRgswQHKjKxqxnFiGmQP0QxkQGdUgBIq0wO5PUWNMqaP0WUGyIj9fL
vSfN18xd3fieAKjVCqGID+GuDnF19kfGZN0SauyGm0MbbT0R/GO/CsfUM/F/ReeBwCfPbbZnQ+cQ
fK19lrW+vsbMZx0bag0biXa7ks2cFNF2TX2DQEzTAtGFxjXaBVHXn0dsuJiPRBvGukcCuPfXMkHS
s4EskKwXDJ1w1FwQFQzXd9tdrj1YKwfGB3HRZNB/IHHVDf7x1QKhUY/UUj2ToycUdVdpGimt0hBx
2J3MdDBNEQdgAtFmdmPLEDZgfKo8bhuYyluNEdbNUUjc2bvh270hABF92o65hPwtihxxAiQLmjqd
iRohAgm3avONEf+220qjU7SnLrvRYPFpx4otEoFnyDCs1Q2egQNRbKrs3+E0TzDB28Hh22sNFzTA
YyIu1donwSvhxcMl1/8nA7MtED1tZRj9fPBNEHZ3d0Vt0MXx2bTR0MQm0RghVig2Ea7G3ArB2qss
fRnIYzP3z5LJcbotEijuLKfy234hecTN2B0xWt46sh/8EBldEHoNcpn44RWR2ydRRWDOVRTuGkom
3nyFVv6X6ILpDW3rrRGUnWbhvWYuGJKxOsa3l3lbjt+tGx0qXht6fhGiirCG+sVQbm4e/t6IlncG
obvaRaQQ8eBc3uXSYeSykb27/GO0Zm3UTcgbDox0bdyT/dAGkQIo4K2kJU0jkc4rnpVI/RrnxnzJ
rUQFIawTUchk9+Mh7unJ5mALkei1mDnLu0i/XkLdzRpITgZ5+9EV4cILweEIt2cMHhKXLdhMA82W
l+2nIdPgLaO0G9fgDhE7ztV6BnwkHly1je6OLh6tst2g8ZJO/Gt8vhH1qX+yzREHEJL7vhLV7lTX
TnlveBsWiM8IYQJYFu8bCVTSXuWznsP/exISPlfogf7qs1G925wQtAqnsCrqECHd5QtfPiVajCXX
0ELk7RHpsyGqNu2SQQUSia7rc/3xwaYRKPDTJLG0j8Lur0FrfpUTrv7qDu3sUCVV3r5clij1ffZB
96HWEV8WB0ACZDDwNGHpapZoeYtXNk8QUT/SRp0fy/L1ZkH2lqSwYN3qEFfawIcQSP9wDW/WXO8f
Xv8aLqrxsplVEvFaTC5WIBGlFfH3ufPoARL3r1HRFSGnvxm7icz4Ch+m037i6S733cP0qtFXhn9Z
+Yn1ltgRZXXuofO8CRL3os8V+7j2qF+69+X4HSFVn/8y/a4gJl8aQUwSoMpaonZtPg9fGfP2cvLl
s/5vFnZkEStktA83iNC6EEfvW4pe6r8fIQD/kLBBSDlUs/j5k2WtEFeHh4+mL8xvITrvGokrxLi/
EeKkeXH+SLseEqaOIbby/F8BtQAhgcxAggUNHpyQMKHAgw0dPsyQ4cKFBw8eXsygQWMGBw4ufvyY
QCRIkgNFJiiZUuVKli1dvoQZU+ZMmjXJjCSJ0+ZOnj19vqQQdOFLhRMY7syAAUNEii41auDocafO
mVR/XsWaVetWrlpR5uwaVuxYh0KNwlT4UylTiy2fdrR5sqZIBGTt3sWbV+9Kqw777gUcmKSEhRME
G1S6tO1LqVX/vnx8WPJkypXBXracWW9RCUcnW/5ouvcrTbmaTZ9GLXh0yNSttxYdylNCUApkQBxo
+eBChsV3I7P87Vr4cOIyV18MXlw5SdppZXeGDqLlBQsWKvYOW9rxcu7dvWMGefz7+IbNPdekTeFs
y4jtsW9NrjI+efr1Nc8Xb5+8+gm4eaan4LyUEpPovau0M24+/RZkMLD8GnqwQQldoqAC2gQsicDQ
sEIwwQk/BFGy+BQMscSBLsQwQ8WyIjG8Fk2EMca5SopQRuIqiImw6Pw7rMOYXrQxSCH5qrGgIofU
LIIKK3SJs85EPFI+IJGkskq/aIzSSsFoiyCCJs1aT7Qp/cpSSzPPNAg/NDOroM02KYhABDl5BP4p
vdjw8hGmPNfks08jafRTsgqqe9PLlszLC4EysQy0UUcJynLRR7GayAILYVIvxa4kDWnMST8tcURO
Qd3JUiaHo4s0T0ll9cMyR201pi5nrS21PVtaNVZdG1RzV63eDMpQ03KFlFhfj7UvUliRrdNNCyMI
IVo6VTPWJGav1bJXbGsCrVDLqr0J3G3H5U5ZcmUa9FnKUp1r2XPfJS9SeGMKEEp3D7p1Xn0nNHdf
5cQV11+BW3t1YNfAzddghZOVd+HMEL7XYYmF63diwBKWMmKLN0ZNW47Jqhbjj0furmKSWQxZ45NX
zqwuQFnuSWT5YKaZ4Zdr9jCugHHmOS+Te/5OSWYsVQa66L0Uvdlo1uJyWWmnl/v56XCJZldqq4nz
WGmhcyL6aq99SxpoiLv+umyQGeV5607JNrvtsbImOQGk43K77uWa7vRkgOe2u2+KC/6Y7J39JnzT
sBdWG7nBC2ccPrQNTlzxxifHumF/x6Y8c6xL4vvcqhNkW3PRN7Uc28gfWnx01R0Hz9fTUQ99ddm5
ippVtlOfPXcOg4719YYUjV134VnkHVTMh0f+4NrR/Dzn5J8/uPg1fccXd+iv/wlwMwEOHnvvOSwd
Se6/J5/iw2Ucv3z1CX4cRurTtH59+XmCW8Lmf5R7fv1dwxs5ENPfXwBt1T6btat7AkSgT/60Fy+A
JdCB7DvfvwQXvwdWsF0ERFXnjKNBC3bwYdJT3gQ9OMIBYvBhEzwgCVU4lQV+q2vvW2EMswNCe01F
hjcsIdegxMIU4tCHF2wdnhDGwR8WsTLhexsAjbjE+0SJghDiIROleJoWokxwU8QiFWmoQO71MItf
dF7euBhFMJbxPlvEH9mIaEY2igiNuEJhG+XYRM65K386m2Meh/VGxYlQj3/8YASrF0dAFtKFJvyT
TYBnSEae8Xz305MXGznJH0kPhkaSJCU1CRllEXKTnzyiIOEISlIGcmlpLGUqD+k/TvZPla90I+og
A0tamhJfwHliLXWJyysNbZe/DOVBXP4JoUwC05jAuaXkjrnMydzRWsQsJjOlObNnYnKa11xXNReJ
TW7a65LdBGfMwjlOcpbTnOdEZzrVuU52ttOd74RnPOU5T3rW0573xGc+9blPfvbTn/8EaEAFOlCC
FtSgB0VoQhW6UIY21KEPhWhEJTpRilbUohfFaEY1ulGOdtSjHwVpSEU6UpKW1KQnRWlKVbpSlrbU
pS+FaUxlOlOa1tSmN8VpTnW6U5721Kc/BWpQhTpUohbVqEdFalKVulSmNtWpT4VqVKU6VapW1apX
xWpWtbpVrnbVq18Fa1jFOlayltWsZ0VrWtW6Vra21a1vhWtc5TpXutbVrnfFa171uiZXvvbVr38F
bGAFO1jCFtawh0VsYhW7WMY21rGPhWxkJTtZypoxIAAh+QQACgAAACwAAAAAgALgAYfGcBnamRbW
shzEvimjwkuUmWp/f4N+fot/foB+f355j3hqtXBYvHU6u4YdrpgSqaINm6sCd7IBYLoAYckAg9gA
ptcAvdoCzuMG4OwY5eAz6uVC6vJJ6utZ7t5q4N55z+5+xPx/0/1/5/6B9fyH/PaT/umd/t+o/tOw
/sqn/rmg/qu05qHmsIjynXv2tnL30nf85XT683Xp9W/Y/HLe/obi/pbb/qHT/qvl/tj+/v7+/v7+
/v7+/v7+/v7+/v7+/v7+/v7+/v7+/v7+/v7+/v7+/v7+/v7+/v7+/v7+/v7//v7+/v7+/v7+/v7+
/v7+/v7+/v7+/v7////+/v7+/v7+/v7+/v7+/v7+/v7+/v7+/v7////+/v7+/v7+/v7+/v7+/v7+
/v7+/v7+/v7////+/v7+/v7+/v7+/v7+/v7+/v7+/v7+/v7////+/v7+/v7+/v7+/v7+/v7+/v7+
/v7+/v7////+/v7+/v7+/v7+/v7+/v7+/v7+/v7+/v7////+/v7+/v7+/v7+/v7+/v7+/v7+/v7+
/v7////+/v7+/v7+/v7+/v7+/v7+/v7+/v7+/v7////+/v7+/v7+/v7+/v7+/v7+/v7+/v7+/v7/
///+/v7+/v7+/v7+/v7+/v7+/v7+/v7+/v7////+/v7+/v7+/v7+/v7+/v7+/v7+/v7+/v7////+
/v7+/v7+/v7+/v7+/v7+/v7+/v7+/v7+/v7////+/v7+/v7+/v7+/v7+/v7+/v7+/v7+/v7////+
/v7+/v7+/v7+/v7+/v7+/v7+/v7+/v7////+/v7+/v7+/v7+/v7+/v7+/v7+/v7+/v7+/v7////+
/v7+/v7+/v7+/v7+/v7+/v7+/v7+/v7+/v7////+/v7+/v7+/v7+/v7+/v7+/v7+/v7+/v7////+
/v7+/v7+/v7+/v7+/v7+/v7+/v7+/v7+/v7+/v7////+/v7+/v7+/v7+/v7+/v7+/v7+/v7+/v7+
/v7+/v7////+/v7+/v7+/v7///8I/gDJCBxIsKDBgwgTKlzIsKHDhxAjSpxIsaLFixgzatzIsaPH
jyBDihxJsqTJkyhTqlzJsqXLlzBjypxJs6bNmzhz6tzJs6fPn0CDCh1KtKjRo0iTKl3KtKnTp1Cj
Sp1KtarVq1izat3KtavXr2DDih1LtqzZs2jTql3Ltq3bt3Djyp1Lt67du3jz6t3Lt6/fv4ADCx5M
uLDhw4gTK17MuLHjx5AjS55MubLly5gza97MubPnz6BDix5NurTp06hTq17NurXr17Bjy55Nu7bt
27hz697Nu7fv38CDCx9OvLjx48iTK1/OvLnz59CjS59Ovbr169iza9/Ovbv37+DD/osfT768+fPo
06tfz769+/fw48ufT7++/fv48+vfz7+///8ABijggAQWaOCBCCao4IIMNujggxBGKOGEFFZo4YUY
Zqjhhhx26OGHIIYo4ogklmjiiSimqOKKLLbo4oswxijjjDTWaOONOOao44489ujjj0AGKeSQRBZp
5JFIJqnkkkw26eSTUEYp5ZRUVmnllVhmqeWWXHbp5ZdghinmiwmMqWECaJZp5oRpqlkmmms+CGdB
apIxZ5wI3kknQXriCSCaCNR5kKAC9emnfoYiROhAix5aXwIIQNRooZM6yl6bElVKqaXvJfqQpoyC
yml3mF4kKqOjkucpRaeimup3/qtOlGakn7b66nKlaqSnrZveOl2sshoK7KC8+vrbsJICi+yexiKX
a0bL9lprs8QF2lGarGZKK7W8YbtRoMUSG1G03Krm7UbkNpRuuOWOli5D53pU7LvtdhYvRuCWtC67
9Vp2r6nWprTttP2K9q+p/OoabsIFK0avQgevtG/DmD2LUcQvTUyxZA9DzLBJ8368MV4dK1pySguP
nJjFCIssccgqE3ayQRj/pHHMfOXL0cw1Lewyzl8Bei3PN737M9BaER3q0TrdjPRakDJt58BWOf00
WTVnmvVUPl8t1tbjSl0UvWJ7DZTSoZpltNlZgV0r2k5ZzXbccMPNdaZz0y21/ttlyZ33UHXbnTTM
fwcF7t5le9V14TzZzXdcazOOk+OJ90245DE9Dq/md70bMOYvI+4Yu5WDPujn35b+ltGqmx644Hax
brq8gW8W+ewtD936XovjHrbYsA/mt+8m6767YMMTzzLCraVMPJ/AB/9Y8oVzvpD1Bl8u+eu6Of83
9glJb3vvV4Mf/vEMVVBBY7IDbT6x4j8UQQQUzD+69xtTHtMBIoQgkPoUqB8Fpqe1hr2PZvGLSAgW
WAELADACkGkftQ6IwJ1Y4AIAnMztXqUzdFGQJA2sQP0qszCqHUp/KZHABFY4kflFQAIQJCH51tRB
jdTwJCucgAQkMBH1idB+/v7CX5g+CD2XBDCHPGQI/0TAxBCqL4aXmeGWiEipBCoEBAGkwAqTCJEL
XMCBI8yMBLOEQpgcAItH5CJEKvDFCkBRMxukEhXtBLcHWAADD8BARbY4QIqE0TNSdFIZO+JFC1jg
ARTZoQ53eJsxKml5FpkjQS6AAQxkAAOHnEgWA6jGjIBgAn2MohCNRLnWUbKSmPTjJjt5kR26cgJi
LGCR5njDkaDyAoiUCBZFqEVWWiSHW4RjsIQ0SJRkIAMQmMgB/JdFX1oki8GEI+l8NEfwZUADGrDI
AzKAS5tsUof2GuaNIFkR8zngnOikiBcl8IB2eoSFFUnjZ8iGvgaVMiPH/sxAOieSz2PmUiOKZGQi
VahC0JANRpJEGzaxeU6K9LObGwGmQCMCTHCGhnT1JJDdaomRhWqgofzM5wPeiJGKOnMhoJRn9mSF
ooSWDpsZaMBFuGmQBmBzjxKdSEp7WRpHfqhuHA1JCixSgpo24KgypQgS48nThRzAduLkEDlZldFr
kuEGN6jIUwuCTaQmNSKudOVIisqZg2bIpRklAzrPaQOOdKADGjiqA3Sa0440oAMCISsgAymnslnR
IPlM51Yz8ta4NsAEdF0qR7yKWINF1UForYgD9DlXinhUnwcRgAwqAtcGzNUEenWISRfr1a9edJr2
9OvH1gpSiXj0owUZ/oAAZDtbiZQ2ryUYbEMUu5G3doABRzUNRhNUTQr2E7OW1UBMUVAQATh3tgKw
7W1pooIOVDe4uj0tSzVazI4q95gOOIFk55pVgsggBjJ4rmsXGlyaNEAFKgBuAkoQWnfxFT+R/QhM
HZBMFAzVIjdoq0BiQGDnBkAihY1rZRebTYPktiFepa+5HnsfSdKRJMdUY4AtotsCCyAGrn3rURu7
Ea82mL71TUhpTYsas9pHcBaGiIAzItsBgzgi7QWtRlZsAhI75K4dQKprfNqe4v5VINfMwEGyS5HZ
1tjGRGXyervKYof4NshVXkgNpOwvCqunuyZh7UIGkN6IDODMZ47u/kBujBEGLGAiGoCrYScCZCw7
hAY1qIFBUYueqQYrrQPpZ2szm+YBQESz6a0tQWLA5Ycw4NGPRnBnF4zg9jZXzWvu6X25Y+EjI+Sy
4UUIbdMMEQLHALodgTSkJeIAuTZ4IA+uSAACIIAAAADKp+EzrFQrtXZmYJsQccBCMevf8g7kw4ke
wIEfUuAzpxq+qw62mFGcYok8d9YBYHOLN/0rGCfOi+38p0P2WxAbzHgAHsb0QxStbYzAN76PPoG8
530CEHD5tQ6odkWea+Ahe7nbH4kxGY7rTo0MttnZtoipDfJcQz8E2gxQQEQ86tmOCAAG1zZIDULQ
aHvpOjpGbh3B/klAAmpvxNm4roi20Sxbhzsk2hNnKKUzwm9bEwTPqyGycsAskn6KWyAdX/eoM63w
rfLbuY5WNZwHHREYiIDLtcZ0DGjwmo87i3sr8WdInEtqomOEwMl+uaoZgBIYmD0h2J51dNvdPG53
y6Uv2aaSP/LhU8922QMOekNMPVsA6JkhDIA4A+a9EfUWBAYMOXrCORxOWQbH24AuSLgL3hF0213d
HDE8GWow44TA97dkF4i8e2zvJht42WZHfOJrXpE8/93j2+1NpyN/kHzi8ucqjuurFcL3xTOEzJhH
SMNdflVjHyTwkbZ4zVXvkA9jvNYK0byNqW5fxzcS8jQh+ANI/l5yCRtVyA1x7q3JQOCFOFnR0Ucz
+gVyg9KX/fJ4X3e/0Z528pe/xbGnTSlpvxCfL9kgVGZpEcF2BMF1TxZ9lxd8K0Fgz5cQTqd3wldz
8ZcaOmcuPCcSEpBFDiFSycQQQGZYWeYQBEgGyMZ1E2gQYOdkH2FTIYgQdneCqXcRigcbw9V2tANo
YVVQCwSBD+FbNqVvIihlHkZ8Lthsm2dXXmUQNrBx2cVvAxGDGmF284cQPFgxVkcacNcS3yQB/vMR
nZVXHgF2KDdm6Md5OxaAKJCGWGV8BJFmtYZuzFd4U0gQrteFuWYrAmcY+WVEqwQSngV+sXZyA3Br
ZigRWNVR/oUlgNHHehmRXWqHdANGA9TXPNczJ/xXF35GVTNBAbxEASd1ESv2ES1XW2wIEe0nZXfU
EInYggWRbic4EXEoEDW3cLIhLH1yiXIBO3moSp4YEhQ3cxphgM5WihYBARDgQB2oEInIbM02fhQB
hQU4gxD2VsKVNoOyV7yWEzkIEnHWVcC4EIH3ZgmhWXanbOy3EYbkQBWQjBzxgg1Ba+oGjQcBA5f3
Y0lIEPRVhdMTK7jIFti3E0e0SCDgfhrRjUflfQ0xdryHXuu3Eaf0ReyIECy4ewPBhLJGa7NGBmeX
eO4IYaXVYwhZVm5SKf2IFnsIkNBkUQ8BTx5YWSGpEGMX/noHcV4yMIYccUsWAAF2eBBetWApsIYY
IY3NB33TKGKKKJI0oyhBFD0lKRAi0BDQ9IkGEVBSeRCBmBCBpwILAHOiJhCF6JCVhEEQtEA7KRA2
RWUOkIZy+HxE+X8X4YOsKEMkuShNGRbeRhPr85RQqVKitUUT1RHv9mgS9xCdpxDH+EUMkZMe+Ith
WI/zqJdvaZSwpy6CUpddcZIxEQFPNBKj9RGBKZMOQYwG4UPruD4ZoQEc0FV015EEsZEZMV1WuDiW
2TZ3aRM+VD8k1RGd+RFKFxGiOUmF5EAKEQGGZJoLwVAZYQNMBo+t6Zo7dlvURgL6CBgn8yaM8Y83
UZyb/hkSdcWbCtkROGmco2mMEBABERkSh8hwd5dtzllicHlYFBVKfkE0ngYWmHkThbSdIEGVsPQR
C7AAoAeaGvGQiokQ6YiMfmhYKPCb/GaOGMFl7wkRiqRD/akXH1Sflzl7P3FHGNSL3IlEVUkRnymg
GlFJBYoQlNRGOkmWJYZUrbaQGXcRLzkQcElR3Rk7SoOhXAF5s5k+YMSZN8oRnxmXFlGWBnFKDpSb
pxmAC3lqg4hjcYVbHkikBrGFOPozmWih90QUmwREILGbDyFsTGcQ/0miP3ZTC2GkR/pFSnqacnaU
BVhgr6gQHykSWziQuXg0OroVGnoUpOlGQKqSYSpm/gohXnR2jwdxjA6kRy0RZ5M2EMp5hiBIpc/U
VJCjpz0KFdh5FBekjm2qEKAEEYL6EB41pgVhqDgGmwVBmsb4Et44EL8JZ6v4jRvBn6tDn3tKm6rV
FGzUoZ9aEGdEBio0qvq1UKZKEKgKEd04ZweRom0kEhWAARfAEA32kx6RYKY1nbsVpCaJqXq4qUwR
Qr9qEJ8EoiFBX6gpcyu4iggRniEBAeoDrwnRakfFXPr1qGSAYh6RkiGaod5aGOA6Fvz6EQjJUJQq
ESiQiLRKBiZ6oh3RQOp4nmapqhzBWjO6EXcqERQgnFGRo7l6FX2aFgPbEbrVkwf7EMZGpJgksQMq
/q0qehAUd7LIepwftU8hIU94Kj/046VM4bEAG7BnMbK+yKQbkZ5kcJYvcUfSyrEA+KYyOxDJahDC
ZqwLG1H9WhCcyEvjGhQX+rFVk41wwZe+6LQG13ku+rTgKa2ACrNvWrWFSrPIKRETWqEf4UQipBQ+
KzO1+RZnBKJXOxEmkK4KBhHwqIAEcZaI+rDSmpjiyZODOxHIpxBUS1diFRJspI7yCTh5izxA6xYp
FU0QwQEOQVZUdmjXNqcCEbNuSxGl2aoKoaYc8Z3zqlRg6hHF+UdC4bGZ2rOJ47VIYaUPQbEFcbGm
64TK2FloS4VkqajFybJkAK8YBBIx+aW1+7Au/rS1RfOvnAu2eLFTxEqnwgt0GUGPbJkQN4ACBrm6
E6G0L4sQPuS6zwZvZqoR3MoRWftDZ7O5gYE6CuO7TQFK36tiRgmn44txHvaKNmC0trS0jUsQF/RF
TBu7ghcSwxrAGgGxPoS9MMG/5bSLY6G7j3EA1NZjJhChHAGNFweJBHEAr2cRSMsQYbm2zRqWEZwQ
2gpxybtb2wgSvfqjTYOrDmMnF7O7YVGjJ2wQhWu4oJi4FhGtS+u8BRGrx8eVHVHBoPsRnSrDNoGr
RCwVI/lnndEBHEDAESEC8nhsp7eC4buq07oQKdrACiHFBDG91OuXYAXADlHDNAHEo8Mnb/MZ/qHI
eOMolJJausBqh/Cak3B8EYUJkwGafE4FhAhRvwqRg1UJmXvctZFBKKLiv3DxaEwcfdYmheKHEWuY
hgnbtghBlqz6EXlWuJ43waMryQdxxQ6RknTbE0TkwauTlPATGiT8ecBFpfBIaw6RegdcpAnctMya
EA/cvKKofkQ4EFkJbxAhYS/cEQO5SVpkM0zjyR8sLlX0GSJMXySmAh4QX2QcjbWGugIhj9K3iAYR
dBW3EOyrx4JMgsOnENYsXXJFsiBABtz8ty0BwlF0Pl0MF9dFpUfXlgYRixHxiO5cU2i6EDEMxYZY
XjTJdSsYgOqrSZy0E7uc0EEDP+B8GKfG/pYC4IxP2J7Wdm1KXBCBrBAQ6ZYVkVV8p8Ic8Vr17BFU
OTnfTNL2CT2ViRu0SI9zKL40x4hTGsoRAQIKLGM21pAYoVfY+qUBSdAkMdJCbZfSQiddPRd5Jonq
OdEK54oLkYYMELMasWES8crxnBESxl4frbHACxNoc9JtsTVh7RbL1MIFoXYZecJnR492x9JkEAKc
B5QCga113RACFgAt1xDqR9VkoK34WALnRFkeEQJoBE14bdDu4hB6LRina9YMkXqxGNeNZpA5nBA1
wHKWfWlcZ7gjOKhrxRHLJBBR6RJ53dfdStq20dCILREQPRDFjGNbJ4wMsdGzTX6SVap1/v0AF5AB
FvAQWu1BmArcUEOZtFFgbFncDsE/xy2LpysTzj3NKIhwC5lc6jrP9ZWO4fbDO8PdbtEq9s0WtJjC
Dh3YxhsRhGwSB8DYsthsMb1mTrp3AwF8DVGqClEC3EcCBAfU9a1/p1LadCGJbJfUtD3YEGHYMbpY
DPBbDOHWZHBez30RMSDb6g2AsPUQqMRNuJcxHmtCtSjcpfHXgF28Ib4QMVh3pUwRB2AC9CYQdLwQ
kT3ZD3oQo2aTHHFJlgRRmRPUb6cuvsHfQe6A7RnXFyFvMTm/BRHblZ0RItBuiMbRIFFJvzblRxNU
uHHhu2FqSN3fh1feImFd8it/Ttbi/hOhbeflpHyOERCQTzRe4cKBLBj+FzSgbRwOdGbMElkJeg+x
0WOI2a1oXk6K2kpkEJNHeSjB1ceB37UxiQIh2JoeEef0URTpEBB3aAa+aLctgmx2gHKNYiRne56u
L1S+cxee32vheurZzqeO2z0NEbLbEDKQXuod6yJIgqMIEhOu67veHHDuGlB3dOJtEb+4sAdAb/JG
BkeeEcxO2bI9EAfQyEi26v3nfyPx276+GIj+7m+R0s+V7ROBrnQdESfw5e1IYLDM4w2ZwMa22cea
ECIlElSU6I0HL99Ngs837Amhr6lrrBIxotFcaKU2hAiRAszFWo9NBjPuQfUt75vc/uuvQYv6DPFU
CLPNDBGfueS0jWauzpDuPLWBlTkcHEkkT0I4vhqkvhBHNcYuvMYL0c9f5+cMmeKZpezUul8fTzsj
Hx6ijhqKveMqRvRN79QSYemLNhB/jubFqlxPb+gKUx6tYuOgoa0zPXGr+NqZreIIrvQPce4sP/Y2
tN19ZvK34Vtj/LQ9Rga+FaUb4X3C1uc3RmYdscwx4ebWlx5TXxtXts7DW7DI6xGa3WoFz3vnR3xc
D6v/pVYVrevaDR/xThv09VZCP94p4fETwXK0ju4TkYaEivD6Gx+P/xrYrPUwgW9Pf+aoBqtyvIGU
lfnMI/IvRto7bxYHQAJHi/Uu/sGYEpHT6p0CwjZ3/DRsyBX1/Ysot+8aQKb7FTGsW+99k2v4dye1
sz9lnG38Ze8f+J38ZVFnkj8ROxwR5P/ipveKgUX8kvveQ4z3AEFG4ECCBQ0eRJhQ4UKGDR0+hBhR
4kSKFS0STJDAocaLHT1+BBmyookOJRs0EElmggSWLCmWONnAAcqQB8howKkhg4OLPD1mDAk05VCi
RY0eRTqUI8OlSZ0+hRqxBJkOJ1NOwJpVAsUGOGPS/GjjZs6dUQ1mbHoRrVm2bd2+dSuUaVq4de1W
LDH1aNaVWyfm9OoT5I2xGhwINiv3J927jR0/hoxxY2TKlckc0LtXa8UGJTVY/jVo0yLhw23Xfjxt
WfVq1kUVJ3zdWvZdCVkvYmU5oaKGDp8RD8xMEQWKDGxjWzw+W/ly5gkRTG4eHWrLlhX5urQI1mBw
ig4ylE2auqN46eXNz05eMP159hT5rrR+feiDCxnqVzyc/3fK9RL7twcwwLcYQ4hAAQ9UiAIFcYtv
s5QseCDCByr6rsL9UPvvIfIQ5LBDqDIkA0QPAVSQAgbdk0+kCu27YMKJMtDpuwvVMnAiEUfEMUe1
oNMRxwUnEA1F+FLKAAMMvmuRIhh1cgACkDasKKPneqSyyqBqHOhGK2fLrS/LjPzORSVlXAzLiLTc
Mk011eNxTfPe84uyIjOw/qAxMyGC0k099zyrTT6XKxG3OEOSQEGBQAgSogeKvAtN2O78M1I1IXVU
0rcCHVKk3FgCAYSJImyRvrgqPYhUS0/1ENIQUW3tx0FBuu7Vhy6gNVTjVG3IVFZ3PRBEXHllCytE
UypxQVkdAjPMD3XFiFlgn22PUmipLNbEYxsy8sgkkcqTImenBde8DL8NV7Vir8UWzAciOIrcEN0t
N17mpJWXsgo6UtClYV8UUyl34a03YNl8FbixCCiowFAhW/IUsn8BLjji1Sj9VWKRSozgYCFPtPNh
iz/ukWCQoaqgZJMjECFlERJdCFN0o+rWRohHpjkyems+qgILLCiZAnYn/nK5LgQqXmhmnI927Gak
h7LgAp4psMjYuoh+lOqlr2ZtXKuxTuhpqKWTEsOtuSa7MlXHLlugjNf+WrmYz0Q7bbkfE3nuiXpW
8OeB4xbobbv/Rm8jvq/WuecIQkA8BJaT/hdwx6NV+vGuLzB84sHfvVxyzU0TfPOuS9bb5gSmxNBz
08H283TLL/dbdddt7vx1szM3WnbbiTr7dsavzFx3312L/HeYWe9deOOViv14bsltXXnnR039+dLF
lr56s5O3Pkrmi8+++45IZ8p7uGkXv/zdczW/aNprT7/96Evl3vTmBY/fffsfGvp972kH/37/48Je
9+Y3l/79z4C30p/x/gY4lwM20C7BUyDx6udACiawWcdboEIyWEEO8geCqhsd+To4QqEFUH78myAJ
Vag+DblufSuEIVw++LcNFoh9McRh0UwotxraMIc/HNAMr/awFALRiBp0SP7IFjbqHdGJ0EPf0noI
vydWUYYWDNgUqWhFLgIwV0WsUu9u2EUywqaFEdNiQYYGxjK2sU9Y5BUR3ThH01CsXEycHh31aJwz
AiuNzWLjHgXJJjiuCV5jHGQitxi+Ux0ykIqEpGSi+CdHRtKSfPyinv6YJURe0pMXnGQYR3elAn7S
lEkpZalEKZJOntKVkmQgjuT4SlrCrI+9OmQtdZmYW0KOla3cZTB9/vVI1ygRNcYMZjI/1Eu3VVKZ
z+TlDlXjSGJC05oiqqa3JGhNbnoxlKITYTfFiclMOmx92RznOOv2wH8hM53vjCYjg/hCeNYTiizk
HO/suU9vytMpm8wSPwXaTx0u75wDRSgCy+mvX6IzoQnNnT5D4s6HVtSWhYzlk4BpUY6CkiEUxVMq
tddRkg6ImXOhZ0lVSk5/apCaK4VpHaUZ0IluNKY3pek3+zZKjeLUpwRF4k5T+lOiDo9+DS1qUvPZ
Uhop1alLDSqNHPpUpfZna3ikalZZ+kYbadWrJi2Qf2z6VbIm52xjJWta+3YQkXpUrW/d6qpcCle6
xgV8BAJoXfXq/p+ccnKvf/XiUtYIWMLWES1TLSxhEZtYxjbWsY+FbGQlO1nKVtayl8VsZjW7Wc52
1rOfBW1oRTta0pbWtKdFbWpVu1rWtta1r4VtbGU7W9rW1ra3xW1udbtb3vbWt78FbnCFO1ziFte4
x0VucpW7XOY217nPhW50pTtd6lbXutfFbna1u13udte73wVveMU7XvKW17znRW961bte9rbXve+F
b3zlO1/61te+98VvfvW7X/7217//BXCABTxgAhfYwAdGcIIVvGAGN9jBD4ZwhCU8YQpX2MIXxnCG
NbxhDnfYwx8GcYhFPGISl9jEJ0ZxilW8Yha32MUvhnGMZTxjDhrX2MY3xnGOdbxjgQYEACH5BAAK
AAAALAAAAACAAuABh8ZwGdqZFtayHMS+KaPCS5SZan9/g35+i39+gH5/fnmPeGq1cFi8dTq7hh2u
mBKpog2bqwJ3sgFgugBhyQCD2ACm1wC92gLO4wbg7Bjl4DPq5ULq8knq61nu3mrg3nnP7n7E/H/T
/X/n/oH1/If89pP+6Z3+36j+07D+yqf+uaD+q7TmoeawiPKde/a2cvfSd/zldPrzden1b9j8ct7+
huL+ltv+odP+q+X+2P7+/v7+/v7+/v7+/v7+/v7+/v7+/v7+/v7+/v7+/v7+/v7+/v7+/v7+/v7+
/v7+/v7+/v/+/v7+/v7+/v7+/v7+/v7+/v7+/v7+/v////7+/v7+/v7+/v7+/v7+/v7+/v7+/v7+
/v////7+/v7+/v7+/v7+/v7+/v7+/v7+/v7+/v////7+/v7+/v7+/v7+/v7+/v7+/v7+/v7+/v//
//7+/v7+/v7+/v7+/v7+/v7+/v7+/v7+/v////7+/v7+/v7+/v7+/v7+/v7+/v7+/v7+/v////7+
/v7+/v7+/v7+/v7+/v7+/v7+/v7+/v////7+/v7+/v7+/v7+/v7+/v7+/v7+/v7+/v////7+/v7+
/v7+/v7+/v7+/v7+/v7+/v7+/v////7+/v7+/v7+/v7+/v7+/v7+/v7+/v7+/v////7+/v7+/v7+
/v7+/v7+/v7+/v7+/v7+/v////7+/v7+/v7+/v7+/v7+/v7+/v7+/v7+/v7+/v////7+/v7+/v7+
/v7+/v7+/v7+/v7+/v7+/v////7+/v7+/v7+/v7+/v7+/v7+/v7+/v7+/v////7+/v7+/v7+/v7+
/v7+/v7+/v7+/v7+/v7+/v////7+/v7+/v7+/v7+/v7+/v7+/v7+/v7+/v7+/v////7+/v7+/v7+
/v7+/v7+/v7+/v7+/v7+/v////7+/v7+/v7+/v7+/v7+/v7+/v7+/v7+/v7+/v7+/v////7+/v7+
/v7+/v7+/v7+/v7+/v7+/v7+/v7+/v7+/v////7+/v7+/v7+/v///wj+AMkIHEiwoMGDCBMqXMiw
ocOHECNKnEixosWLGDNq3Mixo8ePIEOKHEmypMmTKFOqXMmypcuXMGPKnEmzps2bOHPq3Mmzp8+f
QIMKHUq0qNGjSJMqXcq0qdOnUKNKnUq1qtWrWLNq3cq1q9evYMOKHUu2rNmzaNOqXcu2rdu3cOPK
nUu3rt27ePPq3cu3r9+/gAMLHky4sOHDiBMrXsy4sePHkCNLnky5suXLmDNr3sy5s+fPoEOLHk26
tOnTqFOrXs26tevXsGPLnk27tu3buHPr3s27t+/fwIMLH068uPHjyJMrX868ufPn0KNLn069uvXr
2LNr3869u/fv4MP+ix9Pvrz58+jTq1/Pvr379/Djy59Pv779+/jz69/Pv7///wAGKOCABBZo4IEI
Jqjgggw26OCDEEYo4YQUVmjhhRhmqOGGHHbo4YcghijiiCSWaOKJKKao4oostujiizDGKOOMNNZo
44045qjjjjz26OOPQAYp5JBEFmnkkUgmqeSSTDbp5JNQRinllFRWaeWVWGap5ZZcdunll2CGKeaL
CYypYQJolmnmhGmqWSaaaz4IZ0FqkjFnnAjeSSdBeuIJIJoI1HmQoAL16ad+hiJE6ECLHlpfAghA
1GihkzrKXpsSVUqppe8l+pCmjILKaXeYXiQqo6OS5ylFp6Ka6nf+q06UZqSftvrqcqVqpKetm946
XayyGgrsoLz6+tuwkgKL7J7GIpdrRsv2WmuzxAXaUZqsZkortbxhu1GgxRIbUbTcqubtRuQ2lG64
5Y6WLkPnelTsu+12Fi9G4Ja0Lrv1WnavqdamtO20/Yr2r6n86hpuwgUrRq9CB6+0b8OYPYtRxC9N
TLFkD0PMsEnzfrwxXh0rWnJKC4+cmMUIiyxxyCoTdrJBGP+kccx85cvRzDUt7DLOXwF6Lc83vfsz
0FoRHerROt2M9FqQMm3nwFY5/TRZNWea9VQ+Xy3W1uNKXRS9YnsNlNKhmmW02VmBXSvaTlnNdtxw
w811pnPTLbX+22XJnfdQddudNMx/BwXu3mV71XXhPNnNd1xrM46T44n3TbjkMT0Or+Z3vRsw5i8j
7hi7lYM+6Offlv6W0aqbHrjgdrFuuryBbxb57C0P3fpei+MettiwD+a37ybrvrtgwxPPMsKtpUw8
n8AH/1jyhXO+kPUGXy7567o5/zf2CUlve+9Xgx/+8Q1V0JjsQJtPrPgQRUABBfKv7/3GlMd0gAgh
DDT//BGYntYa5j6awS8iIUhgBRa4QPpNj3zGKqABd0IBC1iggRy7X6p0hi4JOmQCE6iIBSvgwMks
jGqHyl9KJABCCVBEfv+rDPvwxEGN1PAkIGyhCyXSQPpRwF/+GgSTB6HnkgnMr4UN2Z8IliiCES4w
gJeB4JaGSKkDKgQE/0OiRC5wAQxmZoZZUqFGHoCBDEzkACAgwxElsMOIWOACF4SiZm5XJSraCW4W
eEAeH1ARFrIwhBShQBs5I0UnibEjGcgAF/NIkRyy8TZgVNLyLGJHglwAA5jEwAX4OJH/UWACg8RI
Gn9YsSAWiXK7yyQGLFARTwJyI38MpQwHeEq43ZAkmLSAHCECAiySUJAcySEoZUkZ0qFvQ4d8SCIx
kkgzRuQA/VMjMDniSmIWk3Q+sqP1HOCADHDTIg/IwAPGWZNq2itYOJpkRcznTW46gJMSSWQEFAlP
jfzRIln+tCYQ0TkjVGakmYl0AEUAKk6OsHGYfWzhK+2FTTIl8yIa0EBA6wkRglL0IsJ85EQyajB+
qshut2SmRDUg0Io086IWEaYWI2LEI4Iye7JCUSXF580TXIQEBmmAThtQEZU2MosLDU0kP1S3kIYk
BRYpQUF2utNGOrKVa1zIAWznUWRq85jd9OYNblCRqRIkohHVKUXYSNaUvlQhSiVkQzE0UysOxJ3u
tMFGOkBXDYh1oxwNSVo9M1QICY5ey7QIQQXqVYEMQAAU0UBddWoCvD6VIwzoAANM0NiO0lJO/pTI
ODfrzIlENKAlHYgABnDYitiVp2QwwV4/KMyOMOC1DWD+QGnI5qC/MqyZm0SpQzIA1gZAgCCkDS5i
JcJU1JagBIVtyGM18trmytY0xkzQVWdmUcEmsgEoIIgAtjvaARA3rHedSQdUoALJPje5Ql2rgNrK
EYBu0gQ2vQhXByKDGMhgtMOFiGLBWxMGkNe8ZDjuafqan7aW7aQDQQFSLXIDuQpEBvclLXEXi1qT
IJch5H1tgFcL3arep5J3HAk5C9JgiyRXwmSIgUQWS1mOMJUgx+VwQopbWXOplz62PeZBHHyRABzW
uylWcUVUm5HiNoCyNXZIcV9D4PVMF33hLOhB0DsR4QI5yEmlckR6G16INICuHWgqRGqgZX95WD0P
Lcn+Zt+pEPyW9iGH7e6VBSLkiyxgAROp62kpAuYuL4QGNagBaGibHnWyyq0FqW5Cgvtmhwjgvt01
SAzK3BDnali/iw1tRPpc4YXUGaZhKw+I0dZZZUo0kQ+A70G4u905M2QAMYhBpCFr6e82QNMDuXBF
ArBdgsQaNTcmVdmoOE5xlrohn5Wyguf7YPvOGs6R/jRGyKuCBbw2uw+B6zc3LGCLBODbAAAADH5t
48tqZ9Rl4+Jm4yllgtiAx7HurrQjMm+BcBci1La2bE/A736fAARaBmtYu50R7oKbyWf+1bBhZ9Fj
X6Sw2w0AnS0S60//uNcPyfBz9dtbXF+E1QIIAAD+DlKDEFCaoTGlzpNHUl0SkCDGMp6Ij0c7EHJX
pM6sbjRDnPvdiG57IwKAQcQNAujVNNlZ0UMJblF6cocIN78pvsikg2xwh1h64xz3OERgIAIqR3zk
NacBwvHGnOmuJJG//QjIdV5viVQcv4LeebWbmxIY2D0hvA55zWVz9N4Y+tAuiTJIBBBvmhdk6lKX
tcTJEHeF5Pu1/tYIxg0Cg4V8G9wBsDlFms6xhHdr4To2yGZH7JCIOiTWkG77ReKc3xrwGCHktbYC
CMJvygJ8Ivjl9UDsXvmFgBzsFAl049Wacr/bViZL1+1SX9wQWQNZ9QOZOYoV8nQSM/sg1u50wVv+
PYAA8P4hv28z1GseA7G7q5CzQXfoE2LRB7jc5THO6ZLdDn05Gz4hOR8/GW5we5MQntUS8X96hxDh
FnLAV3GpEWyxgUrrxxAApVvopWd+BhFtx2uyNnQKUXgD6BJvN3kHwXVe54EGcXmXp3kJiH42lnQp
0VK7hWq7pBCcpn30hhCF132eFm8DUHQd0QCmd3rOB3wE8X0VEX6wEV3NEz3rd1AalUCc9xCcRmQ3
R2UdOHw0OFpgR4UXoW07VnLJhV8FIYQfZ3BAOGXQpYDnp4Is4VJsFE0d4QBiFnNh6F1Y2BCulxEd
5wAokIcosFXXJ1px5l2x1nuSV3UkF2hsWIb+bzNgmdUSnvRJ+mQRTOWGAqFr2xdpdSgRWwVRAqd1
BsF6hwV9z0QQvKZ7vkYD5tc81zMnDdg56DYTrgQSXCaD20daNNeHEMF/VGYBmrQQAndrDUF4F2iD
GSGIZECC3xZkoAhsi3Ivq0gXsANi+BRVH9GLssgQeJaBFziAtlgRDFQBEKA+CgFWnGgQwNhqGAGG
9sZqmWd1dDVgaTMofJVjOEFWBzWNHBBW44gQr2Vt13gQNbh4+6cRXARHF+QROAiQEoGO2qWOVscA
sYV1k0iJ46MpzegW8qgTGSUBvdR/GoGPG/YQd0Z3NIiDc3gRqlSQC+EAJJUQXAhcroZ39yb+EHfX
Ztk4hvqoU811AkhGcMQXYoryRYtIQfkUEfcUETyZEAsQe/q2aL1WkhZxkhCQQAmhhQORAny4eof1
bTPJEIS4c+NlXtU4R8v4kzIUlDAhAgxhTg+hhI+IEBKJEElZbdb2EJfoEJi0EJjURQORQIdIBiop
Ue50Ank4iNz1kgXRhDP2X5cWj5UiLNf0EYjmEGjZENL4EBkJEo8XEa+XEBAAARakfBz3WflIEeUo
gkE4mRahmGFZlg6xK5FhYDURAReEmgyhUZapUm2ZmvsYEdtoEIt0QeCoiYDpEbB2gQi5e8QIibE1
gWW5OBUZNMdnE/QTAdQ5ErgJElfHmwz+oUoXkHYH4ZkoGY4+pxE20IUX+IVbWWTMx20lQAKIiTwf
8yaMcZE30Y0lBBJ59REhuZQdkUlw5J0F0Y2deRKZWBAz12sxkJ4a8WV0tVMtZpnzExhEE5lgAZs6
UQFvBJwv2BFsGVQb8V8h6RH+GZy++Zsk2oamt4cI8XTJ6BBUxqBhtpoIwZZ94UEU2hV/B3g+cUnA
mZtmtVwdkZkgoZcJ4Z8XxJdSqRFUuWr5lxFHKRCcxlKXSTJKc6NckWPP6UZwVAEb2hHXKRF/uRAa
l1gawBB9aRCZZAEAuhFZ5U74948S0YMfmRAxKhEt9UkgFDsTCo1qY5ZAQZ3TSUr4mZ/+2QZXDBFf
EbGkB8FF29mdIMFbojmOHRgRNJZkXgpUGykXVZqlVROdRmGfXRpMfuRZJOWmCYGoiaqoA/EAnumN
F9ASfzmcA1Geh3d/D2FkIzGUmno0VroV9HkUTsSlOSFwpaoQqBqa41miFqSmLiGOodWbZMpfIkGP
PjoWNtqrbeOpSpGhJBSqBoFGAmFEHjqN4rgQx/oQm6h1/umoIWFyKRlaVtkREthp78lahJoWm2oY
6gcVI+StB9FLw2SbHnFcJuCssNgByYqmabqmHVEBBDmVETWYHqFYCFth8RdMQFWtV5qvhfGrZNFS
QKoRBKdT3CSjFJGHKpmPuXSiHeH+RJ55EKrqYnblABf7EZiaRvFDASQkFZvKqVyjrWfhSme1EeiF
qxzBbCq5EOH5ERWQl/95EKD1cxFxrgShbaOJEUPZSxDxP9VJNx3UsR6bFroqEr14tQ9RoH5pqi1h
pAwLqT5ntgdBtQNBrHCbhqC6FNfqszwLenIxPyxEEvs1sxHxf4f5elbrEiOKEJtYEXIrEOnqVHka
EhgKnPdpFBwrPEDLFmgEAgH7tyBBWfvFnOLXffr3VYsLErqIAXi5SglhsBTRuGTwuHZKjyJRQRp6
FEOErZ3Kt3SBRXg6tA8RWQyxWr44uCDXuq7rEQukpixLEGcKsxbBAHOJvHVbECr+BbzKe0EVNDa8
qrtV8Yx6WxQZ62XraRBPGoAaeJwEoWdSa2JIuqwjpBBNq7rYyXMfcb0aOxG/1LVBcbkSGrZ1oZZK
Nn+HqREdaJj7l10pGxKXlJfM+p2t2rwYcXUQuRE+JbndKKw+kbvh+xSoozDe+xSV2RAmAGYOabIT
8X2Fp742gLYj0cCrJMFkAL/f6BH+NXeLyaEh27DcqsE78cHrxKeW00EdnBUHAHNIRgaqicIPoZB5
d5hOmahgtZ25xLACkbqa9MAKUa8CQW057KXUKhI8urNNs6cOYycXU8RkoQIpoAKiSxHJaW+jSIoc
cbhKy0oKYaT+OhDQqo8q8MX+BvWlIWFBglo0PyPEauEmxqTGZrFTFSwRIqCQosWQHfG27UsRC3u2
EFFrg7rDtYmnDUGbNmHGo8MnifgZ2dlVDDFuXakRJyC7AwFNBOGZcLQQGGrFCbGZC8HJDHHEUrpS
lhnGCiHKMpGjrcnIWEEoohLCchFZ9ssQABCTDmF3CYqBFcGHehi7yeu8CsRAA9oRgVZpGgfIbgmH
CQHMDzG+NtOzJkQzJoPMZ4FkJ+DF5DyClwcA6kt5M1nN+ewQIdDCipuwCDGQ8fsRNQCAB3HDIukQ
3caDH7GRArwTaMPMWCMuVfQZR0ywBHHDkoXC6tjPZCDJpbuiHsh5l6ywWSz+wxJxYlYGe2MaESZA
wBkBrtI0wpPTvfCMo+eT03EBYL9IyZSHET9Gxwzxlw5XEFisxRiBtiA30mQAWxNRXNUbETbdM/4b
Re9D0YjxdjWJnnEcgE1a1DFbEHnJslxsEPPVgU5tEcRavBwqzFa9MzxdodAjKHOtFwg4yRsoEGf9
psEI0qbbTlNdECDgwhDhYB0I2EY5t70IEhENExx813TtkxMUG4FmigeBz/j8EfFWgwqhhygAywym
y3QoaIXXEd0WuoPtEI2YvyIx0ZL9NcMS220BTVFMgputEWB4kM7relfJ2G+7EZu51gRx0Ob4rUmV
VmHlESHQSzpb1SjDzqT+0SpaXRggJ3IWwXtfHWcE0XTlyhHh7GbETQaMZqt7l1Rj3VVs+D+uPTRy
fYKtiRvXnd3iF3KKfRI1UN5cebz+aBF/aagO8QAXoEiNI91Gpy60LRdqvV02GX3SHMuR7HuFed8l
sXbErdYJYYLoClbt9K0ytqzrdtPvXYTx/Rp5nY57baD3TOEFUZopPhIH8Nv05dk3aJyeNhGx6k0J
0Z7vRwLuhcdx/bXpdyrVbRem2KJMGnEsLpPjRuOu9ccLUWLkd54McdpVrmLizRDbvLpl1G6Zs6ko
xHclThq2HcU/3coJsds2fkbw1W8b/cy57GvmfUYrWn0fkQGYRE/FzDT+Ra6vRP4bstbVaa6gINFv
KJDKChHeP4bAECEC8/aHtAgSeQ6aIKM0RoUbf64beY3mQfjVJKHQC70QkD7ep9fiEPZsdx5YLAHb
w4EsfQ4YNCBt+Pzi++PptyqnmzzO4HfqXtjXhwdcOMjoD6Flo0d6JxHZx0HdtXGK0bfiHuGGYhYR
9Ax+Tq7h9IZzESayMeZyZIBbm4QSrK4crp7gbSF8SW7NG0Gyt8bEBQFbj5zhznacSJ6BAzEA9wUS
Pv6A+hLuzZHprXFy8y2zHYcQB+Bv/DYQiN4QkNbfUkcG3WV4B0DaJqXvr83nrw6UCG4bGsjg2l4C
bV23gnnovIwRJ17+Zfo9q4YdZZRuEAgGElR08eekLrSBc+hOETUbuxXL7ggfe6FuwG42uLwujASR
Atg2emwGEcY+4iCcHeNu4tZ+EF827FAvrdL+0qrciXbuaMGeEChwAoMF2UBMSeQ+R2OuGsy+EDJN
XGnvEDhM8tJWmNPnEPU1WorNW8202kK+9OCh7KgRAuF8q2u/4ael8wRP8gRRXxEm7AhB9w74Way6
6hYvag4R5qDR1zE4EZQ1r05qzqVubzhI6lIl8S0vMDiNHk2PG5cPEQ8KZoK7+Yn3YNlOnn2MEpdu
boVW9rSR+sN7lBU7sCbwl4RPZyrG3bG81As2EKpOEgbeHqcvGwL+1qBM7OvKeWsn/WoPf2USLxGD
+U7itPK5ozCPgvutIWDOFVs4AV6SKBGMpnOGzbjd/wBHTztKj2PHDBsHgFNPDVvmfxPUiHuQFvcA
QYZMCoEFDR5EeDDDQoYOEj6EeDDBxIgVEU5MYFHjRo4dPX4EGVLkSJIlO1LUmNHkSpYtXb7U2EFF
hw4NGMCcMOHjgRIlBGrgoEFDA4cfZcSQIWDAAIQPHmR4OlIowwcsUa68ClPrVq5dvX7dqNJiVrBl
zZ7l2CHFzAYNXEqQMAGuTo89fwp1G/Ko0gBNnT4oGjKDhoVVS2K0ShbtYsaNHW9V/FDsY8qVW5ow
oUIFg5su5cL+hRuyZ9u2I5cePECGYeHAIAsfngzb8mzatW0XjA0x923evX1yzRlcgkjSpFvaUL3a
qWPEWCP3hh5duuyUu6dfN2u3a/DPIoUOLd3yxlPCUBs/D4ke+3r27XGHdR+fK0+LdEdyDx2SZgfw
CFOPvIGqxZoziUD5DkRQOvVwsy5BB1mKSy6SIozLO5qGak2g30RCAQXGFvQIxAdHJPEsBOArMcX7
cgJNJPyG864/hDYcaaGyDCQJRxV35NErEUXskUcKKBDORe4kfOkCDDIY6a+/ugIyrAaDpLLKwzia
0koVhyQSSZCOtK+lByy4YEyRqFoOJh1FWlNLN98MMUsG4Qz+kksWV7zTpQv2LNMw15R7Kcrq6CS0
0BBRNDTFIXP6z0gYXcpgyYUs8NOj1cxzTk4sEzgxUU8/TehHTUGV7rMWecMg1dfOLAwC2EaVklRZ
ZyVjVFhpre3IR29T9QJXa2TyysRuxbVYHm01dj07vXyJgoJAaNTSDH59TNCKrE022xRtJVZbtLgk
clcIhxwOBBBCsiCDPZnDVrduvYX3QVjfjferRcNkSbj8QKL0LwsGpFeygOslOD4gBy54K2ibBVfc
jhjas1If2xUY4YQvXg9ZjHsElwKHN4pU0jK/ajM9izdGeTpRU1a0gkU/3ijVJX2F8mQGbWY55940
1pmyCir+IInLChe2NNWRtSoZJIp7ZlpBnps+K4IIXHbWRdDiOte2pUPdGmqveeP267K4lLrqj8CE
+byuJcJZbLcrO/htrij4ue4IQhAhbxGijWiCe5llt+2k5SY8Y0QLZ6kCCyywW6S/K0Og7VolR7zy
AQ+3nCQyGffY8S7TvrGlwTMnHbqVSx+Jc7Plm6jTV1GH3b15Y/+IAqlvN3jtOWnnPeOne4+o7iEj
aE93gUYHPvnZwlb+IcV/tj0E6aXnmzbksWw+e5V/176CCzgn3mnRjde+fK6YN79x0zkd33z3FcT8
/duul5Jy+e+3Klb8rZec/P3/Fx32AMiu8dlvgAdkE/f+EFiz9i3QgZZB3wMDRT76SdCCkFHgBU02
LA12sFr682CccOa/EJbQI64biwnHQkIDqtCFEYnbC9nmkgrK0IYjiaAKa3gtEt7QhxCJXPw82D8U
/tCIUAKhBnforiIe0YkYFOIBl+iuJ1YxdCl5oP+maEUufiSH99viRXrYRTIKLIrZ41T/yrjGsjTR
jOZjYRDZOEcGnpF2/WshHfVokAzCLoxsy+MeBXm8JKLujzMcZCLrmEJDCm6MioSkRDYiR8S1joOR
xOQir0W4Q/IxkJkEJSGx+LVOejKUp/RRIXNGuUei0pXvsSPBSimQyH3yla6cHcq02Mpb9nJ3K0yY
JRP+40tikkyA3prl5GxZzGLmMlksXCYzpRlDXEFTmtc0Sx8LZU1sdhMsX6RTMpPpTXLCUJtBEqZz
3FhOdmplnReBEzfbOU9jDqpKu4wmPenpTBWNM5/6BCg/RwTNfwI0oOCUHSULpFCDNvSKo8wdHh06
0cupUnwFpGhG0RKlgiYQoxoF6UaPCTYWhtSkFbVnbQh6UpaehZpw0yJDWzrTejIycDTsKE1pejqU
ZkqnP+3pJrNZUqAWVaSx9OlHjbrUGyG0QHjMKVOXKtDXtUSmUsXqN0eKQ6hm1asAm+TA2NfAr5b1
qBDdlETNutaz2pSHXWVrXF3qVFGypJZyxWtQYcj+tXcqLap5xasz/flXwOb1YCstbGLPg9STEFax
itXUycb5WMp6MUtiHWtlNcucvaZns5+lTIO6NVnQlnZTkkmraVXLWYT09Zerha1eL+vY2K42s7Wq
WG11+8G6vna3v62oWO4KXOKqDSO0LS5xkZtc5jbXuc+FbnSlO13qVte618VudrW7Xe5217vfBW94
xTte8pbXvOdFb3rVu172tte974VvfOU7X/rW1773xW9+9btf/vbXv/8FcIAFPGACF9jAB0ZwghW8
YAY32MEPhnCEJTxhClfYwhfGcIY1vGEOd9jDHwZxiEU8YhKX2MQnRnGKVbxiFrfYxS+GcYxlPGNm
GtfYxjfGcY51vGMe99jHPwZykIU8ZCIX2chHRnKSlbxkJjfZyU+GcpSlPGUqV9nKV8ZylrW8ZS53
2ctfBnOYxTxmMpfZzGdGc5rVvGY2t9nNb4ZznOU8ZzrX2c53xnOe9bxnKAcEACH5BAAKAAAALAAA
AACAAuABh8ZwGdqZFtayHMS+KaPCS5SZan9/g35+i39+gH5/fnmPeGq1cFi8dTq7hh2umBKpog2b
qwJ3sgFgugBhyQCD2ACm1wC92gLO4wbg7Bjl4DPq5ULq8knq61nu3mrg3nnP7n7E/H/T/X/n/oH1
/If89pP+6Z3+36j+07D+yqf+uaD+q7TmoeawiPKde/a2cvfSd/zldPrzden1b9j8ct7+huL+ltv+
odP+q+X+2P7+/v7+/v7+/v7+/v7+/v7+/v7+/v7+/v7+/v7+/v7+/v7+/v7+/v7+/v7+/v7+/v7+
/v/+/v7+/v7+/v7+/v7+/v7+/v7+/v7+/v////7+/v7+/v7+/v7+/v7+/v7+/v7+/v7+/v////7+
/v7+/v7+/v7+/v7+/v7+/v7+/v7+/v////7+/v7+/v7+/v7+/v7+/v7+/v7+/v7+/v////7+/v7+
/v7+/v7+/v7+/v7+/v7+/v7+/v////7+/v7+/v7+/v7+/v7+/v7+/v7+/v7+/v////7+/v7+/v7+
/v7+/v7+/v7+/v7+/v7+/v////7+/v7+/v7+/v7+/v7+/v7+/v7+/v7+/v////7+/v7+/v7+/v7+
/v7+/v7+/v7+/v7+/v////7+/v7+/v7+/v7+/v7+/v7+/v7+/v7+/v////7+/v7+/v7+/v7+/v7+
/v7+/v7+/v7+/v////7+/v7+/v7+/v7+/v7+/v7+/v7+/v7+/v7+/v////7+/v7+/v7+/v7+/v7+
/v7+/v7+/v7+/v////7+/v7+/v7+/v7+/v7+/v7+/v7+/v7+/v////7+/v7+/v7+/v7+/v7+/v7+
/v7+/v7+/v7+/v////7+/v7+/v7+/v7+/v7+/v7+/v7+/v7+/v7+/v////7+/v7+/v7+/v7+/v7+
/v7+/v7+/v7+/v////7+/v7+/v7+/v7+/v7+/v7+/v7+/v7+/v7+/v7+/v////7+/v7+/v7+/v7+
/v7+/v7+/v7+/v7+/v7+/v7+/v////7+/v7+/v7+/v///wj+AMkIHEiwoMGDCBMqXMiwocOHECNK
nEixosWLGDNq3Mixo8ePIEOKHEmypMmTKFOqXMmypcuXMGPKnEmzps2bOHPq3Mmzp8+fQIMKHUq0
qNGjSJMqXcq0qdOnUKNKnUq1qtWrWLNq3cq1q9evYMOKHUu2rNmzaNOqXcu2rdu3cOPKnUu3rt27
ePPq3cu3r9+/gAMLHky4sOHDiBMrXsy4sePHkCNLnky5suXLmDNr3sy5s+fPoEOLHk26tOnTqFOr
Xs26tevXsGPLnk27tu3buHPr3s27t+/fwIMLH068uPHjyJMrX868ufPn0KNLn069uvXr2LNr3869
u/fv4MP+ix9Pvrz58+jTq1/Pvr379/Djy59Pv779+/jz69/Pv7///wAGKOCABBZo4IEIJqjgggw2
6OCDEEYo4YQUVmjhhRhmqOGGHHbo4YcghijiiCSWaOKJKKao4oostujiizDGKOOMNNZo44045qjj
jjz26OOPQAYp5JBEFmnkkUgmqeSSTDbp5JNQRinllFRWaeWVWGap5ZZcdunll2CGKeaLCYypYQJo
lmnmhGmqWSaaaz4IZ0FqkjFnnAjeSSdBeuIJIJoI1HmQoAL16ad+hiJE6ECLHlpfAghA1GihkzrK
XpsSVUqppe8l+pCmjILKaXeYXiQqo6OS5ylFp6Ka6nf+q06UZqSftvrqcqVqpKetm946XayyGgrs
oLz6+tuwkgKL7J7GIpdrRsv2WmuzxAXaUZqsZkortbxhu1GgxRIbUbTcqubtRuQ2lG645Y6WLkPn
elTsu+12Fi9G4Ja0Lrv1WnavqdamtO20/Yr2r6n86hpuwgUrRq9CB6+0b8OYPYtRxC9NTLFkD0PM
sEnzfrwxXh0rWnJKC4+cmMUIiyxxyCoTdrJBGP+kccx85cvRzDUt7DLOXwF6Lc83vfsz0FoRHerR
Ot2M9FqQMm3nwFY5/TRZNWea9VQ+Xy3W1uNKXRS9YnsNlNKhmmW02VmBXSvaTlnNdtxww811pnPT
LbX+22XJnfdQddudNMx/BwXu3mV71XXhPNnNd1xrM46T44n3TbjkMT0Or+Z3vRsw5i8j7hi7lYM+
6Offlv6W0aqbHrjgdrFuuryBbxb57C0P3fpei+MettiwD+a37ybrvrtgwxPPMsKtpUw8n8AH/1jy
hXO+kPUGXy7567o5/zf2CUlve+9Xgx/+8eNrjbT5xIofUQQUUBBBY7dvTHlMB4gQwkDxxx/B/PRT
X8HYRzP3RSQECAxBBRa4QADSj3zGImABeVIBC1igAvKLTP1SpTN0SdAhEpjABCpiQQxKYDILo9qh
7pcSCYTQhRSJAAZlSBnZ+amDGsEhSkQowhNOZIH+/vOX98T0Qei5ZALx46EPFZI/EThRBBW84Awv
A8EtFZFSPMNARUAAgiSKkCIXuAAQM2NDLbFQIw/AgAUlcgAQkMGLS4yIBcSYQc1scEpXtBPcwngB
CzzAAhVx4QQkQAGKxC+OdhSglM7YEQw4MgMXeABFkEiBHtqmjEtankXyWBBHOvICEDBk/yiAyIu4
0Y5DPBLldufJSFaEAhg8JEdCWMlEhs1IedQhSSyQAUlOhItdPGQpLdJDGJIxWEJipEMekIEMXISZ
vXQmRA6wP4EMsiOUtCQqZeWjPFrvAeAEp0Uu0Etx0mSU1+QM6dAXIU1WxHzNbKY5JULOCMjTlxr+
4WFFKFnJYVJxnTRaZUbiWc6KEBSfGRFkCPd5yEJ+hmww4iTaDmqRDGAAkgi9CA+1OREl+tOWt1yR
3XQ50AxoACPyJEgDOnDSSW5UAqeUiBfTCRqInkiiuzvBRUhQkAb41KcuVeIrvVgaTIKobiT1SDPJ
kAKLlEClPwVqUD/akP7RFCEHsB0yO+ROVqHvAQ4I5w1uUJGsDkQDHWCpVDvqQmOKcoQKeao6SXcm
gaIknuG0wUbSqoG1RmSjHP2IXD1j1HaWLV0QiOdFCNpLMphVAAOILEX42gAymMAEEgHsBGLakcu6
a6tysitEwglOQBoUr6EUCAAiG1kBTCSqlbX+7GAd8lKOMOC2t9UpaWzKIMF1LJ5hzGhE4tlXgrCW
ta+N6kBKUAKz0vaqGcHtbVED0Dy97mOPxChGJIkCFAxEADKYAXIj0gANmLevsZUJA1SgAukKxLnZ
4yaBcLqRi14UlCUwgW4tQtaByEAG440IZdM7E/Z2YLpkYO5pCoso0db3oghFQVP5q1eBRDYAZIiB
RAaM2ZM0dyHsbS8DEjxb01Q3P5zU40puUGGKOJcA4hWIhsnbAAdYtsMZKa9fSVzihEjXs6vh7aMO
a0CFtLgirIWsjGdMERP0WCKwrexlcdwQ6TZgxK5h8KWuaxJoCncgZh2AkiNy3AEQJAZMnsj+hyti
3qhS+SFpxS2BHVID+B5TkVumXUpIO8+DJNnMDxnADMQ7AAK49swXYcACFr1hlqKXIga+7ZwVQoMa
1KCmdE1PV4PFzoEw9ssWLnNE/hvgM9v5IdJVtIApa+OJhBjBDUlzaLRMKt/+jJkS+fRl9/tdGQgA
soB+yKAvLOuLLPrYWIZIWne83FMbBLcOQTN15QseWx8trNEcrjxTSwYJ95cMA4iBryUrkUNnOCG/
hgh7kd3dhzjg3TVOL3MVXBEABODeAoGBtM1VxeukGG5eBmuuG2sQG1T415LdN0WK/WuEPyTEC0j2
CSZO8ROA4NTnRa+TnyyRe98bAACAAWz+Tmwda3/k0xng6UbC7OuBFBsiaGYywsUcbIaoYNHJfkjG
a8yRhgsA3wipQQic/dBM/4rLIfm0QEhAgnlzHCJ/dvnLYU4GAaC54RiusnsjsvNWa8TnQC9IpYPc
b+UoUySoxapFxAxsc8v4IjE4wNUhO3WDHDviOXfIeb1OERiIAL5YB0BBYkCD1xjd7NxLSTO53RHw
+nrMiIb71TE8dhDfHOcqgYHmEfJrwUd+5GU/Fn1ZQk5pesTqMYCs211O9ED/nCCXVgjEI46CipNE
5AnxuL0zrHAX2wu0wDF5S/j8EOUyRAapHwAAeo/uhjME4QFwew2ObJB1550ME7/sxSX+wvbVax73
CIm+xwMAfopYOvb2Ovxu/t3pg5Reuw2JskPcXvdQ/zoANT+Iz9NNkLH6+PoYkWRK9n0NsX9ZNxFo
VnjuEnqxwX7thxCfxnQS2HT0NhA69lMLV3cGqBCoB30HcQPbVxL7Z3UQEX1YpxAmOHjMt1vURhur
9IALQVFqNxBppVaTRnUHMXevpxA6WH8moYMHiBB+B3j353kHEQD2BnK854PxFVKgFz0qET8OgVc6
x2EW8XIxx388mHyUh34Z4QAmZXoLkYX5RxAEGH4oeH/3Vn5ZBnz8Rjvt50L9NBAI1HqNBlROdoWn
lnoCAACVx4EF4YUW8W6EyHcEYQP+QmdWfHgQZ1gRYBeECWGHc9WCJnZ2J/FSMFVNHPFTDhBbT0cR
DWdmgkhn1DcRYUiI3dZdKDBW3/ZdDrdkbFgRJvhzRmgQ56eJlfg2C+ZgKzFKpPQRsOV1axaArIV/
ZDB9E+F/bLZ3DsBrCHFcdMeED/FY95eDNKCAzXM9cwKDncN+MoFOVLWM53WDGLGBZNCKEQGC8PVH
aqRFCZFx71aA+8cR4GdvP3eAMTcbwtIn3EgXsJNiQyVMH4FWbUaOCqFojIYQQDgQ6GgRFmRBoHZW
GpABhpgQaPZ4q9d3m/ddupePt1EnntKPcOGAOEFIggQS4+gAn3gQqaaQc1cQDTn+ERfwSX0UkQh4
dcpnEY3oij5XiwcJbQfBXJKIQrEikm0hfDgBWDAFTEMJEWtVgQtxdxFnkelmaY3USqaVEGA4kQqR
iDLma5CIbrK2kZx3glonXdl3WVCZPiqmKGTEizgBjhIRQnAFEWuJELMHgAcxihjRSg+gP7hIEIVo
iCnAihbRdgKwk5wHA9VYZXEGa7O2KJNilGoDly4hAgvBT9DFEAoVjkE5lAuwblNJig8xkxewEI6U
lWSQQARBUO+mXyfQbuU4cxlpEM7VeQ/HXkBZdJUiLDVEZDaBmQxhVZ5ZEJgIEqE5mhBRigfxkH1G
ERlHkaengwrhdxcRaQYpRA7+sSsaZJkvUQFO9FyZpZQg0ZIQEZMFMZOf5EcJYQHuqBAmZV7S2RFZ
qIUFQZYW0QAiln6LQ5ld4Y02AT8VQEMiQZ4fgXN4l46oiZUJAQEVVEELIZ8VWRE28Fg46ZOKWRGp
RmBORwJNKTwf8yaMgZQ2wUDy41AgUVsHmpce4UkYEJEPaQGMRxLKSBCQl2H4GV2PyQANMGUPQUgo
+hdEU2RjgVP+mRBRxEAO9BHF5FYdAXF62Zdq1J5YOaMgsYr611pmJo0NYWcdEGlRmhBtdZJ88UFE
Chab5lU/EUYXVEcpqqIeYX1hihGBSRDuuZ4JxJoaAYYU6YwDwXatxaUMcZf+BsZsw1lJgRU7SnOm
QUNkjIoRc3RBS8qkcAoRnagBE0oQDOBdE/FumLoQdUoQniSjIDGYmep4r3gRdzkQ+ylTxMlZcmGm
AFmZ0XOkEyGpk+oRBmqpg7kQftoQpooQ7umeChFGVroRYdhMmYp8fFiGDOEAbXZjIQGOwBSrR/Oo
/2lrSDFK/zMSg7SZDdF1mYp9FJGs8WgQzmmTJAGPfFehUgdZYbkQUdWJb+YRSVScZ7Gotso1jqoU
D9pAOtF1CvGr4Xpe89lJNKmuIsGuDGkQN1p8BZmdGTFIbVWXRzmk2LoVALoUcwREuYpVpwSkFouS
KTmw5epoBzsQLooBrhT+EkOnEBIqEIXJETs3Zx/6EFYFrvl6rfsaFSTpFJFqQg/BRWO6UIKVX2Qw
ji3lEY6WqS6qmh8BAZ/EELJJs6y2XKtqEXI5EbBUAVRRRBk7OB8xqzOBQVyLqDrrVLMFWx5RtQqR
miPhRxYEAVArEHzajCRbXPMGEui0WbDKEP9zoj7Lsz37FBubFlu7cj0VseOajAMBrWJ4EKHKEXxU
kwYRrBRBsGRgqiuJEfcqEFz0EPDTPx+LFPpaGD/LFombt+jVuGVpEDXaqy3hoi3bmq5ZEZrLjK4L
EwzksUshq4VLN2MbtkXRP/hqESZAkIbKgQhnbgdwZHd7rixBu1ZqsCn+GxG5C4+B9EUiQQElZLZJ
cboyo61w0UZuVLQhAWTRGhG06axJa7C7O07viRDreRDxSZHxixDZu3cUgb4i8ZBuShRgG7xMkbpy
EUyIerya2l5xlRFW53MIAa0xCxJ/FEmniRAhULcEMcEUsQAwa175axB0WUwiIUPyU7o9oa8E/LuJ
Q7xLsbpnuZsEkbUREXN8WJvd1rQrl6chwEcQmRCTuxHmqau7+hEm2q1BIb7IQ6J3oZkKTAapdn03
O4ZLCFk+eY6cShK0q8ECIbVhVJ5DjE0bJRJJCrA+McCEgToK48JQYbwQoV9femCQqRGN6HwFYQM1
qsUM2pwPSbcHinP+c7wRlfoRbDpFPKHG70S2WEO4j3EATuejZPBqgVwRGTqPjsWXFLGVkXsQo3qs
ZECTtRuJEiGakzyx/gsSQYvCMiGrDmMnF7PCY6GbcwoRsSgQtInDgyi7bwtKCUG7CnuOEQGlIDHC
iYqzDmHGk/MzipwWbrJOsEwWYSwRIpCh33XD7ltRyiq9FUG9DoGeCXFzs0xMg9wQxMwQwpnMCjM9
fKKLoBHFEOF2TVmfuDwRExedfEdNBmGab8uyvywQzPl/W7cQjvxXQjWeFLsQ50wTabqdz1wVhCIq
bEwX6yVipVwQ9hh2C7F5OBmvD8GKqigQDFsQeVpaMsrFFWGVMVz+0QVBwwihT5mVs0/sEgPc0FVD
MyZD02MxZRP3pRTtEOO3ewmxk435fG4XAnj8jhPZuD3MpuzpEbFnnwsMziq90p1rSlzUt2fMNBHd
N+KCRZ/hyMxVr7IczrNIi4yYo+Wmeu/1YJ/ktRlhZzQAwQchyQoQEZh1qUv71jFFnI3DyFR0Pjj9
FpIWa4wZeAZRy9wHjQ6hyQuamv3MEHkMjbUpycnlU504zIc0sgqtxBXTPludGB4JdmaI1qCIkfP8
uLpMv6m5pFP8gTxpxx0xjsuLER6l2TCBNp+tFoISL4GNFx5pozu41hsRc+N22gIRT6i4EE1dECCQ
x8v5rrCtqhv+LNtMCsMyrcIPJS100ttxYWnXiBAgh4RArRH5SIZXLBCqWHv2jBEsNhFWad4bQW8E
+Wj2at0vszPcjabDkt9rQU2YTBDjh4QZoZjRHQLTZ5jTzcEX8c8McWlmSRCtTdUgvb4bEQKhO0ox
rTsexN9h0Sq5fRhgd94O8X2IHYquNZQKjhEoXXVQHX7RJ2Y5qKolkNoXgc/8U0stgdscvsjbmRuF
XYS51+L5thBlZtwkYWmWzIECGOO5XIijRU4XnBMznY2bQxsxJ3KG7eL3COHT/HzWLBMmftrmaBAr
qHMhDWZPlq6PjTJaveNQ0+Ov8dsALuJkYIIfJxE2nKokcQD+CG6jC7mFD87kEnHmKz2BTEdQfWQT
Ou6Cp/LhdnGNguqwIT7i+lZ1c8fRibYQ7X1mzYrpS5Z8dL5kf0puEQrCIWxRF5UBJq0SA6xCsuHh
puHf//0QYx7UaJ16nh6JsDlxBRHNBcfpi0jUGUl0aCZqDAHCEIHqKXXbbd4tjf4b0pblZ43YHUFx
3eXOXYl+Q10RIvByx0UApH6VBJfjSpNUuPHsuiHnuHnWLYFsUy0QSA6vRs4QxVZmMA4SpUfu+D0c
yOLogUEDxYaE4s3l1A6xea1ul/fury1mEU7mBSFohDYAdV1WCUF8KDHlxgHrtIGNBRHgoV7ZPDfK
1iex1Xz+wxhW5jCXZjMAYOFOER2qcoi+5szjQbjS6G6eFucXflgn4JvItqOsnNHWrJ9XEWkWWQXw
EYcugyJxRf7e2fDyGpL443e+ERnXVxN6ABXH6wORah4c9Lg+eBjBZGz3Xgxerko/vPh98ytj87aB
ZlgO5BjhdEnraCHPELHZXe4ezsblkpFO5jGw5P7s3GQATVE+hds2vM1eHRovG8X28Q2xtxtsg652
eUCfETN271BHc61VECmQxXwm84OP9hueHf2u9mYh5wcpx12KEJw4298spxSfg4j5zv8FbPFaeyYQ
8xmDyJtk+jUE56vB8QwhZ1dWEfIXzNYneQZR5DWcfNf+fNxnz+ZpHx6LbxoGPussyaNXRvLvOGAU
MV0ND/bAPXPsy4UxCFyePBKLrioO4eqg0fD6qQIH5voIMWU1SN9qC3cEgXzj9vxdyuAAkUHgAzIF
DR5EmFDhwoQIEjCEuDDBxIgVLV7EmFHjRo4dPX4EGZFixZEhTZ5EmVKlyQ4pOjBg0CCjCRMGNXTo
oKGBA5MlSoCMEaOggKACBgQwaePGyo4OH54syVTqVKpVrU59SvLqVq5dV5rooKJDA5kWff5MSFZl
iZpkNHQMOvSowQMhb6TwijAqyIlZ8/4FHFiwxr0S/Q5GnFiqTzIwHTOoWNerCbI6y26MEWCAUYM2
TqL+QGHwwUCqfVEWVpxa9WqsFw+zhh17IePGjyHDJpv7csYBvTcPMHhjqckTJh4cR84Utcflsp0/
h67X9evo1QcfIGEw7EuYuDV8J8tzo2/fCPGeFJie4OnmG01bhx9fdvuD1OXf76pCv+OVEyZsPIC2
BnACTzyNBJBBAKOAOwiF0TIIKT3STKKPMPvwwzDDri7Ui0MNP2Rpv5hUkkCCCUzciLabwOtIhhgS
3Ayh4y44DiQJH4CArwoxeg9EH38szUODhASySIhoKqg7EktksiPGwHurRRjpIuPBC2hczyP1PtqR
RyKNBDNMi778Ukww0ZrKPzVL7Igy3XYDyTMJM6D+UbAeQ7rTTD33JInMMvnMkDaq1PRPgo/ehBOk
Gy6Q8IIc/+pyOkAnpZQhMisNM8CIJKCAApAIPdGjAQlU6yDJPLrhxrzy5DJSTF8tckdXYdWwxBMN
/cjEWz/CKadSDUKzI9AecNSrWUX6k1Zlf0TAtWX1JJRNj6LFlaNefwWWuA2PtZTbZ7/FUNZkwYVu
gk4pKHRaUKvtaCeFsgOJWIGs8tYwcu8FtMxx8Y3t3HTVXXMlKz9CLjnl6k2IVX4XjtVPhjH097+P
ohW44Cw3Su/Ki6Hat9uHPzbzUpDj09VEdjlSk6mM6+woAwy25LhjhSZqdmSbjRT35uiolQ2Dl+n+
3DgjgX4O2j2EE5ZZZ6Xnc3bpfjv9FzafX2a5I58zwJGvlBR2umv8RPY6tXPRPVkqEE7N6OqiN1rb
S/bChhtEh+MeLOKyTTLXUzJAAKEjC14ejGuOjqa78MB5NDwwcyfouz8mJWicowcsoNECwAivL+nE
Nw+sS8059+hslfIOmKMrr7SgbakEN/pz0F83tmnYIR47VI5cfhmDqoN0fcjeZwf+qpyDjy9vqD2a
2mfLq8Lc99+Jh7402aOvqoIKQPIXV9E1mnp3lVg3mnrxnfN8fKkiiKACCiLI9XHII+ce69WfB998
+zuX9P6TxkYf4KhTq19Gmqc/Am4NbAXsiPX+FBiBEIRABA8UAdogsrj/BW6AZAggAjXIlQNuECOU
W6BH7JYYh3zveR5EIZeml8KIUM4C6rsbRqAmLTsZ8IQsxGH4+pTDFlovfZ+KIQcTUDM8XZCHRyQM
4pCIEP6x72sDNOISpZg/rUyRDAo8lxPhA8UoWtGLIqEiEivwQvVRoIFnDIEEVZPBFX7RjfTqYA7H
+ML1VeeCbHxjHikURjn6EDo0M6AeBbmhNg7ycnfsoiEVmTA+LnIrRkykIyU5JCVOknn0i6QlLVk+
TR4skJ0E5eoaGcrWseeGpEQlJ1FpIVOu0pXKGeUrM/e7TMoSlUSsoi2d9z1d9vKTuZQlJGv+6ctU
xlKTeOzTKYnZyxKOaZUnHOIypQnLMSkTgciECCCnuU0TFlKP2MymNbm5zTi+EZHiHCc35+ZGcBoG
nelMpyqlOERowtOeV8FlOJcIyWbe05/zqyQOofnOf/6znNfkIkELWtB1FrCd9lpoRIV3UOqdU6IX
feRF+lnRaMYMox99JEU599CZKRSkJ8WgNw1H0pKi1KUZrebrbjjMl9Y0pSp1GksR4hSb9pReAfWa
RX061Esa82Pa5BhRlSo8oB5VqEuFqvRwCi5hRtWqcJyqsqp6Va4yL6uY2mpXxdqamD5Lp7Mca1qD
9NUwIZVCHVVrXKeST0uBdaByxatXy7r+p6fm1a/UdKaYzlqfvxZWqoFtmAlNali5em6xpdkoniLL
WMquRF8ZGqzvKrtZve7VOsJ8LGcLG6nQMgeTpRUtYy9LPkim1rUcdBtrQPta2k6UrSGl32Rru1tR
IrZzYeVtcIu6w8spVrjHZeptPbo15DY3ub7FymydO921erabNqRudn+q3GqeULfaBS8vuesx7IbX
vNWtyHddQ1cdnde924Vud6/7XvqSNb7uNG599Rtdo94UJTzdb4APC0zfsde0AkZwZ3OZ2YLQNMEC
duxAUfvg+opUhxTGMHyz+dYJZzjA9EmaWz08Yg0zsiMdJjGFLzQuBqfYxciSiJdQ/OL+DFPHwB2i
cY5XZWLy6tjHHMSlfVr8YyIvGGlFRnLs/AvgJDcZt0N2cpTBKGUqV9nKV8ZylrW8ZS532ctfBnOY
xTxmMpfZzGdGc5rVvGY2t9nNb4ZznOU8ZzrX2c53xnOe9bxnPvfZz38GdKAFPWhCF9rQh0Z0ohW9
aEY32tGPhnSkJT1pSlfa0pfGdKY1vWlOd9rTnwZ1qEU9alKX2tSnRnWqVb1qVrfa1a+GdaxlPWta
19rWt8Z1rnW9a1732te/BnawhT1sYhfb2MdGdrKVvWxmN9vZz4Z2tKU9bWpX29rXxna2tb1tbnfb
298Gd7jFPW5yl9vc50Z3utW9bnYit9vd74Z3vOU9b3rX2973xne+9b1vfvfb3/8GeMAFztmAAAAh
+QQACgAAACwAAAAAgALgAYfGcBnamRbWshzEvimjwkuUmWp/f4N+fot/foB+f355j3hqtXBYvHU6
u4YdrpgSqaINm6sCd7IBYLoAYckAg9gAptcAvdoCzuMG4OwY5eAz6uVC6vJJ6utZ7t5q4N55z+5+
xPx/0/1/5/6B9fyH/PaT/umd/t+o/tOw/sqn/rmg/qu05qHmsIjynXv2tnL30nf85XT683Xp9W/Y
/HLe/obi/pbb/qHT/qvl/tj+/v7+/v7+/v7+/v7+/v7+/v7+/v7+/v7+/v7+/v7+/v7+/v7+/v7+
/v7+/v7+/v7+/v7//v7+/v7+/v7+/v7+/v7+/v7+/v7+/v7////+/v7+/v7+/v7+/v7+/v7+/v7+
/v7+/v7////+/v7+/v7+/v7+/v7+/v7+/v7+/v7+/v7////+/v7+/v7+/v7+/v7+/v7+/v7+/v7+
/v7////+/v7+/v7+/v7+/v7+/v7+/v7+/v7+/v7////+/v7+/v7+/v7+/v7+/v7+/v7+/v7+/v7/
///+/v7+/v7+/v7+/v7+/v7+/v7+/v7+/v7////+/v7+/v7+/v7+/v7+/v7+/v7+/v7+/v7////+
/v7+/v7+/v7+/v7+/v7+/v7+/v7+/v7////+/v7+/v7+/v7+/v7+/v7+/v7+/v7+/v7////+/v7+
/v7+/v7+/v7+/v7+/v7+/v7+/v7////+/v7+/v7+/v7+/v7+/v7+/v7+/v7+/v7+/v7////+/v7+
/v7+/v7+/v7+/v7+/v7+/v7+/v7////+/v7+/v7+/v7+/v7+/v7+/v7+/v7+/v7////+/v7+/v7+
/v7+/v7+/v7+/v7+/v7+/v7+/v7////+/v7+/v7+/v7+/v7+/v7+/v7+/v7+/v7+/v7////+/v7+
/v7+/v7+/v7+/v7+/v7+/v7+/v7////+/v7+/v7+/v7+/v7+/v7+/v7+/v7+/v7+/v7+/v7////+
/v7+/v7+/v7+/v7+/v7+/v7+/v7+/v7+/v7+/v7////+/v7+/v7+/v7///8I/gDJCBxIsKDBgwgT
KlzIsKHDhxAjSpxIsaLFixgzatzIsaPHjyBDihxJsqTJkyhTqlzJsqXLlzBjypxJs6bNmzhz6tzJ
s6fPn0CDCh1KtKjRo0iTKl3KtKnTp1CjSp1KtarVq1izat3KtavXr2DDih1LtqzZs2jTql3Ltq3b
t3Djyp1Lt67du3jz6t3Lt6/fv4ADCx5MuLDhw4gTK17MuLHjx5AjS55MubLly5gza97MubPnz6BD
ix5NurTp06hTq17NurXr17Bjy55Nu7bt27hz697Nu7fv38CDCx9OvLjx48iTK1/OvLnz59CjS59O
vbr169iza9/Ovbv37+DD/osfT768+fPo06tfz769+/fw48ufT7++/fv48+vfz7+///8ABijggAQW
aOCBCCao4IIMNujggxBGKOGEFFZo4YUYZqjhhhx26OGHIIYo4ogklmjiiSimqOKKLLbo4oswxijj
jDTWaOONOOao44489ujjj0AGKeSQRBZp5JFIJqnkkkw26eSTUEYp5ZRUVmnllVhmqeWWXHbp5Zdg
hinmiwmMqWECaJZp5oRpqlkmmms+CGdBapIxZ5wI3kknQXriCSCaCNR5kKAC9emnfoYiROhAix5a
XwIIQNRooZM6yl6bElVKqaXvJfqQpoyCyml3mF4kKqOjkucpRaeimup3/qtOlGakn7b66nKlaqSn
rZveOl2sshoK7KC8+vrbsJICi+yexiKXa0bL9lprs8QF2lGarGZKK7W8YbtRoMUSG1G03Krm7Ubk
NpRuuOWOli5D53pU7LvtdhYvRuCWtC679Vp2r6nWprTttP2K9q+p/OoabsIFK0avQgevtG/DmD2L
UcQvTUyxZA9DzLBJ8368MV4dK1pySguPnJjFCIssccgqE3ayQRj/pHHMfOXL0cw1Lewyzl8Bei3P
N737M9BaER3q0TrdjPRakDJt58BWOf00WTVnmvVUPl8t1tbjSl0UvWJ7DZTSoZpltNlZgV0r2k5Z
zXbccMPNdaZz0y21/ttlyZ33UHXbnTTMfwcF7t5le9V14TzZzXdcazOOk+OJ90245DE9Dq/md70b
MOYvI+4Yu5WDPujn35b+ltGqmx644Haxbrq8gW8W+ewtD936XovjHrbYsA/mt+8m6767YMMTzzLC
raVMPJ/AB/9Y8oVzvpD1Bl8u+eu6Of839glJb3vvV4Mf/vHja420+cSKL1EEFVBAAWO3b0x5TAeI
EAJB8ssfQQSNIV+72Ecz90UkBAhEYAUWuEAABlCAviJgAXtiAQsskAIOHJ33XqUzdEnwIROYQEUq
UMH4SYBj2krV/VIiAQlMoIUinAj8MEgZ2fmpgxrBIUpCyMMTSqR//hjMIMc2GKYPQu8lE6BADxmS
PxE4UX8ktGD8LgNBLRmRUjODQAYwgIGJgAAE/QuhDyNSgQtIUYg1rGKVVpgRCzzAjQ+4QEQOAAKB
yO+FFbHABUyomfpR6Yp2ghsGtniBCzygIi1M5AjnZy/1TYmNHeHiIA1ZkTDikTY2ZNLyLALIgkgS
AxeAQCXDOEaM1LGPRDQS5Y4nyUNSBIzxUyJHQJBERlbMkUQCpA4V8oAMZAAjF/ClF79IhjuWEiMw
dGEfgyUkSDbkAXGEpkV6CU1XPuQA+wtJCJV4ycyQzUeAtJ4vCylNivgyA4a0ZkyAKEvOkA59Edpk
RcB3AS6OU50R/slABO7JkRBapJZKPKY330mjVWbEnhmwgEXOic6NJFOgECElaL5JJmdeBKH4lMgk
M1oRHooRkYmEqO2YuSK77VIjDzgBRkhQkAa4tAEd9agETvlDbnbzMxQ1UScNqFKLsHQgL30pRTx6
04gAsag4VSOH6nbSjvTSlymwSAkIooEOaECoQ/3oKO+4kAOMFJcbkier0FdNaDLgBhXx6kA6YFWs
SqSHLbSIMRUyVXeS7kwGRQlDDWmDgRBgAAOgCFs74FITZHWJIqmrZzLJprKR66lyvMheD+nVvwI2
sBNpwFVhagLDRoSoMwVJZ91FUjnl9SFlLWdFGKrOyw7grxIJ/qpLBWICxTYEtBxhwAIYQIYT9NRd
d22Q4B42WYz4UgMoGMgAZjADwBJgIhrY7GwFUoISqPW2WtUIA7a73d+WhqB5eh3DBnlP21oEBckV
yAxkcNmJsDW6050Jd7k7kOtmT1YF2unPyItOUZbABN6lCFoH0tznxkAig72qA2qiAhXsdrvUNe99
w/an02qEvPhEQVQtcoO+GuTAEWlrA0Z7EusqpMEqgDAZqmuu0uKnk4FcSYct4tXLEuC5ZAAxRUiM
Ec1q4CDVlfBBGgxhHqcmp49yrAEV4mHATuTGN36tQGKg44nU9iKyHUhnPduQ+arYNYztlHhLEscM
cLS+AgBs/poj4lrYDoTKUrVvRGQ7Yi4/xMu8lUgN5HxLsK7HoiIpZDrPTAbXDkAAEWHuZRXw4Yos
4NGPRrCIYToRFNP3ITSoQQ0mGlz0iDVY8BQIQ82ckOW6NtHM/WuV38znhkA60iF+bwMWXGkiM4DS
DVk1p/0MHhjzTJj5PKch/wvggqy3uU5mc7J1TZFHzwDSeX7IYONrEBOfOMXRXgicT9NpWCn5Z9V0
wC8hImxRDkTDAyaDogcAAGZDRNcBEIC8Ee3qBkMaveh1SFAdQOsIs5giAJA3QWCw7SMrlTq+Zto5
odnvh/jS3AaxQZMxm2N3O2TV8w5AAB6CYlgLxLcg9y0I/uQc3c06oLP/tggAABCAlQsEBrAB73WG
a7dRP4AEOOfIAdKc7ClbhMoHnnfGH/LsBUC35LPmiMY1vnKYI6QGIWh1UvGL8DGDxOYDwXmQhfwQ
1wr8zRa/uACoPO+HPHi3EtEAB+DbcIxkvOUIyfRqwswcQH9k4RA3iNQbcmieU/zNFwH6vAuukFej
PSIlb/tEYCACtb4dAB+mwWu6nZxwLnkgpAaJAGQg70MfJOwOgcHXySD3a0M7vSiBgeoLknHIFwT0
3D54bz7tYpQEc9wP0axDZMD5AQSA2TGQc7zpvZDhx5sgm05Ix41OBhSEnCROP8jKWQ522He1kbye
/bdb/pLa3Ae1IWneeMUXIoB4a5whQhf/QGrg4SE7ONsD8W1nR85mzh9E9dE3yNJbHoDVW0TTyWcv
lNc9NPcSxdUQdEYRYSd05acQDNiABXED6VYSl7VmL+d/DihvTPdzMSB5wJV9s5FwoYYQNodzJqh1
KUcGJbdZFUF4AxcDQ5cQYweDo2cQN0B/I9F3agZ0D5F+rocQ6vd6LkgaAxgbqzSCC8FaCnFdVSVi
gfd5MSB6AvCDCEFwGjiEKLF5nGeBC8F4jtd6CcFycDdlWGgadMca+pUT9kRoByFrJ2dnEqFrYyd6
v4d+UzgQpZcR4gZs5Ed2XHh/GDgQGkiFBbF/TZd//mBWewZHOyPoQkpkSwi0d2mXdGRwZS0ofGWX
hw8RgBbBb56oeANhA1B3AGTHboCIiBHxeA4hiXZFdaiRhiwBV1+UTRuRZdS1EekXWJy4ie1nTufE
bwKBbygggRNYaDVYcag4EaqYEABIi2ZoKzCGGPqFhAPBTnHVET72fdTFig7BgOLHfhMhgQfxAIO0
ECXnSycXYAZxaOxYcda3imD4eTTggc1zPXNCjZ2TcOskUR6xgi4FigyxACqQEH4IgWRQjBBxg9cF
TemkEOcIjORnaO/4EE5nfkHojiG4KPeCj3QBO9FIEfzoEbI2YhHxaroFhTRIhQhJEYLWkAkRXRkA
/pAFMQC8x3MXWRH4JxCGuHE8eBt14ikcCRcieBMSID/X+BHwdYtmZ3gIQYN1SBArmU8IRUkbUYp/
RxE5SRCPl4wHMV8JUV3cOESaEpRtQXNkqRAyNVNfhIMfkYKmB2kNoWmRRF4WIAIKsYe493RRJwMw
6HsWEYha+XYOgWe9dQJb5paoJC00M1DRc5YMYUkipRAuFEMQgZju52CHxxC7yBB8eBCSREn644wC
8YkQSRApQIys14NlRwZZiRA+OJhepo6LpZGK4i8WBhN2qRCQGREhFZlfGZb2xnwOAY4MkVp5aRAW
kHdkkECY94tv6Fv5dhEVmGaw51XzRojXhm3w/ieAlSIsafQRl/cQuambc/VZMgUSj6ZbwukQvUiC
98SGDZEBGvCLHjFvataF4ykRHfdlAugQuxIZ03gTToRdvokQRIVUGQFtmekQUUkQWIcQ5NhFCiGf
8xmTHsGXvUd8BgGYtcafqLQ4jskV+ngTJFQBJIFbHiGQu5WeEdGgoiZsZ+ZGcJSE6MgRNuBVgueX
BdGaFkGYBLF1JBCWwvMxb0I/24cTQfQ/J5pdHYFimHl345QQoFRIboQS4vhmW0gQUciVFIFn8mdk
kllLyPMz4RkWAaoTDHRBaNQRaQkS+wkShpSfBFFPn6lQJTGM+td5gJcR9mVpHtoQvVmgc/FB/mWq
OCPKE1GkpiKBokdXeAsaEQ4wnwshmgTxSRaUQMypEXvYWwfhdQNQhhKRggxga9v5mHeEoB2pNIXa
FWYZog5BpRWwpmx6nrHlAP/4YwmBepD6ie5JqQPxmfDZibzaqX53lRVhmbY2EUellrFDNLSnF2c6
FHrER4sKV5m1bwohm/EZk55oENVUAcdZEHYaEujYrQaxeZ1nrA6Bq5UIhxuxrGSwlnKhqq7KNQV4
FEkaAbYUEspEEf4ok9rKmTDJrQWxcKqlEhRargRxo2TAl315kwwhW2DaEf0jqGlBr4dhlkqRpjSk
E1XFdgkRsAwxsIr3oCxBsv02gTWpod73/o8j0aZC6ayruhWHqhQlFD+yehB0NBBFua+iZQJIl60V
kXglq4QiEXUvCZO0dpq1+K8FIaQOcVSUyRYYWxhD6RR6ZEEUYLECsZYPBRLV5Vn/aKsfoVKlWbDj
pJwesT/hShDAGJ0b0YQsOBBBxhHLSlNGtUBUYUQzOzjg2bcmobU5qxBgxE1HqREpmIAcEZ2dWbAP
4KtOZQEYoEfuyan96IR16xEA9ULyGlH/o6RQQa/1Grr3qhYAFVA6ZxD+iGsZMWD8RrAJAbkbEUdm
dLCjKW4PIJMNEbCRqmCWabdbOxDEFLUX5D9040FWq7FuAa8i8bFzCxHD93dXSgakqbsj/iFJhIRP
vlRWFcG7pLkTiYqzS0GogHsVygsXIfmzSGe961iBgXUA7Tlq7Euu9jS5BiG/3YsQvRtdZ8ub/jQS
0zpFSVG1Q6pkcUFHdfRQU8sRPEZtqpmuCIGyLgGsqluhDhCsIZu0/Du/B/G1IlGiHTs2BBwYVzsX
X7SbEnFpQKYRGMpzEWzBIvFU42oQITBIHCWf22sRAUu0MSVGXAuSsfo/PmszR/ORY+GRo0sUzAsR
XlZtXBcRVOaw4XcQzlejGoFNmCoCFQRHZya7AtFLHJwQApm0YWwQB/rDEyFFDSQUIwwYJZwXSwyb
TVxfGqFjK2uDujoSB2gQIlBPIeFl/uvZT7T6ESRkRmvsE3ybxE2BOgpTvlFRsQ8BYCcwqtpZqjgJ
mH23sNNbEthLld6qR3H0ESZpyRgxyCAhuVrrE4w8T0aMNUXsyF9xAFu3ZQNBySp8ETyqXGqGaAew
mdN0TgvRyWpLBi1ZpddXksFJyhcxmTAEwBY0uDJBvg5jJxejyGaRrBnBpQzoeU7FcNa7hgiBvZMb
rC56mSz6EYz6WUN8EHJaNGQKyzSrmG8DGnM8ESKQy6znh+oqWUa7WpbKoBFhbwyQOOnsEDCEqgTR
zjQhs9PDJ/MsGj7aEOZHBmEJdDS4zxMhfzicwwKBTQfhx1LKRZ68EO3JELr1pwgh/svmyUMTAbMI
odAw8azqYs1YQSiiAs9zQckPpswEsXTU14VOx5d/KBHEiG+YR7IFgalfDEpsuEXDzIy+3JX1vBC/
mxCIZVSnisYZI7qTQZvtExpbBnJk4KeMxhAWeX5VyKEQQZP0FgI24KI4TGgh0MdmJKMeEdUFYXg8
/aNPrBFrWbjluRNog9NHLC5Y9BmyHLaXidIHkX43ic8SMZ1Q2xCfNNJpVRAeeIwDsXx7XRBcpnsb
sbN2lL7u7EE0rTjnc9qDsaWvOXAaoYP32RCbqhCdjMEMsclkoHEaaM6P2hCGZauUiM4Btc6Z08b+
0j6EfRg9KRAxyJpqTRFa2HkQ/uutnsiG2JucdMxhgdncBCHQFCFbZQxC1tozTJPcaCEo8aLafLHc
BCGG5zfZDGHRfYnRDvqL8CnSaAQCuP0QveiNGWFeK3hVH2GNM5HI6v018pw2saFp86gQTOdydVxw
Qq2jBSGMhom/HFbScZl8BTndoapYq+sRgI26MV3eB+7KN+0a2ITXPa2BG/iXap3Jy8l+qFmwA2vb
JE0Rm0ZwKUkQ8F0Q/+a0GhECw0vaKMPVROifJ84XUuji2NkQ+Mel7ChvYRnXT61nLJ4Qkrear3cR
LBapwY0RHs0/xA0yJr6I6pIbThePB2GRGwp+fseyKSGXuc3lCaHbBqmlXl69/hBRZpE1OUg+dzNN
G0CXf+Xn4TvZ0fcMfkI9xS9BA28n56yXflBoESvYvyqNEBVUTaWNvDHnn7DB3hCxjBdn0b3n4TpX
4+dK6Q7Y5B4+kRW8wUB2giZ4e+hkzNF85hk56Koxj7De2GyuEKpnxzHAXpI+EjO2ozSY51AohagO
qg7Jww6xReQVSsX9ylQTgqBeGiue5VAues7+5AMB2YU2EQcgyb7VlXCZEO1JZc7ehVFYg1K3bZZF
3wKReBBBpzZc4juz5HyBLP7uFwU3iGnNpRwBcvkW0QdB52Qwh8wugzcpAu5GA/UuZR9hTzOsEkbU
VLhxKgGfF6Iuhj897gY//hIooNeaWQNbbucKiBDOFWUh8VQsMdgf78YeX/NzQQPMZoiulz8l7xC9
SxGc3XUZJzK6tlzI5mbmzkvcexIGfhytgvNwQY+rfujiXhH7xroOMfTdmH7QnmurdmyvVdYUAaQ/
Rczj5JIjQfO4cvOwAYAJ0eTld/XfbYsB/X7vtuzi9+ufRxCmpvQaYYKjZtm60+/P4fGvwYprTvAa
0Vkh/rQhl+4FoZ4nWep9+YN832g6q+H8vHAhQfNSvxgAH/pv4e5aOYZSlbnvpWC7K4yj/G67raVf
r21WmWxvvZJP1bYTmraMaPjVEfWELscOkblU5YQSoaLnXMcY4VztOBAp/qCrqYXjAyH9St7vpA+g
bu8aop4QU53SCfFSwK2fyUwR857b7bXWhibnzldbwkb4KBE1vs8dwM8aVN9l3Q8RigsRAomZnd2U
zMaOADFAwAAyBQ0eRFhwhowBDQUkPJhBosQHEC1exIgxQYKMHRFu5OhR5EiSJU2eRJlS5UqWBUN2
fNlS5kyaNW2SCVGjRkkGKlQwAMogZQeiGho0QLlggQSWMRI2hPqQ5IwYMxpmnJjhQsWbGmOy3NhV
7FiyZc2q/HoRwVm2bd1ePICyp4oOQJGSNJHXBNEORu+mLFFipdODA6xCNXmYzAEbGCdyZYsgbUqQ
by1fxpwZ5uSEYTV//gbt1oTPn0JH5kVYtIEDloEHEyYjQ8ZhqSpt3LgI2axkzic9hwYeXHjN3h+H
H0d+0kTB0qYzBhZs8W/LEstVxiA8uyGAxSxvpMj8G6z45OXNn3dZ3CB59O2DuyYTNGjGuKILNtCg
ASVhgQYbt0QBhYMemEisymRizz0FF9RMvfUYhBAz+OJbQL7jTDgqQ5RoGOiqgm7AraUTlnugRBNt
SpAyByNksUWaViQjRRdnbOkAEg4ibb7hMtTwJAKiIsgg8GQqYaILtprpwJaUpLFJJ5eEEcYnpxQp
RwYUsGkCkw6YML/8jmLNJKgQMyjAmTDA4DEoX5SSSjfffNAjGeGk/jOhE8hQoULnZJJAggn6NAk+
DVSbbqrDPCzoAQu0uoAlidK8AAK05iyJyTovxTQ9kdrMlEbUxAKhT1GZClQw1cJMrKqGAuiODAte
LdGClR7NQLdKOc2I0k53nTJKXjGNTqwJhiWWVJPy4rFQQ/sjo7ELHj3SVrcsnRTXX69lUFdNsZ1y
QmGJ/dPYk5JVNqUbMkATUmnP0nakdrmFl0Vf46WRy4wmoIAClsAV16QGiOLxoPrMTTcDWad9dzNr
6WUYPW0TbnjBUfs9adg+tURpUICPOihYlAJEE0m2IM514YhPNm8tOVF+EtxwVeKXYpL44rhjEdui
VkWTWeb5uId3/u4ZNHzztTglEFyWeeYOlL2RJevKItmroKduUkqgqcYsXwqGXQnpmyRi6YFnF+0q
Z5TMxjpt99qNWu3LtOYaZn5rKrHWdUd6Fda7J2XTbb9bnPfv8kb9s+uiazpS75SyMnjvW69eLwGV
Bad8wZ8rP87r455NUyvHMyrY4PEgjxxz07Pd9HTgtN466c8uQFMikU9CN/bPYWKTdNV3Nytw3t+G
23WaQBh4pIJvBz1N5C9qG6Lmf4ce5011j54kooVPSYJ8DQIBBJQgbfD5j6ivvnwU3TW/Laa8r+ni
i9k/iUCtMBN//PTv99l3/McivqatLcYeRixgIkUhTHdo218C/i+jPwWeh3UUCOBF0hUtdtXvIBZs
YAYRtCIManAsrCvc92KHgYONpYMxOqEHVUiZ1K3QJhWowEpYBygy9I8kBZsdik6YQhf28FYt9OFK
IhCBClCAiCrRXri6B78bpqmExKEeAoM4RRNOj4ooYd0Q5QZAlQxQh1Ek3xXFKCcGjhEjMERjBEKw
RhG0UQTFu4jLQggaKT7OjHeU3srwmBELXCCNKiHa4TQjGSju0ZDsAuIhEdJHCxQxAoD8XwShljtF
VpIsl7OkQdKoL7lJ0kCS22AYMznKOOnRklmMACchVEd3iZKUr9wW7iyJxiIacZUH5CEsdVnKklWy
Ao2spRrX/jhMOAaHlejbZTLLVkYzvsqRawOjK5U5zShJ83cwVGV5NjK5NU3TmwZK5Dctc8zpWVOc
3qzmORFWSHW283zhdKcOKRlPeiaJmfVUUd/wuU8EWZGfZ+sgOf85UObdk6CdwaU5D9rOdC7UeQFV
qEPdyc1cSTQ95IuoRd3JNoemUKAaBWln/MnPj5YsoyGlJyFNWU+MUhSlLz3bSNVZ0oK6FKY3NQlH
xUnTguLUp0uCJyx3mMuforShr+TpQ09aVInq1JKSwyhTpVoTmz5UkR5V6VS1Oh5k4hGjS92qUYMa
xKQiFKxhfelRfVhWhKLVrfJcqQqHeta3+hRGWW3gNu1J/te6FtWp+GOr/fo62CrGNXqBFSxhFVs2
mf4ujERdbGRj1FXVIdYgvJFsZhk7Vr/NVbOfXWZj1aZXe4LWtODkLMsse9HTtnazhlXtV10729DC
tmEe5SttI2tQbOFWt79F7WYYtloU5ha4mf0rr0i7waoe17kzaa5xlCvb51a3sMLFlGetu93gyvJN
xJ0sd8Xb3YpSCbfGHe9s2YbeJOEVLO5Nb3zfadv2gBey8sWvS1qZra+yN7/HfZd/RVut/xa4d5TN
X1QNvOBJDvgz52VwhC/JWwO+CL4SxvB8yxse32bYwxMmI/2gKOAPx9dqFX5RiVV84NTudcQrhjGI
Q1xb/hfH2MaXRPDoqEriGy/4xN2scY+FLOOOXNhd0fUNj4eM4R+TxL5KXnKGm2zSF0fZyiNTq/N2
DOUrq3jKkUPyD7s85rc0+clkRnOZq9nfNLe5zC0Ws5vlnMcNE3jOd8aZena2XDz3eWQaYaGfBT0t
5uX0voNGdGKlS0YuJ5rMkwkzCh096Tcv2iKHpnSmO8NNzoBX05/2blowDWpSS/clmC11qrEMkkar
WtCtdnWsZT1rWtfa1rfGda51vWte99rXvwZ2sIU9bGIX29jHRnaylb1sZjfb2c+GdrSlPW1qV9va
18Z2trW9bW5329vfBne4xT1ucpfb3OdGd7rVvW52orfb3e+Gd7zlPW9619ve98Z3vvW9b37329//
BnjABT5wghfc4AdHeMIVvnCGN9zhD4d4xCU+cYpX3OIXx3jGNb5xjnfc4x8HechFPnKSl9zkJ0d5
ylW+cpa33OUvh3nMZT5zmtfc5jfHec51vnOe99znPwd60IU+dKIX3ehHR3rSlb50pjfd6U+HetSl
PnWqV93qV8d61rW+da533etfl3dAAAAh+QQACgAAACwAAAAAgALgAYfGcBnamRbWshzEvimjwkuU
mWp/f4N+fot/foB+f355j3hqtXBYvHU6u4YdrpgSqaINm6sCd7IBYLoAYckAg9gAptcAvdoCzuMG
4OwY5eAz6uVC6vJJ6utZ7t5q4N55z+5+xPx/0/1/5/6B9fyH/PaT/umd/t+o/tOw/sqn/rmg/qu0
5qHmsIjynXv2tnL30nf85XT683Xp9W/Y/HLe/obi/pbb/qHT/qvl/tj+/v7+/v7+/v7+/v7+/v7+
/v7+/v7+/v7+/v7+/v7+/v7+/v7+/v7+/v7+/v7+/v7+/v7//v7+/v7+/v7+/v7+/v7+/v7+/v7+
/v7////+/v7+/v7+/v7+/v7+/v7+/v7+/v7+/v7////+/v7+/v7+/v7+/v7+/v7+/v7+/v7+/v7/
///+/v7+/v7+/v7+/v7+/v7+/v7+/v7+/v7////+/v7+/v7+/v7+/v7+/v7+/v7+/v7+/v7////+
/v7+/v7+/v7+/v7+/v7+/v7+/v7+/v7////+/v7+/v7+/v7+/v7+/v7+/v7+/v7+/v7////+/v7+
/v7+/v7+/v7+/v7+/v7+/v7+/v7////+/v7+/v7+/v7+/v7+/v7+/v7+/v7+/v7////+/v7+/v7+
/v7+/v7+/v7+/v7+/v7+/v7////+/v7+/v7+/v7+/v7+/v7+/v7+/v7+/v7////+/v7+/v7+/v7+
/v7+/v7+/v7+/v7+/v7+/v7////+/v7+/v7+/v7+/v7+/v7+/v7+/v7+/v7////+/v7+/v7+/v7+
/v7+/v7+/v7+/v7+/v7////+/v7+/v7+/v7+/v7+/v7+/v7+/v7+/v7+/v7////+/v7+/v7+/v7+
/v7+/v7+/v7+/v7+/v7+/v7////+/v7+/v7+/v7+/v7+/v7+/v7+/v7+/v7////+/v7+/v7+/v7+
/v7+/v7+/v7+/v7+/v7+/v7+/v7////+/v7+/v7+/v7+/v7+/v7+/v7+/v7+/v7+/v7+/v7////+
/v7+/v7+/v7///8I/gDJCBxIsKDBgwgTKlzIsKHDhxAjSpxIsaLFixgzatzIsaPHjyBDihxJsqTJ
kyhTqlzJsqXLlzBjypxJs6bNmzhz6tzJs6fPn0CDCh1KtKjRo0iTKl3KtKnTp1CjSp1KtarVq1iz
at3KtavXr2DDih1LtqzZs2jTql3Ltq3bt3Djyp1Lt67du3jz6t3Lt6/fv4ADCx5MuLDhw4gTK17M
uLHjx5AjS55MubLly5gza97MubPnz6BDix5NurTp06hTq17NurXr17Bjy55Nu7bt27hz697Nu7fv
38CDCx9OvLjx48iTK1/OvLnz59CjS59Ovbr169iza9/Ovbv37+DD/osfT768+fPo06tfz769+/fw
48ufT7++/fv48+vfz7+///8ABijggAQWaOCBCCao4IIMNujggxBGKOGEFFZo4YUYZqjhhhx26OGH
IIYo4ogklmjiiSimqOKKLLbo4oswxijjjDTWaOONOOao44489ujjj0AGKeSQRBZp5JFIJqnkkkw2
6eSTUEYp5ZRUVmnllVhmqeWWXHbp5ZdghinmiwmMqWECaJZp5oRpqlkmmms+CGdBapIxZ5wI3kkn
QXriCSCaCNR5kKAC9emnfoYiROhAix5aXwIIQNRooZM6yl6bElVKqaXvJfqQpoyCyml3mF4kKqOj
kucpRaeimup3/qtOlGakn7b66nKlaqSnrZveOl2sshoK7KC8+vrbsJICi+yexiKXa0bL9lprs8QF
2lGarGZKK7W8YbtRoMUSG1G03Krm7UbkNpRuuOWOli5D53pU7LvtdhYvRuCWtC679Vp2r6nWprTt
tP2K9q+p/OoabsIFK0avQgevtG/DmD2LUcQvTUyxZA9DzLBJ8368MV4dK1pySguPnJjFCIssccgq
E3ayQRj/pHHMfOXL0cw1Lewyzl8Bei3PN737M9BaER3q0TrdjPRakDJt58BWOf00WTVnmvVUPl8t
1tbjSl0UvWJ7DZTSoZpltNlZgV0r2k5ZzXbccMPNdaZz0y21/ttlyZ33UHXbnTTMfwcF7t5le9V1
4TzZzXdcazOOk+OJ90245DE9Dq/md70bMOYvI+4Yu5WDPujn35b+ltGqmx644Haxbrq8gW8W+ewt
D936XovjHrbYsA/mt+8m6767YMMTzzLCraVMPJ/AB/9Y8oVzvpD1Bl8u+eu6Of839glJb3vvV4Mf
/vHja420+cSKP1EEFVBQwWK3b0x5TAeIEEJBFPQfQQQUYAz52sU+mrkvIiFIoAIrwMD4RaAxsuNW
AQ3oEwtYgIEUeODovPcqnaFrgg+ZgAgrYoELXDCAkVkY1Q51P5VI4IUvrAgGNZjCAZrJgxrBYUpE
yEOK9M9//jSsId7MBELoYSQDFplA/3q4kPyJ4In6C0EFLsjAIHJMfV8qIqVm9oALXOABGJAICMa4
xAlIgCIlPKEVOWZDK7UwI170ogUeEJEDgGAgFGDiRCwYvzNWjINU0qKd4JYBDGCgkBZIohljSJH4
2QuLUnpjRwxpyC9W5If98+NsIsik5VlEkAahpAUgcElMahIjd9RM/Y5EOfRh4AIWAQEmzbiRMXKm
jT8SpA4T8gALYMCXF7lABjJAx4iM8Y4/PCVGJKBECaCwYsESkiQbIsc5WuQBxHyANiFygP2JhIeM
zAzZfCRI61HylcWcyDDXmc6YKPGHtLRdNG/kyYqY75yJ/qxIBiIwTEtqhJkTSOIsPUM29DWolRkx
ZAb8qc9hPoCUGXnhIi0CT2Wmb4guAiXcDonEi5BgmANpQAc0oEgRhlMizqTASQk6TxXZbZcbOQFG
SECQBtjUphThIThTKZE8mtSityQdijSqukLK1CI0FchNb1oRnQa0lEsEqr1wyaG6wZQj2jThA1Jg
kRIMpANg1QBOcwpOilZUIQeQJyQ3VE9WoS+OX2zADQQygLpycyAaCOtYJwJOZkI1ngjxalBldSaE
ooSSC32ADchAgAE0dgAUAatNTWACspbVIlIdiGAJStWDli1a2CRmQhV6AVIegACoTe1EltoAMlBW
Ik6V/gBPO/Jag7XUQUTllTZ3206KIDadM5iBYxsrEda2ViAm2GxDdJpZjJzgqO4Sqmc/Qq91OlQj
F3AACgYS3BmgVgHFHalYjyuQEpQgrQ4xaUcYwF4GkAG6pSGdQcNTTvBZl5gkUK5FULBdMnS3sTQI
70j3KpP2tpcg6I0uYQlE1IxY96HlNQF8KTLXgRBgIDGQiF7JK5MFeHgB7NWsfrO3Vv7kliPrhChB
UMBVi9xgsQtQLRkyHJGx1tYk502ICnYMYveSwbzmuu19QDnIlbzYIqdNLWoFQmOK3PgiGiDpQcw7
4oLsWAUgbu2TUTPOIX9WfB1NiA3q6liJKHnJTG7y/kSSaxHWEoSylXUIA3r8XthwEj71dV8XGXqQ
1JI5IsFVckFioGaJLMC7q2UtnCNi4BBPpAYJVqWQ1TNNkcRxjr0lCJn/DJH/2tUghX7Ihz1c4w1z
GCIMwPKBIUKDGtQANF1GT1uDNd9CHhIDD6iyf4XL6U5798KhnnGkGxJjAnxYwwM+NUSuTOeHBJuz
JQYPkWcG0ogg1pIloCx8ByAD4QL4IsEWgLgfQgAV/HoByO4AgQ2SYx2rGrwNITSXFyztL7uMt2F2
iEJHWRAWV5jMBWAyuAsSgIIX3CHlVgFqF8Dfhjfkpg5wALup3BD2igoG8jZXZ38lOKWxc5sRWega
/gdig8X2OuMUabK4Vx6Ah+zY2PAeyHNn/lwQRDrKNo04nIFsEQAYnCAwsPOkOU5dQj6YBEhPakY2
LYALY9gihI7BysXdcoeMGt0RiTLOJb4RAHjd6zAIe0JqEIJhhybW0slz4u7bTqRTWdcN2fSnMfzs
hwiA0CsX9aglogEObH0jBi84ABTS6tXcuTmV/gg7VXwQsztkALyeO0Hq7hABwEAALY/6Qg49g71n
XaxcvwgMRHCAAFA9AIM/SAwC7Brp4op7JxEtSLgd+WCHWwANAUDeB1J4d3/Y4SkJe9AFYnrMo171
sjm8cGY9dJIIM98Pj3JDgvtp2ye44FRfSOAP/k6QVyNkx53HOhlQQHOSDJ/gmE893SnfEMf7q/m7
6fgBD8LbTCcE4sqON+Wnzn2ETB3zBlEDi3UQx4YQz0VZNrcRwocQXod6LbeAFuFq3jdV9NYt8ucS
6+RF9ncQDoBzTDURdfd/Ved/l5d9B3EDFVYSm1YQEJgQgQcA55dyq0caykcb0zZ/ClFI7JR0PJhf
PEcGWjdeoScRKDd5UmeC/od34lZ3N5CAIsF0AxB17Ed8LHd8IFiE8VWBmxQ9OMgQwnRIfNZ4X5Vs
cVYRoXZ3lxcA7MdyadYSK1dXuNcQo1d6VagQpjeCaTaFZ7dxp9FgN6FQG4gQWtcAD7RlERFu/lWn
hwXRexgRWtCHEDJwhAMQhwnRgmTAcupnEF/ndWRgia0Hf/HFhS70QwSRQO5XY0uFXHAXb9d3h6ZH
Boz4EBNYEbzlAIFIBjZQAwuQADIgeSwodgcheC74gjHYRKaBdseYeCUBQxI1Rt6kEcalWRohggIx
i7I4gBRhXRE3EA2HAiiYguIGWaAWA8UoEcUnjAshgc+YjG/Th4bFEvAEWBwRhA0whO3GEE53ENRY
jdgIEShoEI6YgxqwTg6gbQohACeHhRURAAhAdZk4aDTAes1zPXMyX3rBfKB4ErPUXBWRVx5oaJ7H
guSIhGSQghLRhOi1W9uYEFHmUIyHEFCo/pCi55CqJ5OsISx9YpGdkzhE5kNn5REeOVllaHVXdxAl
qIYFYZINNUwriRDsFHdMxxEL6HM/l4e4USeeopNzcYNauRBRJRL1KI0PEWgFaBAjWGhKqU4DeV0a
MQPdBocZYYnECIwLMWfiF1j3OD6a0pWrY285wVyydUxO+BE/uBDgV5YK4WrzuJYPMAIiwEvrxBA1
wAC8WFcxRxF0ORDFZ3wPmRCNJnMnsHOrWBkVWSl8CTXv+JdlJFsopUcOUZjuhmV3mY4PEXEZ4ACP
iFe3WUxRVBAqaYsHkQLfSFe+uBCUKBCeqJl1KGeNRn40uCiTcppncWIz8ZgJsZGwxYxP/vUQeZkQ
IdkQAtgQETeeEqFAAvFgDpBtEnYC/HURCPlnNkkQDZl+LiebjraHpgmdlHGBNWGdCvGTEBFbH3F1
s8kQ/ciB2jiEEnFfCrp0ZIaQDDF6lygAnakQzHaf0KYugiKdYUGd/emf/ymPIcRcA1qU/rgQGdCS
t9mgAhGQCZGijNkRkxiOk6gQmSkRV4aheolFHNoVN4gTFGABIAoSTgUSh0lqEZGWBaF1t4kQ9XeL
BNkRNnAAkfieeDgQySkRjeZjBPF2JHCKh3EybyJAfokTAFQB8DMSAGVG28kRM8BjC3CZGzGQDjAC
TpmBt/gR/0gGVeqL5FiOFbGlM7do/stFioFBNF3Yoal5Ew3kPyMBmEY6Ax1QoB0xpANxX0JqEt5Y
EOE4aBqRYDmqo+nFjH8BQomqOD/aE1NERRn0TSRKEQ0gVlKGEP01EbgJnAmxjgRhXaUVRQqkqxox
YQLxnpCleRnxg6HKpSGEnRepNKfqo/bWow5RAV5URY/6qsUFcQpRqxERcdqEqwTRgQv1omwJErbp
AMJKBmRGABCqEbBJBjsmqg2BSXkUmLGDqD2pNosKFHKEpiRxWRMxiGFpgNmojQUxng5QASx6EgjL
onJ3nBVhiBphSgJxTHLhrNJKFalqFPCDpiPnESsFEbE6iAubrg6hok1KECralCrB/qAFMaVu+aCr
JX2uNZQdkVIiChcYG6ZlihQYlEEfOxMm0Hc4lxAm2xAwSkwvyaQsmxIpGqUDUWFuyWsVuhCKdq0/
BTn4mrFSsbFKMUUz5BB2RBBKRBKvhXOZdbQMcQJreRBMCksjUXYI0YFryXXCqWnF6RDRWBBgGhHv
9JUyhBU7Wxhc+RQlFLYOYbEA5VceYV5xtrccobZAqAEOkE8iAay7el3tOY/iRWAUtxEbOVsPcab9
wzWDKzM9a7gXYK3GBKkcAZsCm38V0Z4uihCYW6m4WW1G6xFgNWAS97kdcVYWCxGYFLRIgbFcCxVe
OxWtOhH0GrIV4XgeOV4TMaNJ/tmi9ZerJPEAtuitADlMNhsRR5tsPzaaF9FMBGFLDiE/jWq8RHG6
yCN/yZsTzCoSRAt6EvGg4rinZPBgeToS6OmbvGURJhtx9di0NxGkrOq+Z7O1hJu6bwGgH3G2YlW9
cncAB8p2GLiWKSsQz+dQ/7u7brt1CxtCJZFG/poU8Huo/PkWdpRKKQW9GSGxEjF1dXWl/cvBIRwS
Kgphl+q/FWGy9FjCDCFRIyQSEaBGR1FEz9o28lsXx7SaHIkQcyav5mt3MSAD73kQbFuuIFG7BREC
dWsQD0bAguh3lEvEC9FXbeoRP/s/73s0+ToWsNPETkGvOcsQW9qlV8wQmicA/lo8ADjsnB3RTb/6
mNzLvQhMBrd7ni65XywZZWqsEE6Vxxqxqg3EwDaxwqX6xHwxUIzmYQY2EH3rbAUBlwRxA9w6EiKQ
oAdhqSVKqRlRyVNsEf2awj3BxPPbFKijMHbMvIDLEOt5AqmmavKKmTcajuOGi/xrEk/LlE4amQPa
XrKMEdgKEiisyTHRy/Y0x1gjx7+MFVJ1AG9HqAMRqnF5owMhdwNgjQ6mu4JYt/b3m3laygZBoCCx
powbEvKjzS5hqrvctXZyMQF9FsaMEYC6zoAcjjjciAOsEGN8EAG8EEqqEAsApyD2EQI6ESnFELDc
Mz/jzWnhJvJV0Gexxw/x/ooikKVGKHU33BFst8N3CrUUDREXLZvVXFIACxESJcMD8dEyga/Twyft
OBpXp6wK0YBWuBDy1qcQG8ShWQIxTQbdpJaPbKARAaenQs5+e80OsaYThRBA/c8AnULM4jGlwV/M
ltEN8YJVi5zFKMgPUaNRi4LA98Ne/KsDAcYFQdOS6c6eaZc5zcddbclrHI+1nDnIOxn62T6hAWcz
JxAXKqcJUYUVytJ2R2YhYAMVjdcbGAJP9KQdAdj3PGpIrRDv2hGCOUttPDlME87TKS5b9Bnk7Li+
d9oIUYKcCXTqbMFwKI4aAcQXMWwS6Z0YjdsJEb4bMbZ4FMyu/UEm7aPn/hPdgvGnQWfZWMoRb0jX
DBFaKFrGF9HMMzasT00GN42YDhFndCu7y5S1RcPJpNk+sL0YxkoQrtiJvW2GMhDI3K0Q2UuuV23P
CqGU2Id9BnGha7ZUi4wRUgzSO0PdYLGhu4Ib9V0Qm8iJG/HHWYyQDd3XHxeI4F2x4v0QB7qPBSHK
r2kQsesRf1uvQb3YLFVksg0brhaR2veCGVHhEyrX/dZwoWkCU01hB+oQiknebIgRhUmP7E0RZCTB
LIE28621ogLhcNFNpB2Mp/fWcpjfxBoCAjic3/uUFzHkRJ5mR07VXbVZ9zuwGBEC6uvkKAPj7uIQ
UZ4YwofdCHGHBiF8/glNnL+NtFd9EUUeEQGGhgA4eRfBc1o3yWILrD5NElBO5WqxLJKeFzFIkwzo
cxiOnJVHo8Dd3aN95QmRYXf41IqYEObVsLPqEBfwSjmhy5XOFqdS54ERdeW46WaJ4/nT54O20Fvs
EjRA6rtnh65o6qc+tw2LYKtoQZi2ya8d66tD57Ch4xDBf0vN1PJ2d4Hc4RxxAGCuj8tZ2fyHEMeu
4kHYoCXQg0n3fK8UhmT94DY469COFhFZ7ntu7RGKcZyKkOUtEkdmECZOgmc+jhRx7ox+nufk7iqh
yyuUfNJeGlYu6g4BjJhYiflNEQcwzEd70dU85JY38DV5lALhfkWI/mYQvegHLxCIZblP/uwWqC6/
gYWBt+cXH7nPtbnmLcrVPOidqIRazmRpSBAi8GytNlwmrxALrhCUVFotfzRXdZUwrxvUjnqbiKW8
PhL8ddTpWAOsB/IuSO4JcWb56BHevfAuv3zyfhvBPowGBwC7rhHrPRHnjeJ+TAbFJzLPRgC/dvR3
5d8PrS9yThytMu9xUdzgvtsbAbn1aZ92x3J3B26h9l98DxFeqnRk8MFfJNPdDO/KgSy0zhcSaPG6
TfWLmYo4yvidzob2DmoFIfmUXRE8aGv9pPm/w/mIF/Wt0beXTp8zTFnTu24HQHPPdRCCDREYd+Sr
76kEkVoYDBLW/sXytg8tnz9Ym2MbhHb1FPF2Y0i+C8Ge3Zjz6H2QPr9+UIdyxMXMFQ0B0vwQHKXw
nxTp1jH4tHHqVdwQwFsQeiX3+Jz6YH8RNFBXAEGAwAAyBcmkQGGw4AOGDC0ohBhR4kSKFBMkqJhR
4kWMGj1+BBlS5EiSJU2eRBnxoseVKV2+hBlTJsgYNUEywIkz44GMDXz6HKlC6AKiJHlKjJFS4FKC
ClGcMFGiRAaqFyw8mAkyAYKOL1tmBRtW7FiyJLtmPFtW7Vq2IGmIzBnXZAMNGn42ELlgaFGSNiPG
oDFAMIGRA2YMENh0YgYMVDNgbUvmq0uOkS1fxpwZYlqLmj1//nYZokaNkXpVLMhZ0kQH1h1+BlWR
YAHKpBEHCkYscsZuxIolYgCe4QLktZNTGgedXPnykZwnImAeXXrBoyQZDNUZ0sR2E2QatAZqUirt
iLgT695NIAHhisGJl+UKs/J0+vWnI9/o3P5++iZOYGcApO0iYs2ulMY7ya+CeOutMIEKsuGGiq5S
iyv9zLqQPw03LO6jDDkE0bLuyIgrO4qkKkGtEkY0ya8ZZDiMAAWqM+mGFDLDr6T5QuSxR7Fy3OxD
H4eMCUEyiJKLIhrVYjHBBWcYiAwbXkIhIYUeYCwDsHY8TkgivwTTQzHDJPMlI687DbUAl9vurpLe
IuPBgm6Q/tAlqBZ6wIKrLpAJSAzLBDRQljz0UlBDqSMBIqFOM1G5u8JzcCmFbjSzBOAusOq9k7hE
idNDPxXUT4UKBfXT/4RqFLMDjCSjLrsgFWkpSQuqMibgGsNA0z/lI7VUX3ssVNRfBT1hLAkmmECC
kYzUoIO6YA1JVjkXAu6lW4XTVSthte11WG853Fayb0sdMCwQJEA3XZLG04ADZxtwoKT0ljqKoeGy
Henah3b1qttx/9UwWIANTXEsZA9WlqQBn8VL3nkVmJIMTDFl6KXhmguXpYwH5ni/cDfumD5WwzoY
2YRLerRhkqBkj4wbLrj2YstARsvfkG++b0yceVy1omMp/kAWpZLRPSllhZYc6YZbMbgAgrY8NQnq
nacG10uaqa7PZKKFNnmCk1p7VaGCTULhVpnVutoim7FmWznoBm17yAkoANpkrpM91qTWXFOZjLFP
ghnfmaTGcO24D/ds27QR14xuuu0uCYSSIS8JvHgNSjSlJn80PD/GPweR1M5Bj8xxCk4uafJkUYKW
jMxRglnLLRdXiXbSb3862NFxJ8vxoO9ePaYHLqAqpTyH2zcm24PkvXn+BHY+OoSDP+lgmRpqCPCJ
Kex3d4Muejt68e+z2vvxX/Kd+uUco1hwjRhrLAPuo15+VPPPx39LnfO/zHT1lYMfVeaXr+DIr1PK
qx///hQ4uP0tcC3+Q525kJYRqsTPfR4JztkwxisHdnA5uvPgA4EWwZfMTSEgAAFJgmMBp6GEKi0U
CeE2GEIafkZ0NVRLCmXys2Oh8CQMeV1kEliQIeLQiDqC3hHBAoIJmmRoEtAhSRiCLSEOUYZKxOJY
kpjF6ZhuhCaxip4qVpYrxvB+XERjSBR3xjTCxH9eK4kFHEOVC1LmjGVsYx771EA9mqQCFUiJ707G
RJHErI70uyMb+7hItfGRkSCJAN0iAMiT0A1dE0BhFEGirwhkpYh4fGQoD6gxUYLEdBHopBMRBkWT
NIZPffqkIks5S/s5kpYK+WMuKVCBEPRSBL8UQRMh/jK5rdkwlrK8ZTLFBTdlQsQCVvljKlNXt/9h
Jj4IbGY2GchMbVYAmhSQJknmVjcSzgyByNRmM9eYTjJMsgKoTAnlLgO+7rHTnnu05SxPGc7QWRGd
90znx7K5S13yM2D3AyVAFRpDQimTAnr6Izh7OdFeCjNxn1xoRj25xVlCFJwbOqZGRbpNjRTRgRF9
3lawOVKW4rOkLcVMQjX2T5hmFIQ1RRsbTYrTmt6Qp2EJ6U+Fasd8DpVfRDVqUo/TUKUWjlc0bSpL
BRpVptoRqlSF6U2xWjuEXnWrNQ3fS78qGZN6daw95ahSy7rTszZVq0aVaUnZ2laqXlOsQ9VpWOm6
/tdRypWnca0IPfk6WKTeVaSADaxZCUvVtN4zqIuFrFeqyk7ETqSykcWsZRtLy63oNLOflYleG5nM
stoVtKftlE9nqVPFonavm83jZbnqWtoqb7JtlG3tarvblRqWi4/lbXAp8xHTGlGwVhVucnuLFuPG
UrnPdSlzPZhb3ULXuvK5Lf4UOdfrKle146OuQizUXfLatqifA2551dul7DLuuIVdb3wle96dhfd7
3JVveb/LtrXm17+Dg23H+vtfAkc3sFQbcIEVjF1SCji9C4ZwaulrqPd2SbQRxjBKLryRbyU4wx+e
r19L9WAQl3hTWjmUfb9nYhabl5thWmtrW/zf/o/JeEvF7RSOZ7zjvvq2aqzlcZANnNh+wtLGQoZw
xo581C4tGckY3i9zVEzEJ1cZqNqKToytvOWNTrg4n9Qxl8U83BfPzMNjRvNyR2vOc6bZzZ5EMVum
vMw313nInSHLnOdsZz7XGKisdTKfnxzl1LIxzIJGdIh9jEQjJ9rRfyZu51Sq5kdX+s6WxRiQLb1p
/XlZz/jl9Kb9fOCYjDfUp/5RnIO0YUaj2tWp1tmnXz1rzhEK0LTGNawXTb9c91rXpC60r4UNaWBj
iNXDRjaZMa2jZDf715vJtLOl3WUO23ra1+40RI59X2x3O9srJrK3xT24sOpnz+NGN505A+p0/ou7
I10xdbvlDWCOBHrezrb3vfW9b37329//BnjABT5wghfc4AdHeMIVvnCGN9zhD4d4xCU+cYpX3OIX
x3jGNb5xjnfc4x8HechFPnKSl9zkJ0d5ylW+cpa33OUvh3nMZT5zmtfc5jfHec51vnOe99znPwd6
0IU+dKIX3ehHR3rSlb50pjfd6U+HetSlPnWqV93qV8d61rW+da533etfB3vYxT52spfd7GdHe9rV
vna2t93tb4d73OU+d7rX3e53x3ve9b53vvfd738HfOAFP3jCF97wh0d84hW/eMY33vGPh3zkJT95
ylfe8pfHfOY1v3nOd97znwd96EU/etKXB970p19kQAAAIfkEAAoAAAAsAAAAAIAC4AGHxnAZ2pkW
1rIcxL4po8JLlJlqf3+Dfn6Lf36Afn9+eY94arVwWLx1OruGHa6YEqmiDZurAneyAWC6AGHJAIPY
AKbXAL3aAs7jBuDsGOXgM+rlQurySerrWe7eauDeec/ufsT8f9P9f+f+gfX8h/z2k/7pnf7fqP7T
sP7Kp/65oP6rtOah5rCI8p179rZy99J3/OV0+vN16fVv2Pxy3v6G4v6W2/6h0/6r5f7Y/v7+/v7+
/v7+/v7+/v7+/v7+/v7+/v7+/v7+/v7+/v7+/v7+/v7+/v7+/v7+/v7+/v7+//7+/v7+/v7+/v7+
/v7+/v7+/v7+/v7+/////v7+/v7+/v7+/v7+/v7+/v7+/v7+/v7+/////v7+/v7+/v7+/v7+/v7+
/v7+/v7+/v7+/////v7+/v7+/v7+/v7+/v7+/v7+/v7+/v7+/////v7+/v7+/v7+/v7+/v7+/v7+
/v7+/v7+/////v7+/v7+/v7+/v7+/v7+/v7+/v7+/v7+/////v7+/v7+/v7+/v7+/v7+/v7+/v7+
/v7+/////v7+/v7+/v7+/v7+/v7+/v7+/v7+/v7+/////v7+/v7+/v7+/v7+/v7+/v7+/v7+/v7+
/////v7+/v7+/v7+/v7+/v7+/v7+/v7+/v7+/////v7+/v7+/v7+/v7+/v7+/v7+/v7+/v7+////
/v7+/v7+/v7+/v7+/v7+/v7+/v7+/v7+/v7+/////v7+/v7+/v7+/v7+/v7+/v7+/v7+/v7+////
/v7+/v7+/v7+/v7+/v7+/v7+/v7+/v7+/////v7+/v7+/v7+/v7+/v7+/v7+/v7+/v7+/v7+////
/v7+/v7+/v7+/v7+/v7+/v7+/v7+/v7+/v7+/////v7+/v7+/v7+/v7+/v7+/v7+/v7+/v7+////
/v7+/v7+/v7+/v7+/v7+/v7+/v7+/v7+/v7+/v7+/////v7+/v7+/v7+/v7+/v7+/v7+/v7+/v7+
/v7+/v7+/////v7+/v7+/v7+////CP4AyQgcSLCgwYMIEypcyLChw4cQI0qcSLGixYsYM2rcyLGj
x48gQ4ocSbKkyZMoU6pcybKly5cwY8qcSbOmzZs4c+rcybOnz59AgwodSrSo0aNIkypdyrSp06dQ
o0qdSrWq1atYs2rdyrWr169gw4odS7as2bNo06pdy7at27dw48qdS7eu3bt48+rdy7ev37+AAwse
TLiw4cOIEytezLix48eQI0ueTLmy5cuYM2vezLmz58+gQ4seTbq06dOoU6tezbq169ewY8ueTbu2
7du4c+vezbu379/AgwsfTry48ePIkytfzry58+fQo0ufTr269evYs2vfzr279+/gw/6LH0++vPnz
6NOrX8++vfv38OPLn0+/vv37+PPr38+/v///AAYo4IAEFmjggQgmqOCCDDbo4IMQRijhhBRWaOGF
GGao4YYcdujhhyCGKOKIJJZo4okopqjiiiy26OKLMMYo44w01mjjjTjmqOOOPPbo449ABinkkEQW
aeSRSCap5JJMNunkk1BGKeWUVFZp5ZVYZqnlllx26eWXYIYp5osJjKlhAmiWaeaEaapZJpprPghn
QWqSMWecCN5JJ0F64gkgmgjUeZCgAvXpp36GIkToQIseWl8CCEDUaKGTOspemxJVSqml7yX6kKaM
gsppd5heJCqjo5LnKUWnoprqd/6rTpRmpJ+2+upypWqkp62b3jpdrLIaCuygvPr627CSAovsnsYi
l2tGy/Zaa7PEBdpRmqxmSiu1vGG7UaDFEhtRtNyq5u1G5DaUbrjljpYuQ+d6VOy77XYWL0bglrQu
u/Vadq+p1qa07bT9ivavqfzqGm7CBStGr0IHr7Rvw5g9i1HEL01MsWQPQ8ywSfN+vDFeHStackoL
j5yYxQiLLHHIKhN2skEY/6RxzHzly9HMNS3sMs5fAXotzze9+zPQWhEd6tE63Yz0WpAybefAVjn9
NFk1Z5r1VD5fLdbW40pdFL1iew2U0qGaZbTZWYFdK9pOWc123HDDzXWmc9Mttf7bZcmd91B12500
zH8HBe7eZXvVdeE82c13XGszjpPjifdNuOQxPQ6v5ne9GzDmLyPuGLuVgz7o59+W/pbRqpseuOB2
sW66vIFvFvnsLQ/d+l6L4x622LAP5rfvJuu+u2DDE88ywq2lTDyfwAf/WPKFc76Q9QZfLvnrujn/
N/YJSW9771eDH/7x42uNtPnEik8RBRVUsNjtG1Me0wEihGAQBRH0HwFj5GsX+2jmvoiE4IAIDEH8
KkAB/gEwgL4aIAF9QgELWCB+FJie916lM3RJ8CESmIAIK2KBC8Tvf5BZGNUOZT+VSOCFL5wACRmY
wcjIzk8d1EgOUyLCHkrgff4N5F8NbbjBMH0QehexAAYyYJEG+nAh+BOBFPN3wAWesDIQ1NIRKTUz
CzzAiw+QCAjGOAEnTuCHEykhBlFImRtqMXocyUAGMHABL0LkACAYiA9lmMY6VoCN/irilLZoJ7hd
AAOIxIAdKeLDEL7vj5zJYpNa+JFEKrKJQTwjbdy4pOVZhJAHQaQFLhJECmgyI3nUDP2ORDlRPWCJ
GCHBA+RIkTGWEo2oTKUq1VckQu4wIQ/4YjAvkoFgDhMiY0xlGXGpkTIOsWLBEhIlHSLHC9QxjBWR
YwYugE2HHEB/IjkjDNOHtx4R0nqIrGY3JaJNOR4zJhLIJB9tF80bebIi5v5LZAZGaZEIaHOdF+kh
JjPpGbKhr0Gt1MgSLwABYrqzoRmJoSMrckvQkA1GoBRcCWI5EAc0QAMNaEBFeihCZk7EjAarp4rs
9suNnICjAgmpTEdKUgmMkZF7zJ6sUJTR0s0yAxq4CAliqoGigtQBOH0iRSvqLklyqG4t5YgxgylS
gRCAABHZqEA60AGQVjWpEwWiE01akAPQk5dPPSf62nkBBtyADAu46gLuOBANdDWkJqCpOAdKAbIS
RKvkHNeZEoqSdhbTBldN7FwnUlQHaMAEeZUISUtqkTLO8yCAtZdTEVq2ZTlAjkjNCFsbmli5TkSm
M4VsRCZrU112RLUpRf6rg3pqKwfY9gEOAGg23SmQGfjWtBIpKmoHYoLMMqSmITnBS0lzUc5+5F2G
Da1GToCCgfz2qhPhqnClS4YSlMCsDqEsRxaggoEs1zSkO2h41PqwooLWASQggXErgoLqWhWrZKCB
RDrAga4GlSYMCHCAF2BfgYC3qTslUE8xAlQNFJONJTDBeSvy1vsOJAb7PWpkZbKADneYAX+db2g4
yR/abgS0CEFBCi5yAxvElQBxFQiGKwJbk3wXISrIsYcH4l1zqRQ/oCzkSlpMBuxKpLQwvrBFamyR
/yLEuyIeSI5V8GGBMBk1zbWP4IL8kNLGGCIEmEFpCRKDGVOkuBVB7f5XrXzlhOgYxGSYMGtI7B72
qu4B1tQtQZC82C5fF79kNnNEXgxoiKgZsoiOiIADLOeH1ODAu5TteqYpEmteU89WFTNwIfLnGhxE
0A5R7Jcf0gDtznQiDPhwgCVCgxp4+jNZPs89WVXAgRj2AfI9iG81XeguAxrUAhGAAMDs5YiU+q5r
HvSb4fwQYMN6s9sJ8sloGZElLhSbEZYwQa5Lhhro1yKgDoCwxe2QPxM4IlztQEgXcuODMGDZzXb2
iBMMni3PzLa2lUg6LQBRgqi4wgaRd7MHIuxxByDU151rfRfOEMeGlLs8hvJC3twQGJR5NXS+jrR/
9ll8Q7wh21wIYv4TG2hwB7vgAji4Q3KcZIMo9+XKBcGBt9sAByC6uFF+iMoLAgPYpDc79mYaULXp
gBLEN74aQXKvBd6QMgsABih/SIdh3OeHGPWoGwEAAAKgdYHA4OsJqUEIIK3Tcv7qdWUzagbyTZD4
QjnnC1F6wJnekIJzne73VWxwjcr2jASA61oHQM8T0mqMQ9s4lP6Iex3Qb4SQvdzXHQBC8L6QlA+b
DGVmOgFUwOu9Yz0jMBDB30cPgITE4NvNo7dy2HuStYckzJpWAA2cHe5xL2T0f7+8QAp/ENjLdeEF
bkiyKfL1wRuc65OXTcaBM2taq0Sbhh4uQ65aehl/Grx2/7tCUP6u/YK82iAsJ4CgUABzkgye4OOu
fqApr5DHX+bnwgn6SqaK6YOoefhNFzjKU7597h+kBjZAEcoFWTK3EcV3EFu3dQNxgBbhat8XSaRz
LPbWEtqUZ1YnXDVXEfImADFgd9vXgQWXEDcAcCMxACZ4EAyIgIGndWAHbqfHXIfnGhunXgYxR/90
dDjodj22VciGf/FmEBwYdf3HfxeHEDdQgK9nggIgeZlXhAqBe8ingU6IXqo3G61EgwghR9fGEOBl
V17VZhEBbCGIeWHIfh1hgmhIAKjHEKGXfeoHEZnXPDFYGgtmE+lUfwghXP8FhgNHEOLGf2QYEbx3
EZ9FbQoxAP6+ZYK9hhAM6IYJsXXdRwYp+BrwN2fRQ4POVBAH5H7GJlMeZWVwxxAxgH3Zt3sP6BCn
KBEe93EGgYgyoIQKMYknF4UHAXiB14INwYkFFYGpUYcuJE4TkEzglBFG9XB/lRH7t3Op2BAAmIdO
loVEx13AN4JvlYiS92kxcH4TAYVvGHauNozoZStcdhgmxhLOVFKupRFXl4F/pYsDQWgoCIKAKBDN
KBEjSBCrqBDutXZFB1mNNhBoWBBxiBHH140CSQNriHHXMydYSDIbBxOl1FeKxwEYuGG+RnVAKI+6
JxAkGBFHaFaryIoCsY8iWRBoeIIDqRF2Z5AyNoWUuCj30v6QdQE74xgRpXRKHrFdZMCHCCF3BwGI
oNaRjKV2JUkGDlaUBHGSBHCNBvh1KUdu64cbdeIpMgk58lcTQfRCJxGKezYDKkByolgQQhkRV+cA
F6ARiDgDaFgAGsGAWgd4ByeLCFF1CeFd7thGsVKVbnGVN1FSWplMY3SXFrGDDJFwqLiMCWFUzthY
ZDACIoAQP8VEhfmKA7CIE4GLAsGN2qgQA5ZqBDGAkEWYECgtNJMZ5agTZnRG6dgQITRCECGaCbF5
LYeKDoFan3gQjsVdVEQQxnRbCJEC1IiIlcmWFSGXZOCIDuFhAbZw/6hZpTkogXSJNPGYCSFPfrUQ
jXRZDf7RbgoBYxjpaAG4EB8lfRCBQGTQTrjVXf5IXcE3EcJ5YUzHfSx5EORFZVXWVJUiLHj5XHp5
ENRZnWM1Eaz1EYo1mw4RnolZjD5ITe1UdGe4hMIWiLG4ACk3n/SpYx2GYOoiKP0ZFqc5nf8JoNr5
EAPaEZv3lXFFlwwxlgThhZ9nEB1XlEMnR42HlifJlIy4mRAxZQvAbJq1OB3aFQ+ZEyEKEsj1Ebs2
ahDBonXlXggRkgpBdB6Rlmi4czyHmaimak8GZSQgmDLzMW/yQPwZpAixQCTRmmc0ohnxW575ERk4
AgcRXSpxjzJAmTgqY1haEaq2nC+XaAwRT6YkPD9Ta/5j8aE4wT/+MxIlShEf9YwFsWIVEZkKUaQj
uXgXIEUmgQIANwOUaaUSehFm9W722aMC6pfX2TlEQ6hg0XzO1xNWxECUyhGLKhFqlhDt+RC9+U4D
8VFkAI62tnhIRUUJ9BH/eIItaYbsplU8umoScZOnOhdHpKpB01k16REldEEMpKhHSqu1mmIU0aAA
hVr8BKMoNhJypG0mWZkouRGiuaxiZUqttZpw8UGsqheG+hMVQEcXBEhGKl5DiYEJ0ZwMMaPFRBBq
hockcVu4JZlJqYjGihF8SKrvekrJJBdKI62KM4FHYUF/9Ewh4aX66IXrdhACyxBqV7BNCrAU6E7p
Sf4QNiCcAQmxFskRgNpXHjuvR4OxQkqtZEpKDdQ/N1sTkCWyIlmyJnuUBeGiI8sSt0YQ1SgDakkA
xNmJeDWzHZGaz4oW9KqzWzGkS2FFDpSL8joSqtWtLlcRJ2C1ddVVKCsSY5eFDsZbZACcAkGld1qb
ZksQINsQEZm1CxEBF3QVF9uzUjGDT8GxDMSvClGxZBBPOMkR3hVZ97egAigQDFsQ6xarHeGrBTF0
DwAB9WUQBKAAFKGgySZxGuGsNyURQNs/XDO4hsGXh+tHissQZGSqkGtcSsuOEnG3oZtbxXS5mkgS
1OmotoZNRhtcplZVqHu1DYRGjOsQEYBBiAoVg/5LuNarsVRxQUHrEH27EZy4vBMhAEv5sBVGfyXJ
uR9hWxrQdwahtg/xj8eGdbDZEY9LBqvbEPGDrWHLFLD7pTwLF85KtkTrnuo6bPdouejpElDKmxcQ
vBbRnKX2hT2hRtm6FFuLvU8hu28BPwEKEjz5EDc6ABt5ngvcElfXvtJFfwi7EPL7cO5LEXtrERzb
v0fxv4JKrXGBR7o0VmqanCrKZippjZbpXp/rEmXJXU2LtgeRwjG8WgIlEvDzR9NrFNGqwU1huHSR
TNaJaqnGrMeoERjGqbBYEGlLoyVRVAgRAnynxCdcuQaxjkiJnTDktxfxqrXbE9f7pSDBtU/xvf4S
0aOLFnEZkZJq6bvJKxHflEDUmY8GoT+M2bn/ZBG3WqkvKlmz2hEVYEHYmsdNk7NY7L8cjBcDHMij
CmczrBDAdpIDcQOVDBIiMAINTBCaa2ttSxHl5YxzrBCTdb8doUTcezY4HBioozB+TBVZaccSplz1
taw+ahFyeZLkawMJjBJJ7J9GKRIeFsQZMVkkwbGeXBPFjE/VWqigHMpN4ctkcABv56cEsawfY5x1
K80f8VMLcc0wmpvGW1YTsc0Z6hFoascYUcs0sbUOYycXg85noWrc7BA6ahBkXMZSNVUhG8kFMcsi
GMj+/BGZDEKWtRAELROpesyKQ5pvIxrbDP7GDSFuASDP8CkDMXDIFkoRkVlMeJibi9lYc8ykOMZ5
O2a/Hc2aIRRDk/rJCjM9fHLSpEFeyvkQKzjTmGdmhzxdaetdt/YA3/SvKtwQCLpyGEq6UMSVBRHU
x7WtBhHSLFGvG2pDzOIxpbFwPCqxDMGN85mnERFm10iNDCfJctur5tmi+2zJT4wQrrajM/DPDFG/
vKxUzWpGAg0TV6zQWAGTJiPZZYFoL/fO9vnMCfGHpHelDx0RiriEPK3AxVSjvSpFspybJWnRtNkQ
/tzQBaHYCvHYAgGYINDFO4E2JH0WjXIn5bwX7By5C4HYC1F8K7mAdm3AN7oRGD0RZJeQc/650Q8B
vxmBRwXxwTmxx+93PpYdGNmIi+lXfaFdETBbmSUMmYaIm/hMYR2Jdxhq3A1hkWr8ERKllTZxxWdF
J2rdGilJEG/JguU9Eac3AFCriA1BfxW91alsEO9NBgAwhpq92RIBWY7svKakzi7B298dNNDDobjx
3wbxdysoxk5ojVMbpSxbf2U5ECBQzRHR1ZmJeyUc19tpfzWHbx5xkz+sEpENayadNrHhagi50rgH
1aLoknW7lAUBfGlbXIZ1y3HcvgdBZBJR2OjngRcBm3LMEbaUSbbdx0zT2xY7LB3+Ft+EmCj4AgXZ
2emt3OW9hGhIzTDO11IuETLuaFlue/7rPJiZ1d4WEQL5m5Ubzt3u4hBkrhiNmH6PSOIEUXwDPs+s
vBBvXBFYLojBJo87h6yYpVUtjhFZXdBjfuZpsSykjhc66ugIceTkLcI3+uYHccQacel9qOVK5ucC
wdoSoUSIVDSG7mObQxuZF+kI4YYiQOwtSQN1WqUtMXvoF5a5l95KnlWzzM4Lwcm6mjmjHhutcupu
IeIRAXUGh+RRLdUHDuvgS42mRwaeje4zjnufdhGA3l05iIMPPEcWqO074+1WudaqgZCcbhBgh5w5
6mwSXRJWDoSlOIR8PncVMe8KYUl01MIjccUrpHyIbhppruYPgZks7alwzhEHsMzKVf4ReX6cycjw
/MeJ026yFLnVD2FJ4/oy+94tp8Lve6HkT/3oy90RLxe677jNhH2KQdjwxS6P1ScC8sZ78HjPMB/z
iMRQoZM6OM876rIb4M7uR+51yA4SDEfdQ496FidsSG7r1kfY3jl1IWHPKLPt8XfzVR8Xzu7mTwkA
x74RIQVS/RzbYRlsCQDyYRibSAbdDKHg+vLrw9HttSHdPEfwGXF/pnzKTRftEeqCvcdrlrmdXDpU
vFmBixQSHI4rcA8bDpgQiw54HNGopxYROXbYsl0QyRjwAQfRhpkROThHS7RNFB8sbt8cN/8ad/nQ
5D7fiGZXyKa3MFfyFyrflbd/n/5KEcDmWwmQ+RmhT2dJO/se9w4z+rVRZsjepg7xdi0qvgrBnnsN
9myYjXye9fHmbHQe8b0OEYnETdlf89Wh+LNhhp3J2bNN22RA/gBBRuBAggVRoFiQUGFBhgRhwBAg
AEDBGA0tXqQhcAEBjgNToGD44IEFCyMvnkSZsmCCBCpdkmHZ8uVMmjVt3sSZU+dOnCxV+uQZVOhQ
okUvxkD6ksFSpicPpGwQVSrNBTNUKFwwU4BMhhV10uDIcSNBFCdMlChBBgOGCxdKGv2JgCtPoHDt
3sWbV+9Pl3P3/gUcGGVGqlcTLsXZQIMGqQ1qqlAxI6HNpF0JE7gZNuxFEmsxZP7AYEFwXbqkBZ9G
nVo1zL6rXb/mGaJGDZuQDTO4acKEhg69p9JUkUBy1pteGWrGTJPADM0nPbN9ANi0zumwrV/HTtPv
RQTZvX8X+PTmCRSQD8/UrXtg7w5Rby5wn9M4QeTJX87ALxbl2gwWIOyVS6iYwCOwQAKrYwhBAxcE
z4QTyGDgKgaIS0m9hjpgTCe0dKpMoPrsu485Amy4AaULostLru16WpFBF18MrMUEYaQROxMGwmoB
3C5CKy29SrhRPq+WE7EjnW5IQTUFaxqwRiefxGvJgaSEssqhNtTIvPMsEg+wIDkUCD8RbQjqoIZA
g6vJ0qxks82gZFzJTTmFwv5yIC11tPFGxTS4iTARBbqhRJ7MGkgktx7AYCgqZ1p0TkcfhZOgRh+l
dKADSDDINjyzM6Exx2zKaDOP6CyBhLbaemsnNVWdtFJXrWw00ldnHehBMrZc7YA6BfL005qQG8jM
oTwDDUUWFZWVVmVh7SvZZR211S4JJqC2pjr3XKwBBzIDVqAvgyL2xJtWpa7VZ8+FMVZ0abUQLhAk
gDdemzZsoLdst/0VOZlGYitRnoj1j0lnm123YEqdHdhgGn28i1qHJcjtRt4Y81W5/EQlqSRjeepP
O3NPIldhkauMNeGRCdyVoQkooGAnh6mFGCfdsq2Yposxu+GCDEBra2PpTP5G6eOThwYPYaKh1PUk
eCeYVqeXmdapV0uVI4DC56CLUWiLQj66axoX1drr756G12mYY8aJ5vjIYPgmFJ4T7a+wG5pbbLtf
646vu6tkuW+oc3q5bJzspXigtm/y7IL/8uJ63Lr3hjw1sIGO/LW+WZ4gJxBAIDsn9hjDlwxMd/r2
rsclpbxy1VcbOPXVUbscbZw697y9ikfXMMrTBWr8dd+9K/n3AiXAvFrAAydqZ9xxgmDnDIzanXfX
hac+xtaq944C5M3+W6gHMhA3J5HG9zmn3gXOG3v1i042+vWdvrx77E4kPyfne2Z1+gT1f7//KK/3
X2riJ7vrOG9n5ZsJsf46Zj5k8S+AD4QeACEImNjtBQRdcokBM4DAl4SLgz9xoPQmOELsICyEJHSJ
8fKyuZoYUHE64c8HQRY996HQhgyU4A3vAoKiEK9aLLyJ82T4EpEIDFk6RCLrjJZEu1xwKEyLlwR4
iJMLfOY05/PYCZm4RSblkIvZ0x7MxDeSIu4Fix77Yhqv2D4tqlEoA6Tizno2xDUJqIZuxGNKlphH
nVTAAhXQCRwF4sSXgOYz4KMji7R4Rz42cmt7dCRNIsCySQZSe03b3BQLyZ8FFsV9Z4xkKFVFMFGq
pAKnpCT34qVJmvDnhQ08YillaRd1zfIifjxlBShQgRD0MgQiAKYIMP5okafJryZugaUd22hLZk7J
i820gFtQebwwGjM1AYplM7XpyWcyM5q6jAD8HAabRTJym+ec3DnJEIFTRoCdqlRi+sq1THXWkzXd
LOXl3EkyGtLTnv+sJTN3mUsKRCAETuqnP/+50HvqUaH+IwkqDepLig7zOqB8yUMZytCAyrICF2gn
AQv0SXNu1KS8I6UsdxlOBrFEnqw6aUxNh0+ZmpGkGq3pSU2Y06wRpaQ8zWnrgMq4cuJ0qDLt6FHt
mE2lNlVRKXWq406I0ahWFaogsyoa3/TTrCp1p129CFUdClayCuWlWC2r9Npo1LQeNalWraFY2zrX
rV21qXINGlfpWv5VbOqxqms9614F2xO7IrWfgR1sYm3y1o3idYaKhayAaIrOokbWsm8qrDYd+0i2
XratjJ1lAvqKWc+WdiiI3V8z4zpa07bWfEINrU8769rBQtKRm6WbXmlr2a/mEbe53W1wPWlbLt5U
uMflpkpYq0OXKhO5zx3uZP3329RC17rJ9SsJqVvd63b3qSCc4DJ1693jwvZ92yWIisi7XuxmF3vG
ZW98ZZtZyDV3qfLFb3uDtjr0Tmm8+fWuee8W19kCmLygPRmBDbzgmertaApmcITTRN9n9VetEsZw
moi7LPtuFbUZBvFOPiwpdEE4xCeOIHhpBV8Ut1i/aD1YXF084/4JS7dGBC4wjSUcPDaJdpHL1XGQ
JWtj9q01x0I+ceuOXC7ZLhnJSRbwSCv7ZCozLqNSXmuVtawXJQPPyE7eMo0RvMYfgznMQt5w1ox8
Zjb/TMVXbHKb5Sy3K/8sy3PGsxnrrLsv59nPXO5tdJP5Z0JbmcgZrSGQC73oFDuYyYNmdKRN5yxF
92XERpR0prm8Z0SvWdOfNrSjZ9hnUJdadxRuaFDUa2pWh9q9qLs0o8zc6kib18IipHWuAd0sUuva
166GcR1/PWxg1zV/xEb2roONvmQ3W89hJayzpb1pY8t61tOmNYKUfG1s+3pFsf5vt8WdapQ+dtzn
NqM8W3RrdP63e7/lRp275U3nhq563vcmaky4je9u75vf/wZ4wAU+cIIX3OAHR3jCFb5whjfc4Q+H
eMQlPnGKV9ziF8d4xjW+cY533OMfB3nIRT5ykpfc5CdHecpVvnKWt9zlL4d5zGU+c5rX3OY3x3nO
db5znvfc5z8HetCFPnSiF93oR0d60pW+dKY33elPh3rUpT51qlfd6lfHeta1vnWud93rXwd72MU+
drKX3exnR3va1b52trfd7W+He9zlPne6193ud8d73vW+d7733e9/B3zgBT94whfe8IdHfOIVv3jG
N97xj4d85CU/ecpX3vKXx3zmNb95znfe858HfehFP3rSlw/e9KdHfepVv3rWt36wAQEAIfkEAAoA
AAAsAAAAAIAC4AGHxnAZ2pkW1rIcxL4po8JLlJlqf3+Dfn6Lf36Afn9+eY94arVwWLx1OruGHa6Y
EqmiDZurAneyAWC6AGHJAIPYAKbXAL3aAs7jBuDsGOXgM+rlQurySerrWe7eauDeec/ufsT8f9P9
f+f+gfX8h/z2k/7pnf7fqP7TsP7Kp/65oP6rtOah5rCI8p179rZy99J3/OV0+vN16fVv2Pxy3v6G
4v6W2/6h0/6r5f7Y/v7+/v7+/v7+/v7+/v7+/v7+/v7+/v7+/v7+/v7+/v7+/v7+/v7+/v7+/v7+
/v7+/v7+//7+/v7+/v7+/v7+/v7+/v7+/v7+/v7+/////v7+/v7+/v7+/v7+/v7+/v7+/v7+/v7+
/////v7+/v7+/v7+/v7+/v7+/v7+/v7+/v7+/////v7+/v7+/v7+/v7+/v7+/v7+/v7+/v7+////
/v7+/v7+/v7+/v7+/v7+/v7+/v7+/v7+/////v7+/v7+/v7+/v7+/v7+/v7+/v7+/v7+/////v7+
/v7+/v7+/v7+/v7+/v7+/v7+/v7+/////v7+/v7+/v7+/v7+/v7+/v7+/v7+/v7+/////v7+/v7+
/v7+/v7+/v7+/v7+/v7+/v7+/////v7+/v7+/v7+/v7+/v7+/v7+/v7+/v7+/////v7+/v7+/v7+
/v7+/v7+/v7+/v7+/v7+/////v7+/v7+/v7+/v7+/v7+/v7+/v7+/v7+/v7+/////v7+/v7+/v7+
/v7+/v7+/v7+/v7+/v7+/////v7+/v7+/v7+/v7+/v7+/v7+/v7+/v7+/////v7+/v7+/v7+/v7+
/v7+/v7+/v7+/v7+/v7+/////v7+/v7+/v7+/v7+/v7+/v7+/v7+/v7+/v7+/////v7+/v7+/v7+
/v7+/v7+/v7+/v7+/v7+/////v7+/v7+/v7+/v7+/v7+/v7+/v7+/v7+/v7+/v7+/////v7+/v7+
/v7+/v7+/v7+/v7+/v7+/v7+/v7+/v7+/////v7+/v7+/v7+////CP4AyQgcSLCgwYMIEypcyLCh
w4cQI0qcSLGixYsYM2rcyLGjx48gQ4ocSbKkyZMoU6pcybKly5cwY8qcSbOmzZs4c+rcybOnz59A
gwodSrSo0aNIkypdyrSp06dQo0qdSrWq1atYs2rdyrWr169gw4odS7as2bNo06pdy7at27dw48qd
S7eu3bt48+rdy7ev37+AAwseTLiw4cOIEytezLix48eQI0ueTLmy5cuYM2vezLmz58+gQ4seTbq0
6dOoU6tezbq169ewY8ueTbu27du4c+vezbu379/AgwsfTry48ePIkytfzry58+fQo0ufTr269evY
s2vfzr279+/gw/6LH0++vPnz6NOrX8++vfv38OPLn0+/vv37+PPr38+/v///AAYo4IAEFmjggQgm
qOCCDDbo4IMQRijhhBRWaOGFGGao4YYcdujhhyCGKOKIJJZo4okopqjiiiy26OKLMMYo44w01mjj
jTjmqOOOPPbo449ABinkkEQWaeSRSCap5JJMNunkk1BGKeWUVFZp5ZVYZqnlllx26eWXYIYp5osJ
jKlhAmiWaeaEaapZJpprPghnQWqSMWecCN5JJ0F64gkgmgjUeZCgAvXpp36GIkToQIseWl8CCEDU
aKGTOspemxJVSqml7yX6kKaMgsppd5heJCqjo5LnKUWnoprqd/6rTpRmpJ+2+upypWqkp62b3jpd
rLIaCuygvPr627CSAovsnsYil2tGy/Zaa7PEBdpRmqxmSiu1vGG7UaDFEhtRtNyq5u1G5DaUbrjl
jpYuQ+d6VOy77XYWL0bglrQuu/Vadq+p1qa07bT9ivavqfzqGm7CBStGr0IHr7Rvw5g9i1HEL01M
sWQPQ8ywSfN+vDFeHStackoLj5yYxQiLLHHIKhN2skEY/6RxzHzly9HMNS3sMs5fAXotzze9+zPQ
WhEd6tE63Yz0WpAybefAVjn9NFk1Z5r1VD5fLdbW40pdFL1iew2U0qGaZbTZWYFdK9pOWc123HDD
zXWmc9Mttf7bZcmd91B12500zH8HBe7eZXvVdeE82c13XGszjpPjifdNuOQxPQ6v5ne9GzDmLyPu
GLuVgz7o59+W/pbRqpseuOB2sW66vIFvFvnsLQ/d+l6L4x622LAP5rfvJuu+u2DDE88ywq2lTDyf
wAf/WPKFc76Q9QZfLvnrujn/N/YJSW9771eDH/7x42uNtPnEil8RBRVU4LD3G1Me0wEihHAQBRHw
T8Fi5GsX+2jmvoiE4IAIDAH8KkAB/jFGdtwaIAF/UgELxK8CERgd/VKlM3RJ8CESmIAI33cBCzpw
etpKlf1WIsIJSEACFakgBuUHGQjiqYMawWFELpABi7Swhf4wnEgD+ZdBjm0QTB+E3kUeUMIHVGQC
DRRhEBOCPxFYMX8IvCADi8gx9X0piZSa2QXGaIEHOBEiIEgjGaAoxYpY4ALx+19lbJilFWoEA3jM
wAXO6JADgIAgUpSAHCXyRgtycY5HlBIY7WQ3PGJAj3yUyA9dGEMM2s6LioxeSDLgyEhKZIgNnGJs
6Kik5VmkZj3ECAn2eBFQUjIjf9TM7ZBEOVE9IANmvAgJHJABXE5EjUN8JUbUeMmwGWmROkzIGPeY
y4rg0owO8ORC0hjLNYoyI4IcZMWCJSQ7OqSX4JQmRMDZSwc85AD6E8kLXTiB9OGtR4u0HjlZ6UwN
gNOcM/6JojBlyc0bmbIi5uvlI8UJkQhkwJ4PgIBGRmgRUFJgn5khG/oaVMuN+BIj5XSABjZqkXW+
sJXBBA3ZYLRIRn6kBKoUSANW6oCWPhGI14xIMGPKGdJNlEB2S+ZGNJBSMmxUAw1wKUUmKQFiSuSF
SG1naEZ6opJKj5cZaIAuBfJToOJzIkRt6ExJQ8oP1U2nHDGjWKW6gAUQYAERQalPObDRoPqwjVqN
Ik0HcoBiGrND/2QV+siZAQbcoKyAhUhdqbpRB5jABEOFaUMZ+NC5kkGt7hzXmSqKkoOGkwCYxWxZ
J7LSoDbgsFj9oWMdMkTHQtZeAYyQ4JDFS6FqJJwQIP6AClSgWc521q1kAC1EiGrUjuh2qf2UE2UZ
0tLiXjUjvRyICmYwg7NOpKorJYgJTssQxYLkBCcoDVMZtNpi/TQDrtXICVCg3LPWoAYS0UAH2ipV
gpSgBINtCEQ9kt3T2DRB8bTed1tKgv5StyIoIK9BaJDen7Z3JgwIbIAJEt/syapATv3YfgtSAhPU
1yI3EAhg0UqGGEgkurmdyYY3697/LjW1iBruRQqbEBSk4CJ/HbFAPFyR35YEvgcZMYcF8l5zBRc/
JTWpSv6a2YnoeCA0poiNQfJeEwtktioIrECWbF/SAblsQXZIZs9KAInMdgZSnnGSJ0IAJzPktgc5
LP5iF7KA2ZaVAQK5cPNQfKnXle6W9EQIAZpb24hA2awHicGYH2JWzDbYIbeVqpqprJA2LyDBKJAz
RGpw6G1iss60K4lYxZoQ5m55IlFG63kDHZEtAxoiDWDvZysCWAbAWSI0GPVntnuevAZrr+R8gH8N
slzadhm9Fxl0AAQggAA8ZMvOhUgHlg3UA0ukzaF+dEQGLVI6k6q7FjmoRObJxwpbeCBFFkgNCGyR
JAfg3Oh2iKc1mwIBO2TZHQCxQnBsEGi/GSKCRo2Vw9NdhrUUvMf9Zi8TehAXZxizBaH2tAVC7IYb
uyF75vNAAkzxhTgg3vKmcJMV8udXLwQG+TaXtf6pE2SeGTe837zAaMt61lOLudxkaDixHw7xcBsE
uzjHLggGy9Li5lbNPXbIvRkCA9jcFzv93ulGy0mCEvS3vxlB9o6RXG4BwGDmAVC4QUw99Yak+qct
XXNG0j0QGJg9ITUIQaWr/WCS29kj+w04Gfy7cYnsObNdf3lFGg6AGTNE6gVm8UYAQHjCv+DsCYn1
arqKK02GZL+HRMjaF8JcPhMA2AYRdsMXQvhi913MWifDcvmcd4aAXe4VQfe5P5+QGJC7eW1vPOKO
B94Pc5QhnuYwDRRubtXT/CBYP3dBFL/1dSug3RV3COonYnYYDBvdrCf1KEfeG1v/uCTgRDWaJ/7C
+7rKvNgK+X70B4J5guDdIJHGOUmKLpBhFzsA4wf9RSY/x+v7Juko2XQzvZ5oioTcIN/3ewDocAKA
EDVgAxSBXYe1cxvRfAUxc+PngBZxXuUXWZJyLNi2EuA0RgR1EMzWWTAHgDHAd+HncB2WEDeQYSQx
AAOQEBJoEIQHf8b2gv7nelxFfa9RcgWUEJwUTk/3g09Xd/DWbGLHfdTGd/+HEOCndwdxAwz4ESxI
ACyIZIKWhAexeoTHfhVRhamxb7VRSzeFEAIFSQ0xWMsWXYyGbwXhfgV4gvgWeiGxZSxIA6/HEL4H
fzUIh+6Cg6YRYTaRRx2IEA4AglNWhBKRZP4OJ3xuCBHEVxH/hnIHMQAzEIUt2BDN536rpxCKSBA0
6BpHxxoqZhLaNBAHRH+I1n9TZmYNEQPeJ3M014gPUYERcXK4x1wDIIUfh3gMB4EIUXgxSAadqBCm
WFNeWGWOlxIeBUPUlE4YAV3O9lhCZ3MDYXUmSH4TcYAG8XXPSBBQlVEFQXEokIIRN4UIIWhauIZ4
iBCqZ3gOQYHM2Ie2kmWHEWFhOBCiVVQdoV7sZRD0lhAsx3IPGANXJwDjh40SkYIDkWjbKBAaZU8A
916HJWngVokJZ4US8XyZuBCuV4eLdz1zUo8ko4Mw4UqjRRH6aFVpmBCA94DEBgBWqIIT4f6EB6CQ
CbF0tfd3n9ZhFkkRiRh/VKiH+rYo9wKSdQE78ihTW/URQDUQKXkQd9dnCjFoMEkRQ5hxBlFONbdl
49YRAwl/8ceFt1EnnkKUkIN/+SRXKKGKBVF5UBmVBTGVCMEBCVGVDjACUbduXdaAZwcAXklzwVgR
7zWMk1EzZOkWZlkTIUQBSEUG1JRGgikQSgURQVeLydYQsnZm22cQZ9heIyACB9GNf4eXGqGLZICF
APCXBpFgJEYQCnhYk0mM0kIzERWKNsFb1eQQ68RQD/Ga/qhZeWmZp0iIDoFFAyFWPocQKZCCxncR
nYiJGdkQMkZxEukZwqIo/kKbLuGZCP4RTPMlX4EUmQ7Rj3qGd6WHdgioEA2wbBwgnA+BQOQkVN6G
XQsGbr9Zg+qYiIQ2Yu6WPZVSnYOJZYV5ENqJEFD0UN1ZXaLlEaZWnw5xngiRnpuZEKm2EJZVTrx5
Ebd4i3mphw7nkwhhb6t5Yg6xK5FBjzdhRQuBlqEFRAqaewzaEHCpmWe4fEHVUgtJWOWkUB2RWXOo
h2bneRABbaF2YosToIqTgTgxoCGRoB+RewoQkwuBcXaZjZ0FiQThkMtnEVKoobiIEKgpdNGWEE3m
dI8pPB/zJg8EoEaaEBWkpCBxjyCBWSpwEcmlEFN6pdC1EjcgiZOIcJlHmqz2Zq+Wfv4noGYMkZjg
CRhEs4NjYaI7EQHxA6kjkVUVkWpWORAv5ojFlUoCahDQlQGd6aYhEY4CwZYUSXUZcQA6xgD76RBw
+hcfxKhgYX32hxNaxD+iyhGUaluZ+Y0UcU8PEHDp2QAc8I4DYWD4hEUJ9BGS1qcEAZYY8V4gWp4M
4VCJGpJHI6tBo6Zr6hAVZEFbJBK7GnjsSRCt+hB8FUmJZqwJeaMg8W0FkZNAuZuQ1XEU4VBFRU2x
s6hHiTXY2ROFFKkkwaIVwWzNhhDT2RAH5ZCRxAHruVKBWBJQJU3IRgAcWWOGKHrSdq9JyZi9ZZjZ
2q1UIZJHMUbhShJlqhDqtV64Vf4QCesQS0dwKgVv5ZoSmxZN8YpsGtGUPhRKJQk1ITuPaqoUkFoB
EhB5NwFaLHujL9sQJqABckeznMoSfHVcN4CXL4poHMWzPWugP3sWsaqtXUGyS3FBDYS0knebJgFa
NHlzFVGocxlvD5CrHaF2YvieApGcZMCWBPCkH3ZbGUsGKZuirtRKDHQVSiO2XKGDIqsR3xpHaIsQ
+gqZQ+QREHms63WwHJFdtzS1BkG3HMGuA1GhCTWfpSqN2terj3WhHFtak4uURMQ1idu4UXGYTmGy
DPS1BEFNgaS74flfVemuCyGF9blg+pcQotsRoEsG90QGTfthBgtidccRSfm6Df6xQJALFbNLu09B
tlJhASYUudVFkhoxeSbwgVmqEDxaiSqYrshbEiNArPGWEIH7ENNJs27FuiLxsQrxuCfLFLNbGIwL
F9bquxOxZktJZsg2ADDpvi7RtqObAWrJEPe7mVwbEwE7ikcRttxLNx/Rr1EBP6EUEhccmpbntwJx
Swz7EhCsfxdgEdNZpYOIEYNbEREQvkoRwDKDpG7hR9WUTQcKpnlXwgzhenzrqQP3EiGAvwe2gfs3
EdNpYC1LESF0rR5hthEgvj2RRIrbNrYLF42pTx81EQnmalM3wQ9BY5KIWSgcZ/WrEkv8gU2cazB8
ENCVvoeKVAYsEf5rSYATsv4dDMCJ08VQga9GtmGvpr/TloQseKpkEGkegU4JpKTEeqn6E6ERHE4W
ca5r1VZ4vBDj6hEB68dnE7RmOrR9IcKNZWRuJm013HoGQYm3SAY3wMkgIQIjEL+oOBDLC1sWMad2
bFVvxaQgEbBabBNcHMhLgToKQ8hUAUpfa2HyGWB/FqIV8ZcLjJAq4bCqSwbLm2cV4WtL+kMkIbA+
wcwABcJfA8iHMV8HMKaGehBuxgBtLBFfSgaSSIkf0bnoycQGEb/qxRCvrGG++RHELBLLOxNh6zB2
cjHKjBaCSq33KRDn2Gm2SAAF4BE3qxD4exC7jIJ2R54GzU5jjFUPtRAJnf45P6POYBubbzMaOibR
BBGDvxiV+eZpjvxa4ZS+Z4i2EAzSEPGUlamrBw0RejxaKe0S/IpCrqIuzowX0+pxC7GOHqqTBZHT
CVioTcZXuJS8DBG8DOGgDtFrbSl5aAxIRe2qoczLRbPQNcQsHlMa4Ch6YeoQGJmOBQGoCoxZKVjL
pksQdEwGy/oQYM0Ql2nCZY0QinwQaU1a+hTENJHMD40VQmkyk10WaqZ+BNHKUq0QA/l+0XfPx8aj
WVsQTlwQIWBFUzqsCNHRsUhoiS2mZ22PBtyYacSdjcM0T93SExRGn/HOlzuaiAeBfSfapSaHGkEC
H10QUyx5wwedMvYQb/5Mw2rbsW3tQZe9Ff25244hkHotg8DoETWAtQ3BzxL60wcJl0AZ0xAx3R0B
U3usLzocUe3D3YoBrTDoixyxkXu7nAthRswkoUw80ASh3pTXyjKdZmumURPqEdwZ3yKBNvYNNdAj
KNmtF/h9hVSNERmO0wr7TE9cEK4NAtosEWLtdwCweQQBbWCW4CZmAif3yZ9k3S0h2bPm0mkTG+dF
h3b9fl65hTtJBgUQhRMnna5ZAlzdga49EDdw4u1YgesogDMwpA1xocgq4w5BTYWbMbp94Y06LF7e
wyEgiy74AmaOdVX9fAdxz40chSV+ELkWsQrh5O1IEAEouBbxmlUFtf5YrhAh0FtRpNTbq10jGuZ6
QYPPV9W++HnNV9EIEYWYhdWmrckTSOYM8Xp3vogUMZkawFZQS8NezRISbuhg2yqkbheO3hC+l4WM
mM8ZWt4XhRGH7RA0JgAj2JKoCpiQVVh9PhAW4EjIPOig6NS0UYWprurBV9UVSWAzIAN9KukksXsL
F3MzV5EX8V60KBDvzBDgW0ZMpNBdPkojChsZHhHN16FFbIW2CO2p2tewvIttCMuYKH0Wwevh5XRA
+IOOhAEcqNI7c+pwgSwTjhd0OK+erYVo7oIgJxNNXo4xcG7vN9W+F2gG/5lVZaUIse/8LucRPrtU
MxumbhroNOvMV/7RNB1/xi1Y0oxdFUHn1I6fCRGAkxfkpnd6EOFIelTj4b4bAv8bO2majK7XzDrN
9dZcBiiL37eESuiK3qx1sOinKsvrEeFI4AwySgNWuHEqAG8X5T4Qqy70JpF8/0itOz6NAqniMf/Z
rBd6wFZoLpcQvU4Qt4RHKDHqwyHwWx8X0q4QL5DsHLFSQMVTEBFgXKeR04gA1b4Q1ZjrBlEDhR8R
j+ntAE4SNm4cIU8bF5vXRdehyv63NRuavjbUDg/vwaZ1FTsRYwp1V8lJ/R4Sdq8ceA8bFKjw58iX
nW97zXaptchnnd16qhfvW3gQzOVrCd4Q+X4BOF/1zfzvz6H1r/4xjMe+s4u2srmv7TnH8ggxeqJf
ggTI4cVHeiCR/DrqQf+e9/ND7LVhjg2hmsW/uhe65AcxXnOtYWalAKUNfOLX9WmchFv25geB/ACR
gcxAggUNDsSQ8MKDgw0dHkwQ8eHEhxIpXsSYUeNGjh09fgQZUmOCjCRFnkSZUuXKlDE0MoAZc2IJ
mhM1dNDQoMFGFD0J/CSwgEBGATFgCBAQoKBLkTQK/iSYAkXDBw8sWLDKkqPFlBFNagUbVuxYsh+5
TjxbVu1atiBjvN24QK5cBgscHsCoU+9OjkB/2iWKACkAg0xD0qhBRihQgihOmKhJ5oLChW0JJkDw
FWVay509f/4GPVAz2tClTYd12lHFaroiO+DUq3oGUMAaizaMkTqk36AOSZBIiCEDBguWOYf0elr5
cuYiR1dsHl16wxA1EntcwFquRxPdTbyGzXdjghkqfirwaNigUwKzPfIe+jB4hsprj4O8P13/fuXP
HSLgL0DT8ProhKlYq0sj70woCDydHPBIhQ7i+0i9p/6iUKMZNmRsooQysAACtTJTKTkBT0QRtPwK
WjFFF0sz4YSB5prrou4eukk8jyJzy0LehOqLQ6gouqA4sjLzz6wkX2SyyZWWNAhKJ6cki0GCaNzO
IZpKWKsEK3skCL7aNKKNjBtSCK3F8dSksk03L2KTzTfn7P6IR8W0W4CBuzr7MiSm2pttyJN6cigD
gbQycTMp6WS00ctKcjTSHbksCIXVVJALveVubGogIRe44YaUHiuoqgsWOlTRJxeVtNU2WSVDTlcd
PYAEgwjFNM/ounOggZw+Su28qFSiydZTi6zqpESVlXVWZ1+UE9ZnJZWxuQPsJGOvXj+yrj0KCV2J
BEPHZQg/aTFqdlp1U4Q13XXbrHasCeatk9KBNMA3to/kCqq2PlOar76t3K2I4HcP3i9ahF3lNCwQ
QJAg4ognvRffnHTc6EeCJksVpeGEu0DENVdduGQ62zXZUXvFmrfliTu68aZ8MSZThUB7s2ohI1Uy
VGR0Df5uaNmUh24y2nOJng5bgyaggIKTWnYZpO4spplMIQm44VhkdzbuaIqARjrs/iAVm8lrJ4p4
gpdBglptkUzYSzwCNQzUro8NFdg+sKPcu2y/VWS177+Va5qCedf+CGoJJggpbp0GWjkjQecjri3B
L/N6cM1PAxDdzacsvGm3Q1JcgpAszhdCMiL3KLi8xRIaucs/p13vn2t3MXTDQ3q47dE9uik81W09
abhyx5o91sxxZ94zaZdvvrPCf2dbcZFkfnwg4kVinaXYzYU+evFtv3386dRenHqP2jb9+l8J2l6k
+EkuMXzz7y8LZfybC1399Q9nyQMMxYGTCDADx1OU/f5YhJn9NVA6cVKgA1HSv/ZFpyoXFMkFMeic
5CVPgh/sCtlA6BkKSucCeNvgR8ZlKAR6JIKYe+EIZbgZEc6QLYWrIFlAMDeMrJA+LeSID4E4khh6
0IZHNEtJYojEi4BgLQ8L4gqHuJEVhqwj31MSE7WYppFssSxOZAnTGEcGKHpkXK8zIwsHRj8vtrFr
NXTjSnaoEolJrIwqtGJnsOhCI8bRj1+D4x+Zw74M/tByHVyiIBX5tcAlcpEi6d8YP4KsFCJviXt8
ZCafFEhNboQCFqgAJKeXwzlqRIiWvKQjO7nKBXKSlROJQAQoEEtRGq59DwOjRj5kSLAgUpWvBGas
lP4YTIpQoAIVaBotq1fHO25EOCDzWVcQSUxqIkp/1TRIBa5yzFmGwJveFEE4RcBDhxASJMI5YP1S
+UtsEvOa7SRDBYrEzQiQznrKIREb4blPGnqOnxa4wDHrSTrDAfA06+RnQutXvnZGQKCyFEnUShOR
zjGLnQpt5/PgqbuBTgmTa8RoSPVJGmwek57eLFoR+yjSkLbrog3cJjLr+U2ahoCczPnoVli6016+
85XaBGUEciggX/LUqIgaJjFnyS4GLvSoT/WeK6Gqlpyu6aVTZalLscoWD650q0/V6Fdhh1CxllVV
/jSrNEeaVrYmkaFtHZhKrwrXoyqMrklN4F316v4cvO51gSr1a2BBUlE4Cbaq4xFsYrOIVrp21auK
LatW23pYJc4VsmLNZ2HTmsimXtaz+OkrVCkLp85+1rR8lCpGR0va07aWr4wVaVFdO1vQvpWfq0XL
Y2mbWLvCEzOc3W1wUULY3GKzq5kVbnJRm9pHctayyoWsTzWJ24I9F7qXlWxzp3ld7p5Vs4KUbXfF
q6yMIHeLFFXneNWrVtjakLoFW298S8Rc/L0XvvLFbz9ZO0JH6ja/3A1rA+3bECT918AhpO/nwntg
BnMwtLVDr1MbPGH9flfBC6ZwhpHTxc05VsMfZq+FxeZhEJe4wiQNG4lNvOLX7tdkA4aIf1nM4P7e
vivC0iTujHUckhw7xLr9ce6OhTxf20oKw0NGcm3be7KuJtnJCF7yq5z74ydn2Ghv+u2TzFtlLm84
wfqBcYy7PGYiFzlAjqUymVcsqzQvVpptVvOMAzydMEcpznfuJREfOGU899l70k1TB7fsZ0KTN8qH
DHKhFf1nM9vnz3Be9JPnTNUmR9rSSP0yB/l8aU6v1cfsRHOnRY3pQyspkYMedapbLGJzPVrVr2Y0
RlBdkh7LDta3JjWrSZtoXPe6zLoOWqh9PWwJMxKQKykwsZW9SU7e2LvLhjaUv1vnVkbb2sXO7aav
vW1po/jZ3Aa3oY+t6XCXG9sQkV2tzb1ut/76WMnshveJWXRFGcfb2vd5Xr3tzW3/qLva+wY4s+dd
3IAXXMsDjzGkDX7trzxH3wuPt0m+kmyIV9yaXlG4xdedcY133OMfB3nIRT5ykpfc5CdHecpVvnKW
t9zlL4d5zGU+c5rX3OY3x3nOdb5znvfc5z8HetCFPnSiF93oR0d60pW+dKY33elPh3rUpT51qlfd
6lfHeta1vnWud93rXwd72MU+drKX3exnR3va1b52trfd7W+He9zlPne6193ud8d73vW+d7733e9/
B3zgBT94whfe8IdHfOIVv3jGN97xj4d85CU/ecpX3vKXx3zmNb95znfe858HfehFP3rSlzfe9KdH
fepVv3rWt971r4d97GU/e9rX3va3x33udb973vfe978HfvCFP3ziF9/4x0d+8pWvyYAAACH5BAAK
AAAALAAAAACAAuABh8ZwGdqZFtayHMS+KaPCS5SZan9/g35+i39+gH5/fnmPeGq1cFi8dTq7hh2u
mBKpog2bqwJ3sgFgugBhyQCD2ACm1wC92gLO4wbg7Bjl4DPq5ULq8knq61nu3mrg3nnP7n7E/H/T
/X/n/oH1/If89pP+6Z3+36j+07D+yqf+uaD+q7TmoeawiPKde/a2cvfSd/zldPrzden1b9j8ct7+
huL+ltv+odP+q+X+2P7+/v7+/v7+/v7+/v7+/v7+/v7+/v7+/v7+/v7+/v7+/v7+/v7+/v7+/v7+
/v7+/v7+/v/+/v7+/v7+/v7+/v7+/v7+/v7+/v7+/v////7+/v7+/v7+/v7+/v7+/v7+/v7+/v7+
/v////7+/v7+/v7+/v7+/v7+/v7+/v7+/v7+/v////7+/v7+/v7+/v7+/v7+/v7+/v7+/v7+/v//
//7+/v7+/v7+/v7+/v7+/v7+/v7+/v7+/v////7+/v7+/v7+/v7+/v7+/v7+/v7+/v7+/v////7+
/v7+/v7+/v7+/v7+/v7+/v7+/v7+/v////7+/v7+/v7+/v7+/v7+/v7+/v7+/v7+/v////7+/v7+
/v7+/v7+/v7+/v7+/v7+/v7+/v////7+/v7+/v7+/v7+/v7+/v7+/v7+/v7+/v////7+/v7+/v7+
/v7+/v7+/v7+/v7+/v7+/v////7+/v7+/v7+/v7+/v7+/v7+/v7+/v7+/v7+/v////7+/v7+/v7+
/v7+/v7+/v7+/v7+/v7+/v////7+/v7+/v7+/v7+/v7+/v7+/v7+/v7+/v////7+/v7+/v7+/v7+
/v7+/v7+/v7+/v7+/v7+/v////7+/v7+/v7+/v7+/v7+/v7+/v7+/v7+/v7+/v////7+/v7+/v7+
/v7+/v7+/v7+/v7+/v7+/v////7+/v7+/v7+/v7+/v7+/v7+/v7+/v7+/v7+/v7+/v////7+/v7+
/v7+/v7+/v7+/v7+/v7+/v7+/v7+/v7+/v////7+/v7+/v7+/v///wj+AMkIHEiwoMGDCBMqXMiw
ocOHECNKnEixosWLGDNq3Mixo8ePIEOKHEmypMmTKFOqXMmypcuXMGPKnEmzps2bOHPq3Mmzp8+f
QIMKHUq0qNGjSJMqXcq0qdOnUKNKnUq1qtWrWLNq3cq1q9evYMOKHUu2rNmzaNOqXcu2rdu3cOPK
nUu3rt27ePPq3cu3r9+/gAMLHky4sOHDiBMrXsy4sePHkCNLnky5suXLmDNr3sy5s+fPoEOLHk26
tOnTqFOrXs26tevXsGPLnk27tu3buHPr3s27t+/fwIMLH068uPHjyJMrX868ufPn0KNLn069uvXr
2LNr3869u/fv4MP+ix9Pvrz58+jTq1/Pvr379/Djy59Pv779+/jz69/Pv7///wAGKOCABBZo4IEI
Jqjgggw26OCDEEYo4YQUVmjhhRhmqOGGHHbo4YcghijiiCSWaOKJKKao4oostujiizDGKOOMNNZo
44045qjjjjz26OOPQAYp5JBEFmnkkUgmqeSSTDbp5JNQRinllFRWaeWVWGap5ZZcdunll2CGKeaL
CYypYQJolmnmhGmqWSaaaz4IZ0FqkjFnnAjeSSdBeuIJIJoI1HmQoAL16ad+hiJE6ECLHlpfAghA
1GihkzrKXpsSVUqppe8l+pCmjILKaXeYXiQqo6OS5ylFp6Ka6nf+q06UZqSftvrqcqVqpKetm946
XayyGgrsoLz6+tuwkgKL7J7GIpdrRsv2WmuzxAXaUZqsZkortbxhu1GgxRIbUbTcqubtRuQ2lG64
5Y6WLkPnelTsu+12Fi9G4Ja0Lrv1WnavqdamtO20/Yr2r6n86hpuwgUrRq9CB6+0b8OYPYtRxC9N
TLFkD0PMsEnzfrwxXh0rWnJKC4+cmMUIiyxxyCoTdrJBGP+kccx85cvRzDUt7DLOXwF6Lc83vfsz
0FoRHerROt2M9FqQMm3nwFY5/TRZNWea9VQ+Xy3W1uNKXRS9YnsNlNKhmmW02VmBXSvaTlnNdtxw
w811pnPTLbX+22XJnfdQddudNMx/BwXu3mV71XXhPNnNd1xrM46T44n3TbjkMT0Or+Z3vRsw5i8j
7hi7lYM+6Offlv6W0aqbHrjgdrFuuryBbxb57C0P3fpei+MettiwD+a37ybrvrtgwxPPMsKtpUw8
n8AH/1jyhXO+kPUGXy7567o5/zf2CUlve+9Xgx/+8eNrjbT5xIpvUQUVOOz9xpTHdIAIIRwUQQQU
UBBB/CtTX8HYRzP3RSQECEwgAikAv/5FYDGy4xYBCwiUClgAfhV4IGNu9yqdoWuCEJHABCYggYpU
4AIX9N/0tJWq+q1khCOUQAkpYoELanB65FuTBzWyw4hcIAP+GbAIDGNYkf7574Y4xJuZQAi9izzg
iU+kCAgmQAEYzhAh9xOBFvGXQAw2kDI53BITKTWzHwLxAg+ICAjWSAYqEpEiFrxgBShQmQhqyYUa
ASIGgJjGhxwABAQRoQyvKBELoDCDl+EglcZoJ8EBkY9CHCIhI2JDzYTRSXj8CAb22MciGpGEs7Hj
kpZnEYw94JEXIQEZHADEioDAiFWcpBTTN65RRg9UUISiRUjggF72UiJsJEP/QJmRYFpSgERiZA8T
8sgMoHGXQPQlRNYIyJBU03bBElImG9LMDHRyIt38ZUMOkL+RuJGOliSdjxhpvWZeAAK71IAGokkT
K8oykdn+vBEpK8K+R35zIgfIwDzFeRERTuAiVPzkPf1FOvQ1iHJHK4FGVNlLDRB0IjIk4UIdktBh
goZsMGJkIz8i0VQKxJcXlYgkL8LA/m00Mw1lkd2WqREHzNOkNpWnRR1AkSHC0JgRkYBLXwpTdZ5I
pNLzZQN4yoAFODUiqiSDTi0ayTd6sorEzB4yQ1Q3mnbkkQ5oQFPHugCIlFSnYa1qVikCSwq89ADY
3OqZ2Im+bjbVqU5lAETgKhB52tQEJuipPS3S0lgmpKS0rGWGkGrAgsgzmipQAV71KpEGWHapZADs
RHxKVIYYcaOItdcl5VQ2YFlWA5b9ajQjEFnJLkABE9H+qWV5mtnAQsSn1ASJZg2WT9LesiGXTa1H
EBvZBRCAIlPF7EBMENqFrDQkJzhBaUD60NLySraWjepGToACg9SgBhLRAAfk2QCDlKAEfG1IZzEi
3dPENE+vC1cHOoBazJLgvs2tCAq6S4YFqGAgNAgvanc7kwXMYCD7JUh6tarEATHWIvPtgHAJUgIT
tNciNyADAzbcVIHEwCK2jQlencrfgZzXvaPFD2NdRt/yJgQFKcArRUa84YF8uCIELgl6DTLip1I4
v6R5b35EOtKU9Hgi/nUtZT0M4hCH5LxA7q8KZiDj5ToZNdS1j+CI3JAelzUiSc5rQWJwY4kYlwBR
Xsj+aV1sEMBemcfF9TEZLty8FKuHrsE7pTcVEmc5Q6S4BACvQcgcEQIY16k7fkhwhevmHC8kzrBF
AZ0hUoMFw7S3l4oeSXIZRYS01qmBpghlv1sQAAjg1A8hgKpV/WVFk9eyjn7IZBdQYojQgNSfyfJ5
9smqxnbzAfclQX6n7GNBW6TMAUh2AAAQgIaoegarbrVDIlzfitx1xBIpM4OTVR4iN3Yg7vxmhS2c
kBoE+NgCOfWpl+2QGUBb1Te4QQpqrRANzLfaDEk0QcIs5ocQ2r2yEs+WS8bKlDKkmQ+A50FgfObj
EkTbE/mwuk8NAIcQ4N3S3q/GFTLfyx4Wygn59JL+FwKDf6dGlNnxtshQavCDX2Ahqza0w20M8YjE
QAAwWHezu3xmaRckukCPLgjgelmCNvrEDPGvnxUCA9gI2ToD/1k48Rts7VYk5oY+SM0hcnOKk8Hk
CcG6zxky1Z3GmiMwSHu5Q2Dp0Og6OniW2mMz0HL8gjwiU445QsBOBlMLoCEBEECybQzzd2cdIg3A
LkeYzW4yvEDtCbn1alDOnG1yRKD0HCfe3a1qBeB60ANRNgAqrhBlL3vnX+f7QNxt+AxDRLa0zcjo
Zw+AFywkBuduXsArz72RZB7xHoe5qklPBhps/cYTbzxCkk98ABubIJx3+Lw3zpDZaiTtplf+3mX+
Q/ng8LrXKEGlohdNkeMfYOICaL5BmI+Q5w/k8AaRNNBJ0nQyBF70e1d9RNqOT7n6JuoowWkv5xD2
Vl9slm1bh3Pqpn4FoYCCB3neZQMUEV2ANXQbkXb1Z3+Cp30CgYEX8V3ul0671xsqtxKPhEL/xHH3
NmHldxALuHUEsW6EhxDxBhMeaBDJ1nw3WBFklntuZ2dOB4AskQF7xEdVd4R2J1ERxgGw9mZcB3GB
h2r6lxBTSAY3YIEegXUPR2ZVSHvMRgYZWH5V+FEjSBsQ5VAIsUd79Eya13EudnZcF3qm93dfZ3Mw
GBGsZHF6Z24+WHqiV3s8OIbuAoQopmk0sUn+ewZ8S8VmcOgQyJd8M2hrIQgRvUR3sYcQWKdqD4F9
G8iBDrGDr/F05vJbMYFA/OdqwUUQzJVqM+dh55dzMuh8EjGJAtEBC8FyhWd4p0gQN6huOZgQjMeL
EMgQuyhaZWgaD6YSBnVQZEBN5XQRyXWAApFm+6Z3MRgDsKh+tLgQNSCBBJGKCCFQ82SJ8adxN8B6
mkiF2Lh+gseAA+GFLxCPDgGCz4iMtsJlh7FiLGFPEgBUGFGA9fVm+oaJ0caOgldz3TgRNUgGiyaN
4DZ3DgBl4zZpZPBu+XeHfbcQpjd6DYF7fWgu1zMnaKgX3wd+LvFJa7URsiUQjXgQmTh2W1j+EK6n
kCAQYcF3EGh1iQnRcFuIkQ4Rhfinjj6JZYtyLyPZOYmDjxABSykZEi1ZEBdneB0pkxBmkw5JEL+n
EDFnXGRgbhyhc+6YekPJGnXiKUc5Fyp3lgjBlOu1EdRYENEHk1pHlQkhVgxwlQ1gkw5AAiOAEWK3
jROBge1oEKB4EedVjGAUK2q5Ota1mAoxTDIkENS0Rog5ECMUEUjHEJ3XitwImAPBYXc5cgQhYQQx
AiJgEKzUSgsRffCHEZDnhR04jDt5YAdBgYCVmZwhkpXimGqhjzohSf14TQ6RUZFpVm9JBlvJmQrh
mQLBYTfZEFx0UriYECkwZe8GWxcBihv+CQBhqBBeJhAaR5GeISyKwlCkKBOneRAJZUWbNVhmhZhb
KZft540hpwIdcJdXyRAIZEbkOI2AFV0JVpHpeGwJCJay1mMBOoi7WZSJ+RHf9hDpuZbDxIwR4VNN
iRFxKZ8JQZ8HoQLViZ8HYVmkmRAQGZG46ZfQ9nAJ4YuemBAzQGxL91GtsiuR4Zs1oUWPCZmCxZ4d
gY4amhAz6WkS1gBWNxDkhxAQ+RHRFmjGtxDrFpae1mfZszi8qTgDpxMRGhLPlYWq9l8K6RB9WRAN
wAFMyIIGkZUcoYVMp3YciXeutRASSQKVKTMf8yYb1Jg7gaPmFEPFWRGJpwGeZhGpqZP+BRGmAxFh
Q8oSL6l1smlmRwaeQOdmCyFDWEWnCrMyEMUT/wM/JMFZFnGkBZECFZFLKcUAtkgGWcqQNpkBI2Ca
qRoSKHADUblqcwktCJqgD+GefwFCDxo0JdgTRrQ/EfCqHOGpfgqO8UcRv/aZoMkA9ViLHcCEBMFF
CvQRFxaXPakRJdABUjoRbXWhsaM0vWqlDqqUHuFFiCQSwOmn2HWV9PYQmAdJzdmsz9oS5EYQA8pk
2ipR/PajCfGtwemPkEM0JUmSmToUhiRHSKSlFEoRedli+SmeDZFTv8et97lh9aoSQNRcoGZo3/WR
FJFjcUZYc+RWBJFbA/tB+XilRlH+ARhwSAsLEnO6ECZQgMr1cxbhTwTRWhz2Er70ADqZnBvxlD2l
o+GqsoYhhEhRQxmETjqhWUVnpnMGYkAWWXdJqCnhT0CLr1uZEUR7VYZFsoPzM+Y6Fr+6FA3kP067
EH+kErulARuArAMhsQ1xAiZwSgdRY6ZJEmwXjs1EWylwjobnrwgRXGc3s56lUBaxP01bNUczrlyR
lk4RRw0UswmBsgJhRMNVYaPphvmpmfk6Zw5wSp12EMTaERnbV+M4ugGKjsrpEA1pXidaRCV7UJj7
EG1luUzBRJC7FUr7FBdwAZWrRmw0SH2KEbNLBlZJEUsKnt3FR1uLEKnLEadLBuL+uGd0RqsOa4Bs
dnccYbTNKLAKAT9ypEJPIa692zYsOxUJm67eqrgZcYqA5YbMi3Wu92spKBDTyxFhepV0l1kWQZFL
KFzJKxLiixCUO0fn+7hVShWSexXwo7sO0VZtGbIZsagCcb2J6BKgSmEXIcBW+bUwYUhzJMGAQ7Dp
ixW/CxcMVLIVHBEi3BCsWRDxirUp0cF6FkQBfBCe64T7VxItvD9Kgb6FcbZu8UfC+VkvzGNLF8O3
d2vYSmHy2hIh8LDgyGn5+xAUuWg2HEKXKRKbikEm3DhELDwrDBeTKUxYdbwQ8ahkcJz+BpXYObc+
rBJVbJUutqwVQZFld7MYJUj+SxwRcaSwRIG+DSwVsJPCTgGwSOZlBWyHEMeTkOoR5KRAqcoA9mkQ
+bO8GYxwFvGu0YhQuvoRFoABKXTCSIs8Z5wXaduwD4EC/SqaPOiS9vuuISECrUoCzima6dlxWOnJ
FeGljkVeXdwQFhrIPlRJNlPGgoE6CqPIU1FYnWVhABqg3WoRhfl+9rsSJdCsvMxMU0wRwjzMxcxR
WxoS+2sTzsxPZfs1DHzIVGFVAnEAEimpUepUCZPNcGl4r4sROZwQmGyfGyaNhkqME3hmIHHOt9wT
vArPVWMnF+PQbvGdD8F4qKcQNDCrBDDHGwFFlVifF2sQIxABefm5AxGkB2r+aISrUnyKzAKxjApR
vTOBwhL90EX2O6VB0Q3hhVDKhQKhvR6BcF0cWfeJl3JLgxIhdh5hrCplvBsl0zCBwivkKuoCzXax
X5FFZTGKRdnnjoLobMpJgRLZTf+rEHcZop5r0mTAoWA9uGwLxwTB1BWq0AMB1SxRsFVdo8ziMaWh
cfz1aa/1EDrHgY2KZDF3A9R3puOYcNX6EIj6nO3HnNDn1nAK1wJB1w7xShPq0ihjyJPBoO0TGm42
fwZBbFAqjC/gi8SnzxOh1AvxtwQRAlpkqKaaEJzcEJItED7qEI98EII0TZOp2Wu8E2hj1X0jLmT0
GfR8XnUsEaC4gdxZ2Bb+gcG7xJCgidYjmhCWBrIHAWpbnRDNfRFtWxCQ6co04dn9F9q9gY2NytMd
8V0a3c9nqsMIoct2qdYLsZCRqJXRttIseRLr2jPMXDHtY9yJ4dMJ8YenzXU0kHtRrBBP5E1ZrGHz
xWGcLRAoPZQXV5AQQWA59RFMad4uUdw1rTbQIyglDhgIrpEbeRErzrWEG7y5hBABHdIgoN8RwdZ1
qBCs+aNABljT+b3wmzHobS/SQicpnhcfy90HkdqdCKWDd5E7qXd+bbfMBWV63KH2yYI3oOO47X4f
5ncXTQbWGboIMbsmMFvSVEzUNOR3zTQGzpiikuR0QU65DYbxaHtkAN3+7jh6y/aFA8HaXLtqKD3f
ZzThynvWBuHluF0Q2RcACwbU+dZcZddyEBEC/lhFI17kvJXXuqHPLSoQ24mB3Rl2rg3O4TyLd04Q
Poh+zTaWCpGZOeVX4p3OKkHiJzejuVHqD9HVkjgAPX5wG2wRnxfH6QaJO14RmZmThfSyAzjTnH5y
ni4bXMjrn8iiC+5huLd60bcSTRqHew6L6Udzhllh00nPDVFDFvBEFiATuO50DkHndfHizg15T3ra
9K7bZr4RBxBvhb7fU7nnsaiiF2ECLBd7JYCER0gGm+TsiA4ycC7vJHMqcX4XDQ7rCSGbzBaMhFly
MtHlUh6Ft9d360b+hzFZEbPenw1xAQ3/sg8vErwLKbih66Vh56uOEIUNm4Eu3RRxANQcXRXB6KJu
ek7aiWNO7sj1WJaehg3/Ti+zMxK/qxT/G1PY1dFt7R0BdLj65cvHogrh6iIAg5InYAMlEZvEhifB
RF418+qyG/lOEPeXg9kOq7gqyd7llQOBfoL39ch+h8Zm9yRKVRLxAGef9hE/HMhS8YLx7QmR5wbK
EYkntQqxXykgtFRIEAjQdeO+oqoN8ATRjXil0j+c7jXE7iMR81EfQG1PG0wem3Af6sd61GDN4eqY
brB49C64+UhPy9ZonOd1X0zv8CHx7smR+KkfFyCY8TzfEa8m+Y/+Rtkjr4Gohm4umXf7DlUK3/Jo
/0GH7xxT7xqIifUFYWAS0WhutoKpdQBBB/QhF30crRAxMIcYsXUa7d8Rof0Kd6ncD3cUf/x2QWYA
AYPMQIIFCy5AiNDgQjIlHJZg2EGihgYMB55AkTGjQRUECCywyFDASJICYsQImZLgSZQFVczweEMl
mQsZMsxciAHDhQc4cSYA6tNnUKFFjR5FmlTpUqZNjyYY6lTqVKpVrQpt6TNhwpAPVTboQDFCRZwa
U3z8uICAz5IjAQzMqpRGyBQoQj7Ai/fqUKhTgfbdG1jwYMKFLRJVidjwYsaNfbI0umDGVpALD/hs
kFnzUY+dK+P+RBBjZICCcZPSqEGQAEyCKE6YcEjQpk2ejhMgAOxUsWPevX33zp0y+G/ixafORapC
OVelJiSGzcwZpsfPOEkujIF8aWq0CheSAD/bpl7Du5n+NZ5e/frzUdm/h78wRI3USDMuX8DgqAn+
Jsg85yC6og6YoUDqjjKNIO2U6uzAkMTLoKfCzFuKwvguxFC94SxCIEMPi7ssKYwGSoiB6lLqz7+C
wILOgaNKeOmjpBIcqAa1PEJqtQZPNGi2ByAgDDe/LPywSCPL23AhIo9ksjgTTiCIMh4N4u8rspAq
Qb+lTlpISummW0ul2gTDLUmklmwyTTWlMtOgNteEczAVSZz+QYWtLPKqsBLmnDGuBmU8ykCPUvgN
zaLQizNRRc97cyBDF4UUS4g4egkhLQ0KkTE+lcqqzummxAnHgTayyCarENWt0UhXZdVR91qF1ajY
CrqvUlB7q5Ip5F76VCanXlvIgQcivClVqh6NNdk4VSUDWWVbPYAEg0glI7/3ctVAg9MGUg5QQqVy
SFoy8sLLxQqdnQnVZ9dlFVlm2Y0VSvYOmLUgBxxo4N6k6FuIWqnCE0/CM9/9iWB4Dz6SWXQRVlRe
wSSYYIIXJyXoXovNPcqGOwfaVCoIBRZKXUYNZrhkD901Wdlc9wIBBAkgflliWSnOtmaMI6OMIIqn
+vhQkoX++zlloS9UeOhWd2Y54ohfRgpbm28uysthM7jgqvH4CpohkY3mOk13s+5avXoXgpiCCShg
SmmlJWjOBA04yFbf5GxdgFzyeFs4MbDD5tu4ovtOk96Q1mY6bbXZbjvuKzP1STk78xNvTMa2Vopy
wC//8NG8MY+PAs89nwBxpQ6XWSnN8iULaZzwI6PnxTYPCXbOZyeuw59oh/Nz0EUfHWaIl6p5s4aY
cn0wywfeG3flG9M8+eUbO/tz3o9qWe2lgQ+eLHGX8pEw2bV2/nnxJwx5/CI/D70p69NX6u1s8x1o
+6VUr+r4p743P/8JFQ5f/6vMXpv61NaU4BFEfks54JD+jtU//zXwKn9z4Hp0xz7Dla4qHGiKA7JV
P/wVBCi2i2AI2dM8ERpngtNTz9QeQL+iXAxqSbHf/Uo4w/dAkIaO0V3h2GM3kB3FhXKr3AIZeEMi
tud2RYSe2RYDAsbNpHhIqVncXhiy/nUQiVfUDV+wuETDtMwoTzxKFDUARCpWcYhbRKNR3nXGNC4E
BFWRgOcI4sWjgDGMNlMjA63YRj7K8Ih9tAoTpxIzptERKd0j4BjLOCQ2AtKRwnnVI99zOBQaZWoJ
FEwM8yhJTr5OVXvspFOiB8BKCsVuSBJiKFVJvj+u8igRsEAFmoI+CpJBkD6pCdV40kMO6rGRrgSm
o2z+GMyZRCACFDAmU9D3O1saEicQkhwHU0lMaj5Qi9VMSQUq4LlkLmVpMXOmT+zYFE36DJvnPNUw
0UmGClggltqMQAjkOU8R1FMETWSI9Ur5TNrwsnKgbBZA1zlQdaLzAhfQJjK9qc+lHBRIThHSAgc6
0VNFcp0WuEAsIzBLANayUNOkaEgVmK5f0vCYFTDmRr1JyuJ8kE0CFWlM1zhQbW5ToU3ZJ5LMGFOe
PrCgwWxnQikwTzWBspw9RepTrllNjMbypvOEagjwqSGAljSpPUUZNoOqUiZVFaZXBaurCobNbhrJ
pSMNa1or2kq12sarVm3rVfkX18kN8at0jetM8Zr+SV/Cda9hzepfJYpWwRaWTUs1LPIYmVjGvtSi
jdXbYiE7WXIilrIeNKpfL0tXEKZrs8K062dFe67HJlagRx1tapVkWcGitmCaVe1eI+pZw9q1s7HF
7ZlYm1bX6u22uQXuJtkqV68G17hGpC1xQXpc5up2rDztLdBg21zKBpagsz0sdbXblN8eZrr6Oy12
tztePw4XmHb9LnlF+9NORjd2d1Uvc+eqSve+N773dax5+fhW/PY3uzMRLxrPmqr0+je41r1ifb1r
YAbXr7QlVPCCGzxhv+w2gmeEL4X9q9cQRnghZdJwiI9VPgfyV8QnJizQ8jdgY6HYxSN+8OU87Kb+
DL84xBzm3GkLbGMDI5hvOuZxkPfC3pQBWchHXitJuTZjzO4YyRT2MbxYTM7bPNnKgemu1hhm5Ct3
2ZrPfZaJvTzmJCe3VUz2IJnVPGQSr0rHTl6zjb+2qNvoMcBxxnOFY5w5LufZz2WObFfRC+c/P9lZ
hDanZAu96MDgGD5oJgiiGe3lNUpaSYOedKaNR2S32tnSmiYzp/eHXlCXGpVKBk4vTb1qVuq30adl
daxbbeZXY1rWt+arhVusaFz3utFtfukQ7+xrYjt4z4nmdbGV7VOfDHsoWf7nsqXtPWBjTZrTxnYm
q/1eW2fb20Oeb+yqAuJvl1vbpZ0yo8y9buP+tRnSwmR3vHP9WlXL296/dvXA7r3vcyeGwPwG+Kv9
/U9oB9zgWRQ3DA++8H6vNo+fZji2LVRpiEf82xsqeKQrbnFzD+dNNeZ4yB3V2SS9W+QnT3izLo1y
lrMSMORuecz5+peNyxzgNbd5znW+c5733Oc/B3rQhT50ohfd6EdHetKVvnSmN93pT4d61KU+dapX
3epXx3rWtb51rnfd618He9jFPnayl93sZ0d72tW+dra33e1vh3vc5T53utfd7nfHe971vne+993v
fwd84AU/eMIX3vCHR3ziFb94xjfe8Y+HfOQlP3nKV97yl8d85jW/ec533vOfB33oRT960pdf3vSn
R33qVb961rfe9a+HfexlP3va1972t8d97nW/e9733ve/B37whT984hff+MdHfvKVv3zmN9/5z4d+
9KU/fepX3/rXx372tb997nff+98Hf/jFP37yl9/85/dJQAAAIfkEAAoAAAAsAAAAAIAC4AGHxnAZ
2pkW1rIcxL4po8JLlJlqf3+Dfn6Lf36Afn9+eY94arVwWLx1OruGHa6YEqmiDZurAneyAWC6AGHJ
AIPYAKbXAL3aAs7jBuDsGOXgM+rlQurySerrWe7eauDeec/ufsT8f9P9f+f+gfX8h/z2k/7pnf7f
qP7TsP7Kp/65oP6rtOah5rCI8p179rZy99J3/OV0+vN16fVv2Pxy3v6G4v6W2/6h0/6r5f7Y/v7+
/v7+/v7+/v7+/v7+/v7+/v7+/v7+/v7+/v7+/v7+/v7+/v7+/v7+/v7+/v7+/v7+//7+/v7+/v7+
/v7+/v7+/v7+/v7+/v7+/////v7+/v7+/v7+/v7+/v7+/v7+/v7+/v7+/////v7+/v7+/v7+/v7+
/v7+/v7+/v7+/v7+/////v7+/v7+/v7+/v7+/v7+/v7+/v7+/v7+/////v7+/v7+/v7+/v7+/v7+
/v7+/v7+/v7+/////v7+/v7+/v7+/v7+/v7+/v7+/v7+/v7+/////v7+/v7+/v7+/v7+/v7+/v7+
/v7+/v7+/////v7+/v7+/v7+/v7+/v7+/v7+/v7+/v7+/////v7+/v7+/v7+/v7+/v7+/v7+/v7+
/v7+/////v7+/v7+/v7+/v7+/v7+/v7+/v7+/v7+/////v7+/v7+/v7+/v7+/v7+/v7+/v7+/v7+
/////v7+/v7+/v7+/v7+/v7+/v7+/v7+/v7+/v7+/////v7+/v7+/v7+/v7+/v7+/v7+/v7+/v7+
/////v7+/v7+/v7+/v7+/v7+/v7+/v7+/v7+/////v7+/v7+/v7+/v7+/v7+/v7+/v7+/v7+/v7+
/////v7+/v7+/v7+/v7+/v7+/v7+/v7+/v7+/v7+/////v7+/v7+/v7+/v7+/v7+/v7+/v7+/v7+
/////v7+/v7+/v7+/v7+/v7+/v7+/v7+/v7+/v7+/v7+/////v7+/v7+/v7+/v7+/v7+/v7+/v7+
/v7+/v7+/v7+/////v7+/v7+/v7+////CP4AyQgcSLCgwYMIEypcyLChw4cQI0qcSLGixYsYM2rc
yLGjx48gQ4ocSbKkyZMoU6pcybKly5cwY8qcSbOmzZs4c+rcybOnz59AgwodSrSo0aNIkypdyrSp
06dQo0qdSrWq1atYs2rdyrWr169gw4odS7as2bNo06pdy7at27dw48qdS7eu3bt48+rdy7ev37+A
AwseTLiw4cOIEytezLix48eQI0ueTLmy5cuYM2vezLmz58+gQ4seTbq06dOoU6tezbq169ewY8ue
Tbu27du4c+vezbu379/AgwsfTry48ePIkytfzry58+fQo0ufTr269evYs2vfzr279+/gw/6LH0++
vPnz6NOrX8++vfv38OPLn0+/vv37+PPr38+/v///AAYo4IAEFmjggQgmqOCCDDbo4IMQRijhhBRW
aOGFGGao4YYcdujhhyCGKOKIJJZo4okopqjiiiy26OKLMMYo44w01mjjjTjmqOOOPPbo449ABink
kEQWaeSRSCap5JJMNunkk1BGKeWUVFZp5ZVYZqnlllx26eWXYIYp5osJjKlhAmiWaeaEaapZJppr
PghnQWqSMWecCN5JJ0F64gkgmgjUeZCgAvXpp36GIkToQIseWl8CCEDUaKGTOspemxJVSqml7yX6
kKaMgsppd5heJCqjo5LnKUWnoprqd/6rTpRmpJ+2+upypWqkp62b3jpdrLIaCuygvPr627CSAovs
nsYil2tGy/Zaa7PEBdpRmqxmSiu1vGG7UaDFEhtRtNyq5u1G5DaUbrjljpYuQ+d6VOy77XYWL0bg
lrQuu/Vadq+p1qa07bT9ivavqfzqGm7CBStGr0IHr7Rvw5g9i1HEL01MsWQPQ8ywSfN+vDFeHSta
ckoLj5yYxQiLLHHIKhN2skEY/6RxzHzly9HMNS3sMs5fAXotzze9+zPQWhEd6tE63Yz0WpAybefA
Vjn9NFk1Z5r1VD5fLdbW40pdFL1iew2U0qGaZbTZWYFdK9pOWc123HDDzXWmc9Mttf7bZcmd91B1
2500zH8HBe7eZXvVdeE82c13XGszjpPjifdNuOQxPQ6v5ne9GzDmLyPuGLuVgz7o59+W/pbRqpse
uOB2sW66vIFvFvnsLQ/d+l6L4x622LAP5rfvJuu+u2DDE88ywq2lTDyfwAf/WPKFc76Q9QZfLvnr
ujn/N/YJSW9771eDH/7x42uNtPnEin9RBRWs7P3GlMd0gAghIBRBBBRQEIHD6isY+2jmvoiE4IAI
RGD/+rc/h5HPWAMkIEomMIH3WQB+FfjfYm73Kp2hK4IQkYAEJjDCiljgAvDz3+i0lar6TSQDGKEg
BSVQkQpY4IIaHN0DzeRBjfQwIv4PyMADHlARGcqwIvyjgAQaCBkOhgmE0LvIBaY4RCJKBAQToIAM
aZiQ+4ngi/hLIAbhl8MmBtBLUKQUzzLAxgxcwIoOAYEcBZLFGZrwhmSkjOy25MKNtNGNEHjIAUBQ
EBKKkIsSqcAU81gZJ04pjXYSXAYwwEY4TiSLWqRgDXGYmR06qY8FcQAbL0ICSlpyIgvM5Gz2yKTl
WQRjDniAA2ZpERKQQZQZcABF5LhAEmaEkJpxZJEoJyo2zlKXFSHBMY8ZkTmSYYGIvIgzg3nGIUHy
hwn5Yy5rmQENtBGZDZEjMEEyTmpW00egdIgGvCnEWq7Tm7RsyAHyNxIJ9I8zZP5DJ/deaMxAJrOb
8PRnTERoSHsFC0eurMgAlYmRAyjTAe+MoSYv0stoBpN06GsQMTdSAo08dJkVIShBLZJKLYImn2RK
p0Y6SkoyvJOZFDGiL0lagf5Z1KDnPJHdsKkRiDZAlwxYwERs+U4NxPOSRpSAOClSUXeRDkWQjKRI
jvlTBljVqhEhKgfWeVSJyPSmEUkqWO3lyQ7VjacdKWoHropViLD0pSawyBbH+pCS0pUMB7DdQc0K
yQIOpKgMUIEKFnBViOT1lss0QVy9mlSK1lSLdGVp+vCWoahGlSFFdYBgCcuAiTigAT+lpWIZu0WK
QjMhkiVrTiEkuFiBFrQg6f5mA8iwWQYQYCJFNepARvuQry61IkpECG9Dg9EIWXZYr4XtRySLVRvg
9qXgFIgJUruQ0orkBCcoDUoZ1NpWNaADHUguCWzJkROgwCA1qIFEXjrbgpSgBIeVSXZPU9w8vY5X
4AWvcskwXhJQtyIoOC9bBUIDiYh2sTgJMEHimz1ZFei4FcnvfglSAhPM1yI3YGtbY2ARBL9kASAW
qoIp/F/ilhU/xxVZeNubEBQEFcQUCeyABcLhigy3JPAtSIhDfF4Sm2uv+bmsXwcS4sJKRLAqMDKN
O+xhkLy3xDuGMUFujJrtPqpsl2XIAgYL4s4eWbBBNUgMagyRBRDgzAQo8f5CGrBOFhtEsU0uyAw2
K2WBXLh5J1ZPX7Msyq4ahM6EjbFVbaDeggBAAAKACJrPTIYcOyS5+4UzlRGyZRXMQMoouDNEasDg
TgL5UtEbyTL9TBAkE/YGhL5IegcCAAAEoNUOWTSaI8Lm5MJ5Igu4NIx7HBEarPozVjZPQllVwHV+
s7/+1XGgB1Joi9RYAAGIdrQ7fRACzGAGaL5BRCQ8YYlEmdcQIXODw1YeIWf0nbmMbqMVO99cF6QG
BXY2GRCN6Fc75NrYvu0NbpACcCckvxr4qUMcTeQ5FzkiY66yg8PT3YRBlNQLQbcDBGqQKIv5IjGg
N7QD8JB835YgAQ75v/5XrAGFPFnNgH4IDBJurjz/qrsXGbW6GdLNmSt7x2IWt0TobW8YNGTRZk4I
doeOXRBIILnRlfR7GWJqoTbE56+p73UanhGJO6AE48V6fy8yZ107/eIGQXRDop1oGuvcILL+ujqL
2gBJ43rZCoGB3BNSgxBQ+6RPpc6e0WZ1hGT9yRERrK4J4NyDsJwMrY42ABYibVgP5OwEufaiI6KB
DrTZzRiJdkFeMPeE+Ho1rHSOSjUicUEKhM0NobNAfg32jUtbIfVWfHzHDHl8M3rfEHmnwDXS6sST
4QUvWEgM4t28heNqnyHhqkQgrWUvD4QGkOewxu2NkADwnPoF+bycGf49kH6LPOKYv0jjWx184csm
9MMZNrFPMklaM58i0UeAxhefEI0LAOoHabZDMj10ksBA2oqnELR3EXfnL592LFg2ZENkAUN0AQ/B
duEXbmfHcwCAfwhRb4vXeehVeBKBXYoFAgU4EXLnc9a3cfRXECOoaqyHT3nXG+amEmw0RQz4EADX
bRMBedQHeQKYELj3EilIENb3aidIBj9YEWNGfCa2WqtEdSuBAZTkRg+AbFLYX4AHXgHnALdmhGRG
dppHBofXEF9YEDcAgh5hZtxHELQXhkDoagRhgTeohu5ifLRBTBl1EE5ISW8kSJ/1UyVHBpOGcAIx
fRy3ZBKIERDVh/4KAXQfB29ImBC9R37Ap4U6qF0uR1+j1xJO2E4Q8VOglXRxFm7zNn1oKBHa51kg
lYiytoKMB4DYFxFFGHUHmBobFRMHdFgPQHENAYFJp2YVN2uPhwAZh2hDSAal+BD6NxBKZhC4BFMJ
YW2LZncMMYIlqHjDCISD2IYayBAhqFqUVWWXWE/3JBDiRE8WAYEHwYsDoYgFwXNuSAbH6BA1wIEa
5nwFAVDwVGIhZ3sEoHaGFwMWSIGOGIC/F4kNkV51J4u2kmWHkWIscUgi9Fukd3mTRnDVJmsGkYMb
OBG4N48IYY/bdHLsFnnYxo9oCIfz1ooFMX4A8ALb+Hg00Ig/5v4xbuJUMOcS/WNdaRVwu/WJCSF5
Z0aSBRGG2kYRN4BkyVgQ0PVzKvBxJTmJDsGKFSh8Jgl6i3IvdUgyiaOQvdVLM0USf4gQ+qgAYCiG
CxFYQNkBYMYAETgQEHcQILaPXwdvGhF7KNmUuFEnnnKVdGFuepkQXJkS6FgQk+cQOjeUB6FhB5GW
jUYCI3ARaaeKF0GB1fiKF/FeLTkZNdOXcMGENVFRFUQG4iRHl0kGI/SZD7F0DIFmQQeP71hxXdZW
DTECIhBK6bYQBCBYaOYAo+kQc+dqbDgQlOmWCuGBioWa3LgqmskWDJkTYgWRDiFSd3WOgZl2m6Zl
dEaPDRFGiP51iglhab6IEUX4iCuZjQqBcwMRcpoGbFWpKP4yizIxmweBSXaEVDMUnQZBkWjncUCp
EPFYnteJEAzQAQoRAlNkTNFVYRZmXijgk/tZiNbYeHjlEFG2AN9Hk+dDM3qUgDYBnwfBlfYZn1/V
EdaWbw2qEByYmIOllgfRADN2EFZ3ciOBg7EHAByamiRaoizoELsSGctZE1+kEDcpQjFlRB/hjLep
kWXpZeRFEGppVWvpUsZmcxnhi/A2iQD5EIIHlxZKbnaiQxqaEzWKEF1Jn2P6ESpAlAIBUTCEEI3J
pOB1VU+qfEX6kwvQmtgIbdW4EEi2jwxxciRAbRQgP6bSpf4blIDJmZ1h+hFidRHJlZgWMWoJ0aYC
EVgqsFYMEJggIWt8anjkGRFvGWIgN3RZmBD2VKaAQTRD9jXuqRM2VBIhWhGQFn4pUBHfdFRWtWxh
Klhr1QCMKZuJChIoMKKqaXgZsQAJsGMh528MsainiqqHihXqt34+EQFkVAG/uhGvShG6Z4NkoKxr
F6XIOGDkGK6YF0YJ9BHzpY9BOZXb1gFeB1yp9KGQozSpGjSG+qwQMUYqNBI4SRFWGHAR6K0N4ZHI
9GJsNa4uYWGRd4aEmBHv1XQ4CqSPpUShWU5yAULRqhc9GhQ3dEEZ5KryqhCVZ3m7VxDp+YAGKhCV
xllkgP6wLUFdAGBtqyeXGTFcqgdcj2Wa4jhNq3M09ao4NVkUU3QBnEQSu6kQikWyNniyELFNpQZm
T4oSy0gQUcaUNdtkcBdTQRqyaEGv+Fo1hqoUi7SvOjFasWoQTOsQ05WYhIV1LyFz6UinEau2PIkR
dmW38NM2zvq1VPGCTEEBZFRGCzFIKsFb+cUBS1sRJ2ACuBSp18oR0HgQfxRPKdB1WloRHCBdn3i0
QBqvFhsR/uM/ghsVXmsYfPkU+jq6CeGc9hSOHFVhBJFfK0YRZniGJwCpCPG4G+GyfxWlDqBglraU
deZ+ryWdmNoQgBukoMmzDgG4KRSoUgFFP8sVnOkUNv7ksWQbR3MEnTprEcY5ZeC1ASUbEaopYiiA
Syl7ELzbEY9rdReGm3OLEGcrEIDHEac1EM7JENebQqTrs9M7OF86FSd0QdA7ESCQSqY6EQVotlFr
m9RJBgCVvgaxvh0hqQYRpViLncNZEN/VAYirXN9bEsyrEIqEQjX1FKUrM9VLFQTMtQZxtyBRt+Tr
kwQglgJhbE7rErYkY+d4EenJbW0nwzOBR66bFBj7v3r7EVo5Fc+bwBjxlRNRAzOQACNJEN8UExw5
EKPkwwbBbVBseiSBQaFrxP5bGH77FoNksY9lTxZhZnX2xeGmffnmXsdLEnaXxbdUSVzMwST7Wb8U
xv4dy0hEIb18279hSxeh+UxbWxET2mgboXO1OxCLKxP5Y5RtVUVDJKUOkZ6XN74TQVATBRIl7LGq
2xNeW8hQATtI/BQHHK8unI43WsdSqXP7CJe3lWkeMU8JpLsEUclp6WXadEoRoaxsp8kOMVevDBED
/LFCkcLIs8J6kbw2JREhl6XDa4QIkXYC+xEiMAIjsMMtSgbwqZgCEcwWcaZIuVVXeBHZKsrMbDPO
HBioozCrXBUp5MS7NXQVuqfxmxDBORDe+ZMrUWGISRDwCZsQ3Ea3eM4uus7s3FgjQcE3Mc8KtcRj
ccqIYVILBpJfvGW2HBHS1qnvNsUk+hGNmxAvxv5Z9GjBBrHFEToR5iUSED0SvCwTRwxAIlPPdfHA
DiGeCxFvktfPEDFqa1pxtYXQ30wGgcUQhgkRJ3AD38kRzPrJpdm9Bt04P2PRXSstyYLKcXGbJZ2d
UIkQA1gStarJlnyfBc2DEqGOHdHOYVWfCVHTLuGs08Mnb2Ma1TxnAq2NZBCE1LiuxcqwHuinJKBN
xpyih7nWCHGisWaRCnEAskxHMx3XlT0QdK0SGasuXr0VhCIqOl0XyRp5S1nDDvEC09iKIj0RtQxi
FXrB7DRLCBQRMnaU+Wen2exxVosQIVxdlx1HXInPM0HInU29GNo+oQFn/ZfNcyt35YeBGbjaE/4R
AjzdkbE9ECHwRSzdnb8Mjw8hrAyLWpN9RA9RsYTUVE3DNKHdN+KiRp8h2e8lxBBBmeLZjgQI1sPK
EBPnd8g4WAiRlk/aaTDZk3P8EPJdEYRbEKUq3Bnjv8UNFpWi1Znhj6stnnlKEQZJBjRsw7VkAozN
pBoshk3thbHmxru9EAeOrb/d4GVsTnSy2a1R1v481hj3kiJZxQwRRJp4mK8pASH+ECPulAJR3Q0B
xxqBSZmUzCCBNusNNdAjKA/+FzKuEAXwAnR54WA4lau5EJgcS5R21BDQgxLh2CSeiLq9ECU2WrNk
VIioEa2svCz+QVHO3lLV3rCRXjZ+2gIB2P5Y7mpdaJcJ8Zb7mKyLO11PdtiTC6BHPRCoFsXHuIVl
B8se16f/pVi4ixGhid4tweRzfhZb0+lyMU+4bRAwAHzlt+d1ORBC2HsC8c8FQd3luxDddMX/naLY
Sebe3YaIF4SRruH5xuEm91+HyFXGzBAhMMJKTs9yrl06Cup+4eoMAZXSXRB5ReQtzU4L7egT0YhQ
KW7hTekEkVttKU8S/TI74+xQ0yrorhf2DRFX7hC+ll40HLFthIsSAZkMIW7292pCDu69K6cQEURE
SxPEXXybQxu01+5PB3wIsAB4mu/DRxDgXYfQB4iBKIpe2O9oDrtQikyS7RAdy4AWkDnqvf7ukKOj
sDHlEvGKJpgQKh+3J64RB7BvIz6KoHjxD/94T1wCl651U7h1EExJGJCHdV3yc3gqTY4XL6nxcdeO
Fo6CKycTjd6PTF/moViN7NoQ6MuMCzFedwiFLEHIVLNKKF8aoj7qvNnuAOh40K7ACYpdFYHrOj+N
Te/nvynYFEGwxV4QX38B9k4SnN4tSP8b7CrtCl9e2DVixojba3+NBwHY/I4QxZh74BoRTkj0IKM0
aHWX6rIbL795774Srz3k3+6ONEsQ9oflochzVo9eyoZZxC4RQYQBI68vRi8cyJL0g1HxCmHqeOXw
qW4Rjbp/KJACNyDoWw52AnEA+w57GP4/if1JBhYHxg3RsQsoEgVvHOpeGwOOjQbheBsxv4oGdAJI
ZveHgQtxpRnPg43sVoe+pC0dg5g/NOd+fJx95/je6tOekwDbwNV25gBBRuBAgmRiDBSQEEBBhgIF
BGh4sCGZBSpULMDIYOLGgiQ8fvyIQWSGCw84npyYQCVKlgNXtoQZU+ZMmjVt3sRpMwHLnTl9/gQa
VCjMAydhtMSIMaYJpk2ZdoCqoUGDAyesXj05QysBAgtYxogBIEBCiDclMqx4UelQMiIxkIQA9OVP
lT3Z3sWbV+9ehnM5+uUbWPDgnGCPskya9GQJxiUmQu0g1UHDEygsW2a4lYACmAE8j/4VcJYmWNEC
LV7UeNJBhgwzRZb0WTcoYMK1bd8WbPekbty9fQcujTKxYoaNWUKd2oDl5RQCF3TlCjPh9IXBZ9Jg
iDoFCo4PHHyfbJv2Tdm/zZ9HP3N8X97p3b8/SXrmDBUziBcs2jJ5cpk3uP73iqUDplNIIOtkoqGG
jVA4wQTGCGKNNfAGSwCB9si7ED4NN/Qtw744BFFD7GpK676ZmOIAKg74i+k/AFsSAAayFjJwxJsU
pCgxhkCKUEKT+FqvpvJCJLJIClvy0Egl8QqhBhxnwswijAiQySmBUkROOaLI0GqG/2IiqyEbbbLB
huE4ykADDSQEMkn13FwyTjmFbP4JgTnvHCo/miobCMC1OLKSIcimkqkEBjQLMKYDcfxTpuEaZSjN
DBz4ES8L5QoST003/QtOMjLlNFShTDiBIBe7AtQElAiliTGuEpUJLIZqYCCp1ByVMiOUwrvLQk+R
/FVUYTf9Ndhhj21J1YLq8xLV4h7kqwRlbZKVoOFujckiL2GtDdSYhkQ23GO9/dRYcc8lA1qCUKhP
Ba44w6+2ac0a6FFss1UKMzSFAhcnctEFeMliAya4IXUF0tddKtFjKicbc13gXpsabOi7SXnFcDZz
C+YYvmI37vjOA0goSN8NG8ZpxNOUau4nxkgWCLwJdfqXp5pDxvm9f0HOGc9S3f474GCBVHVAzZqc
JEMthLkL6qM017yYpptRmrpnq9H7+Gp0f9ZrAq8LdawgmTGOyQbnCJo3KDWhJpvqqjfqV2u5Q9x5
7mFRvgsEECSQYAK+J5hJ3aI1kLkmBmr9M+yh1p4Uprfh5tluyW8bePJNFWdoAgooyAkErz+XgCaU
11bzOxIPR50M1vBas+2G4qY5cstnzy1r2pcUmqC+Keg7p8+9Dr0mpkgnnMThLPaut8dTkv1254FE
8vkig97od799/z144U1Y23Qy9EQKYgkpdV0v2IVcXnr1zfc0/fV72zz+62+yXnubHGjgOy0xb2ll
BnpsXO009j4CwsdOPCmgkv7itznAYY9vfMNJ/sCjHP71TylqGl+bmkeQ8yXQg5Rr3wY/uBf52W8m
evNc9m7SANLljwwws8nTMvCAuOTFfQW54Qh1SBfH7VBDEmBg73BSP5y0cDIwjGEA79LBN4nQh0/M
mM2giJ4Fzo9+KrwJ6cKDxJtwEVMDnGIYcVM5McKvhD4BnU9KNxAO/MSL/sqhQFRywDLWkTDkiqMd
ZUKBCgRRQw9gDQkqKJPBaSknTHyTHhXZregtMjALNCF6HvCAkjzgjTDZD6vIozEnOtKTCATlJ/cC
AsGAAHwoYc0kJ7nCTEYxNp0UZSz/AixZ4oWUfNFbTAA4wyxGRiqG/FYe8/5YS2K+rofFFMotgaI5
guRSJoCMEGxsAplfymSYw0RmNl1CRm3ixJRA6ZvfAOfMmfSoUjXRQFSAuRthYrOb7+TmO32TPQko
syapvKRMNNkpWLpTnvLEIyz/SRP5WbEm0LRkYK7pz4H+M54NRUkEKjBRnFTRhN9siSpVyb5+ChSi
EK3bRyMaAQpEgKQ3sehAUKhLc+JloR4V6UdtF9OGTHSiJa0oBfwGQXLCBIDnpMtCaTpUMFKNqASp
gAUsYNMIhMCpTw2BCKQqglNmLnv2ZClrLlDDV3YUpkeN6UNpeoELLBWnV0xjEnnpk0sVFaxvjU0j
j2qBslZAokPUKfCwxv5JuPb1i247avxMGgHs6bVDFQrqV/0K1mApdoo2FSz2DttJhi62ryGNaVJv
WtKnzqmdjrWsX2cKUQootY+EFQhUoVpVrF0ztK91qVjlqVnOyemlsMXtEmmZ2/PM0a28BS4PQxnc
bt2WuMcVLmCR2yZ+gXa5sG3sc2PLV+lWF45yte4hO5pd7vprt9215mfBO170YZe8kMOUc88L3NGu
V47tdG98aUJHo7oXkeqRb34TOdzuYvO++gUwB79r3f86rrIBrm5b61tdgSIWwQ/GrxSRW2Cb0RfC
Fx7wLNkrVAx3OMILfq1xPTzib2X4rRR2m3pJTF7MHrVCDV5xjG1iYf70DtW/CpZxjg18TJE2WMU6
lq9stYlidv4YyPltLzKJzM4jN9mVuxmyV5085U2yBMef9G1iqbzlJ2vYkUvuFJfF7F3+ihHMYR5z
mnVi4id69MBq1nF0oXjmifgKzneucpkTKGI891lqSVZfloPqZ0KTWc+0o/Pr3lzoLcvZef41MqOn
3OLJQVrSl04ulCvtY0x3Oq4Svlqi2RNpT4uZ0hwT9CtpXGpWz9i8AbN0q2WdaTQDjM+zxnWeQTwu
/+ba17T2srAgTepf+3lnxGbLi2dz5WI3W9ea9mysnT3tT4PaSMOmdrYH/eoN3Vrb3352sD3Wa3CX
G9g1dg+2zb1u7f5ye4zXZDa75U2nQ1NI2vPG93WVK57mIjvfvna0Qsn9b4JXe9dLVHfBFa7vfQ8l
4QuHuKEPDkeBxjviF5cajxmuZYx3vN1Wlp2D/+pxkh9S48DidMlVbnJ3j7rfK4f5xxtuzKDYOeY3
Z7meUy1znPc83HDbZsp9PvQuQ87H/iZ6wYX856Q3/dwf0i7SnQ5xUIVc5FPHusGhnvGsd10uQA+v
1L3e8fU0dtFjb/qFVs0etLfd4Vtnntvlzi/6ZkjUc8f71ttz9ryPvSd2sXnfBc/Juw/e8DQ/fOIV
v3jGN97xj4d85CU/ecpX3vKXx3zmNb95znfe858HfehFP3rSl9He9KdHfepVv3rWt971r4d97GU/
e9rX3va3x33udb973vfe978HfvCFP3ziF9/4x0d+8pW/fOY33/nPh370pT996lff+tfHfva1v33u
d9/73wd/+MU/fvKX3/znR3/61b9+9rff/e+Hf/zlP3/619/+98d//vW/f/733///B8AAFMABJMAC
NMADRMAEVMAFZMAGdMAHhMAIlMAJpMAKtMALxMAM1MAN5MAO9MAPBMEQFMERJMESNMETRMEUVMEV
ZMEWdMEXhMEYlMEZpMEaxLyAAAAh+QQACgAAACwAAAAAgALgAYfGcBnamRbWshzEvimjwkuUmWp/
f4N+fot/foB+f355j3hqtXBYvHU6u4YdrpgSqaINm6sCd7IBYLoAYckAg9gAptcAvdoCzuMG4OwY
5eAz6uVC6vJJ6utZ7t5q4N55z+5+xPx/0/1/5/6B9fyH/PaT/umd/t+o/tOw/sqn/rmg/qu05qHm
sIjynXv2tnL30nf85XT683Xp9W/Y/HLe/obi/pbb/qHT/qvl/tj+/v7+/v7+/v7+/v7+/v7+/v7+
/v7+/v7+/v7+/v7+/v7+/v7+/v7+/v7+/v7+/v7+/v7//v7+/v7+/v7+/v7+/v7+/v7+/v7+/v7/
///+/v7+/v7+/v7+/v7+/v7+/v7+/v7+/v7////+/v7+/v7+/v7+/v7+/v7+/v7+/v7+/v7////+
/v7+/v7+/v7+/v7+/v7+/v7+/v7+/v7////+/v7+/v7+/v7+/v7+/v7+/v7+/v7+/v7////+/v7+
/v7+/v7+/v7+/v7+/v7+/v7+/v7////+/v7+/v7+/v7+/v7+/v7+/v7+/v7+/v7////+/v7+/v7+
/v7+/v7+/v7+/v7+/v7+/v7////+/v7+/v7+/v7+/v7+/v7+/v7+/v7+/v7////+/v7+/v7+/v7+
/v7+/v7+/v7+/v7+/v7////+/v7+/v7+/v7+/v7+/v7+/v7+/v7+/v7////+/v7+/v7+/v7+/v7+
/v7+/v7+/v7+/v7+/v7////+/v7+/v7+/v7+/v7+/v7+/v7+/v7+/v7////+/v7+/v7+/v7+/v7+
/v7+/v7+/v7+/v7////+/v7+/v7+/v7+/v7+/v7+/v7+/v7+/v7+/v7////+/v7+/v7+/v7+/v7+
/v7+/v7+/v7+/v7+/v7////+/v7+/v7+/v7+/v7+/v7+/v7+/v7+/v7////+/v7+/v7+/v7+/v7+
/v7+/v7+/v7+/v7+/v7+/v7////+/v7+/v7+/v7+/v7+/v7+/v7+/v7+/v7+/v7+/v7////+/v7+
/v7+/v7///8I/gDJCBxIsKDBgwgTKlzIsKHDhxAjSpxIsaLFixgzatzIsaPHjyBDihxJsqTJkyhT
qlzJsqXLlzBjypxJs6bNmzhz6tzJs6fPn0CDCh1KtKjRo0iTKl3KtKnTp1CjSp1KtarVq1izat3K
tavXr2DDih1LtqzZs2jTql3Ltq3bt3Djyp1Lt67du3jz6t3Lt6/fv4ADCx5MuLDhw4gTK17MuLHj
x5AjS55MubLly5gza97MubPnz6BDix5NurTp06hTq17NurXr17Bjy55Nu7bt27hz697Nu7fv38CD
Cx9OvLjx48iTK1/OvLnz59CjS59Ovbr169iza9/Ovbv37+DD/osfT768+fPo06tfz769+/fw48uf
T7++/fv48+vfz7+///8ABijggAQWaOCBCCao4IIMNujggxBGKOGEFFZo4YUYZqjhhhx26OGHIIYo
4ogklmjiiSimqOKKLLbo4oswxijjjDTWaOONOOao44489ujjj0AGKeSQRBZp5JFIJqnkkkw26eST
UEYp5ZRUVmnllVhmqeWWXHbp5ZdghinmiwmMqWECaJZp5oRpqlkmmms+CGdBapIxZ5wI3kknQXri
CSCaCNR5kKAC9emnfoYiROhAix5aXwIIQNRooZM6yl6bElVKqaXvJfqQpoyCyml3mF4kKqOjkucp
Raeimup3/qtOlGakn7b66nKlaqSnrZveOl2sshoK7KC8+vrbsJICi+yexiKXa0bL9lprs8QF2lGa
rGZKK7W8YbtRoMUSG1G03Krm7UbkNpRuuOWOli5D53pU7LvtdhYvRuCWtC679Vp2r6nWprTttP2K
9q+p/OoabsIFK0avQgevtG/DmD2LUcQvTUyxZA9DzLBJ8368MV4dK1pySguPnJjFCIssccgqE3ay
QRj/pHHMfOXL0cw1Lewyzl8Bei3PN737M9BaER3q0TrdjPRakDJt58BWOf00WTVnmvVUPl8t1tbj
Sl0UvWJ7DZTSoZpltNlZgV0r2k5ZzXbccMPNdaZz0y21/ttlyZ33UHXbnTTMfwcF7t5le9V14TzZ
zXdcazOOk+OJ90245DE9Dq/md70bMOYvI+4Yu5WDPujn35b+ltGqmx644Haxbrq8gW8W+ewtD936
XovjHrbYsA/mt+8m6767YMMTzzLCraVMPJ/AB/9Y8oVzvpD1Bl8u+eu6Of839glJb3vvV4Mf/vHj
a420+cSKnz3eKlMe0wEihJBQBBFUQAEFK6tfMPs0c19EQkDAAhaQDPvbXwQcRj5jATCAKZnABCxC
gQpYUH8LZCD8bqUzdD0QIhKQwARCaBELWMCC/GvMwqh2KPlNJAMwtIgEJUhCiljgAhicXgPN1EGN
9DAi/g8IYhArMkMaVqSCFcBfCkfnPTF9EHoXgSEML/CAiYAABBOgwAwlkBD6ieCL9TNgCC5owQxC
ZodaeiKleCZFGFbxIVcEwUC2OEEbmrCMk5Hdlly4kQtgQIpvbMgB5EiQEY5QhDbEwAkpwEXK3K5K
arQT7P6YgUBSJIFGtGMSK+Y/KfGxIA7QgAMcYBESkIAModQABTHZSNjokUnLswjGRklLUlLklLW0
ZUSumEAttrIihMzMI49EOVFp4Jii1KVETgnDWkLkinPUokagabtODimSP1QIMpNZERKkUgMZGKVD
4iiSYGqGdOjb0Ccdsk1lLpMMyAynQw5gP5Is8Zyk/vNRJMGXAVFehJnHFKdMQsjIewozWDiKZUUA
eEqMHMCboRRoRURYx4vsL5OcIVs6GVTMjZRAIxClpUVCSFKL9nKEnyEbjCIpyY80oAMdKOU3uUmR
IqL0iCiUZmjQySK7ZVMjDQhqAxhAVAa8s50yLKIEyDmRCvrSXfk8EUvFF9QOFLWoETklMiU6EZti
JIuMRCRUrQmiuv20Iy+FKQOsilWIfBSeotSACSZKR5Mm8JcGOUA1yZohhbJqozDtgAoG29aH6DWX
DjDBXCViU7xKpJeMTMhb07fBC01VgAbRgFoJu4AGTKSdpFQsY5VqUf099SCTtRca5VS2VQ2VqCH5
/qhnGTDUBNzgs1vVpWgf0limNnV/jiXDbneKUAhdVlNXHWpsDWKDz24AmQYxQWoXssWRnOAEpVFp
gwSHrKsStQQlMGVHToACgTBABUatQQ0kElDhGgS8ep0Jdk/D0zy9zlaDZatRB2JKEky3IihAQVGV
SwYaVGS4NwkwQeI71soG6LITOa8KrOpZ1JrgBOddQEVeG9T9kiEGFlksTAgwg4EomCDgpe9q8XNc
iwgWtgrxLkUkzFaCgPjAIi5JCRgskAUQgAA+TkF5Ufxf0tQ3Pyxt6Um86+GIqMABHSDwQG4sERIP
IMcgAe9/f/zjBWi4IAhGjXbtw13MEmSwCyis/pMnzIDbFiQGAojIAH48Z+lG5KUcWIhisUwQEs+g
ywWZr2teCZ99JrkBGgiqQgaL3jbzeCI2WO9AABCASgfAIVyms0B27BChKpogew7zQWYwAxUAWiAo
EHREavBoTvI1PevsCC0bwNWCMBq2N4j0RdQrEEsHAABUVsgAZjCAORNAIp4OaqglooI/E0ABqJ4I
DXid0qiix6/Bat02ad1fUxa5IJK2SAwCIIByC+DXMWh1QYZNbAIM4AZudkhghWoRH3t5ASeOSLB3
umLuJNnM23YnGUqg2BPc+8sDqYGBxW3uSj+E1HOGNhngLWSGzLvCDuE0QQ7uZYnEYN/ukpV4/srM
L0Rj/CEa4EB7E+JdhE/5Ig0PAAxg0BA6/9ggAc45QmD6aYVo+b8LQLOXm7wQGHx8NYTOzr8Z5oCg
1rohK08Ix4kukKNX5NwAGAjNF5LpmyfkumC/bhI9DeY9p3jRQn/I1gdd3OuQ/CKIPqbTwevtbltE
6D5W94cL4uuFAIDSlJ4yyAfiZy4PICLbbkCo+cwQFXScITNfu0FqEAK9e2bM0jE00QIucP76V8sQ
YbSXFZBrhFjd14FPCOqDPXiBkJrL8IaIZuV+cpC8YOYKmTbS+32cWGdk9omGiF7j3vihJzzcbyaD
ubGu+pgDm8EfBzmp/3z4icfb4h1IdOcp/kJpmYtAry94wUJisPDmiZw5mheJ3JHt9No/hAaDh3PD
s56QhscZIbovyLMLImSda9P9FvF3Ahh+4jd+spF0woFtbTcSMSR7tAeADzF4AoAA5yYAkmcQ84d7
CIF8DZFqYEcSqEd/CRF9F2F5jrSAx9JamBVEVGRJDJF4F2F1BFFul0YGF2gQImiDNygQNdBcE3Fd
igUCJhgRM1dp51ZpOUgQkbdr1KZa59cbS5cSGXABVDhEnaZyiaZ4GLFv5OZwewcRrWd9MLGEAkGD
v2YQZFgRH1d+/PZqs7F0GyUQGUBJldRtdthtWoZMFbZn4nZjZuiFMtgQgVgQNyCEHbEA/n9metEn
gUhYEDsIhoNoZE9IG8UUhwSBAZg4hS64ELk0EKKmb8q3fDkYhop4EanEEF4GZC6ncGx4EH/3awDw
fQSohpGoYm5oLr7HEpm4iQtBayIFaoyHEFxmY8t3hjYmEflnEC53EJ2oEF23AOrFgapnaX9XgBOR
hq9xZLtHO5Z4EASkV1SEeKAFZt+mf112bAMxgeZ2g8n4EBxIVGm2jAORW9s3EKXmbNBYeZAHA13Y
iBKBjQsxhJQ1LrgYPSuRRQQRR/VkEe3EeOUoEF3ndb12bgJxg9LYED1oXjJ2ENskSmdXEAHWbKZG
AFRnEB+3dc6XEN1HELOIkeq1kKYR/i1JhhgtthIUJUK+hRG5xYcFoXEHUXg/JnGmN3k+GBHwFnT3
VpJwFVC29HMF53qlBmQKQYIFQYNJSBACWI3hJ5AfRgOtaC7XMyfd2DlR2BJKFVwZ4U6fmBCvJ5Ej
uG/XhxDyKBCil2YJsVUOgYiKSIrG6IohaIPjV4usISx9MpZ0ATszCREnhZYfsZaj5mxxOYKEKHUH
dxBoRlsP+RAcRxAKhxG+BouP+GGC6UppMyiX93YysZgpkZmEl2kROJkHwXFzaXwDRwIjwJENIZs2
EGkXSRFmeJUVqYEZAV+nqSmG6RaoWRN31UpxdEVcSVER8ZEJEZHu2JsDgYgzUJkO/jECIjAQo0RT
Ukdq90Z5XOkQMGCVSQiQEgGEiiWdlLUqx6kWNYkTNHRIOdkQJFVDD+GeBtGWUumOjddstPkQYYRY
aOd4j5cRS/iKfycQtxeafZaIIBlgqgYawqIo/tJRM9GdBgFW1dVVW8SYCOGTj4mPq1aUlnmZCHFe
SolKVGgB4LlpBUdeQieUfUgQISh+XKmKHdd/QwZVlXKheaSCNsGhB3FRGAURNnVTG0FiXPajEIGi
BoGg7lUQG8mRW/Vz/EkGCRqDBtGPvwYDRqoQPpZpc2mhrbIrkTGfNPFFCcFKRFREIHFsN6ACE3F9
qpQQDaWRV1oQuQUSiIiOZKBw/hL4mw9BAIPFZWeaUXoUn4pTZjoxpgeRpKNVnxjxUnlqaxRxW7WU
qQVxmwMhYWkGY1hajxfBcU14EPMXEdPnlpKlZSTwaPuzMh/zJoyRnDjhpiPRWHBHdppKEQZqXo43
EKBKl4TFAHamErI5grjXl4dqoiAJdjyJECIUWYVBNGb2NRrKE5IKErxqEclmEClQEdskT1yalAIx
ppcJbbbJnd0KqFF5b0N5qguQAPeWc/nWEGeJPNjqqFVTlj2RPxZEBu+6Ed9KEWmVhe4HpQ7IlD22
mTCpEGFkQB+BXYOVnXZpY6MJETMAU/J6Sb20VH7xRNkaNCpYsnaFP2YUEh/q/mI8B4AM27AChXdG
FbEtcWHGSqXHqBElcLEf21SmFVnNaU5y8UEKqBdsChRktEkkQbQUYQIXdxAVinjmSgZ1WbMykVoD
ql5f+bRzVZcUhEJMKhD32RZKg7JdAbBEcUMnxLQjUZ4KoVjJVntTG522JnTBqBL9ZKXyap0TMVw/
W1NgpZ91cbb+WhW4WhQVgAEXcEIrixO7BVMcQG8EUbcPYQL95Klcuml7yhLNeK5Dt6gS4ZirhEkY
EQFO1Tb9erhcA6lMcUf4Y1hOSxLDdXF0q5nZORAn4ItPJxDcSRL6yIzNuKwZ8Ylw+6ZBOwHU9FsK
9LhRYbiGAYdPcUEUELvj/rS8AiEBs8oR4IVlUUsRm0kGvNu76Qq8dxlPDhCSeAeuUeaQW/pYptVI
ZcsQS2tQeuNB0XuyUVEBd4RHz0RNBEW4FrGlitUBk1sRsolvmQtO5GuzHlGwS5lM2BV0CNqivRiu
AwF6HAFcBTG/CcG/bWu/S2G4rPu8rjsVVIhCznu9rCSi84QQpKuZeKdhC1y1BuHAHlGsfnpM4aRL
aecQFTq3GcyaHYG9C8G/OOS2TAG9MpO4UsG2SvxYkOXCB7YRFIyx88jApmoSnVsQ4UTEClGhgTW5
nhXDqem4Kzw2q3ut+rsV1moROTW2E0FiZbcRPZgAGCsozRQTBMcAA7pp/hghxhdnxgxxvBRRv2kc
FEwsPCfsFoNEtE71xhORikB2bIQsiO3Ype+bEvrIZAMhRRcxtTCVaJoLTCQBwm2byD1BsiX8FNJL
F80pEMtJxdNppmAsiAURvieQt5z8sOgarBRRoU0nVFvsEBRVUSDxovqjxh7UynQDEmgbFbwUshWB
qIqaEVS5cRyXah5BTwYEwQVRT1dLBlL0ixTBsHEnd8W8EPkpViABxUSxyIHxyn6RU5LcgTlHaiMp
ug4RhuIZuCMhAiMwAnuKlATBoaLHANDWT+V8dztMe19FWiOBw00jz4CBOgoTzVeBRGEVt2Dnf/bo
bDbqEA6nngQRr11q/hIEZ3Che9B0maCZu8cVYad+mn20FtEtGxIUfRMYvVCJaTnNnBiSfABOacaK
ys846I8JoV54rLMfsbeUGb5koMM7bK6GrLsxu344TamjtRDgPBNG68x3IzIajRcRidQDgYQCmBDl
B9AbkUsZIJc0S6xdTBBcFZkNcQJ4bbAhOlE3mRBfnTk/89PyKS3JItZvQWIj+Z8SW4SoZ5Ib2xHN
ZM5TiqDLCF5+jNR7HcZk4JodcbCVekgIEdgu0a/TwydvYxo5N65tidTx9QJ/OIqkCBHaCYQ/523x
ZMN3+8d8Co8KIaUdSJ1ddMsCAdoRkUU5PRCkrRJHqy6IjRWEIipl/n0X+Kp/zuYQ4ReKWEd/wokR
shmzBAFaBCR1cpmUFjyofotzwv2qSirRuwQCmCTHRUPCeUQzJvPcZ7FnH3gRM2eNZOBrJk0RIWAD
xHu+DCwQIfBFVI126MoQ6U0QKOCfgsrevMXVCTG0cuSh8k0TaDPdZ9Eod0LYfEHU3bsRJp2VwFkR
B7CbPpvSCNG7dY0QCa2Uj9a1CNGq+9cQvFyCTnvMAgzWRyPih3k++D0YMRDg//3YGRGNrid0580Q
JDBXUj0QCZ0QsbezDJEC0OoQO/7ZSIrMgh3kRR407ePhi5HNCOHY1BiDXlnZLs6MMh2b9yYBaG3l
yccQZjrhDHHJ/hhxUmBe2kxj5mwhKPEy5nuB5glRAOFHbkeY4kleg5BNikGn58LrTHJ+bw+wAJu9
EMA9251tpj53EMN1ihwB33CaMfR9eYYNRbHBtTZ+EP7dhY6O4hrr6ducau0JqyTQRuRbapYtEKUn
Ean6hWzpbK76Xv+1Z59rEbF8V6i+M4aONcMS7W9BTw+udS35EJ+ZdUg+ECFQA2Xq1lUd55WNxQMB
3A7BgWvH6Cfd2gyxpalk6RMRAkYME6xM7X3jEIKeGN2+EGAKABC6YBDZbF0muuhrqk59fNLmiDDQ
fanneqfWEO7ZkeRbyDv9MtCeGsuC73gR8AzxAoyu1LkXjTWA/qim9uZ+Su7Cfu13ntardxHSSfES
8QCMy4ssce/mtzm0EX0enxAwsJUigJ5TSX6VDWQjPRLwB4rpWIzA5ukLUeJLOUpE/RCNa0JWCOgZ
T5rqAhuIToTdTQa0HulkWucRcQDwttlOj+XFCOlpH7cf1YzhdYd2J4d/VPNYj79veCr7jhde2fZp
/oiwuNbB6fciEexi389Lz3yChxEOMNkVTxCmNAKY+EfhyNyGy0IHqO+mYe0srxBfj6Pb3u9lf2H7
DWlTmdb39/c0p/hvRvhefPAQMflTCAEoE+gcj7R6/xsbG36xXRIfDd4KMexKCPaWxhC/Bov41/mv
z8PrXBCY/lj5+qI0Z4Ubua8bXV8QBdiPjk6uDAHSLtm1fzmNvhaGyh/eDgtEmGgB0Z/1wYEsez8Y
Sa8Qs0g//OisGeFpMdX9KJACblamlP5yAEFG4AEyAgwKCBBA4EKGBQ8mBBCjIcMaNhgyWIBxYsMM
DhyQIbhRpAWSFh48EJlS5cQELVe+ZNgyAUyaNW3exJlT506ePcnMhAnU51CiRY0e1UljJQwYSEU2
gBr15g0CVasuSBlDosAYBxEqTBngIVitKW+cZZA2rc0SbUuQIKEyw1wMF1AidVk0r1O+ff3+BbxX
pWDAhQ0f5llDcUqmTV8SmEGgpwkNHTRIvWnVKtasC70G/gCw8mHohVtFYlS7Vidc1q1JYICdwa5R
mbSFIsadW7fh2yl77wYe/G9IxjUXXJUM08Ry5svJdIB+ucEJ6tUfz4hc9WVZhwJIvwTb0HTDAwxU
qMio+ihsDLIhECXcs7Zw+vXt04y/Mf99/v1zanUMJs0W4Ewkt0pIqQHoOoBqohNQgBDCiSDLrsCl
AABALAHGw0krDgU6TwX1UnJAgww0uIm9u3iaD77f/IMxRt1e1E9GG2+c6MPrsiPAQoHcoklBzFSK
MIWFINOupoSWjMgnpRo6j0AGVvKoyo9w20+nFnHkskunsoyJRi/HRMzDnLBT4aqJiAsyqgZpOouM
zZJb/okgrxAiQ8ebaKghJRROMKGthhyYqyOPDksAATFzApNMRx/FL1JIJ/3ryZwgVAG7HnViTkHo
hqRJM6tg6mo0rizdqc+FzPORDNdO1MDEQwNbFKctKcU1V5FqXYhXXX9VKYTFLkVBoM2Oq6k5hhZ8
E6aQKNyMps++IwNVnWyw4Ya00lspVllptQ1Yccf9iSYEyEVXJTZvepAhUVttSNmNmG2ArRKgTbIm
PCdSlacDbCBQyilT8nZWvhTVq9F0F8ZR4Z98ZThikUw4AUoe4RXIOZjqxaktTTe9iTuKLDJvYJwW
iFLK4BSFOKiWJYa5P4hfjplhEyZKAU01GwKysBJu/uZJZIFSG9GmlDPazWH8lK656fscZtppcQVt
qFjsImt13cKA7mk8ok2+KUQCi+3WNpoHO1tqtYObee2YqV5Iwhg15slSlNFTSyeMFBAIUJE80sDg
naJ+iXC3D59xacQXPiAuhuSWke6dnhQ7LSOJasvxhawU3KZbWTR8cdERbXt0hivu7wC4F+I61T6j
TAtyolprwNvAr/Q8bd90N733wBT3XVzU/5qg+JtWz7jEzmuyiAz1Wj/K9ttr+nzw0IPH3i+lec/e
PsmRAgEEMiQonvyOEdycc51ucF4FhtB3ynbcV7p+V+67xx8vSfMnE/6JJqAABXwCguIVUAI5oZv8
/uZnk68JRHPxC1zh6seSCfLPgi4C3gVthDyGSIB8HvRJAQ3IqZspUG+pAVyJ2Ha/hlRQgy/0Selg
6B/VpSSAAZwACHkiQuPtZDka2ECsDqW1l6AsPerLTfW05MIZNnGJLnNil26IwwP2RITm4wllpkcG
/9FEbCWS1fK0x8IwRdGMujlXUM5oIwpU4IYTIEr5dLgTzn2kizAxD3psZ6jCKJFRTFxjIKnnK0AK
0ihvrKJOwkdAHiYyJwU71ANtkhEwfusvhXyYITXJG+pt0j4FpMAcd8LDHPJEeh+RJE4g2Rc/2gqT
noSlfmZGxljqZIqhHMoVe2K7BqBydnzB5Ctr/jnMFu6PmIdpIxXj2MNdCvEjHPil2RKWxmNW8yhQ
o6U1V5JMCpTSP7MiwR1X46JsZlKb57ymMdGJlBvK6AFzuQBceAIVBnVgKOVs5Tr1eRMZ7vMo4jMM
CIgokpMU9AGprImbmvVEDPrToTHM4EMHGFCA0qRQsjnoTjzlpj9mU5gSRWfLyunQivIlfDi5aAYy
qpMFMWihUEwYSGUqn37OFCcCJQr5CiiQk6L0oivKiadcOkiPftSm+qzpUXOTQw+Sr6Q+VSlCbcIs
l+FzpEp9KDaxutRG9uSdGZBnH6161a1KNKllnUgEKrBWK77RmwvBKU1OYhegAjOYZEWrWc+a/lcy
UCACf42AAHniVoYssiYXgGdBWTlWvjZWSxFt7FrX6teeILKKPa1JSmdzzbs61rMMLdxnS7LWCITA
tKc1rQhUK4KBLuSKEniqRX/6HnJK87O3ZZQ60WqBC1iAtFbsqk5+ShSEhQu3x82tGh1LkgoENoS6
3MlcaAvRhOEVuVvVKl/96lfn7rCbb10hNWlq3euiVaR5baNkKQtcR86okEYtr2O3h9YKMNeNpT0t
pN4L3/h+dpZl5e1kGYJa1LaWPvnkZ38VHFPlYtW3gn3UXcm74OP+l8IHTpRxL7xh6oaWw0mU8IdF
LB/IjvhLI+Wvict7XhXjhbEthvEfdRtj/hkzmMY3TjBMcUzU6u7Yx7mb8Y/LWFshFznIFDRyr/ab
ZCbDRLz0KzKCc9xkKqPtyCZ+pZSr3GQLw1jLS5vwlj9cXA+rGMVPFnOaB1PiBX9ZgmhWc5ztd2Xc
ulmCcsZzJxu84hfn2c9lpl+YY2lntAn6zzeer2cTheJDN/omcJYlX7NMZkdXOtB6xi5nLb1pTENZ
qYTenaE5HWU2I7Wzo0b1IOl8zBCn2tWdVgmlrdkSSHf01bcG8p6HCerd4drXU/b0oLMs6l+rucua
vGqKi/1nFgeS1yJh2bKlbStYN7HV08Z2ru88Q1prONvf9ly1u/dsWRIb3I5u9rhRbO5z/ls60dgb
drvlzaJVSy3e88b3Y3V8OHJTkN35RvW77Z3haQLc4D2pdTGddu+DN3xwpSbXtR0+8eTqelz9ZgnF
NU7vejtq2P/eeLG3B3K8yFo+Jg95yoEd7AgzXOUv1/e+u/RxmNccdOKOkcRtvvOKAxpGGFc4z4X+
cIivkLMkH7q8BY5hfKI86U9fuW+YrmmoV52mMkfMupFu9YOnW6yM5nrYO+xzu2pd7Ge/OtZtTGS0
t53jFh/vUZzudrqHu+Pb7nHd9X5zJ3OP4Gvfe+BjTnYJrlvwhydxx4Eepq0j3uYjZ/lQou14yo89
8gLpNuArv/nBB3vxSuZ86GM4S7OL/t70iSe89U6/esvv6p7KZv3hG+X3v8fe9qivUedvv3ui5z53
jee92/cjUtgHX/QvSjjojb98vWTcysyHPnzES6PPR9/6QvlN8a2/e6AIZfLbB7/Zqh9+8veq/OdH
f/rVv372t9/974d//OU/f/rX3/73x3/+9b9//vff//8HwAAUwAEkwAI0wANEwARUwAVkwAZ0wAeE
wAiUwAmkwAq0wAvEwAzUwA3kwA70wA8EwRAUwREkwRI0wRNEwRRUwRVkwRZ0wReEwRiUwRmkwRq0
wRvEwRzUwR3kwR70wR8EwiAUwiEkwiI0wiNEwiRUwiVkwiZ0wieEwiiUwimkwiq0YMIrxMIs1MIt
5MIu9MIvBMMwFMMxJMMyNMMzRMM0VMM1ZMM2dMM3hMM4lMM5pMM6tMM7xMM81MM95MM+9MM/BMRA
FMRBJMRCNMRDRMREVMRFZMRGdMRHhMRIlMRJxL+AAAAh+QQACgAAACwAAAAAgALgAYfGcBnamRbW
shzEvimjwkuUmWp/f4N+fot/foB+f355j3hqtXBYvHU6u4YdrpgSqaINm6sCd7IBYLoAYckAg9gA
ptcAvdoCzuMG4OwY5eAz6uVC6vJJ6utZ7t5q4N55z+5+xPx/0/1/5/6B9fyH/PaT/umd/t+o/tOw
/sqn/rmg/qu05qHmsIjynXv2tnL30nf85XT683Xp9W/Y/HLe/obi/pbb/qHT/qvl/tj+/v7+/v7+
/v7+/v7+/v7+/v7+/v7+/v7+/v7+/v7+/v7+/v7+/v7+/v7+/v7+/v7+/v7//v7+/v7+/v7+/v7+
/v7+/v7+/v7+/v7////+/v7+/v7+/v7+/v7+/v7+/v7+/v7+/v7////+/v7+/v7+/v7+/v7+/v7+
/v7+/v7+/v7////+/v7+/v7+/v7+/v7+/v7+/v7+/v7+/v7////+/v7+/v7+/v7+/v7+/v7+/v7+
/v7+/v7////+/v7+/v7+/v7+/v7+/v7+/v7+/v7+/v7////+/v7+/v7+/v7+/v7+/v7+/v7+/v7+
/v7////+/v7+/v7+/v7+/v7+/v7+/v7+/v7+/v7////+/v7+/v7+/v7+/v7+/v7+/v7+/v7+/v7/
///+/v7+/v7+/v7+/v7+/v7+/v7+/v7+/v7////+/v7+/v7+/v7+/v7+/v7+/v7+/v7+/v7////+
/v7+/v7+/v7+/v7+/v7+/v7+/v7+/v7+/v7////+/v7+/v7+/v7+/v7+/v7+/v7+/v7+/v7////+
/v7+/v7+/v7+/v7+/v7+/v7+/v7+/v7////+/v7+/v7+/v7+/v7+/v7+/v7+/v7+/v7+/v7////+
/v7+/v7+/v7+/v7+/v7+/v7+/v7+/v7+/v7////+/v7+/v7+/v7+/v7+/v7+/v7+/v7+/v7////+
/v7+/v7+/v7+/v7+/v7+/v7+/v7+/v7+/v7+/v7////+/v7+/v7+/v7+/v7+/v7+/v7+/v7+/v7+
/v7+/v7////+/v7+/v7+/v7///8I/gDJCBxIsKDBgwgTKlzIsKHDhxAjSpxIsaLFixgzatzIsaPH
jyBDihxJsqTJkyhTqlzJsqXLlzBjypxJs6bNmzhz6tzJs6fPn0CDCh1KtKjRo0iTKl3KtKnTp1Cj
Sp1KtarVq1izat3KtavXr2DDih1LtqzZs2jTql3Ltq3bt3Djyp1Lt67du3jz6t3Lt6/fv4ADCx5M
uLDhw4gTK17MuLHjx5AjS55MubLly5gza97MubPnz6BDix5NurTp06hTq17NurXr17Bjy55Nu7bt
27hz697Nu7fv38CDCx9OvLjx48iTK1/OvLnz59CjS59Ovbr169iza9/Ovbv37+DD/osfT768+fPo
06tfz769+/fw48ufT7++/fv48+vfz7+///8ABijggAQWaOCBCCao4IIMNujggxBGKOGEFFZo4YUY
Zqjhhhx26OGHIIYo4ogklmjiiSimqOKKLLbo4oswxijjjDTWaOONOOao44489ujjj0AGKeSQRBZp
5JFIJqnkkkw26eSTUEYp5ZRUVmnllVhmqeWWXHbp5ZdghinmiwmMqWECaJZp5oRpqlkmmms+CGdB
apIxZ5wI3kknQXriCSCaCNR5kKAC9emnfoYiROhAix5aXwIIQNRooZM6yl6bElVKqaXvJfqQpoyC
yml3mF4kKqOjkucpRaeimup3/qtOlGakn7b66nKlaqSnrZveOl2sshoK7KC8+vrbsJICi+yexiKX
a0bL9lprs8QF2lGarGZKK7W8YbtRoMUSG1G03Krm7UbkNpRuuOWOli5D53pU7LvtdhYvRuCWtC67
9Vp2r6nWprTttP2K9q+p/OoabsIFK0avQgevtG/DmD2LUcQvTUyxZA9DzLBJ8368MV4dK1pySguP
nJjFCIssccgqE3ayQRj/pHHMfOXL0cw1Lewyzl8Bei3PN737M9BaER3q0TrdjPRakDJt58BWOf00
WTVnmvVUPl8t1tbjSl0UvWJ7DZTSoZpltNlZgV0r2k5ZzXbccMPNdaZz0y21/ttlyZ33UHXbnTTM
fwcF7t5le9V14TzZzXdcazOOk+OJ90245DE9Dq/md70bMOYvI+4Yu5WDPujn35b+ltGqmx644Hax
brq8gW8W+ewtD936XovjHrbYsA/mt+8m6767YMMTzzLCraVMPJ/AB/9Y8oVzvpD1Bl8u+eu6Of83
9glJb3vvV4Mf/vHja420+cSKnz3eKlMe0wEihKBQBBRUQMHK6hfMPs3ui0gIBkhAAgqEAgiMQARW
Rj5j/Q+AKZmABCsSggpY0IL7c5j3XqUzdD0wIhKQwARCWJEKWMACFlwgYxZGtUPJbyIPyMADHlAR
CdpQAhaxwAX0p8IVNtBM/h3USBAjcoELzHCGFLGhBHFYkQiksIeNuZ2YPgg9jGTgilekYURAAIIJ
IHCJCaGfCMZYvwIO8II8jMwPtURFShENixm4AAQewkUQDOSGIqzICVFYASiObo1VeiFHMIBFLTbk
AHYsCB4rcgEMoDCDk5EildpoJ0M1oAMNuAgJYmjIJCKQAmCkyAn7eBlAMkmQBWmAKlVZERKQgAwO
cEAGHFAREHxygrGRXZOWZxGMrXKVrYRlLIcpES6S4ZZMtEgiMyNJI1FOVBzogDRZSZFXZkADGrgi
Lem4TDKE8iLGtF3/iETJIS5EmpjMZDXJgE1sxtIhdRRJN5kZLCGh8iEa/ugAB9S5Tna6c5sLOYD9
SDLPipHOR5QE3ysx8koSXHOWNPmkZ0iHvgjxsiL/W+hFDjBMYlrEhhlZIgntRVEaPXMjJdDIQz1K
kRC69CKf/CJoyAYjSlbyIw1gAAMuyYCJkKCdGnhnEpWYTIrk75YGq+eK7GZOjex0p7+UyE/bKdSJ
KHGEdSyoQzBIgaJ+hqYnsqn4dJrOqELkldicpQlqSFSMSACBI3WXKTdUt6Z6RAUquKQKyhqRlHbU
AWsd6gi9OpGYjlAhBxDnOOma0IqSgQEd2Os0+fkQjmrznSYIbESuStiIxLSrCUkpZ8CKIbEG0CAk
YIAKVNsBBixgIkAN/qpAMrvZq2oVIkcFZWfJINqJzpVBgvOUa18rkt6SIbFkuIFEHEBVgJKBtg8h
alYr8snOQjc0JYWQaSul0+4SFyTGFYgNYPtPg5ggvAoB6UhOcILSkHZBwRXVAuY7XwactwSu7MgJ
UECGqNagBhPZpmYHUoISIFcm7T1Ndg/U2GXhlb49JYgrSYBeiqDgl9SkQUWuexMU8HcgB34f/AZk
WongVQXzVUBoTdBdykYkmnwVSAwsMuCZeLggBVbwbx91Uoo8OMIJyalOXQwRaapgn5Sd8YZrPBID
E2QBBIiyQFLwYQJX2F1KzY9Nb2oSaQ6ZyA65pAM4sNOCKBkiA0gz/gE4DN4cEyTKUYaycgvCZh3L
Cj/xdSxeW7vT8VJkn8klCAACIIAAPATOaR7Ac6+MkEtygCGZZbJA4AxngyTYNbqMT4PF1gANgJkg
KkjBahlwgxuEeCI2ALBAAsBqAADgzApJdKIJfOpGm5Ugka5zQQgwA0oTBAWXjkgNal3KLF8qeiHB
8EL2CuQbpPoi/yV0oVsNa4TMYAayloiycy3phPC61wT4bpUhQoP/zvSg6bkoq8SHzV9OeMKMHoiq
LSKAek9bxsQeyABkgG0CKKDUc2bIJSf7aYfwOtwEIMONJVLtcy82PFs+rTQ93QDnEjiz3QWyvDVM
73qz+iHZHkip/ql8zsn2NcSUXkAKJhKDhid1xLAqm/U6rQGJTJyaCMm4Tg/icoh4nAwwCDpDEK1o
g3j46AZBJ84VUmA3D4TXKoDzdxsCg5avJtPaiXjCVumAgiekA54uecb9bOZqE5rQCxl0AAY9EBgo
hABqjnLRE8Leup9AAxCQADDpHGmnH+TalX6I21+zYOvk2SI0X2XT8Uvhd1dkzzpdgKkRcmZWrx0A
C7H82s9s9YMM4NoDkHJEgKpKbncbISoA/NQTEvTBH6QGIci3b+9MnU1nhPReJ4MrF/+QE+88uWQv
Oxk83uqESHvaryZIz6/d6wEA/CETpzhG/L2QFwg9IeW++o6L/nPP27fb4gyJZVBrrpDuFsTcPLd3
8RFi73uTIQYHbnnD+02QUjckn2DPvUQMDXQRJPYFL7AQMcBxzUN7uMI9H9FO+mcQf1URNOBy6icA
C6F+AeB6BpF9DEFlSBdkC/gQagcAbgeAASiAsoF1w6Fu61YSVzR6QFVVLHcQApAAhnZ97Ld2AkGD
BjFvDgFsdScSrvaDADCCCiF/G2UvxnYsMhdAM2REncQQLQhYF9F5A3F8NwgROEgQNRB8EMFemQUC
sicRMKB5Nsh6VygR/6WD6QNzu6F1KFFEF2ABSIRP/6RrEVF5lsd271eHCWF/L9F6ZHB261cQfmgR
LUeA2LV9/s1zeCmRAYSURe/2iI/YdO40EJFGiDPWfgKAeTLWc5THiTfghRxBXwkhf1IoEB7nagZh
gSxXiu5lgLTxTI5FEI0YR024EA1IiaeHEHCnfJioiQPBiZ1YEV0XdgtBX/N1fjRgiAdhef13ACJY
EUTIGiaYiMgGE1dESLW4EGnFUrOVi/oWers4EAIQA/bGcxKBgU92jLamSl1XjMbobGfYEEAYhABY
EYMIG4VnLtETiwgxQAdgRBFxTdsIfuc1dJQ2d8OXABIYA6pIBuj4EDoIYas3ELinEAvwYPWVarHH
EGKIihNxjwzxhaOFbqhRYioBSQJRRwNVEe2kVpIWb2Tw/nngiJCpmIMTkYVkYIzqaBC413QHoVoo
Nl8BN4QMKW2B+BDP2BBnuJKmES1bhhjbtRIhBFLxpBHlVYk4JnvMF2UqNoQ5qIUOcQMXGZQTKRA0
52kAtXiZ1V4YqXE8V4rE54sG8YECIYIiKWPJSHjXMyf8SDJs2BJ4NAEmQYd/B3gJxxCsOJQGAWWi
92RtGWwEoYANsZNv6XJnJ5cFMY9BWIVECYypISx90pd1ATtPiVtfdFiD6Y0EEXoK0JgkWH+6CGXz
dZigFpSLhhHD5ZZkUAPKuH+aB4Jl+IusOBt14imiCTmKGBO3hJonAZOTRmm0iZgFoZjPKXUNgV8j
kErY/sQQOkdqNpBqaEgRxDeGBwGSF1Fgd8kxsXKcbpGcM4FMBJFVoMgQ6vUQfncQvAaOBLByDoF+
CZF61vkQIyACAtF1FZd7OtlTsJeeDWGUHkkQ5ikRXJhZ96kZfFkp7KkWUYkTXtRVITRdEDFYceUQ
FUoQWxll48YQ4VkQqRd11HcQZSkQ9WMB7Jh7J1Zf1GmPQXeHBGF9DWkQrvlrHgaZX7Uok5KhatNj
MkGgBsFZgnVDJ6cQhqkAKaqiYAlqvcYARBp5roUQaZUBNAp+JbCWN8oAXYkRUjiPz3iXjAllU7aB
coWhRkoZ8WUTTGoQp8mctdVWHSFlN1ClDXGlB1Fj/hCmmxRJVby1eOElihoBax15g3fqbSnHh+7V
KruiRkpKE2OEEB36TRLBpyBxAyowEXPGXLKFEBo1lhDmpd93ErxpdnEZnPgJnTFKUouDpF3xlzgR
qQfhqZ96Q4J5Ebc2EKNKqn8FfgKRncRKloZqlsi6EcZ4AP5ZEEZJng3xbYHHEItHAiHmRRpkKnbi
Qx9RmhqxqSPhpIinbKDGkv+0TW06EMpKBmV6mynhXV06iqcoEYZZljx4Alh5ECLUVcEqMz9zWmOx
oTzBqyCBrhURTRuwdwPBn+RVXilHXJGKYkBGAiMwoAoLEgk6ihcBZxJAXEe3cA3xVqCkp3/xQQYL
/hYomII/YUIyKhJEtVvQR3BGRxFPSAYHF2cCwZQKUUYF9BEngJELoJvRWBFwJk3hJrGeZVgUcFux
ozQtGzRJWLUY4UR9VAEkUZ8WgU4PC36A6hCIKq/7+rMyYQJsiZFnKmMaQQB4FaCFxVXBKp9TW7Dk
ijWZChRoRAF+BBJSCxEmMHAQOxBEChFOB3VRFmFA2xK99WPyxpsakVnX5qIXwVWEVZVwQbW4WhW6
ShR7hEF/6xEMqhCZhWEudriIu2uip5rNWRCuZQOJtaJLJhDghhHVlUcYYUJcuxWcexjuWRQ69Iak
tBPQhU5IVhCqixAXSRCm+mn4BROmClBcygCC/joRhEldn2WzDqFACYSSVMGyWMsVn5sURYRCo4sQ
iKQS14VO6aS8DyGRZHB3XeeCBDGgJLGRB3Gsj1Vfv5cRula6nEq3EhBOE3FBCVQ1RzO+vhu8SpE/
fYQ/3FRQEswRBcZkJkcRHwt2rYoQHdsRjXuoQRVLKKCqR9usEfGSJepZ+gNaKWnAD2FCfAS+euNB
huHATIFGxTvBA+G9ETCwFlGi2Ru/bYkCpPesZBDCHfHB/vRPJ2DCKNwQDfCwLuaTGwFXBqG5DaFD
fJS+ScG5nSsV5QsVOnRBXrwQdfRJEcC9DpFvQ9x7bQlLCojEStwR8VoQOyuvGBvF8EsQqGtl/ikB
wwwxSi7cFL9LsFd7FVy8w0YVU2v8Ea77EKIalBEmmTChUXg8iQORYltYEByAZKz0xjBxVGm0FOIb
xlGBw1TxSLjLVWdscI0pyv0puzZAmYkqE2OakyiGYxgBmUpXepGMWCQhw2b8xQuMylAxxmuBSAWF
uSErmwsgy4j5kMYoECucEhtpAjopYb1cEL8czGg8zG/IykZBRQyMFVqHzD8BoscEVwqktNC5EQ13
wke7AP4qEyupk68lfkjsEJBJuO3oVrgkEov8yk1zzOpsyIlzzk+RxjHFxm8HbkG6ii6XoMtbEQJV
QExcEANlwkfLvxWRon98EVM5oh8hAuhL/hSHjDyqnBdcVcgNUbI3gK3hFoUJ4dF8vBEisLGYbBB3
arQMIJDaZBHFKsLSdxEMGxJ1nBPmnNBMgToKw9BWgcBnrLbsBacDYZjR6RCWJ6vi1aK2XBJj2l6M
2ZhMeqOvBVQQ9Xh4zMEVhxFJDRJLbRNQjVF5e7AInRgJLBAHoJainHJbnXZAmBD/Ja2UHBLbmRAo
IHXfFa/1VaAtSUsCTBD7lcnEiNSgKlhB2xPi6zDhyjymQasP0ZGYKRC9KRIdJakpl6w9fahrHWgS
Sp0d2BA1axElvVsbLRNEc9do4SYU5dRuUWpaXasy2nrVaq1JaxFhvb+3CKRx65rXbBA5/roQ7aVc
NKkRcR2imU0QuZ0xeDs9fPI2pnF0/HmiAVWXAKh+vjicFZGb9uyv20phJRBbSJx6vbZ6LFbNCXG9
ih2TvhZGzqlI2x2ieUpY3R063w0ZhCIqUm0XJTurxD0Q9WiKhYaKXk2qhaqNzVXHlruY+k3YtIsQ
/HWQCxHdTTrgDcFFnTrQTA3GkUQzJgPcZxFpPXgRQSeEAuFql/ejFBECNiCWQK0QTxgCY3TH7rjN
CxHiRgd3+nndOBbgd+SrCiGfiXSaEO0SaNPgaiMubvQZfX3BGxGhq3Z5D7pR3wnkZHl/4NfazBvk
BnFqp62LoMeVDQHOEbG+Jy6iRZPX/sUW477BkBcehr+JEfG4rBhrESSgWRcZ2HpsmwdBqW7bECmw
lU6OEHaOu1ZOE02tWHTysq+R3OV54+NZ2lPIf5SXlwdx6OH3UAixX/OVAMvt6HtoZg4hkxNtupeu
vSl75frCNFrOFoISLzLeF6COEAXwjIBY5gOh48r+fuydjsvtvM1dEGX9AJJHEWDpmdUJd4xuzYNa
Y+S3EVwEn97N50bIZRAUG/+F6g2B41NI6mM+2M6u7TnJpcBGoU03YVjEjW8GoOEmefwN4rT+dtBZ
6daMXpUYS7PUz/BUlTKF5b4+7EnK4K4hUEouiEkZER154T+bhWJpjFHckq+9a8/9/l0BT9iCWBAo
p9VtexArDNITEQKCDBNNLfG97RC/nhhijpSjfkjiBbfMKuTN9Z9Rd7RYePEIoYx+KG0mapgkil4C
mU322xAYgAFzrRJZbvNQY6m5weNIGYDqDe8DUW6FjtZOKPUMEaPT6hCW2Wpyebv2GV5qzfAH8QBF
lI2h40Fa357qsvd0IX9ezxAwAID043aaN4oDmOqQaxIPqIcEcXyWR+9Ml8sCQVUSAOUC4YZwiPcn
kfW5hPOwUexWGJzzWHaS3xEH8HyU5/gUrt55eBEFKcdBlQG8BYmPCK+MeI2cTxKeT5ynkvN4kYyn
jxBeTdpAV3Uy4WydePqw1n6m/v7siFsC054QrpSdVU9IAIkynNtCJQj6pWHxSC/4gf+H07Z2HH/n
Vs1eFcHfp++Hrq98w38QQr3wEHH9YDpHnR/x3fL7vwH9ZCCCABFAgIAAAQCQQZhQ4UKGDR2egIgC
hUOKNWpQhJFQoACKCDMW5NiQxsWOHTWc1JDBQcmGGDBcYBlTZgKaMmMiqGlT506ePX3+BBrUZ4KY
RIUeRZpU6dKkMZyWfJEQxkCDTDWUlDjRpkUaDWHAAFAwbMmCBg86JNkTpUqeDy5ceMCUYU6kdOXe
xZtXb1K7FPvuBRxYsFIaMaC+iHpARMa7DRw7ZikxxQ2FBGYQcGg44QGEZcV2/txIsCpaGwsZqOjA
8qQDzjovWID9IK5cmkaP1h6cW/duvLZL+uYdXLjurh2/Dn4M2eYNygScO8+smYzTgdVHN6xOFcBT
h8wpMwAP3mYJ8iVIkOg4IgOG9XCZ/gUKf/h8+vURyl+I3/5+/iUtpmXoK8ZYeg4oE0xooAMNktvp
OQcpko6M7AoqacKEImzohvDC8+k8Dz9EzyX23KtLP55M7C9FFWkrakUXXySjNYx0em6BBWI6MMcc
EeqgxwUbgCjImCy7zLkbIZTOurMoUlIhDDez4TTUOGRKxAwugOA24ILCDUYvv9SyqC3BJJM+pwYc
0kECjmSovBJK6rED5RI6/iEriRoiskCWjpNwIKCcepIMG1QgFLwGSmpgwZV0EnG2n7ossUxJJ9Vp
zIYspTRTvQIlcAYValyoPJsS/PFQirJKQaEZimSTJc8ACAmo4hYiVAXxOnIg1wZyzQ3FSn3VNFgw
fQVWWGN1AtSnG1bVczOekpuzJOYQek4BzEpqzbqCONVppIYYaACFE0wgryGUFA0sAZyUKvZYd13E
NL935/VpVp7uVIHVnnQ0Ic7HdGJOzWs7os7CGOz1CUCKQDzv3F33apclSOmluMx4Fbq4YnpDsMin
O6mtsdWOdFwoTg6ipUhGgQeQKTuCEkK4JxtsoIyMDUvSgIPVFr0r4t8y/tY46P6AJgMBoY+Wkac6
F1JT5IVIdshfU2Mqlwxmm2WpyYQU7ukAmje8laKTHr5r3RKJPjpt+ohFW+20TTiBoavXdOjAUXkq
d9Uid/JzoRpKEypKsIPDqe2f3Ub8S6INT5xeExiaTG/nFAi16r1KMGHvnrhTSEMqeZKyg88H89mv
0htHnXSgT0+dUssT0ooMrBFKOrDHhcIQbAZ8qnUBcFniIDUtGTe9dePhnel4oV8n4+MU7Q7KXt1/
KpSBcSmClkvii1e+e/4W3957Fw9ATyHnVYRe1oQIFT1socgrXyFop/41/LlYFz//9xbXv+K4+TsA
88hwO6B0rFbhiR1S/kCkgR6dDGUSs9/9+jfB+oCPgsf6314mMIGdCPBxDjiJTwBXvQHqRWr068jE
tBfBC7ZQKMBioQt5kz6GUEAoIAABGSQggQ1KAG9vUkiuhKgs2ikEiHeRmpjYFUMZNvFRyXMimI64
EB5SYAI2BAoONziBHfpwJ+kT4hCVdZrdISR+SJTTz5hIBhVG0Y2AgeEa38gUASZkizsUyhbv6BO7
nUsDvOoJ2E5yxt3gT4JzRCTpoJhI+wSQIhSAJCS5mEc9enFfJjgXW2onk/DsyjEgLKQhMSZKRpZy
JquToynlEklJWvInleSggVDCqylykn3z65UcSalKXrLEaC3qZYoq/lABSLoSKHfEI1BAOMRayoR9
DkNhb3bJxmkG05qXQuU17SOBVsayJzjUYiWDEsZcEdKZhGLg2KK5vyVq0509s0kq38kTVk6Sknv8
CQhn6QBz2oQB6URXz6bZxnkWVHunNKhuWEkBY/pEj/b0iT531k+dJKoBFH2hLuWZUIPyj6OCGWYr
kYJPoGhgA6shAwcUuBSCDkVdH4UpX7IZU70Qk6EqmmgzO3S2dtLUp7dZ5E+ZYsUVPSADGfBQUMBz
HqDKdKNC5ahHobqUHAYGBJukiAOMKhsyYJQlgztopKY61vgglKxHqepecKiTo8pGq14tyfR60tK5
PvWsH0WbXWma/ta7rJWtRwXsA+BKEQYswFajM6tY77rYugaVsTu5KlJ4uMGE+JWtJ2mro0BHKN+5
T41OfWxo5+pY0QqmizucgGV5koGUZECwQDlgGT8r09LWdidss61gHtrQ1bqWqbD1LDaXqNfc0lSq
xV1IBEIqlEj2kCGRlYlRfQuxalYTuWSF4XUVEskIdDcozYUoGcBpE9mUV7PsBK121QtMCKp3mO/F
4k+ai1qEqDYmgG0rbapL3PVCNbvXhY0FQhoCAhe4wCJAsAiwakdk2lcm+HXtcCXcXwrHk7SltcBb
hhmBe/aQt/cFLImEYjbaVtjEFmZvbmFTAe8GZbdACWxdJnxi/horsb25ZWWLXynO+dDklxnlb40Z
m9fcvpeYHHaxc4VD1xMFWcih/S+GBXxkA4eAUgO17pPXa0HRZljAN01IlQu84LVVV8tnftRxGbvc
TO3XyWguLpfhzBsf93TOdz7RhfEsTY2+ec/IlfOf9ctSPwv6ukQ2tJ2Hl2hG/0rPjY6nRiE9aRTf
mNJiWiOTL73p+6iZ06NM76dF7ZfEflrTjh51qjvyY4lx+tS3VXWsU+hpQ1v31bIedaD/fOtTFhrX
NSbxb2rNUlb/2tiktjGceQ3BYh/b2cJNcY2XbelnVzuFj1avm6297VYne8tY9jW39xxlQAe7qeJG
901KXVpb/ps73e+GdrQfm8oswzvWtMYuuO29b2yD+qzTPhy/Be7ta09V2wNHuLwd4u6E1pmnCYc4
wZHd8P1G3OKVFvY8AR7wi3e829QOpjzr7XFxI5qXG6dI4Ui+8n5jTJUHZ3nMQc69NzpcsTLH+cd1
7kKUO6TnOSe5yS9o63ADndvk1h/Rjb70PCv8eEpnetQrte7U/fx+RZf6u5GOOJtrqdlZB7u6nR40
qIfd7LCWeMVgfna2Yzzjard12+Xe9LFriuhYn3vC43gsdemS4XkH/M4LfuWyB97wU6c6jO5+eMY3
2e3w6nPjJT/alg/H6nOZfOYpn/Ye03vkmmf71pdc3b+D/t70gvd55z1/eta7lPNwJDTeWx91ocMx
7rPH/VAer1/Pyz73Wd+7QGP/e+KXtfL1W0rpi7/8ussrTDNmfvQdfxP7vVTR0sc+3VE/2xJn3/ub
3/7Vh/998jf29fdJ/ufLT/zad/rraV5//LlU6cvnx/fyz3wce49//r/w+InvvwBEu7eLD/UTwO8z
keqzvgNkQP+bOO1rwAg0vktpsvuTwN+Tj7wywAvsvzF5P/vjwBBkF8ybNRE0Qb5gNUupvxNkQfRz
QX9rwRhsKttQORm0weFZwRvUQTbawR70wR8EwiAUwiEkwiI0wiNEwiRUwiVkwiZ0wieEwiiUwimk
wiq038IrxMIs1MIt5MIu9MIvBMMwFMMxJMMyNMMzRMM0VMM1ZMM2dMM3hMM4lMM5pMM6tMM7xMM8
1MM95MM+9MM/BMRAFMRBJMRCNMRDRMREVMRFZMRGdMRHhMRIlMRJpMRKtMRLxMRM1MRN5MRO9MRP
BMVQFMVRJMVSNMVTRMVUVMVVZMVWdMVXhMVYlMVZpMVatMVbxMVc1MVd5MVe9MVfBMZgFMZhJMZi
NMZjRMZkVMZlZMZmdMZnhMZolMZppMZqtMZrxMZs1MZt5MZu9MZvBMdwFMdxJMdyNMdzRMdnDAgA
IfkEAAoAAAAsAAAAAIAC4AGHxnAZ2pkW1rIcxL4po8JLlJlqf3+Dfn6Lf36Afn9+eY94arVwWLx1
OruGHa6YEqmiDZurAneyAWC6AGHJAIPYAKbXAL3aAs7jBuDsGOXgM+rlQurySerrWe7eauDeec/u
fsT8f9P9f+f+gfX8h/z2k/7pnf7fqP7TsP7Kp/65oP6rtOah5rCI8p179rZy99J3/OV0+vN16fVv
2Pxy3v6G4v6W2/6h0/6r5f7Y/v7+/v7+/v7+/v7+/v7+/v7+/v7+/v7+/v7+/v7+/v7+/v7+/v7+
/v7+/v7+/v7+/v7+//7+/v7+/v7+/v7+/v7+/v7+/v7+/v7+/////v7+/v7+/v7+/v7+/v7+/v7+
/v7+/v7+/////v7+/v7+/v7+/v7+/v7+/v7+/v7+/v7+/////v7+/v7+/v7+/v7+/v7+/v7+/v7+
/v7+/////v7+/v7+/v7+/v7+/v7+/v7+/v7+/v7+/////v7+/v7+/v7+/v7+/v7+/v7+/v7+/v7+
/////v7+/v7+/v7+/v7+/v7+/v7+/v7+/v7+/////v7+/v7+/v7+/v7+/v7+/v7+/v7+/v7+////
/v7+/v7+/v7+/v7+/v7+/v7+/v7+/v7+/////v7+/v7+/v7+/v7+/v7+/v7+/v7+/v7+/////v7+
/v7+/v7+/v7+/v7+/v7+/v7+/v7+/////v7+/v7+/v7+/v7+/v7+/v7+/v7+/v7+/v7+/////v7+
/v7+/v7+/v7+/v7+/v7+/v7+/v7+/////v7+/v7+/v7+/v7+/v7+/v7+/v7+/v7+/////v7+/v7+
/v7+/v7+/v7+/v7+/v7+/v7+/v7+/////v7+/v7+/v7+/v7+/v7+/v7+/v7+/v7+/v7+/////v7+
/v7+/v7+/v7+/v7+/v7+/v7+/v7+/////v7+/v7+/v7+/v7+/v7+/v7+/v7+/v7+/v7+/v7+////
/v7+/v7+/v7+/v7+/v7+/v7+/v7+/v7+/v7+/v7+/////v7+/v7+/v7+////CP4AyQgcSLCgwYMI
EypcyLChw4cQI0qcSLGixYsYM2rcyLGjx48gQ4ocSbKkyZMoU6pcybKly5cwY8qcSbOmzZs4c+rc
ybOnz59AgwodSrSo0aNIkypdyrSp06dQo0qdSrWq1atYs2rdyrWr169gw4odS7as2bNo06pdy7at
27dw48qdS7eu3bt48+rdy7ev37+AAwseTLiw4cOIEytezLix48eQI0ueTLmy5cuYM2vezLmz58+g
Q4seTbq06dOoU6tezbq169ewY8ueTbu27du4c+vezbu379/AgwsfTry48ePIkytfzry58+fQo0uf
Tr269evYs2vfzr279+/gw/6LH0++vPnz6NOrX8++vfv38OPLn0+/vv37+PPr38+/v///AAYo4IAE
FmjggQgmqOCCDDbo4IMQRijhhBRWaOGFGGao4YYcdujhhyCGKOKIJJZo4okopqjiiiy26OKLMMYo
44w01mjjjTjmqOOOPPbo449ABinkkEQWaeSRSCap5JJMNunkk1BGKeWUVFZp5ZVYZqnlllx26eWX
YIYp5osJjKlhAmiWaeaEaapZJpprPghnQWqSMWecCN5JJ0F64gkgmgjUeZCgAvXpp36GIkToQIse
Wl8CCEDUaKGTOspemxJVSqml7yX6kKaMgsppd5heJCqjo5LnKUWnoprqd/6rTpRmpJ+2+upypWqk
p62b3jpdrLIaCuygvPr627CSAovsnsYil2tGy/Zaa7PEBdpRmqxmSiu1vGG7UaDFEhtRtNyq5u1G
5DaUbrjljpYuQ+d6VOy77XYWL0bglrQuu/Vadq+p1qa07bT9ivavqfzqGm7CBStGr0IHr7Rvw5g9
i1HEL01MsWQPQ8ywSfN+vDFeHStackoLj5yYxQiLLHHIKhN2skEY/6RxzHzly9HMNS3sMs5fAXot
zze9+zPQWhEd6tE63Yz0WpAybefAVjn9NFk1Z5r1VD5fLdbW40pdFL1iew2U0qGaZbTZWYFdK9pO
Wc123HDDzXWmc9Mttf7bZcmd91B12500zH8HBe7eZXvVdeE82c13XGszjpPjifdNuOQxPQ6v5ne9
GzDmLyPuGLuVgz7o59+W/pbRqpseuOB2sW66vIFvFvnsLQ/d+l6L4x622LAP5rfvJuu+u2DDE88y
wq2lTDyfwAf/WPKFc76Q9QZfLvnrujn/N/YJSW9771eDH/7x42uNtPnEip893ipTHtMBIoSwUAQV
5I8Y+e2yT7P7EQmBAAc4QIFEIAIUOCAF9sc/X/nvfymRwAQmUBEB5i9/CXSY916lM3Rp7gIZyIBF
JEBCElrEAha4YAQYszCqHUp+E3mADGVYkQnaUAIVqcAFUphBFjZwTP4d1EgQIxLCEF7gARQBgQ0n
iMOKoLACCJzeBsP0QDqJrIghRGJEQMDFCVDghgihnwjGWD8CDvCCUIzMD7NUxaX9DIRF1GJDuAgC
gtywiROpwBMrsEA1rpFKMBwIAxhwERLE8SEHqGNBlmhCilxgh3ykzO2q1EZKLWqQg7QICQaiAQ1Y
hAKgZKITL8DHFVbmj0sKZEEwiUmKkGCTDohlLJMIylDi0TWya9LyLFIzBqhABa2cyCbJEEJZOmCL
irQlRhSZmUkeiXKn+iUwMylMgXRSAxmYpUO4uMhbVoSbtlNfkSpJhiEypAPT5Ncwr5nNYzKEjiJh
pmZIh74NqfIhm/6kpisFkoFOZrMhB7AfSeTZTNL5iJzgG2YhyeCAdtYElJ+hJ452WRH/KdQiBzCm
NikiQQpmhIQTkKBnyFZPBkFzIyUQyAIa0IGKsHOjEikhSC9Syy96M33wcxE57VS2Bqy0AUBtgERI
8FJ3TmSJIaVpTW/KGYmuyG7m3AgDghrUobJThDVkJB0J6hAKYJACTG2qQU+0U/fNgKUd4ABQh8rQ
dpogq2C8CAaTSppciqhuUf2ICtDagbVGpAQadcBbj3pHjNQypGEVyAHCKU4OUZRVJSVDCaTZgalK
5AD+LCYZTDBYiCA1sQ+pKVgTklKxyupMJ1XJMBew0hTcYCJFFf4IZyPyWa5G5Kt0NUhpR4pKk5Yt
UQtQAQFIslsyLJYMr43INTtp1M12liG1hedEvApKps7WYMGKUFk9xVoCsJa4AmlAJ8lgA9hq4JjP
lW1xFRLXjIzWICc4QWnI5iDBAYsA+PXuAk5gghKU4JUdOQEKqCrUGtTAIumVbAmOKxP5nsapB0Lo
1gjwy/wuwCCvJEFK0WqRAWuAqgKhQUWuixMUoIAgDH5fTgW03YjMYAb5XQiBLaKCDnzYr2SIAYJv
YuKC+PfBvX1UaiOiAhh7V8Yzpgg6VfDh5upYIgMYgHNRsmCC4JcgKTgxQX6cGgjjZ6c8xciFZdyB
Mge1vEp2QP4DCEmQAAhAAA95c5ThTOKQ+He9C8DvhW+QXILUGTX0vY99ATiQMve1ASdGs0X6HIBG
AyAADomypKW82fUqhKUcaAhnE0yG/Or5IA7GZZDPI2G4sVSoCjH0Wvmc4onY4MBuFkCjAxCDJytk
ADOQNJwHUmUkV9Ugm/5zQTx9ZYKgINQRqUGrK5Zd99xzI0m+dHNv8OqL1ODNb260QGyNEBnIINcD
IICiG0JgVAeb0wh5sZHHLBAtR4QGBgZNoNHz2GBVrtz+zXCGd1vmgxzYIrGWNaS3veyBDODbURYI
n/usEA6UWa0NEPZDXoxfBbTb3RDhdmjsKh4wu4+vONZttP4JUgMRVwTbkIZBpAcQgIQPhM9ZTgjI
UQ2RXndazwtIQQomUmtAnzY8gw6XeD0ZEVXT/CDlRojGyRBrhjxa1gKBgdRvLWkCUNogJs56QR7e
gOYq5M7FJfaRIQKDnptr1NDxOL9G3hBVmxIhRm+ADcY9ELMz3dEAUMisAwCAvA9E5QjB9aQbEt/C
b0ADEJBAyAcSbC4bhAAU//RDAI/LZl8n6BXBN9hf+d8MK9nMa2a10gWSbUcnBNsCt7vdCXJwcA+A
7gzRgI1vfG6Jp5vi7F6I1ClvkBqEoOARHeuvXicy2Xdy8Qfh/J0dMN5Ug/7lsN826mXt94OgXts5
JsjSyf7w4nBbfOEOKfONvS4RIzPkBVNPCLxXw/HmPNsisrcx8heiUYYgP97WR73eUT7wHDO41hpn
dQbBZ+f0fCABAyKwWC/wAgsRAybXPD+HK9zjEeJ3dA5RTDAlETSwdCgHALyXf3mXfgexfgyRZVqH
dPNXEY8WALtHBgvIgA0oG+0nHPVmeSFhgQ3RT/6UgRKxdG6mJiLIEEFYEP/2EMdWeCHRd0ooEDCo
EAB4EcB3SjZ4LL8FQA+QATQEES9lew9hd3vXfx+oe2EoEDUQfYTHXyYAAlEoEXvXd014EC1oEQZW
hKa1YruhdifxSDMkRw1xTbPEhV1IevxXdxGxfQrHcP4sIXWNJnB9hxBxWBG19oAbh3asoXYlhUVY
qG+auIn+ZUyMB4gMUWvTV305ZohKZ4o3oIZk5hAMkHsHAYB2V3qkSBBjmHGrN18RSBvQFFn8VERH
BBGB5WfodhDh5nKkFwPY9oqFuH3FJnO/phCs5G80IIltRn1+h4AH8IKQeIuARonu8n4pgUV82IfY
5FAFAYo3h1/GSAbY5oHK+G50mGfeNVwoCGIJwUqZRG1z6HSOJnXaSBGP+Bpedna0w4sHEQJQNI7k
iE08WGkLMWnr6H/bFoYkCBH/5mnfdRCGdmMKEVystQAM8Fqv9nsLMWtK+IYREZALsYZ1OC5nFz0x
Qf5HAkURLzVluqUQ6iZputd7E1GGkGdkY7d1XNcAYGcQ0sRaIYmIp+hmJjkR/8gQcziTphEtYMZA
0cOLHeVR0oURDPmJCWZzBtF9zZgQS1eGCjGWAwF5whWUBsF1zQV2nHUCvwSSFteAZsd/s0gQK0gQ
L8iS2zaNAnk9c2KQnYOHLCFTJGRbH4GOBhdlBUCPdlkQSqlS8phnRrlux4YQKWgQIGmXGteBCdF3
fOd3MFiLdceNzbMo90KYdAE7VfkQXtReJcGY6Rhuk/mOL3cQxOaKAlFx6nURwdR71KiXfBeaJgkA
C6iS2oeasVEnnsKacGGJMlFTuXUSlvZ4k4aWTv4omY8HlJC5EP81AgRxagyBjwo3d/hXEV/Yd6ap
nBXhX37JMbECnW2BeTThRco0EFuliguRlR7lEI6nm90XbgWwcw6RngehbpL3ECMgAmTAdgaBjyFJ
Br4XnyUpi444hBIRX5sWoDi1KvSZFtsVoghhSxKwn7TFRKB1EB5aEDOAcMOFcVC5EJHHm2SwADNg
owJhARlgAc94EL40Ta1IgBoBA9nWiHypoRCRdcgmb6qpKP4yZDHhoAbxWRSBVNXZEGAZlrZJBjIK
lWbYmxeWmQTxkRlpEPHXoxbQoiXAWdKkTxlhdqJJmgtoXAshj99pgl8afJUiLJJUhTZBpQYRSv6i
RFhLJBI3sKcMoWjNdxDPZaZnKpSHJhBgF6DTxBG2hnduGHWCihAYSQDgN5Wtsit+dJU3MUYlmp9X
KpsWQZ4EcQMqMBGv1XVAxXwIsVpziZRwZ2YpUXLcxpSmp6SPR2xAtjgkyhWGiROdOqgTdBF3tKLk
Zo8DEauymnTpOBDiKRC/lKMLQKYr0YrkdQAIOhClx3emGZbe+RCbl2IQtTIf8yY+9BGvqRGoOhJW
2qpsR63mdXxCZWGQma0zUGSd6ZApwUpEmn/UFxE/uaAFcYRoiG4klEBvJzM/Q2hjMaI+sawgca8V
YWgQVxAGCluz13ViNxAaSxAkMAINerIeIf6hTjhrE7FudZJ1PdZVXzQBByQ8RGOxYFGDU8gTVMqy
GsFIGDFzWOdSx9dp6SoQUqkQZURAH+GRwbmcptgQnjZVMDddonWiihk7SsOzQVOFYIsR+JNCQrsR
HZURJjCUR5t5WLWwQdm0LWECcjmXcLptGaGWHaCdt8VH1SUQKFoXVeSzeYGxRFFLOTtQamsC1joQ
TfpXuxV5Xsq0MlFadluXFFpyGuFLQClXGMRUW7k6RzO2XZGsRKFHF9RDImGhCsFZM3d0j6tcROeo
M1FcmWQDi0WHGMFZkYe5FIG4jXQR+BNJW/G1x0oV9nkUFrBDPMQTJGZ0BRG799hKQHVjOP4oWRfV
EiUwu2TgS4REbRtRZzoaEVtrWKB0QBOLvDtLusU7aE2BAZCUvgqRSCpRZ9BLENILpPjIAdZ7vWTQ
oCRBkgihZtXbvdEYvpzGugjxVWAVun2rQlUzuscrFdLpFMsLRfjzEA4sEO2qEf6VYG+1mQ3xkZgk
fhyJEGerEXI7EEGlZg6AAi6rtizaouT7uQSxwQyBQimURhRsvIaRvE+BRqq7TeBkQOfbRxZBw7TJ
EEc5SBu5mSvcEUK7XB+2ZAdMESy1WT5GwxXxXgWBwwmxvDssv0thvBMMFaYbFTqcP2Q8R1yEuIlb
EcC3xEx8uWRQgeQ3EFHcEdmKpte0Vv5vymYO0aQjx8UhUcQMEQFPFMdM4cMUK7ZX8Ug81Mah5bdD
HL4c8VpFpk8NgFUwkb2cdHzHFMgQgWzWSscsgUbEqxSDy75tA8laEb8YkbqXLBF4OlyorBBleADl
5UvsZsgp0aYIwVwXYcpDGXHDiEgkIcbNmxSOrLOACheJZFtfBa0L8aka4YB0aJ7AfBIkSbfXOhCg
vKEE4XCgl8wQ0bUbUQEYsMhH0UaufBUVPBdbRRC1JAGU7BC7GacRio/8JRNSqV8ZaavFLKkinKLL
jEJIDDgSfMZ0AxLx7BR05FV+GwHWfBB8Fnls2YOoGaQgebcZEVAElMJ6nJa7GUtdl/7HRlgQDQBx
aoYRIJWlHuGge9w4EvzI8hrRUkHR57ukWZdcCvqdD+Fm2XePdivIIyECKjvOJpuWFXZl9VcR+vqg
f9x1GMFIF20RNT05zxwYqKMwOl0V1ZwQdBtfJzhs6ybUCzGnj5YQNgCrm4zUJdGmoQZ5kEmlcLsA
VNyQDjHV4jWyKu1ZRDsSW10TX11R84o1Da0Yf2tccEmb++wQMNCGeZm54mrAvpsSJtZdGdnHT00G
e22nEyFgBKEB/PthGcGxHGVDCUHSmbO+DmMnF+PQcWHXMdYQKhdrplcQwzkSBOy/6ehp/8vUfuhO
t7kQJ4CISZvag81RMvWfBOHaGf5TsWFdvNKSLLT9FgsX1ONLBiLQgi+Al6dZtRDRit0dXhDam945
ZlxMzLkZEfJ13Ffd3IZaqAUh3SwB26PDJ29jGlkXstwHY919XP94pHnHnBThz/11Z8q3vfzqv3D7
neAMeQsRpglxYq8VkQZxANfJXvQtEbFp301tE4S7OWrELB5TGjR7EXVKnCt4rhLBZzE8zCML3DXK
mXqm1iSnuwtxYlGmjlc3w4LNqkQMAocl0z1jxpPxpO0TGpuGhBfhjwehhEiKESHw1jeaqyBd2ng8
Rn08bLqJkTPqECZWdRq+xUOe1fupSBJgS9Cd5DuT3aUrLpb0GRz+wRvhnmQw2f6UjRG8/NaafNQL
wa8o+xARzput1tsIgQIQGeRkHRL0W6UhJeIzoeSX0afVzRgxoOdRx3SyWNkPsY8EQcquhM4C8WJr
aaMHi7cNkQI5eea0ixLU+ebTfdPz1D6ZjhhPqBC794IYihB794qAOb0OQdDwdWILkAB8W2T4Jdev
WhDk/XJimdmta+obQZ1ZPRJok+siCj2CIud+sesLUQBPyY7FiRBUTorifo8fTX9RjeME8AB8y7cE
AXvRLhDZSVqOau0WMdGqmt+Wbi/XDT2yYWDD3hAo6RDrCQDrDo34yFmbx3nBGObEZuEJMa7RTmyO
jubneF0NhU3LtJXN6hLbDv7uZ7E1Ji8XAcXjCQED5Q4Rur3bChECZchnJLzloeyHnqrRAmHxF18Q
H9hqghduOr5lHW4CEy8RIYDIr73YdeUQ3G4YnI7wC/jr89vzfNbEzl7axb3z6zYQ4+oQ1PiI3IZr
uUbvHF8QWMTXCxFCcO5BXTaquQHj58eAuW2NCgFvok4GWj/ozBXYtt17LB+DBnH3bzYQ0w6glrZc
/wQRMqSHntwS8Bz1naMuKX8XAEj3Lb+A9AN4bN1/p6nofH+psRfYYn/v2ncQbdh/aE9awsxP1xQB
kd8Qj6SHCokSJd+cUA8bDZ+Swnqc1df7JXEAoYqbDsGBHYj6rbtbOt95m/7oeQIxAoaEAYf0MnGu
i6dC+XQxjcqfoSXZhlLX/YhqhsI/euQ6iqWIET/27gnxStmKAfCfAb+I+8brQjK4+6Wx8oNPdnQf
3gJ37gBBRuBAggUNFjxg4sTCEwcdGrTxkEwMiQVhXBQoAIYAAQEADIxBseLIDCUzOHAwsmAGDBgy
WICgUubIBAlmqqx5U+dOnj19/gQa1GFOmkKNHkWaVKnRkBJfPH1BhmNHAB+XCmSIAoXOGjUewtAJ
VipHqwRpePVpsiTKnRkuXDVY06ZRBETh3sWbV+/MuRX77gUcWDDTpk4HYiTjUWkDiVq3zuxK4yDi
ABwrgq1s+SBanhk0aP5Yu/PBhQsP8NoVinrwatatdaoe+tf1bNp7aYh8CJXMARFirzYADryi1hQ3
ZuLefTjAcgABKi5n7nxzRIMNOlT0nEFCzJukL1h4YFqp3KPka59HT1v2w/Xp3b+/KVki4ooE7AsN
HlzmDeMC7d83qLCJKMoMOukcmooq5Arir7/8GFOpBAlLIIEEiUYgQa0MxCuvPZ9ggy9EEZMCMS4P
R0QRva44M+gi3ypa4D8CejKhRhM66CC/m/iTcYAZD0IuhgSpemhIAT5a0KAbUngQQp0qhDJKC8lo
yaXSjDIPyxNT5LJLvnDyMkzaDrhMJxljrMhGNU0gCMccgWNoJhkJGP7gIQGHPBBBITsCyaEDqHNT
v4qs04klK7n7qcSeshSzUUdjw2nLRyfFK6QXVZqTgAUOmrCEkQJ1kowTHNPKIQJmmOG/OucTayrF
KpqqrAGTJMOGG0AN9SAdb2IpA0R5YjQoRSklNkxJBzq2WGWBohVTVP/bdKAJb7LuzVwJciyFglBN
9ceRwAKgIwGCks8gXCVqMrBhdwp2WXe9XFegeN+lV6KQmh2Jv2c1JYjMndLNtz+BulWgIn/JaI65
cYE66yAcGTjBBAkd4gBHQU+rC6l56+U4vWTJ+LhjjsvdqVQyoEXzpjVvxJED4fbj0ccBfKyoKTxj
ILknFh+SssIS3P50+VoSQ46UaJGPdu1jo5GeNISuejLZvzlVUtNcUEc6WGpVVdrT1Y9y5skGWweq
9tOrr9pYprSZZru1jxFoW+SsdRrVoH0BPKhqiSwWmlNPB57BRzpl0sjVgXbm6U/+AH7IupeVyljL
peOmHLB5165cZIWU5Na+aAuq8a6JyeicgIIJ5+hVMmqgDihbGResrskhzbx2+JS23XY2CyoOcH4J
mlavEkzofNWbBBzIuLJ96kCFDhh43PLZD2o3d+tnu3z668McHVusB9vdW54WhF0n5/keiYHrhMVc
ova3h/8u3OPnuHuBon4vdIYJKv8mHFUAzu4cEhzoMeBD2jMR/f4UqB61IXCB6TnAlAaCP/jo7yfl
wlXfZPIyCUmQf8BhAPTY9b7YOPCBJzyg2lBIr4a45wD2E4gAffI0N73pMUeRkoTcFEID8sWEyPrh
CoXIrgYOkVgthA8MySDDngCKb0xcigqkmKMe+oWE1LuiEbW4qPlt0UsWLIgEKEABoIAABAKRwAQm
IIGdwNAEDgBNSnjSnzcJ5G9waZ4KQqhBeQURZH70YiCLAiZBpuiOYRSjBNj4EzOqcY2K3AkYUTJJ
Oe7EOK0jgwfhIkL2ZLEg1StkKIdWRFG6R4kDGaMaIQkUR6qSRrtTC1vmuCtNDsaTnwRkKXUZFxXu
sjYvfMgYhf5JgUX+pJVr9EnoPhNHB8xtg/nJUS33Akpg3dKX16SdFbEZIgpUoAKpLKZPjhlOnphg
mSdxwCFn0oCg7UpdfrTmNuVpELgRcp7o6eYYySlOVa4ymZ85CRnUKRO+PWia8fxjLu85z+wttDYT
0Kc/d2LGRo7zJ5REiTTNVsOLwQWhf3RoSDX2JZGyZpjEFMoxJwAUdE5So5+qVh09ilBqltSmN9nY
R286knzqM6Wt3KdOlhnHl6rkbOOBp0J36tAuLhUv3fwmSn+KTKAMFSUcMEpRqxnEmtTTqV9NIU2U
ClaBCDOotVmmAx4w0J5o1YdJJWtcE9VLuSbFjCM6CZSEUv6h1GhMp3W9aVMBK5Qz7gUEznyIA0xi
Ibc+ZAGPXQBbX8PVsQ62pEqrrFMLm5e7yuQBap1kJnsC2QUw4HMjpKxlVbsokq7WJ5u9SmdnEsuU
NPYgpH1sNf3qWt5Olq69vclhjQLRlQ5EtrMFzVpsa5AFSJG0OKXpX4H7VcFOdy+KfCRFe3LOvPpE
iip4bBXd91HpWhesDTVvRSow1X5WVbnLNch3c6vNDmU2vU6t7n3JEAFvdpOVqXRlQYTr2QdkgK9A
WcDpSrhb/TY4Ur/V7zAjEAGgCNORAj5uRcJTGg6hLan2dfB5Salfb5aYAhT+iYXTaFzYjuQCJeFw
h+vL4P4Q13jEfmmwBb7TXwqEwMc//rEIhCwCxA6kn2nMsEo0dKUZN9nGT4Ywe0hMGgtUAMXGtGhn
1CLjn0SuQ1AGM06jDNwKVPnEZMQyUNMCYy6z1slhhrNYH2xeHp84KMRVI0t9xT6vAqWmcQb0J1tL
5ip788ppVk90A71oH45ZtTo2cwSA7ONHRRfEjAYuZqdrATOTc9I/LnJt/vwaTJfat/bkrZ0pRd7y
mjrEmnb1arpK41jXGtXus/VBP5xrXt+6k71eik5bDWwbh+zSjGb1sYnd4JwuO1FwdXa0BylnaRft
zdXGdgJ9ne0+Xpvb3yYIrLk96kaD29wO6TOOq01uMf6f291YdLSthT3sdy9a3LlmdwOVXe84e1nd
8iZRuvk9cF7OudT5FqvACb7wcOcXzAinNsMlLuVtF3vXE8c4xSNeY4iPd98Zr3WzHZwAf/cV5Ccf
icLhnV5hlxzlL8floHsLSHrDHNsOB2zHO/lxmy/73nXV+a97PnSD/zuuySZ60uNdEJfbdNaSU3rU
b4zrwLJa6leXucYXGnShY93r06YvQ5H6dbJXnHrb5PpBZFd2toPd6KJEetvlHna6e/HpWpp73s1e
cC2m3UQ81/vCjW3EeQfe8FPX+gILf3jG7z3cD1x84yX/9q5bz++4BPzkQS7y2t09NSTXfOhnonK+
x/4t8qJHvdsrf7S4p971qk88vS4v6NfX3vGPr9e8M297oud09xpr+oeCz3vin33pKZp9w4u//Kyv
nku6Z370ER97EbVe+teH/VBQlHxkYd/7zc+mx2he8+83nvOiJu/wy79+42f/neNnf/yhW3TBjP/3
8g/84N9PIvz3n9THhzq/uj//Ozzfm6mhGUAClDz98zagUD8FhECqu73pe7YEjMDQ25gH9AvS46IL
9MC5AsC/G6UPJEE3m8CEQsASVMEOpL/SE4q1W8EYNEHY8zz2kcEb/JDW4r5uw8Ee1C1rE0AfFMIZ
lMDPG8IjJELtYx8LRELsWxftqcEmlML/U0Jgmf7CKwTB9nsrLOTCH3RBj+vCMExCMuBAIBLDM0xC
SSE/NMRB0Os+LGJCNoTAvliPNZTDI5yLvoDBO+TDCtzBPrzDOATEQSTEQjTEQ0TERFTERWTERnTE
R4TESJTESaTESrTES8TETNTETeTETvTETwTFUBTFUSTFUjTFU0TFVFTFVWTFVnTFV4TFWJTFWaTF
WrTFW8TFXNTFXeTFXvTFXwTGYBTGYSTGYjTGY0TGZFTGZWTGZnTGZ4TGaJTGaaTGarTGa8TGbNTG
beTGbvTGbwTHcBTHcSTHcjTHc0THdFTHdWTHdnTHd4THeJTHeaTHerTHe8THfNTHfeTHfvTHf0oE
yIAUyIEkyII0yINEyIRUyIVkyIZ0yIeEyIiUyImkyIq0yIvEyIzUyI3kyI70yI8EyZAUyZEkyZI0
yZNEyZRUyZVkyZZ0SXAMCAAh+QQACgAAACwAAAAAgALgAYfGcBnamRbWshzEvimjwkuUmWp/f4N+
fot/foB+f355j3hqtXBYvHU6u4YdrpgSqaINm6sCd7IBYLoAYckAg9gAptcAvdoCzuMG4OwY5eAz
6uVC6vJJ6utZ7t5q4N55z+5+xPx/0/1/5/6B9fyH/PaT/umd/t+o/tOw/sqn/rmg/qu05qHmsIjy
nXv2tnL30nf85XT683Xp9W/Y/HLe/obi/pbb/qHT/qvl/tj+/v7+/v7+/v7+/v7+/v7+/v7+/v7+
/v7+/v7+/v7+/v7+/v7+/v7+/v7+/v7+/v7+/v7//v7+/v7+/v7+/v7+/v7+/v7+/v7+/v7////+
/v7+/v7+/v7+/v7+/v7+/v7+/v7+/v7////+/v7+/v7+/v7+/v7+/v7+/v7+/v7+/v7////+/v7+
/v7+/v7+/v7+/v7+/v7+/v7+/v7////+/v7+/v7+/v7+/v7+/v7+/v7+/v7+/v7////+/v7+/v7+
/v7+/v7+/v7+/v7+/v7+/v7////+/v7+/v7+/v7+/v7+/v7+/v7+/v7+/v7////+/v7+/v7+/v7+
/v7+/v7+/v7+/v7+/v7////+/v7+/v7+/v7+/v7+/v7+/v7+/v7+/v7////+/v7+/v7+/v7+/v7+
/v7+/v7+/v7+/v7////+/v7+/v7+/v7+/v7+/v7+/v7+/v7+/v7////+/v7+/v7+/v7+/v7+/v7+
/v7+/v7+/v7+/v7////+/v7+/v7+/v7+/v7+/v7+/v7+/v7+/v7////+/v7+/v7+/v7+/v7+/v7+
/v7+/v7+/v7////+/v7+/v7+/v7+/v7+/v7+/v7+/v7+/v7+/v7////+/v7+/v7+/v7+/v7+/v7+
/v7+/v7+/v7+/v7////+/v7+/v7+/v7+/v7+/v7+/v7+/v7+/v7////+/v7+/v7+/v7+/v7+/v7+
/v7+/v7+/v7+/v7+/v7////+/v7+/v7+/v7+/v7+/v7+/v7+/v7+/v7+/v7+/v7////+/v7+/v7+
/v7///8I/gDJCBxIsKDBgwgTKlzIsKHDhxAjSpxIsaLFixgzatzIsaPHjyBDihxJsqTJkyhTqlzJ
sqXLlzBjypxJs6bNmzhz6tzJs6fPn0CDCh1KtKjRo0iTKl3KtKnTp1CjSp1KtarVq1izat3KtavX
r2DDih1LtqzZs2jTql3Ltq3bt3Djyp1Lt67du3jz6t3Lt6/fv4ADCx5MuLDhw4gTK17MuLHjx5Aj
S55MubLly5gza97MubPnz6BDix5NurTp06hTq17NurXr17Bjy55Nu7bt27hz697Nu7fv38CDCx9O
vLjx48iTK1/OvLnz59CjS59Ovbr169iza9/Ovbv37+DD/osfT768+fPo06tfz769+/fw48ufT7++
/fv48+vfz7+///8ABijggAQWaOCBCCao4IIMNujggxBGKOGEFFZo4YUYZqjhhhx26OGHIIYo4ogk
lmjiiSimqOKKLLbo4oswxijjjDTWaOONOOao44489ujjj0AGKeSQRBZp5JFIJqnkkkw26eSTUEYp
5ZRUVmnllVhmqeWWXHbp5ZdghinmiwmMqWECaJZp5oRpqlkmmms+CGdBapIxZ5wI3kknQXriCSCa
CNR5kKAC9emnfoYiROhAix5aXwIIQNRooZM6yl6bElVKqaXvJfqQpoyCyml3mF4kKqOjkucpRaei
mup3/qtOlGakn7b66nKlaqSnrZveOl2sshoK7KC8+vrbsJICi+yexiKXa0bL9lprs8QF2lGarGZK
K7W8YbtRoMUSG1G03Krm7UbkNpRuuOWOli5D53pU7LvtdhYvRuCWtC679Vp2r6nWprTttP2K9q+p
/OoabsIFK0avQgevtG/DmD2LUcQvTUyxZA9DzLBJ8368MV4dK1pySguPnJjFCIssccgqE3ayQRj/
pHHMfOXL0cw1Lewyzl8Bei3PN737M9BaER3q0TrdjPRakDJt58BWOf00WTVnmvVUPl8t1tbjSl0U
vWJ7DZTSoZpltNlZgV0r2k5ZzXbccMPNdaZz0y21/ttlyZ33UHXbnTTMfwcF7t5le9V14TzZzXdc
azOOk+OJ90245DE9Dq/md70bMOYvI+4Yu5WDPujn35b+ltGqmx644Haxbrq8gW8W+ewtD936Xovj
HrbYsA/mt+8m6767YMMTzzLCraVMPJ/AB/9Y8oVzvpD1Bl8u+eu6Of839glJb3vvV4Mf/vHja420
+cSKnz3eKlMe0wEihMBQBBVUgBj57bJPs/sRCYEABzjAgUQgAhQ44P745yv//U8lE4ggRQaYvwpQ
IIEr896rdIYuzT0gAxd4gEUmIIESSsAiFrBABSOwmIVR7VDym8gDZkhDikTwhiesiAUuoEIK5NBh
/gwcEwc1MkSJZOCIRxShREBwwwj+kCIprAD+RqfBMDmQTi5DIgiV+BAQeJEME6CAExFCPxGYsX4E
pGAFMTg99X3piks7mha5yBAvgqAgTixhRSoQRSlGRnZbiuFAFkDIBVSEBCRI4kMOcEeDNFGPE6nA
BS6QPxZyrIpTgiOlFlXIQlKEBANxgAYcUJEwXnCMUKSkDysTxCYJ0iCdJOREECkQB9jSlhPx4gXF
OIGLsNFfrTTS8iySNRWoYAaelAgoySBKDRwRl11s5C5JeJFGZuZ2SKJcq4ypAlnOUiAZ0IA4M0BK
h3zxI+fUTDB7pEkyFJEhJeimIT85EHE6s5wL/rGjSKypzmAJ6ZUPWeZFQCnKcJKzIQewH0n4eU3S
+aid4BOoRUhwS2jShKH9dKONhlkR/0m0Ig5AokVtKMGMSOCClrQX6dDXIG1upAS1bEAD8AkRe95z
hCZ8IkUOOIEDplSlsoJRO+1UthJU1AENUKY9D0oRCTSRmhbZ5QV1ai9/rshu79zICWwqU6Xe0wSl
fKod0wmRNf4SNGRD0VAByFWaOoSit3wAWEmKyqjmb6qlAaSI6pbVj5igAfacqURK8ExbypWuJOzl
RUwJyYQcwHZW5RBHWcVSgcCUASrQQFKNqEUHiNAEc4XIU6kqEamuEiEw5UxaM7RWABpEoDYg/kMK
bjCRcWaAi6CNyGgxGpG74vUgqfWMXtlUNkMRgAAmCS4ZHksG2kbEoCMlQ24d8kgyjJUia/zpQKYb
mpVGqLWNOq54SwJTW47SAbGdSDlDu13lKqSuGDnlQU5wgrw6tKXFrZR4x4uCE5igBCWgJUdOgIKj
kqEGNbAIey1bAubKpL6n8W6eXgcqAsxgvyg4CCJJYFRxXgQFNoUmDSrC3ZugIMMDcfD74Deg1j5k
BjAer0JkOlO3SiSz4rRoDBRsYhQPBMARXqd9wCuRGBNAAQsRp0yjGxENGJMDNA2AACIyAAEMYADS
XfBIGqyQFPiYweaKLH6GSlSLHJchNj3v/g3SO5EGRMABPg6AnAEQAIdc+cpTzjJJAKzcBcj4Bs4l
SIlRs9oh5xd9GuiAkk9MBjZXhLZSFsCcd8wQAVgZz+11SAM68BDQanm/fg40QSDsmuF2isIcwWxD
cjwQQKt4IjaogaVnXecYUDohMpDBpbFMEC4nhMY0RoinB02Q/RJgngTpL0Vq8OqKiXk9ANUIA6Y9
7YmsOcEWmbWl6yyQWx9EBjGQwZUP7OiFALurAhm2lhFiYfEiWyBffggNEIzW+6JnssFKHLWp/d8A
bxiRMN00pw+C7YrQGgAwGEgMmj0QXY9bIIAWNUI6QHEOyNTTE4HxhY89EEZLxNvdFbJ2/sgsPsyq
gNozBjZCajDigkS6IQEAQJ4TvpA7E8DKBQG0lydecXRHxNcb97NsUzARWxM6qOERnOY2LRGTo/zX
55a4wgki55hzGyFVt7pAYMD1hNwZ0wg5sdgJQvFgO4TPygW11BkCA6ObS+TRITm7zh0RY067UgLv
QLBtUO5uU3rbclaItgNPEJobZAYymMGdHUJf+lq8ARAgbbo9DWSDtNvdETF8855NHaU/7NwN6Def
Af7vglR7IRTXewNQEHGGkyEG2pY0ABIS+wDY+tZuJ8gAcn3lAPD9IQLX7MXVTWyEGBm5DuG65gtS
gxC4Xrj2lg5E2Zd64TcE4AAOaQZQ/l/2zUK8792OveBhAPipm1/3vW81oBuSep9TxMjvRsgLup6Q
ea/G1MyJdkVSvwH3N8TAy1ZwBHFwy1cQtEYGhrdwCpd7CrF+CtF+3mdmCAEDIvBYL/ACCxEDLbd5
LKYc0yc23WdjC9FZIihvICcQlrZ1D0F/B2F/DOFlY2cQSwYSykcGF4iBGSgb+Bcc+MZ5HOF/DRFO
zkROJQgR3iZnlqYmLMh2BTgQAtgQ/dV4IEFnMWd4OKgQt3cRz0cZEsaDh0YSHxRCTTZODoBxFuF2
g3d1TZgQS0gQNQB+DUFfoAUCW/gQAHCHeHiDClGDFoFgT6hO0bcbcmcSNFRDNUVO/pZUfBEBe7E3
e+fnECeofjABA1kXc3vYhh+ngaSxg7MhdyylRbf1b6I4inB1S4KmiAixeN3GdbNmEAzIEK9IEDdA
h1Cndxtxe0ZHa5Y4gReRhUfXgZ0YPa5VEFokhg9RWNGFigVBAHiWZ2QgAOQnaU0YiVgIcn52ZggB
eguxbytHAxs4ELroiAhYgXpIEb54f3BnX9HzEnP0XJ11EMpIBl8HdijoiNMoES5IBu4WfwOhjQmx
b6d3bfSWEFJmicpXjhPBh7DRhehIO5WVEJMkeQphW7a0bv+lEAMAY3d2dd3GXDFQgPn4EAlmbMhn
EBAYgQaBWfu2frHmfAqBh3do/oNXKBEKyRB1mD7AqI60ExN2pFATYVBMVXzuVRCIp4p7aBB/aBC8
5oYWtnElWRCpp3po517cRG0RB3NZBwAzCREIuRB+6JOmES1ktkDCuBInRQEDoU8Z4QAQcIpa5msH
oXjMuHYFcYJvmIrH9XAD0ZTiFW8D0X0GgXYm0AF2xwAoiRC3F2lzJhE3eJOv542vASre8pB50YM+
aBIlREISQFYiEY8DMY9PmRCvuHb7pZd7uXGPpWwV8XTVeGuRJnsJQYUciYNruIDU2JBYRCiUGTuJ
M5YP8UgS6VfrppQ2RwB06Yo5R5xXho0LcZGr2QEMkBAsdxDbJo4GAZN3eIM1/lmXsaiDaTMo0PeF
MGFKvBSc1PVzDKGRd3acyCmLRKmRzPgQATYCAqFy2zhtDRCd3xdrSfkQlYhwmDgQ22kRAOaYfxQr
uwkXnpegCDFNUCUQY0WLC+FUiQURlWd8iXdlSEZ0DjGQxieXobmXCTECIkB3v4af0zZbtNV8Bkp7
kraYExigECGHoHWhquUmlcKgUONSNzFNJRShooVD5hmYQ0kQijcAxkkGfqkQ/fmZR6akBUFIMiaD
R2QBZncQhElxKXqVGRGOBjF/tQmFJ0ZqIUczigJMZTkTIuBIiUVCvNUQT/WgZ+eYtLWkTAqHBaGa
AgFqIUoGUWkBDsABNmpZ/hyQpad3i7AHowKhh3XInAMBg3aqUjm6KDpqOR8xjA+xpo7ES3KqW9Wl
EYd5A5GqEOllnwYxV8fllPxIBnnnc1OZWoXZEZR2hzE3exe4dZrKbtc4T1xqXw6xKweapjVhRgdh
SvAlEZ96ESYKcSpgbaxKd1NKBst0fKsqEKqnEixHaf9Jm2G6p2oXZItTqYrjeTqRqwZxSkO6EEKa
rua2rGTQrNZGcf0nU8Y2EPRJBjCmAsc2pjBhAwfgoQKhmFUoo5anqhY6eg52QS30MW/CGAu6E8Qq
EnHKrg/YAY8XgfA6ESdZr/bqre/mnCjBANDZq1R3cBGhccdVrUraeGZY/hARcFI9tUAKk0HCCrEl
MVoYcZIEwaEa230kiWzm+lojQKJBCxLUlp+CJ3vW2RB8iVwOJnYexxDTpEDCQzSYGjSDCBSaWrQc
kawWAYEGMarcpwECcXwEAZYKgUYE5BEAeagEkYVL6xDuRgANoKI8CxEUYEEopZZ8AUdXO66X6psh
QQEpxLUewZkU8VcWe6XwdhGpdXw+hrYtMZjGBJ36WZcYIV7T1qdl5VspBaR1cUWWWZk8OhQIJEVo
uVAZAVo6O2oEGlzHhWRQSgaSyxIwVblui2DfWBEzYEwpexHZRVp86xD5g7UddBhZWxQVVEkl0aIJ
kVutKxBk2hAqWZ/W/gePMwGrKgCdjfZYTToRC3BMsetLKEW1F3FAFqRdV6E0f9sVD4sUfNRH6lsT
3BW9ZDC993m0SgaEZBBgMTGozdVceCoR0+WoFZG3eju/EuG5CgwVotu+W5G8SVEBGMBDFrRIb9qZ
7DWYeqdd+KsQbbu4/EsGJEoSLvlrilaf1Ha3GFF8zmsQZhUB14VdKsS8VcG+4nrD79sUk6RCDXwQ
wxsSAKZlwxkRJme5Ase4BWG4HFG7/QhsbbsR68ZnwJu+TxTEDbFDPfTDSeG3OUwVO/wUK2S+5sSZ
CHRWFAHAeqYRVWmYFKdZRejEHMHEoLdp3Li6BUHFGoHGaYm4CqHF/hccFTj8xVIhwVHRR36US19U
vmQsEa7nmQ9xA1WZVG+8EHLMEfcqgye5vawZhwUhU3rHXmq8TxkMwwjcyEqBw4XhiVfRwzZcESCQ
t7vExXJbkkXsrA7YazLxUX/ZfW18mApBpv4IyS8Rv6/cxVYLwW0jnlgByC+LETF8EVJ6bARwyxHx
hgcQW/l5eqOsEiWwbmCrpbRcEMJMd8SsEC88ET3sw6l8NMqMFYasFYnsEIzEW3xkxRdhbCprhCHZ
tt2MEi5pAqT2lMAcEWSaeo9nzV1EEpIURePcNKpctcwsFzMsEBdkQRLw0AlxeRzXiwfRtgptEmCJ
AtdYkrwsEQfd/nMFnUsmoUJHMcgy05uEjBRjhcAoRRERR60VcY4F0caXuxEJRUBMXBBgqc+s6mEW
EW/dt9IRQaGKFRJresk7EdHIE8Z+Ec0OAbXOdQBNy7mxKZsKEb6czNQbIQJDe9IDYa4k6a43RhD+
uFhOZUImLBReTBioozDvjBW+JXkCTV8xaHkp29H+WasxaRA2sGaxihLf/MECkasoe1zCp8QQkbFk
wFUjHKQ4NNc/cdcdJbhY4855zRV4dQCCec4/2xDK95/Mx2zfexKMVtLIlclNuwBvLHzpLL0+lmiK
dtmYfawS4dQJMdQz8cAOYycXM9N00dWoDY4vuosCsbslAcor/p0CoEbCEvW7tS1Y7JkQJyBqbyxY
GIGzOCXXBiHcmfMznp0WOJpvpxFxtAV/wV2DN2iyr9edFLHNP30Qb72MRq3GiXa9AWzQAV6fZN3b
jTURE1veED2zo8Mnb2MaYsfC+ijYBsFcXdnc9r2aAIl22FcCqmeqy6jT0sXYhi0RGbbdKVak7/VU
I3RKJUUQ5h066I3cEcwsHlMaUHsRt1oQ2Bm3jwZoUZwQCH3ZZptsJc2krZ2nAmEDl7YQ/8ymmb1E
XmSsnWoTXkzjXEGpJoPlaeFpUngRXLeVA5GVPh5Ah91cklyY+V0Qhdp9Zm18Bjzhge2VD8FoVcaM
OJcQT45H/lFeR6BLBi5OsSqBNqGtNuKySZ9B2kO8EQO6dVxXkIpKEdl82M7l09xncQOB1uzGsQTx
atCdEBn2dTfHECE9EFXuWLzl1L4NEzB9GZPK5YXxkQSLgIvqpVgnadIJsAOR2MpU6hwdorncbQ4x
Wxl5Z86oEKW+EeS56ixR1xmVm4WuGDx9EAe549WJENjJkY/56aZ3EQQmEFwd549drRJ3mzmHeEd6
7Mie7BgRyy4uE4QO62MhKPEi730x7QhRAF0pEIV9EGTud+Y+EAC5EEg1wiiQAgvgANFathuXEH0X
8J+pnnoOj+yuyO4uRoIeuKBt7/MuLVgkG7rL7Qch5v4J/ngAkOEpCZCi528cVgL7XWzGNsC5jrkM
sZwBgKR6PpQty0zOVE1Y7BLxnj2iwvFxkVBJLqD7zpW2nhAh8IYR17ZrXk+BVdA/K/PSWRDL12zG
tpTApeK5BYAB5MdA3+ru8qtE3xeN/hDaGY21is5LHnGWnhD/DeAh7pQCoesOsbsKCXLFjqRcj1oq
rn2mGBEHcEQ0EfSE1ipnrxfdyhC3aniyqe0DMW9+2NO8rt/fXYTw7YRHT/NY/4ga5/cNocZC+EwR
UYgPcAEZQ/Zhtjm0cXuNz4YXSD+aR9j9Xt8iLxAnF/WfrGQLMb4GQQMQ7/mFRwaKORAx9vdO/s0E
sVRM/nWMRxRCdIQyTBPtf6H4sIHvEJH2xq/a2k8SB0CyxN8QkZiVkk/AykWGDkCKpScQI4BIoDj9
IFP9i08XyGL9eOGNw3+JDCGwMbf/AEFG4ECCBQ0eRHjDBsIYDREejGFQwMSJARw+xEiwRAmBDzI4
ePAgIwkSIwZmQIlSZEaWLQcmgOmyJUwEMm3exJlT506ePWe6TOBT6FCiRY0ePBCiRg2fMGCwfBGV
YgAARA+YOJH1xM6FDyO6dPqUzAGKE6uSucizhMcMIR3gTPkAwlGEMYnapZtX716+O/FiDNpX8GDC
hdMejBqVTFgBAQLs1YoCxc2lD8XKFCsARsWzAmkw/uWZUuVKmxdI74UZWCiCv4Vdv4bNUzXg2LVt
3y7Y8OvDFwOd1pY8WeZSGgd/YxZIsTNB0DpFt8X54ILpDHpb97yOW/v219kNeuceXnxOGrsRJh4r
4rLeBu0bYJSc4oZM8wd8Pw1AESP+ighrdM0JpQigK206004bKrW7wBuvQQeFmo22Byek0KDi9lsP
IwI2JMAn99xr6Yb5CBpgAIh2S8sxxwB47KHGVGzxIBFHFOjDjFByYKMSSMJoBJKeQxC7CIWssEgj
dWLwpSGPZBK2pZozKCyZOFxggQ5vMiHLLDnoYAMQXZqxxA1NhIigr8qiCqOyGjNPxhRQ+LA9nEii
/rNOEgbCIIM8CRRySb/8bDJQQckAlKBCB0W0KPv2w4nDDRfASEtJTSioA0u9bCArmxwtkSEU1xRg
OYnQRAuhAwDUAFM5M2rAUptEu2Au2Q69ScFEbxU0SYF0xbVXoRrKsCUCZpiBSoN05IglSzvgYNUT
gpMMoxIHGBNDgWLQjDM1sW3sLN0OskHEZTVYFaH2GPhSJpRmpdUmXn2FN7x2CY23XqLatOkGYosl
QIGBdMTJ0nQLCi4Fg4gVk0xGyZhK1IP0s/ChZTHF6EN0CXsXqIzt5bg2XjfumONvcxJRIH6tFGhR
nOIsNyEaydh3Q4cHUvkpFiHe6TOELG12I4kt/mUg6PdQY60okENGujugkmY6Yp2iFcjRDW2aFKtl
Oxj4oRmjplZhTwWCAUYBLuQJyofsJGkjFdbGmgHU5tUY7qbnxnhpukNWymyZoB5I6isj1fKgVgUe
+iGVBbKBU68ZYhhNAMjmKtyCGuCgJbZbNlpulo6+u3PUXKrJ83gPv+nZg4bl9++CJFWWcJZ8Hmja
aVvitmEy9Mbp1JLJsFHZi48qOkHORSf+qI81Lz5erAwqmdgN/V2dUr1gh3mGhF3CdrPGBPpPqHDh
jBM21pB/aPjkzzfabvTnlp4g+QiaWiPq+SqB0gEQ7lemqQqaj3SSuWwW5vpivu8QcH0HJNLm/siH
QCPNTyDCwYj/+iI92eUEXyloVat4sqwAsoQBKoAUuxbEQBLGZl4LLKGDHMi38WTJJ5DjXe90cjVy
ZSRoN0QSCg9iwBT2sFYa8+GtDnAngrCwQS7sCdkaoAFyZe0mhNsIEQ1yQxy6i4dK0mEQtSiTd2Vx
i9vZingO4EAytG8nldHAspzYEzttxAQLWNsCgsZFLxqqjl/EY0ZOeMc8uiaMDSKjGXXSFTU2QJB5
WRsI56jHK+6qkX2E5A5PGMkiIdEgEaBAJnkCAhAIRAITACVOHEipdelkPoUkQ7L4EsdF1oWPhHol
JWVpKPXNcjyqLEgEJLBLCVBgk5ycAC8l/oATSwrEAQ74yFtIRgYAkUGKfGllAfloK1tWU3hAtKZ2
yDiQTGYymD4BZTi/SUzpHdOcysTJDSajgYE8EzaPhGU25XmXWs7zNWN8CAUqUIFuDrMn4gSlP8lJ
huc4QKA3OVeVnGnCR1LTng/900xiCVGf7NObB9UJQD/JExMwMSU5ysm5qOhOwcATnhSdZ+g2h9Lt
6DOTEoiAUMS5ywmExqPHxKVMWkXFaPLFoX1iaVBnJVGh1qabFBhnTji5VI32xAQ4ygBJW9IBBsCx
Sj3Ni0knWtR5wm2rXM2ISzMZgZj+s6k8OScyZxhHObrNOg09KVgf2sWvytUg++QnBTC6/pOz6gSZ
H62OThIpR6lC6JVxtStFJ5nYvuQ1qWYNaE8ywEQNfCSwgpXjQjM3zQSolLGftSJRQZsXpD6IsijJ
6U4Ki5OfJnC0r3VXPWHrE06a1qNRFQqPfHJYxM6WpYv1rVA6ORgQSBAhal3oam2SWtZyNrjP5SI2
oauT4falti45ZjIFolyMWGlDJzgkHZ07XfLqMbrlxUl183Jd7KZ1uzlxFMpyolX01rd8wLUvS4o7
lFAShL0uKagDuPsQqYVQvAuqa36Dil8F74Wm31xqgG77lgEjxHmPilvmGrxhSYqWw9y0QAVkGs5d
qhcnE9YtTmKWP0Zu9sMvLgiDG4zJ/gpg0qxIjaxB9gvgj6Q4JycDDH1hPGQlyTa/FqWAjXnizRwP
JMIuYcsDKjxUBBPZyrT08JEtEOJ9lnUn3WwyGf7LkpCUOUjC4+2V1WxHI5O3AtPBawRCMGc611kE
dxaBccmAY14++VUpMY1RWivCNRf6JW2ergUuEGIv86SvN7kAkIgSvBEa2tKH/kl+KRDiJDc6ozPd
CaxktVsXX9rUjsyym/E61n/i+LFwUcluO4vmU9ca05kubwW4zM8QgDPMDB2vrYUdT1xP981cjmmd
5zwouCZ42NDdY3m3zM+DKJvOesbNoP3ybG7HWMbdHoxWnQ1u8kab3AOcdaXPve5v/q/bsLwdt7vR
a255y1rQ8a53fb2a74hWmd/87uK/Q6tugf+b3gWXpr8RXvCAL7zItHZ4xA8OcLhG3OID8ax5863t
bV/c48ReqbtPyvGPM1y63CZ5c/FdcjVTWuPPjmW6WT7zW7e41im3YsZpTvOGGxrnA9950GOM6A+L
W+hH/87Ji95spDe9gEQvt8sh5HSqH0TnrlTwyKVe9apnbOWUjPnXuU7udsP25xkee9p3qPTRnp3t
aoc7qov9WaPH3e5rb8nWi0oThd/d796GeleF/HfC4z3kKHX72wu/eHqlWp4T7S3jZ77vx8NzfJLH
fF3Oa8u6Z97zT3f8F/lO8M+X/n7ogUdg4hUodtOznPJBHDnrW8/zsqMv9rPH/eFfnvqw5973uw/y
+lTPSNn//ug999zohXd14zffIMxPeudu73zq6z74Tet89bVfvs1zbPjA3374DW99X8W++OJPO13L
r3e/sB/97z/93Jv0/evD3/7gv2+gzH9//iuw+xTKvv4TQO5DPdugPwIcwATEP6wbj/1TwAesvwUE
NqNxPwi0wJqTEAOcvgvkwAjMPxO6t/PrwNJ7vXAbuRFEQflDwLcJOxFMwdZTv6xqwRekwQJsvL5b
DReswd8rQSrDwR0EQg98iArcHOjLoSBEwtiyQSy6tyR0wv/LQOILwSekQsUD/r0VzEEdrELx60FH
MsLm2sIw/CH1OUAGFMMztEJvm0E0ZEMo1DzSa8M4lEAsAyo5tMM0vMH5krk75EMVxEAl7MNARDTk
KUNBbEPv8KrIM8QqXJIvlLtFhERA/EPAi8RKdBfP8pNCtERDVI0hUcRNjMPAUI3LA8VS1MPU0EJT
fMJUVMVWdMVXhMVYlMVZpMVatMVbxMVc1MVd5MVe9MVfBMZgFMZhJMZiNMZjRMZkVMZlZMZmdMZn
hMZolMZppMZqtMZrxMZs1MZt5MZu9MZvBMdwFMdxJMdyNMdzRMd0VMd1ZMd2dMd3hMd4lMd5pMd6
tMd7xMd81Md95Md+9Md/iQTIgBTIgSTIgjTIg0TIhFTIhWTIhnTIh4TIiJTIiaTIirTIi8TIjNTI
jeTIjvTIjwTJkBTJkSTJkjTJk0TJlFTJlWTJlnTJl4TJmJTJmaTJmrTJm8TJnNTJneTJnvTJnwTK
oBTKoSTKojTKo0TKpFTKpWTKpnTKp4TKqJTKqaTKqrTKq8TKBwkIACH5BAAKAAAALAAAAACAAuAB
h8ZwGdqZFtayHMS+KaPCS5SZan9/g35+i39+gH5/fnmPeGq1cFi8dTq7hh2umBKpog2bqwJ3sgFg
ugBhyQCD2ACm1wC92gLO4wbg7Bjl4DPq5ULq8knq61nu3mrg3nnP7n7E/H/T/X/n/oH1/If89pP+
6Z3+36j+07D+yqf+uaD+q7TmoeawiPKde/a2cvfSd/zldPrzden1b9j8ct7+huL+ltv+odP+q+X+
2P7+/v7+/v7+/v7+/v7+/v7+/v7+/v7+/v7+/v7+/v7+/v7+/v7+/v7+/v7+/v7+/v7+/v/+/v7+
/v7+/v7+/v7+/v7+/v7+/v7+/v////7+/v7+/v7+/v7+/v7+/v7+/v7+/v7+/v////7+/v7+/v7+
/v7+/v7+/v7+/v7+/v7+/v////7+/v7+/v7+/v7+/v7+/v7+/v7+/v7+/v////7+/v7+/v7+/v7+
/v7+/v7+/v7+/v7+/v////7+/v7+/v7+/v7+/v7+/v7+/v7+/v7+/v////7+/v7+/v7+/v7+/v7+
/v7+/v7+/v7+/v////7+/v7+/v7+/v7+/v7+/v7+/v7+/v7+/v////7+/v7+/v7+/v7+/v7+/v7+
/v7+/v7+/v////7+/v7+/v7+/v7+/v7+/v7+/v7+/v7+/v////7+/v7+/v7+/v7+/v7+/v7+/v7+
/v7+/v////7+/v7+/v7+/v7+/v7+/v7+/v7+/v7+/v7+/v////7+/v7+/v7+/v7+/v7+/v7+/v7+
/v7+/v////7+/v7+/v7+/v7+/v7+/v7+/v7+/v7+/v////7+/v7+/v7+/v7+/v7+/v7+/v7+/v7+
/v7+/v////7+/v7+/v7+/v7+/v7+/v7+/v7+/v7+/v7+/v////7+/v7+/v7+/v7+/v7+/v7+/v7+
/v7+/v////7+/v7+/v7+/v7+/v7+/v7+/v7+/v7+/v7+/v7+/v////7+/v7+/v7+/v7+/v7+/v7+
/v7+/v7+/v7+/v7+/v////7+/v7+/v7+/v///wj+AMkIHEiwoMGDCBMqXMiwocOHECNKnEixosWL
GDNq3Mixo8ePIEOKHEmypMmTKFOqXMmypcuXMGPKnEmzps2bOHPq3Mmzp8+fQIMKHUq0qNGjSJMq
Xcq0qdOnUKNKnUq1qtWrWLNq3cq1q9evYMOKHUu2rNmzaNOqXcu2rdu3cOPKnUu3rt27ePPq3cu3
r9+/gAMLHky4sOHDiBMrXsy4sePHkCNLnky5suXLmDNr3sy5s+fPoEOLHk26tOnTqFOrXs26tevX
sGPLnk27tu3buHPr3s27t+/fwIMLH068uPHjyJMrX868ufPn0KNLn069uvXr2LNr3869u/fv4MP+
ix9Pvrz58+jTq1/Pvr379/Djy59Pv779+/jz69/Pv7///wAGKOCABBZo4IEIJqjgggw26OCDEEYo
4YQUVmjhhRhmqOGGHHbo4YcghijiiCSWaOKJKKao4oostujiizDGKOOMNNZo44045qjjjjz26OOP
QAYp5JBEFmnkkUgmqeSSTDbp5JNQRinllFRWaeWVWGap5ZZcdunll2CGKeaLCYypYQJolmnmhGmq
WSaaaz4IZ0FqkjFnnAjeSSdBeuIJIJoI1HmQoAL16ad+hiJE6ECLHlpfAghA1GihkzrKXpsSVUqp
pe8l+pCmjILKaXeYXiQqo6OS5ylFp6Ka6nf+q06UZqSftvrqcqVqpKetm946XayyGgrsoLz6+tuw
kgKL7J7GIpdrRsv2WmuzxAXaUZqsZkortbxhu1GgxRIbUbTcqubtRuQ2lG645Y6WLkPnelTsu+12
Fi9G4Ja0Lrv1WnavqdamtO20/Yr2r6n86hpuwgUrRq9CB6+0b8OYPYtRxC9NTLFkD0PMsEnzfrwx
Xh0rWnJKC4+cmMUIiyxxyCoTdrJBGP+kccx85cvRzDUt7DLOXwF6Lc83vfsz0FoRHerROt2M9FqQ
Mm3nwFY5/TRZNWea9VQ+Xy3W1uNKXRS9YnsNlNKhmmW02VmBXSvaTlnNdtxww811pnPTLbX+22XJ
nfdQddudNMx/BwXu3mV71XXhPNnNd1xrM46T44n3TbjkMT0Or+Z3vRsw5i8j7hi7lYM+6Offlv6W
0aqbHrjgdrFuuryBbxb57C0P3fpei+MettiwD+a37ybrvrtgwxPPMsKtpUw8n8AH/1jyhXO+kPUG
Xy7567o5/zf2CUlve+9Xgx/+8eNrjbT5xIqfPd4qUx7TASKE0FAEFSBGfrvs0+x+RCEIoAAFSJAI
4C8CFDiM7LjVP/9B5AEZyMBFJDCBCk5kgBWoAAUoEIGVee9VOkOX5h7wgAuQsCIVlIAKJ1CRCljA
AhnkoMO0lSr5USSCJnwACiuYQotc4AL+MWTMAvEUQo0UUSIRTKIOJQICEPCwhxWxABBl2JjbiamB
dHIZBJUYkSaCgAwToEAKWWgQ+ongjPUbIAYrgEADTk99X8Li0tS0AAIQwCIkUCIEHOLFgvBQhRKg
SAheCEM2QmaIWbLhQBZQR0ZShAQkEAgENdCQA3zRIE+cQCAp8sNCdjAyVqSSHCnVKDuacgETiaRA
HMBKB0hwIhsUoyZb+ENDUmZ/T1KkQQgwgxmcUiKQFEgSW8lEEMQSii38ZGUQqaTlWWRrvTRlKgeS
AQ1oIIIOgEgTB7LBWVrkkpkJpZEo1yoTqMCXBEAlMAdizWuyko/g7Mg2bQdHIo2SDEf+ZEgJMBLJ
CJbAmhnIJkP6GJJ4hjNYQtLlQ1R5ERK48p3vZMgB7EcSg1aMdD66J/gYapFWErMmFj1oPWvkzIr0
T5UOaOdEkohNi1DQghmRAAU0+Bmyoa9B5NzIPj0aUYgANKACnQggAYkRAxo1gTXFKJkUqpF/WrOV
A4hINa+ZAWVKJJObtEgsN2hVz5DupgSyWz43coJ2aoCVUYUICSDogAeYYId/9OI8I5JBDVIxNGRD
0T3ttDuzsrIAEVkrCUn41olgFSMutGtW3xc2EtVtrB8xwQlUoAEONCCtEGFpBnRY2Ig8UYUZiaEb
FXIAeo70TBoFKxn2eYMb2HGlLF3+ogk665DDYmSroz3IPjmT1wztda8NYagNyJCCG8A2gkskw2wh
gtW5wjKGG1wsQXbrVVxCSHD/Swh1HRABShoXiZulrXLFq5DPkkGuFEnsXQmyXIMh9Lo5LcgA5otZ
kuzUo8O1CHlNQN2FwFQjMZQuGU5wgtL0lkHYnRR9ByCAtKLgBPwtQTA5cgIUPLWVNaiBfg1SghKU
diYFPs1XE5TaWAmgwfMVAApQcBBIOqABGoDxRTrQgXZGlAYVaS9OVkyQD7tLqQP6batkIAMUB2Ah
DUhyA4JaEco+lSACiAiDo6zcm/B4uv398Wn3I2ReySAGM5gvktuZZAekwCIaUIH+CpYsEACcGAAP
OTGD06rjknhYISlgMZbN9d78APdhYa4vQsyaZBbfIL8UKS2LTyyAADjaIQvGbJ1B0uH+vnYgrTXI
pEUM5EeVDbgH0UCN2cxjRFfkBow+cQBiEIOFTNnI7M0yQmgMkdmS15R3JMN3CxJi1zDTPSVWrTUb
QJDW+pgiNkh1owXCaoWwGsUZLsidEaLkJCvE1psWCK7tuOuBPJgiNTi2SBsL7Oh5hJGOpMihNWwR
RjsaBgNpNUK+3OAjk6EGplZIta09EGyT9yC8xLVB9BwRGkQ7qbJST0lZJTh0o3u2HYakxElQgpRS
EiHsNgiVGXLigcCb2eIWyJz+54zpTCuExh1QMrYlEk07qlMgV46IvLVM7vH8uXQLmIHDFfLiJTO5
IDXA8UAAEIBGb/wgjna0mwXy8YRE+ugCaW2eD4JyJVPEw71E50BScGaJNFvECQ9PglunZp2ne9Ax
9nlxETLzRitdIe4OAJyZDoOmF0QARU6xQlbMd4FUnd8OqTR1cb0Ak0MEBl9Pza+vc3OJVDsiC1Dz
2Q8CYxsTmww2yDezY6BsuSek8zNn+kG+LAP6ah4hBOaAZZMMgZD329Yd3uW2J2J31owYO2OfyL6J
HeFKQ1LCEl/k5AfNgWGTAQWtvYHrydB5uMMg1WRg9cwTPxAZhJnKmXdIA2j+vHp/+5shvERnrh1S
99oTpAYhWH51w/6r1zGM+yoPLsVZCdSFPLkgh0aIAJ7/brirmgxNF3qhlxDJh2R/dxEt93IK8QJ1
pxAGtxqLpxxMRRF/d3kPwVM/BxEHd3cCMHfmRxCeJ3ogF2/UR4DdZhAHeBHSdBAwIAKl9QIvsBAx
IHTNw34SyD0b8XcZaH9U1VMUQQOhV3SMJoIN0YAI8YAMkWd9VxCA9xHlRwYwGIMyKBsReCxCBhLb
Z4E+BVA+WBFtp2oC8GFGWIQfKBAZ5xAPRmC9xhFFZ29NJ4XOVoISoX631GfAkXsisUWv9BDtFFDj
9W8Q0WzN53GHV4b4RhH+BDZbIECHDgEAROeI8BaFCvGEFpFhZ5g+8NMbjUcSgzVYUhVQe5htC4Fi
JMh5b1YQA8gQqVhyL5F0SgeDkziGFMFqNIhX1jUbN4c+sfUAE9eLvihYncheomgQc9ZxAiEAprh/
BiGHcQhwdrSI1GZ1GyF9MSCEbjd3CFGGDyF9imeDuBg92UUQLGVCmaVEyfV6DbFgBLBxQwiAB7GK
zTgQpzR+TLhvC8EADNAADJAQQVeL1hiCHueCkjiLzGgaVah4E3gSsfWJXHQQwygQvURfUDdzHwiP
Dqhh26aABEFj+diEBoGP+KiF67aBHNhoHlh3A0l7suhrdmgu4BgTGXD+ARYgYAsRWw6QbfylEEQW
aPZGEDHwYTFgfkiogdtGjwShZh3QkYDIABypZMVlXDaAfurniO8WiXAoEZRYSQbZaVtpbjDhRRR1
XEGVbbI2EANgfWLGEOZ3ifKVlgQRfitoECrQAXNpbYJHXQ2AlPnIAMhneAnhikQHixORkgthiWG5
lW/DaS+pEmFEEATlEbbGYcs3X+s4ACf4jgZxiLJHcgWRgFOHgimnhQMheB2QAiqAj9uYjG8nEVHI
iMxGA7UIgdczJ6qVFwtnUrUpEC9FQc4lEg9plvS1jpf5jgN4mZFGAIJGBtwGjd9GEXO5j6r4dXGH
jUh3EFKojZtnkS7+6T+Ekpt1ATugVlt/RJO+CYgEMQCBNl9+6Wz4J18ROQBGmRA5SRDbp30dUJix
GXcJQZVEB4VRmJXLWJCwUSee4p2Qg4cvcUzeZBH/FXgLMQNoyWC6to3tSRBERpkQIWEjQAb2mBC7
V2yZR5JQtmx/qXQAEIMAWhApahEd5pocEysG6hYIGhNbtaACIVfQuBC7SUaBV5YD8Z651nUNIaLn
GWYEsJ7KeWkHEUFJlo/6tm8o8JT3ln4VIYSuqI0rGhGJCHE+ehm0WSkxqhZdhhPHFEg4ylzjGRGx
53RRZgPGRXBD+hBwekoaORBMeU0WAJ2zdoBPOZwR8Y/USRAMiJ3+DMF3awgawqIo/hJfMiECmJRC
KhRSDYFV5KldLvqmEaGZHJpyB9GcSfpLKIiUS6Z6a7qRfwenGeFugSqJLmoQSoiqiLoqiToZCWYT
jupHYfRHcIVMF7F9nIppsNoQw9WhmqacLZdOCCGqWniX+0RjHpkRraZ0PSmYLZgQdRSXBYiY6iIo
YRoWY2qrt1oQ3cSrV6WrGPGhUacCE3EDu9cAAjcQkZR1dhSsAuGkDfGslQiEZJB0VEmthEp42Wpg
C9StXbGJOBGufiRLlSqe5moR6CoQ6qp7FWhK8DkQG0oG6IRKK3aoK2EDB0CSqvZ2WVoQRVmnCyF4
JPBhMyVEH/P+Jiz7EeGpEWekEAvLsA1bERV4lDjrrO6Ka/V1sQ7ZpSGxfcl3mdNJqG95rCbrbWoY
mQaBQOtVGEQTjl/DqDuBsCFhXhiBcqFJEEIqESgXY8eqAASBtQVBAiMwAjM7Evvmp6kGkA4hr7nm
Y3wXcwqBW10FGFhEtUFjsD5xq2bbETykEb4qjd52Efskt912mAqRRgPkEQ+LiqoWqA0RcOlEAFwn
dRIxU3YVAejVF3LEt4rzaTEbEo4auB7RmxRhAqtnuDCHuBD5Wp9JBozbEiaQs8uogqaEmhZRV1zl
mJ9LF3tbumPxrUSRWBZQEpIaEbPFtR7JsQYoEJWHEHpWuyz+UQK4a4ZBhxG9pAKNhFiKhRCPeT8w
1LcipEC1ehSilbcf0arX9la+2rUDAb1PWm1phxDmqRLNyrOYV1psWREzoGZ2RLZahVsaYVS51TZH
I7oFS7oEexEuVEi2lBN1xr8EQb/RWG2jhq8SFhNranXGlX8aMVsZe1vQRQHL+xD447vsGxXD+8Bc
k75KUQGdlEEtXEYpDBJ1JooYTHU8m2ShKZoWi7ocQaXaRZ+09rUYkW3uaxCcq0EdFLx09UJ1dcNN
oTQMvBW5+BQXgAEwZMUGMb4h0WH7pRHOW7hCXLYkYb302a5pnGO6VaoTUcXSJcYNUcNIJRWhC8N6
7MBSQQH+MslGeQxPFgW1gzwRcoyOGzGXp5mXo6YQbMwRRMyhbvzGEyFelbYRN2zHCiFFX5w/UIHF
WazApFsVdWXDFEFQXGVAhwwRy/ebEJFpCwB4Qku7JQG0BsEBQYzGlnwQ9FtniVxROUwQpzzBTCHK
UjujU+HJqPxNIHDCYNwQ13pH+SsRIcyutCYQtXwSHGWqQWzBD3GojycQsAwTzGzMSPHCyQyzo9wS
FoABQITO6QVd0bwQhBefFYFvBzCsjxfM1/tvKGdZKRjObfx45bwQTcxJ8PzFSoHMMiPDW0HF9SwQ
liSp6jXRClGUGDGDl7h721wSVCpZPmxt+MoQa/jDDVD+zQ8xzBkhkxaA0Tmxxw/tx3QhxWTAuRwE
0wAnfvgciHsaxDJxmHqmpN08ESf9wxvB0hkRQEchynz8FOD51EaBo74btQ6RfCoAl8gaEUTXaBaZ
vRoxUQM0yQTBuPe8WhgBpwHdy+XKoyDhqJHcOAss1VeszH6hXlZNvXz3XR92rFztiICNEDegZmvG
1jKbtkWtxm+5bePsnEgM1BgxVKA1EnE9OQ4tGKijMO2MFRdNk5JFYEuIEBpNfq4ItwLhpm7Krobd
ESUg0giBsJZrR8QqERErvcNW0p6ltSJR2TWR2bi52Vfh1IyxQWRwAILntA6h1QRAwLEIb29LnRn2
sTH+EXPShMtySwAd0LoJPb8EF7a4jaY3SxEv5daKvRPDO0MiA9x50Vp+vRBv+NwDEZsn4asIUVzb
NgIc1XJrTWx+uhAnsGvevdoMYVtwRVQFQdaZ8zPEixZu8lV0/RZFC5HoxNwH/oQDObnRJ6C6l4UM
Mdsku21y/FpnHHUSUWAALr8Y8Vk1O+C6PRAI7hJT++BVwyeJWRp8p8Ra6Z9XSQb8SbkZsW++R3Ed
htIlrdxR5doFAc6ntxCG5hDGndstvrmyZKNk8OIqcZsE80Y0Pps2HtoUIZgGwa+OmBHJhwLb15G4
fcZprNwEQa+Z+b8JoWdLzmEfPRAErk1epKArDuP+ws0xNGMyMn4WtqaGGIGS2WilqylIbqprN4AC
dAnOPsyzuEwQctvmKfCu/CinelYDC6YQ/pwQUZ4QOApOuapJe/4yOxPoWiwupPQZxk3GGzGy5QeD
IWvarpx5hhe/300GB5jYSUrh2jaPBSFu8h3nIpdiUOeQaPoQloQQpU7lCS5Cqs4VYKrejRGUK6mi
AiGFqrqfSXcQljhrdXmvWkgCKi2Ps1dsJ6idXmtcT8cQ594RNXrq+nLZFdM+1p4Y3NjchJnoYW6i
PTmDxY6CFlFhFK0Qx4rP637V6Fl6egfv8Z4RxlSm0X6+vAU93Iob+74QBUCYceZ2crfxSNbYHvr+
qwURpecVlz/acsB+2rnbEDfwZYGGEGV50BXRR91E7yCxx9P+NdKSRbKRYbD5EDsuEdOp6R4dcb+3
Wx6OaelO6S7Hj5fI7gNhA3nXk3SuaTa/0pzcEmiT76szLD0PFxMF5yzo8RARhUePECGAbwWo6yVd
ApG72Lg254Wp7T3mjMgpAD29Wj7aXq60WRekuhnT5+7iEGB/GCPrEP/ZgBiOEB+W2jeQAnlZl2k+
0CQ7tkTaELGZlan47p7uoxX3AG3VhRKlhzLx9WMvpq2y+nmBtAsBi7UH2GNeEAYX7gWhAimA4pSH
+UkrfgOx+VNoEAHYmemZ7Fm/pAv5QJ14jlf+bvh8tjm0IX2wn40wSD+1V9rYSIsMkZSGDX8Ir3W2
T/WoyIIDYYwYC2bz1fI039oFUU0N+RDj6Pwnofqx0fqwIfJYme0lqXT6bxIAceDGQDIFDRqMcVDh
woIJF8IIEECAAIkFZwwYIIDhxoImShzMoEFDBpIkTJ5EaXDESZItH3CEGVNmggQybRqkeVPnTp49
ff4EGrRnzpk1hR5FmlTpUp40aDgECgOGzRcTJwYAwBToDRsbY3zVCfWg1YgBxP4s8bFgSwcxTY4A
2TLDS60baRpFShNBXb59/f71iTemYMCFDR+WeSBEjRpHpcp8EZkMjKsAsh49YOLE5hNAu3L+PAtT
6lQyB8hYvUoGrNC0D1y/7unSMNGktBHfxp07MGG7un3/Bg469MHIkkcXtNyXMwoUPBlzJK2TtAgB
lFMXpNFYqNy5dHe6zvD3rlIEtoOfR3+bN8P16d2/P/p1OHGDj3Uzb66TMQ2G9m+SRg0rhbQDijvv
bnrtAtf4Mk+oBuGDMMKjHlyIQgkvxJCMp2IqrjQRoluIAAKSaqDEBjhiLoUbwjrItIL8kym6iTaq
4TOfDOSpJQUPzMvCoXzMMEghK7ypvSGP/I0/0UCEiYAFRFzgKBNNlIkgm1ZTDaqpJKJItIiu0oih
gVY8yAGRTuRIrrRMgmklk3CszcjdkKT+s06FgCwITzv3VIoxAh+CUSYRBx1xJxMORbSBDjig0qYx
CyoAowEYEguqsrAKAKYAM4XphhSam9IBNHVCqVQS4pLNQT11WpVPV92TE6dXZ9XKReh8IlREjhDl
1YSFOgCW0QY608kGSTEqVCEsHUKtS46aNWujA2xE4cxGYVpghih3cgmCoFq1aTxax8VQT3DJRffK
GJjUaYYZCFUorbRu4gDYDkok4wT8mIvpWAIm3ci+r5q9bCMBYiAry+FsIEgka2NaIOKIc7wAKHHj
TDdjCWOVVWOPe5rP0RvcfZcABQqS1ydgrz0IvxQYGuAiSWOSEWGKCmaoOutwVpKhFDT+6ODMtjiS
uOjCzh0M6Y+X9stcjpnOWL6frCQj19KCmhJfjqi2SAaZAV7IVhknwvnZMBXKjiNgR1KLIRMWUEEF
o/tKoLyllIY6bwaL1Dvvnnvi16BcdbWpV81OUHRlrTul2l2MYFpNqi9nFOpPhRoY2lQS5iUjbm23
rQtvu0Tvu3SlniYDddORXMxynQI/iAB3Bz15V0TVVnzUsBWywVhkH4fcIIrKOtszhoHyfGKtSK9Q
9dWfD/2mvaCf1dae9BWTDJIJV4hXm+xdfCPODfIXbNBOI9j1nqal2kyRbgJ9KbvjdJ56+09/mvn7
69Rsoca5N8ihfKI7mIyPDDGTVLL+INcsAQCgRkhhGHNCRcDClKd+MNHf/jQ4FL5tkGm+UoiKYpKy
wpQAhAPw2sxucrDrkGFF1pvaz6xFwaZdkCMX82AOAeM0HabLgAXJD0xgWBgQau8iJtuJVUJog/cJ
xWEaCN9GBvWtDObJhj3EYmA6mEVX/RB28BHgARW4k7+RwQFnPKMTOSC0mDjJSfFj1RVHx0U6Nq1I
cqwjcA5wqpYFMUJhDMrf0IhGJ4okAyXgI0OeRCg4YrCKqXtkHiV5kFXhcZLBIZZ7DvBDMhQRKM8h
wxM1MDSskbJUadFMtkrmpHBZ8k6uvGQsidRKWR4pkwqhAAWAw0lP/uQzT0yjYWb+J6LajQ6WVjxm
LZUJyS0uE0KAPIgEIpDLCAQFBCAwiAQmsE2e/LCXPlkRMB3Qtr/IDko3TCYznbnOvDSTnegh50Eo
MIEI1LOaQLkmCCSwz31OgCfQ7OQDSLKVUI6yIIksTCORib90vlOZlWyoQ33CSYPk0qL3FMo2NSoB
nwDyAQ74KCl5coPmkIkMCM1NJCMp0XWiLqIs1ckmYVKBCliUoxnV6DZv2hMBOkAuHwWK+w6qGxyq
6qUwXSYPkeqeCligphHYaVByOoGo8pQ7A/WJAxZJAETiRqVHXeo6pzeTsKanphSoJ1Jyys+gmMCQ
GQDpT4r2JMQUlYpgLWtL84f+17zKxKK5pOpP8nnNqVY1NiOBK0pv4oBcKTR06VxpX2GqOr5KdiMU
OCtaDeuTwgrljCFV7E3iNijHMtS0lkXtTyCaWsNEgKbUTEpngzJIn/7EXSqAUmh7dLfKsvadLvVt
YSw6gSECZaNHCYlcbDsD3EZJtxZ7pF6CO905FYW6fcGmVvaJFIeRRKQ9Ad1zeWJXKl7XvBwM13mZ
ck0JdXcuSGHThHjbW/VKFLj1TUp2CwOC4sKkJSdFSjyru1v8Ftid6DSwNQ3D3sUilo/ibVKhTvDN
OCYzsgmWLGUxLNi/MHixtB0qTwg1AD+OF7L03fBk75tinfAXu/q9CVvSCGH+KVrNxBa+MItRu2Id
F0abGiVDPg9ryBnjapVjdOSJe7zkpNGSyQqJgAUsoFad7tPDPenuGePLk+0BEMGnfXKY2XPgHtez
AmnF6UY362KZZHnLXB5mMdnzVTHXeY7pDTNNn4rRnww3sAoRcoxrS+MII5mSJ0axnTN8RyY31ak0
5TNnAUtVfxrkyjF5DWwYRGdFd/rLZF3yBS7w6AiEwNSnRnUIRLBqEfQXsPycQKB14pIFMYW80E20
p1nL4xRbYNRn3ixPpvrn2PxUfg3Nsa4LzOsNQ7qeupSqbIudqnaCWdnXdqSTm63npx5l0pW+Ubcm
VDf6YdvceEZ3gh392lL+p5nYP8EqrvF3bnprezC9vsBrC5LqENgpusmut45dmmtJOhXaC+G3qft7
nlurNuAPjyOZIe5VRE/c4qC27sXrSu55a9zjN5T4x609boKLPMEDN7mtkV3ylGNYwy1X1XxhPvPm
hZzmnybwzXXesYzv3Jgj97nOKxn0VwKd6D5HOdL/fXSmK2SsGId5wx3edKrjhNkeX6nUq450Rn9c
6zfeetgPMj+oTxzZTxd72lPX9YB/PY5oV7vah35ut0c87nefZdk7/VWW453ubK9z3VvZd7/Xe+5P
rhuyC7/4mMD9zgI/O+EZ//BWSZ6OK5985u+d7mX/2/Kat3jS1St4e4P+3vSP3/x1+X561ut9I2RP
rXTL3XraN5nzZSV9z2u/ewzanJ251z3vhd+b0js0ogAfftpf/ttIWjD5z3c98Z25euhX3/bBl6Ts
MWZ97kd/zNmnfvfF33vf7y/rnx8/1Q+vw/On3/3lzxP7Mf9++nu/6PcDfpLrv3/sS9902u8Rx+O/
AVwIAcw7vWk/AlRA+zu0vAm/BYRAkIO/Pck/8ovAC7RABvS3lUM/DFy81ZqVxLsb2PPAEpTA2zuS
CsQ5E2TBE+y/cuHAFpTBF/y+IHnAGcRBF0y9CFFB/8vBH9TBbIOP8+tAIKy99QuOHqwQEjTCJgxC
H0ypBHTCKaTBBiT+KpUrQip8vuWbjazTwi9klTDcISIEwzIsPtRTOSw0wzWcwLWTuWNjwzhsw2Mi
Qzm0wyocOzziuI67wz7UQJ6rsDT0w0H8w/gbPDUkxES8vkWswaRwPkWExEJ0w1cywAGLxEvMwNRT
wprDxE5kRHSKQU8UxR3MxJgbxVMkRSjcjSxExRIEEj3cw1aUxVSkJIuZxVsMuQvaRFy8RAqhLOTj
RT9cj0q0umA0xp3gjVgBxmNMxFhsj11kxlnEi2RkxWgsQ6PAi0e0xm38kbuoRm6Mw28Ex3Ekx3I0
x3NEx3RUx3Vkx3Z0x3eEx3iUx3mkx3q0x3vEx3zUx33kx370x3/aBMiAFMiBJMiCNMiDRMiEVMiF
ZMiGdMiHhMiIlMiJpMiKtMiLxMiM1MiN5MiO9MiPBMmQFMmRJMmSNMmTRMmUVMmVZMmWdMmXhMmY
lMmZpMmatMmbxMmc1Mmd5Mme9MmfBMqgFMqhJMqiNMqjRMqkVMqlZMqmdMqnhMqolMqppMqqtMqr
xMqs1Mqt5Mqu9MqvBMuwFMuxJMuyNMuzRMu0VMu1ZMu2dMu3hMu4lMu5pMu6tMu7xMu81Mu95Mu+
9Mu/BMzAFMzBJMzCNMzDRMzEVMzFZMzGdMz0CAgAIfkEAAoAAAAsAAAAAIAC4AGHxnAZ2pkW1rIc
xL4po8JLlJlqf3+Dfn6Lf36Afn9+eY94arVwWLx1OruGHa6YEqmiDZurAneyAWC6AGHJAIPYAKbX
AL3aAs7jBuDsGOXgM+rlQurySerrWe7eauDeec/ufsT8f9P9f+f+gfX8h/z2k/7pnf7fqP7TsP7K
p/65oP6rtOah5rCI8p179rZy99J3/OV0+vN16fVv2Pxy3v6G4v6W2/6h0/6r5f7Y/v7+/v7+/v7+
/v7+/v7+/v7+/v7+/v7+/v7+/v7+/v7+/v7+/v7+/v7+/v7+/v7+/v7+//7+/v7+/v7+/v7+/v7+
/v7+/v7+/v7+/////v7+/v7+/v7+/v7+/v7+/v7+/v7+/v7+/////v7+/v7+/v7+/v7+/v7+/v7+
/v7+/v7+/////v7+/v7+/v7+/v7+/v7+/v7+/v7+/v7+/////v7+/v7+/v7+/v7+/v7+/v7+/v7+
/v7+/////v7+/v7+/v7+/v7+/v7+/v7+/v7+/v7+/////v7+/v7+/v7+/v7+/v7+/v7+/v7+/v7+
/////v7+/v7+/v7+/v7+/v7+/v7+/v7+/v7+/////v7+/v7+/v7+/v7+/v7+/v7+/v7+/v7+////
/v7+/v7+/v7+/v7+/v7+/v7+/v7+/v7+/////v7+/v7+/v7+/v7+/v7+/v7+/v7+/v7+/////v7+
/v7+/v7+/v7+/v7+/v7+/v7+/v7+/v7+/////v7+/v7+/v7+/v7+/v7+/v7+/v7+/v7+/////v7+
/v7+/v7+/v7+/v7+/v7+/v7+/v7+/////v7+/v7+/v7+/v7+/v7+/v7+/v7+/v7+/v7+/////v7+
/v7+/v7+/v7+/v7+/v7+/v7+/v7+/v7+/////v7+/v7+/v7+/v7+/v7+/v7+/v7+/v7+/////v7+
/v7+/v7+/v7+/v7+/v7+/v7+/v7+/v7+/v7+/////v7+/v7+/v7+/v7+/v7+/v7+/v7+/v7+/v7+
/v7+/////v7+/v7+/v7+////CP4AyQgcSLCgwYMIEypcyLChw4cQI0qcSLGixYsYM2rcyLGjx48g
Q4ocSbKkyZMoU6pcybKly5cwY8qcSbOmzZs4c+rcybOnz59AgwodSrSo0aNIkypdyrSp06dQo0qd
SrWq1atYs2rdyrWr169gw4odS7as2bNo06pdy7at27dw48qdS7eu3bt48+rdy7ev37+AAwseTLiw
4cOIEytezLix48eQI0ueTLmy5cuYM2vezLmz58+gQ4seTbq06dOoU6tezbq169ewY8ueTbu27du4
c+vezbu379/AgwsfTry48ePIkytfzry58+fQo0ufTr269evYs2vfzr279+/gw/6LH0++vPnz6NOr
X8++vfv38OPLn0+/vv37+PPr38+/v///AAYo4IAEFmjggQgmqOCCDDbo4IMQRijhhBRWaOGFGGao
4YYcdujhhyCGKOKIJJZo4okopqjiiiy26OKLMMYo44w01mjjjTjmqOOOPPbo449ABinkkEQWaeSR
SCap5JJMNunkk1BGKeWUVFZp5ZVYZqnlllx26eWXYIYp5osJjKlhAmiWaeaEaapZJpprPghnQWqS
MWecCN5JJ0F64gkgmgjUeZCgAvXpp36GIkToQIseWl8CCEDUaKGTOspemxJVSqml7yX6kKaMgspp
d5heJCqjo5LnKUWnoprqd/6rTpRmpJ+2+upypWqkp62b3jpdrLIaCuygvPr627CSAovsnsYil2tG
y/Zaa7PEBdpRmqxmSiu1vGG7UaDFEhtRtNyq5u1G5DaUbrjljpYuQ+d6VOy77XYWL0bglrQuu/Va
dq+p1qa07bT9ivavqfzqGm7CBStGr0IHr7Rvw5g9i1HEL01MsWQPQ8ywSfN+vDFeHStackoLj5yY
xQiLLHHIKhN2skEY/6RxzHzly9HMNS3sMs5fAXotzze9+zPQWhEd6tE63Yz0WpAybefAVjn9NFk1
Z5r1VD5fLdbW40pdFL1iew2U0qGaZbTZWYFdK9pOWc123HDDzXWmc9Mttf7bZcmd91B12500zH8H
Be7eZXvVdeE82c13XGszjpPjifdNuOQxPQ6v5ne9GzDmLyPuGLuVgz7o59+W/pbRqpseuOB2sW66
vIFvFvnsLQ/d+l6L4x622LAP5rfvJuu+u2DDE88ywq2lTDyfwAf/WPKFc76Q9QZfLvnrujn/N/YJ
SW9771eDH/7x42uNtPnEip893ipTHtMBIoRwGfntsk+z+xGF4P///ytIBChQgQgcRnbc0t/+IPKA
DGTgAhaRwAQmOBEAUoCAFIiAAQ/ovVfpDF2ae4AIR1iRCU5AAhKwSAUsUIEWbhAxC6PaoeRHEQc6
8AIPoIgJJ5jCilTgAv4sLOBiEIinD2rEiBOx4QNzGBEQgGCHJ7yIBS5QgQw25nZiUiCdfqbEB0AA
Ik4EgUB2KEGD0E8EaKwfAAFIhhZW8YWMwd+WtLi0OhHgjgSgCAlIcMMvNiSMBuEhCiniPwsEUYij
k6OVaEgQPN5xInsciANsuJADiPEgUOzhRC4ARBdGBotUoiOlJuXIR0aEBJJ0gCodQBEQXJACPKyI
BTDAQjhCRpFNYiRCZjADPCrglKgUiBJV2UQnvjKKKkQkZYi4pOVZBGwq4KUpIRJMgWhAAw4kpkOc
SBBYTuAil8wMKI1EuVaZ4ARkwCMkCXJNbLLyj+HsCDdtp74iiZIMSP5kSAkwQoIGZmCf2YRnPD0y
0IoFS0i6fEg1LTJCbTrkAPYjSUHvRzof3RN81cyABmpowwe8kyYTNWg9beTMiugPlarMgCoFMACI
TBKbGRBhBCm4EQqEtGKkQ1+DyrmRfa5ylSyFyDUdyEQdnnCQGRmgFUFDNhjd005lK0E7szkAAVAT
mx61SCYx8soM2tJeB12R3fK5kRNMVZVVZeAIH2CCEkIxjPOMiBsv+FV7VfRET+VfB9rpAJYCACI2
xCFbjRpLjKywihTQ5PvCRqK6kfUj50yBAxpAgAH8FbBdJENbJUJGxVLksBmkQCXpOdINlZRVOhXI
Pm9wAzKgIImBZf6iCTb7kK1yNbR1Hcg+OdPUDOWVfwappg3IkILWSkSJBJktRDIZ14kQsIV0Rchu
PcNMCQkOuNIViCojoErjRsSLmi2Ich1iwh7ClSJBXKp4acvUsMqJpwQRgHxT4tOfDtci7BWICaa7
EKRmZK6eJcMJ0Ema3jLouo0aQFUD0NKBoOAE+y1BJMnggI1ixKxndUANaoBfg5SgBAdQiQYRQmDT
5DRBF42YfFcsABvcAAWvDe5PP1oRFOzVnQOhQUXGixMYEyTEBb7rgH7LEAHEIAbybbBCJrvKEldE
BXwlQwDkG4CHsDSo+r2Jjwny4dNUdz+/bZWRkSyAKiuknddUJf4KUnCRBSygAVIOgJzl7BAFK9iq
+s3vSECskBTEWLf8NbF78fNUqErkyPNdSAPa2QAHnOC1N7gvRUKMAhaXOQZFZnFa80ySDwe6IKw1
CI9TY+BHla3QBuHrO30s6YoIAAYrrvKRFTJmlip5IPtVdAc6EJHZ5ledA/EuQZzMmi+3J8XYFUij
aUwG1gLZ1WQu80BmjRBEDyAAG+Ywl59dkAZ429sL8fWoB1LKZgtbIA+mSA24Lc5BryehGAF2RSKt
bYqs+K8wgMG0EyKDJA+kBq1OyLe/vV5fM6SUeTTInyFCgw0zVcjnOW2wxFZuzUZ4jxgnQYWZXZB6
CwQAVGbIlP6lLRB9CyQG7CaDnat6a9aemyAN2HUHvg1hgz+EANK84y8JsuWIYDrIpQ1PoYOHcGIT
ZMZG/7eOBTJnOick1k4ng8kRsuI7H4S1fjaIzMFdkRLwspcJF0gK2HzonwsafuBBcOlwDnYCLCAh
FYapmotbbTJY2sxUZ3EAzJ7vqRNEBmRW8EJgTHgybJ3rD/H0bsGuAAK4XCIwoDapcVmdoRerARxA
vENyHvaDaHSok42xDQJ+8rvTGtYhN3vJDWJkGQge4A45wa4z720QpBzXvu5yIysOedicGDtql8jA
uR5hT+9RwhgXSC8duJCzotvlt7c76vFMddTLWd9HNrvkBf7CcoKMviEyp724xz9ug+DckRHpe0Jq
EILoUxfi0UF2wjhAe2+X/yB7nHHzNcDxZpNeICGXb7RGfVOneqqXEI+XEDI3c3BWEWwnbwvxAgKY
EA23GsamHPA2EYfXgA+RTatkEQ5XEFVFgA9RgM+WfQ0RaggxexxYETmXEDAgAiH2Ai+wEDGwdM0j
K82BbBtxeP2nEBplQz/IcGYXayToEBN4EBXIEH5WeDDXgh+hfjRYgzYoGxd4LETmEbumeQ4xVCrl
AJ82ET9naQIAZEnIEGfYcRHxYAOWdB0xdVSoEChoEe63TO7mG8EXEv50XHKXZ3rWEJuGZIjGUni3
eiXod/4EAXsTMWCzZXsXAQBzJoU0qBDqB4IhaFc6iIcIRhJrVVQP4VEO4In3R2tWd3LRdhAHyBCp
GGwvVxAMwGsg0XSQOIWUmIZlh4OhcYWxYXnH00UPkHHAGIz91IkFB4grh2ev5le2uH2qeIALgEc3
4IiuyADUyAAdkX1Qd1mUeBFz6GWZWBvllFpKhEOY1VEHMYoEMQAzYGvUd3IDgYjuCBGSx3vTWI3W
KHAxB4UGUQM0gIN6p43vKIO0SBHdaC6UN3nR0xJd5EcOMY6euF4KIQMyMAOlSBB8h4oS0XAI13kD
0QEq0AHVqBDDB2o2kG2sF2va2HcDORGV6Ht3iBrw5f4SDsRCdWgQC1kC95drCDEAEqlgHHlyQBYD
8LiEB6GOtyYQDzhNBaECH0mNDXB/MceADQBjxdVaJdl+B0FlViWJFdGSDFGT6YN2XpaBKhFGEXVc
RJVcfxiGALhyDQGPHpeOV9aOytd2rciUKkCNgOZpArGA3kZ4CZgQcwaJZLCSEWGYCpFtZ2litoJq
HBQ9qYUQgARZ5cdnBnGMLqaK+0h6Kyd4BQF2YrdwA6GX0iVVhwcRTRcAABCHh0mDYEkGN4iLFng9
cxKZeSFxqNUSEkRBzSUS6DgQI2hnAtCKBsGM56aOFKlghQhqjphuEsGCDoGNUEcRVAiPBVGQryEs
ff5im7GTOI7ZEOVVRijxmyrXk4KngppJEOcmkbb2EDopEAyQlw0RcwzBjwOhd8tJEJCYaIU5hV55
ncw4G3XiKdwpF7wYExdUXhhhQhDBlgMxA/3mmcSJkepJEBBKiK2olLpFAiNgj/eIECNJkiUZl3ZH
ZQCpn5AIAIRZg/9JEC3adZbJW7FSoKtzasnGEMeETAMBV9KoEBKEQt+UeA6qctdGBvdFdg1xiVkp
EOiZTuh3EAxwTSGJjwPnWlVJBuznfidaEKm5mrb4jl8KEYw4W7qHiYamKOIUkzRxTGXEo8tFRhFR
pgqRmaK5EHFJnwfxZwh3EB4JZfynEOH3l8QVmP72hpLWWZhh6hCE54YySjNoWhlhRhMiUBATkKAo
1Ju1Badxent4yqSuFRGKGKI8R2Dnd0dvp3VMWY30xwFyanhb+Jd16mooaRC0+JoG0YSx+n6VIizL
ZKM2MamU2llupaAZIaovNhE2MHAM0AB2Jl5kwHmnahCp+qF7+WEa8KofYaIFMYlSB6wHcX6g1qTu
0iq78klqOhNoFEgJqqOE5V8WMXwceAMqMBE34JEg2QAMsHKdRwKcd6wXwYUYwY8xAImqWWUDmahO
qk6EOq6LQ6NgYXk64a0Fsa4B9qaaahF+2YLzOhF4OXP56pO3NgJIGa0wxqgnYQMHEIJdWp0Im/6w
0CgRikcCIUZAV/QxbxJHNuqwDJGuCEFTWgVFGZGxBLGxHJuX3pacnjkQIosQ75kSLidsd/dqh2p+
nMcQbFhzeqZUA7QyP3OjD3uuOSGxIXGxF3GaA4GkE4GvXjeRA0AAOzcQYlsQHDoCPDsS+dhsJ0ll
+bkQSRl2z0Z4PZcQXTVihaFFXtsVuPmSESsQcdsRDKoR9ad5uZp4z2pnTbqYCqFGbNQRoloQyaia
EpFzOzd2WBcRz9VV59UXdHS4XKF2OjsRk9q4BHVTEGECGduCk8sQ1PhpWScQmNsS8FptZbalDVFK
DIC2EnFYb1QQbloXhvudWAO2QBEBhvS7H/5Bu+7ZVkzJgAVhsgeBed4Wpfiap74rE4EKhRsmmxFx
R720AAwQrT7EQuplEJPZEANURRWgOEfDulsBsUehQQWUWx1hqwoxXh/JvQPhvQYBr/hKrck1EyUQ
ldyLsliqEbykAs+IEfebWIR7W17Vuvv7ulWTs0rhRgG8E6N2AgQ3bBFBfwMHkg68oTHRZdDZWpG2
EUwJgRTxXIglAdjbECa8vFfxvCJMFf5bwpwURAJcEJakEqM2igpcEBs4pQdBtySBlQkRaHSHvBcx
Wzr3Y7Ikv6JFBqmbvJwEXUMcwoZxoE6BAbTkSduEqR/xYXr2hxQRqA6wrPpIELLLEdbLZf70uWiC
uhFr2aoQAWD0K8cLMUW1ZMRKw79tQ8JRcQEYQEURkL9ghKkbjMkUYcgWxxEp4JHL6pQL8ccc0cdk
wMArnBH5xZcSpcgIobxbCxWPDMlp7KtU4UYDtMQKUb901cESwW2mRJ4QEWrnNqRkYMocsbTfq8p7
rBBuOGqeLBKwPLGGpMtPUcuFm4dVYUhKDE6uBF3RdRH0iBE2fANVSgbIfBILRRAZK5URQWxRSVvE
DBNJDMdKQcTb/BHQexOU3Em87BAmPM4WUc4VAXAHMFzwOs0qgZMH8ZEf6W171Wjx/IQrXM+jNRL/
XEVLoc0ys4ldccaJ9VCwfM3zSxEIB/6/h0aUytYBkRsTWHlOD/2qCCymFv1tdiwRP5wR15wUq1vE
UcHGX6FMD1HGA3G6wCwRN9C3EwFyRraCLPjMKrGYsQqwFd3SryrVOm0S/nMUtQzUtOydYH0UPAoC
Ax3QBuFyKrBPVRsRBBt10gqdHAFRAITKBIG5bIZ+62y1AyHBq7ygQSoSk6rMO+HRyMPNgXHNQjx4
gCkQz4ZHC9C2ESGL+XkDKRCfVu0RIjACI9DOBRG3jtS2UWkRROuqNY0RuymeIkHYRWPYgYE6CmPL
WAFadXVOA+aECVFZeHSUMAgDI6etA+FiLjahIoGTjCq2pTQA6cyxN53ZESGsgJ0QrP5NE7BtUv38
NSE81lZBQBFwAIpncxDBS21bWQtRiS/wjwKxYSkbE4GrtJ/Zdsr9bQTcvX+2gRlhWzN1QoHNxz3x
vA5jJxej3XLhcl/3xTA4EJM4q2SgvigRw2JnXJU1AJ1toaKb1cSdECfgXTKnAc5tsYU1rEdlEHad
OV0r260rLcki4G/xtLv3k4wriawpZ5AYoP+63CBajc+81Csnp9I0APbKdRd+EOhkXD6YEbv54YSF
5IzbNCU+PXzyNqZBeFz8lQKBmFKWoirqEQt9fB+2a7Nlj88c4eM9ADId1wj8f4OHt8rG4Qjh3c+N
385FsZ/d2kRj4g/LLB5TGoB7Ef7cehBTNpjmzFowFpU2ftevCMPLWpTi3bYFgG5QqnlKytdG6hAM
jUlAq9OAJOc58dMqnjSO2j6h4WttiBH5xpoumm/oTUiZKegocOjwvILbS5oHAaE+6WBkp6H7+BBb
RqKl6eEVexBlPRBH7q40gTZ2jjXiMkqf4d10vBEvKnWlToOp7uf8ycSjJ65mmxCxzgCeXZeMXhDl
zG4MjhB/ZmtJy7Rv+utmFFKVqukz8dUiBeq9IZQIa3KsCdx+juUdF+lSPHMNkZf3SAI5/a30KK6r
eBB0R6QVmRADDxLt7k3v7tr30z7HjhjYaRAq2ecOkZp0FpsOwQGwKBGP5tgLof6Ou53W1+kQrRWc
C8+0Dc8RxmSpJL4znT4WghIvNd8XF38QBWDlDoGfT+0QnQuiu6ZwbAYC4vqgFHlHvE16B5/WAsCe
yulh5/jy4HxJsKTuIAPv1IXi0CMb6TvuB2HqEnHe09kQhLfQyEcCZTr0THoD403eFA6aBxHpT18Q
NgB47XkQhgzeG2HUMGHsOa82wzL4cQFRvI4QMODzDuGf0we6BxECAPd4MGbfHhbBbk9uTP+TOpzr
LsrEebf3fM+WPOZPGSARIVDNoQNChn8W5Nr6fPHsjU+DLUmwxAtkw23ZfZnVAmf54K6vBJD4CyGb
LbmKdkYAWNbro9+JD1lJIf5g+jMPQpPnELCfF1M7+1JnELIIkA1nklr3qkPo18+MnOOd3sKfEKtY
gCLYmXR5+QmhRDH1XcTIEpyeg5tDG9l3/eXtmiJgndkImwARgwYZggUNFmyQ8OBCMh0cKmRIZsaM
AQQGGKQRI+JGjQthFIzRkaAMGQNMBthosEQJEwszvHz5ICVDmDFn3sTJMEGCnDl39gQaVOhQokWN
Hl3IE6dSpE2dPoUatWdIkUNhXL35QsBWAQEAVIWasEHEAzduWLy4EOzNtWQ+EuRKcIYMimlzmihx
MIOGmiT8/v1bcATgmhlkSk3586lixI0dP4a8lGniyZEtX8YclEbGo1izvv4gw7UrgMwRb9iISHUq
QxgBXHdFScYkgaErDcI8HNHvCL01c0PeWdnoTgSljR9H7lN5cubNnx4IUaMGUs8pX1x3e3Vr7KMH
TJwAf6Ioao49r749AFd0gJBIV5Z4EF++UNyWGTe971z/fvvCdfIHMEDI2tvoOuzOsyw8FFAISrqN
3jKPIBFiEG0rgmiYDimYLrjgt54ueOmx4J5CID8BT0RxuKVSZLFFnFSzrqDqjFuQwZ6kG8gjCHGC
UIAYYNjOoAyNygADDF6yICj55pPKxOH8czFKKQ9yMikop8TSOc6sw+4AEXY8SAECxmwqggY6OJOh
BVO4YbWC0iNoxpl6BP5SANKEJI+oIo80LKiaOoRqRKcEzbLQQq+k0lBFmcvxQTBTGjNS2o4SC6KN
zMqJQDI07VGAlDzrylOGzGpzIQ1OTYnPDErwK6XB/irMw6KqJIrWRW890daCdMW1V6OkG1LHR2eS
lMyeTEA2WRMa4ICDSm8i9SC7DKpKpNYCCDKl10JN6YYUbHQgXHFxIhMwc0norb4nERWKV1/fdY5d
guSFt96b4HyQqIkkjUhZZRc6gAOH0LT0JhtQE8Akk9QSSaT1uGOoQogNOiBPFE4Qd1xiIwUKNwhm
pbcnQu0lmT933S055ZRCGhans/Y1lqD38upp4IROqHHBmxQewELW3v6iSuKUKvRRU4NswJSMU5d2
YGN+gZLVJ5SlVrlqk5ezOuuZ2sopaZhpe48omwsmo8YUIuJ54XxlrLOroX/MloxGF/p2aQ3CdZpj
4EKWmm+t/0bsZL8B7xVGoZImqNjBF6qUbIMQL2iuuqZ9U8aCfNzuzgcptBOjYA9CoYNTM2iaoWQn
mkHvwEsMdHHCX18Ma9hTnjsonQ0i4OtJZ/L3u/DGHqtbxAcgySRRGY7zrbhw8nmhzw+6m4xzSbBN
LpgVCNz1jUaevfvLQtbeexSjez6n2x+/4Wvs+002pYGdDR7ggw4maIDJV5Zx2+PHQ/qo1C1qUvh0
IkDxFbBdOSmOAf5vhS+h4GxU1vvfQv6Fk7GlpHoFsUENKtKz/THEYVwJAOWGUjHIkcEBGmAO6wY1
NQW28EmScSHgvrOQEhJgfQVBFlEct5AL1i9tHURehQaQJ6Mg7XYZKx1mSkRAg7Awhk+sleygSLKW
HIRNMwmbZVhSEPtNbmKpgQHn3NYmBhLFWxhDImacSBkmTtGN26PXGt+Yoh4SxEYpKaNlqiib4qmN
eZzjTgqIaJTQjY50N0mYH4PCvRfO0ZGBk+Ijs1TH8wkoh7KhyO5ysryCOAAmSLHbISGVtkW2cVem
lGQq50U1VWLpAOgySCVPdEmjzA2JSSzK0kS5kbSJMCKMBBkqW/6pSpQJc5iZEU+ADlBHMuyxKA4i
A0w0dhS+NM1cK/EdCibCs5vIEY7HBOegWBlOFyXzIBKgQAUowBxmOpMo5NHlLi0jOZMUAI6oBCY5
9QmUYu4TRbQ0SAQEKtB1EgUEIDDIBBQalDq6cyhtslu4aHaZbfqSDN78pTH9eUzwbTRAEz0IBURK
AYEa5aAgkIAEFKrSoAC0mdHMQFEgWk3p6SefQ7mpR3U6k2JqdKdAYWZBKjBUkUagKQpFqgSGAlBP
9umhDEoiLJOD0QH+1Ko4jeRVI7PMlAxVnSQ9KlInoNSlVnFJDoia+chQKqmWJqel9KlWORrHuMpV
KOksKlmPIv7WsRqlJbEqyphIxyrjUNVKdkVsUBLYzcQ2p6gkNSpSxJpSvxYmpkJZgKQ8mZm38tOw
jf2p4EBrHLyOVK9BOelJJ3ta+vDFMGnN25hwKSJhfna0VuVbXW/LkK+KlLVE4WtfifQSB7S1J8Ui
wGwDiE/b7ha34NOtcwlCVLA6ha+/VRJaNysU3RW3Mc2dV3Slu8+OjvcxIp1AHosy2aPUxJPKvQnq
xoQ94yKlsyJLwGLNu1/KwJC/UUEoYijbXvfCNiX/WwBB6lsr8F5UvP/daHkh3JSDpmgvrjVwT1pl
39Y9eMIRzuqHhRJgy4BAvSnZC+kynBOQMngxHhaxR6Eb4/6ikBgyFc7JXgjSpwUH5QQOxS9zaTzk
xIiMyCO+sY1ngkQNwLLHQ/PZHdtVWxgfWcYStvJNTOwYHOfklgoWSs+MZ1Gegve+WaYxltH8GLES
5KRCiWfpnsxLngGRja1bc56r2s0qezQCFbBABY6a0pROoMtBiag158wQDibSznteYZ/1jNsQE5mg
BN3rdSOy5ZkkesNBkQGFTlJmKk/a1BmtNI29qs7Irhe9K13Im3EyOmsSBXOKPOyLJX1quc4YzRYA
9lAjEIKjvHqhBjn0TOIDk0Xv7IvhLTWvpf3NFWWZQ4GugFFDsG1udzsEIgC3CNT76kKTQdY9WdKK
cdrgM/5P+9RqprEFLhDokkp2skrOsW/U3RMVvtjd/2ZstY+czghA1t5J1ZO+Y6drgDe8zP6lcTpX
3WpXIzzhNrFvfiPtcI7z1MhDljdRh01so1j84g/4WDD93XGW91fgIpZ3oAtKBm+THCjCZY6ZG9zy
PPtaxETdSM23fWKbspvnR4e4x5HeHHbvfOmT9vnTv6fxlUvd6r9M9dXx0/Rda13EUff61qPi9LDz
Ordlz3iH0b72XAec7Z7F89vl3sRxzn2AzO263YncT703Ee99B/yu6v72dvM58IcviH6VvvbCvxzx
h+d72Hfe+MeXHexLp/ydK7/5xMOb58akOudFL/ikd/488xlV/OhHH/mGnx7Vqod9UrLecyrnPfYO
vzzt/3573kN68WvOL+h7P/yNpP71Vp58v4m//FN+fO9jtz3zke75/7reStGXPuYHb17rtz373/d9
kffLdfCXX/w3UT5oicNw87ef2m5HbPephH33o536VwY9/evP+O2DGPr7B0DHOz9/kj+DWKIARED4
+71wIr8EdMCHK71UWr+qe8AKHMAFnKMCPCX9s0DAOztHmjwO7EDIuz8DCsERREF+mj3YOcEUdMEV
dDAF0kBoe8Ea7L//6J4JXCHjs8EejAgelL3XaUEfJEIBPD6racAiVEIFvEB7mcFVWsIoNEKsI5kQ
FP5BKeS9nnqX4AuU9MPCL2zC7bmVJ4xBMDRDGCxDLLHCM2TDG8TBKEnCNpRDJhRDFiHDK5xD88st
PEzDjcvDP3TDRDEZdvNCQDTEMHzDqRrCQ2TECAw/zoI+PmxEAPxANZq8ScTERXI+2so/ScxEBNTC
7+rETyTFA0LDvomKQizFVcTAOkw7tWPFWIQ7nFBFnwBCF5PFXNTEU6TBuNPFX9zEVry7SATGYpxF
w0PEojhAY2RGFcwqHRS7ZpRGZxS4O/TEaSzCnhpFbOTGXaRDkOnGcDRFYYQrcTTHUiJHybjFc2RH
KnTHcWzHeAxGuitHebTHG9zDa7xHOfSPdQyvff4ESHiEwvcLyIK0RXq8PoNUSG8UDrJbyHNUCqZY
xoekSM8KDn2syE/EyIzkyI70yI8EyZAUyZEkyZI0yZNEyZRUyZVkyZZ0yZeEyZiUyZmkyZq0yZvE
yZzUyZ3kyZ70yZ8EyqAUyqEkyqI0yqNEyqRUyqVkyqZ0yqeEyqiUyqmkyqq0yqvEyqzUyq3kyq70
yq8Ey7AUy7Eky7I0y7NEy7RUy7Vky7Z0y7eEy7iUy7mky7q0y7vEy7zUy73ky770y78EzMAUzMEk
zMI0zMNEzMRUzMVkzMZ0zMeEzMiUzMmkzMq0zMvEzMzUzM3kzM70zM8EzdAUzdEkzdI0zdNEzTDU
VM3VZM3WdM3XhM3YlM3ZpM3atM3bxM3c1M3d5M3e9M3fBM7gFM7hJM7iNM6kDAgAIfkEAAoAAAAs
AAAAAIAC4AGHxnAZ2pkW1rIcxL4po8JLlJlqf3+Dfn6Lf36Afn9+eY94arVwWLx1OruGHa6YEqmi
DZurAneyAWC6AGHJAIPYAKbXAL3aAs7jBuDsGOXgM+rlQurySerrWe7eauDeec/ufsT8f9P9f+f+
gfX8h/z2k/7pnf7fqP7TsP7Kp/65oP6rtOah5rCI8p179rZy99J3/OV0+vN16fVv2Pxy3v6G4v6W
2/6h0/6r5f7Y/v7+/v7+/v7+/v7+/v7+/v7+/v7+/v7+/v7+/v7+/v7+/v7+/v7+/v7+/v7+/v7+
/v7+//7+/v7+/v7+/v7+/v7+/v7+/v7+/v7+/////v7+/v7+/v7+/v7+/v7+/v7+/v7+/v7+////
/v7+/v7+/v7+/v7+/v7+/v7+/v7+/v7+/////v7+/v7+/v7+/v7+/v7+/v7+/v7+/v7+/////v7+
/v7+/v7+/v7+/v7+/v7+/v7+/v7+/////v7+/v7+/v7+/v7+/v7+/v7+/v7+/v7+/////v7+/v7+
/v7+/v7+/v7+/v7+/v7+/v7+/////v7+/v7+/v7+/v7+/v7+/v7+/v7+/v7+/////v7+/v7+/v7+
/v7+/v7+/v7+/v7+/v7+/////v7+/v7+/v7+/v7+/v7+/v7+/v7+/v7+/////v7+/v7+/v7+/v7+
/v7+/v7+/v7+/v7+/////v7+/v7+/v7+/v7+/v7+/v7+/v7+/v7+/v7+/////v7+/v7+/v7+/v7+
/v7+/v7+/v7+/v7+/////v7+/v7+/v7+/v7+/v7+/v7+/v7+/v7+/////v7+/v7+/v7+/v7+/v7+
/v7+/v7+/v7+/v7+/////v7+/v7+/v7+/v7+/v7+/v7+/v7+/v7+/v7+/////v7+/v7+/v7+/v7+
/v7+/v7+/v7+/v7+/////v7+/v7+/v7+/v7+/v7+/v7+/v7+/v7+/v7+/v7+/////v7+/v7+/v7+
/v7+/v7+/v7+/v7+/v7+/v7+/v7+/////v7+/v7+/v7+////CP4AyQgcSLCgwYMIEypcyLChw4cQ
I0qcSLGixYsYM2rcyLGjx48gQ4ocSbKkyZMoU6pcybKly5cwY8qcSbOmzZs4c+rcybOnz59Agwod
SrSo0aNIkypdyrSp06dQo0qdSrWq1atYs2rdyrWr169gw4odS7as2bNo06pdy7at27dw48qdS7eu
3bt48+rdy7ev37+AAwseTLiw4cOIEytezLix48eQI0ueTLmy5cuYM2vezLmz58+gQ4seTbq06dOo
U6tezbq169ewY8ueTbu27du4c+vezbu379/AgwsfTry48ePIkytfzry58+fQo0ufTr269evYs2vf
zr279+/gw/6LH0++vPnz6NOrX8++vfv38OPLn0+/vv37+PPr38+/v///AAYo4IAEFmjggQgmqOCC
DDbo4IMQRijhhBRWaOGFGGao4YYcdujhhyCGKOKIJJZo4okopqjiiiy26OKLMMYo44w01mjjjTjm
qOOOPPbo449ABinkkEQWaeSRSCap5JJMNunkk1BGKeWUVFZp5ZVYZqnlllx26eWXYIYp5osJjKlh
AmiWaeaEaapZJpprPghnQWqSMWecCN5JJ0F64gkgmgjUeZCgAvXpp36GIkToQIseWl8CCEDUaKGT
OspemxJVSqml7yX6kKaMgsppd5heJCqjo5LnKUWnoprqd/6rTpRmpJ+2+upypWqkp62b3jpdrLIa
CuygvPr627CSAovsnsYil2tGy/Zaa7PEBdpRmqxmSiu1vGG7UaDFEhtRtNyq5u1G5DaUbrjljpYu
Q+d6VOy77XYWL0bglrQuu/Vadq+p1qa07bT9ivavqfzqGm7CBStGr0IHr7Rvw5g9i1HEL01MsWQP
Q8ywSfN+vDFeHStackoLj5yYxQiLLHHIKhN2skEY/6RxzHzly9HMNS3sMs5fAXotzze9+zPQWhEd
6tE63Yz0WpAybefAVjn9NFk1Z5r1VD5fLdbW40pdFL1iew2U0qGaZbTZWYFdK9pOWc123HDDzXWm
c9Mttf7bZcmd91B12500zH8HBe7eZXvVdeE82c13XGszjpPjifdNuOQxPQ6v5ne9GzDmLyPuGLuV
gz7o59+W/pbRqpseuOB2sW66vIFvFvnsLQ/d+l6L4x622LAP5rfvJuu+u2DDE88ywq2lTDyfwAf/
WPKFc76Q9QZfLvnrujn/N/YJSW9771eDH/7x42uNtPnEip893ipTHtMBIoRwGfntsk9ztBmUFML/
AASgQSJQgQpQwDCy45b+9geRBzzgAg60iAQmMAEJSCSAIaCABiMQgQMi0Huv0hm6OJeBC0DwARWh
IAUlYMGKFPCFEViZtlIlP4pcIAM4LCEKJ6LCFVrEAv4XsEABY7gy/JlJhBpBIkVymIEdQgQEUOxh
BX8YRAO20GEgDNMC6aQmAQxgABUhQQ4h+EQoCqSHLDQI/UTAxvphUIBkgCERGWNELW1xaXX64gAE
IICJkIAEAnkABPrHECiC4CAVrOAVIfK/ClhAiAacXh2rVMOC6PGLfYTIHwfigAdkwAEOUMgBDolI
NLrQhEL0oCThZ6U7UqpSM5iBHjP5EEAOBIegDKVEQKBBCviwIhfAgBDnCJlJMqmSCLnBDGIgSwJE
ZJMCYeIndekQQ5JBg7+syDArk8BjutJOyEIBGWQ5gAA8syAa0AAOnVhIUg4kmxNxZ8WyaCTKtcoE
J/64CCAJWYIMqNMBEGiIGT8yUM0Ys0ffVCJDSoARBzaRkGRgZ0KsGRJ5ZoZ06NsQMmuZkXVG8CEH
sB9JLDpPWfnom+CzpQNwyUeISFOiMiHpRYOFo+VZRH+AdKADOymAANByIRmIQA5hCpEJUrAjMr0o
Rmlkz40w9KV8NKdDmBhQiqBxkRYhoCo/QzYYfROcH+mnOtcZ1VqW8IYpNCVGOMhWd9F0RXZT6EZO
4M90CrKsDnmkBRxqVTQakqIRKWAviclV0qHoq+4jA139GQEYtPQhTISgCXio1ou8cIOl6WaI6ibX
j+AzBYoVp0QwgAEcknGyETGqIjPiSAMS9iAHsP7dWzlk04oktiAMvcENyCDaiESAtBmwwEBMgFqH
SHECGhEsBxXCUM50NUOIvW1BbEmGBWSgA7sdbQmbKxDiQsSvBZ0IBQRLgdcOhLv2OiiDBCfdgzQX
lBIAZXYpUtzu1lchav3rRFrr2oN412CzdVB0BfXYlDwVlw5YwEXuSwYToPckj7SiQU6QT9I8d71l
61MAfLphg6DgBA4uwSYdkM6MnGCsCK5BDSzC4BKUILYp6e+EUbPUPL2uUXzs6YZrYIMboKC3BMkl
KDOCgg6M1QEAyDFEBCCDTP4XJz8mCIzdZVgCRXchOeYjABay0mk6AJ8YMXI6N0zmnypklmDs7v5N
okwQF59Gs/wZcENg4FgtLySd6fykQFAAWovcwAYoyHJPY8CQLH+RIE8uyYsVkgIgk8HNqalxfr4K
1ocIoM5SVQiJ0wlKfIrzzxaJ7aVzbE5CK0QGMWiyFwuSaJC4+MEF0a1BWv3mKtuHvQ8TwJYbgmdq
8lacNriIAGJQ50zGwNQHGXYM+DiAFbMa1gRpQAcYIBHi3teZsT5IhV0DZ/eglNIS0e2UKUJqMsBg
IMdGyLFXTQYVO/u84x5IA+Y9b4ZYm9YEyHe+BSLrgnyYIjWId8UCvJ6NXmSPGfnzuwei5IX49LF0
RvdBZvlTHi+E3vT2770Xom8CDKDHB3G0Q/5ooGLQXPg8tWUV3Ly4R1oS18V//CMoNUBihSyczB1O
iI43TMtzCyQG8c4xJmPdb4MwQAUd6MC8KQxiaz+EALHUd5oJwuaIIPt9YSsPpQV3yT3+eNsFEfKX
wV6QGtCADILOdLKzHABk+/wgqGa22gmi20ZHO+lKb4BFoD4DfRckBX22+tUtbNLw4LpyTGa2mcOe
52nyNgXzLciy2a6QUZfV7RGXfKq9WHKF/PjzHUB6vSXy6hLEsu9p1m3kHQKDdJtLvdLZOq+k3YGI
oLrJCE9IXf/paYHYINgGGXaxK09svA7+7ej2olQt3hC8c2DpIBD4cK0NaYHoWwH5Xv1DkP7PGklb
5/ARwbjeh1t6EZPA/H88dpchepBeUxMFqpd+ublfkPmf+9jIdr1Cfs8QvNP73gDodAnRcfsWEXRG
fwNRAyEgfYVVeL9yYxQhfg0ggAtBAjr1AJ2kEP+UTMBnScMmEJk3ZxI3gguhegnhfKNHEafndw7x
AiF4ECS3Gt2GK9FzEbSXd+MHWUPlaxPReQLhRQ1nbtuHblOGfw1RdAWRdClIEXyXbwqQEDAgArH1
Ai+wEDFwdtzmgMrxbT/jf0vYENLEgxRBA6YmdB8IgtuHgAIRgwzRaJ8HEgVoEAdIBlRYhVYoGzMI
HCmnch3hhRLhT+vkANVnEcu2bsoHdP4gqIYH8YJlFxEfxnQk8XZ2qBBGGGr2QnC+AX4g4Unsp4N6
Zl8M5nB69IOGuHhCmIYIwXwSQWHEFX0W8XCJeG51qBBzaBHu1oCs1C24NhIY2IsS8UBkhGihiBCX
9FjrVk4IOHgMoYxk4HEDoH0DwQALQG0gQWYAEAAwUIeTuIiMKBHHhoVYlyzdo4kjMVQOFHPomI7o
aEJB9FHCOIwE0XKjKBB7ZGrdqH8NgY9f5Iw34IoEwQAAGZAdMXlRhY0iSIj4mFlaOBv2hD4vRVS6
V1rrJH20Vn+qdmiSNxDJKHjN2HFTVxABKZAJgXEMYXZnl3YIEYUHMIsUUYkyCHumcf5lKwGITVRV
DkFapQVB0GZfCTEAx/iRJLiRlWcQNDAAsTQAcVgQKqAC0wiQIyl+BqFwPoh2lEcQB8iSE1GLsOF9
r0c7GWUQTFQBCwhZwGUBAVUCFelgladHC0eEP0d/bFh/l1QQfIeUBACNS6kCAKkATWcQDfB89PZ5
kLdbNqCAQRdVuzaHVFgRWskQDOgZJxeTBrcSUCSWS3QBsxaKO0lxHUiLBtGW9IhmBXGUBPCEeKmX
1CgQ5UcGKNgAnwd/SGgQPCd8dLiYE4GVC+FuIlVrb1Nr0fOVCAFYHUGB8BZ8LLdHIHeHZdeZLSd3
yZRddhcRJaABfvgQOLdh2UgRdf74mARxheDYfdczJ8CZF3vIhywxAb4kEOElEhVZEDKAe+VEBtBo
EAm5ej85d7Hmiv8WEUqYg8tIkHamnWhIiQnJbYtyL+MZO4kDbg7BQg6aVCHRngMRdxgZmwkxeJFH
oQIAmgmhlmQQkrzmEGb3g1m2aw+hjY2pecwYG3XiKQkqF7L3ou9UWRWhWhCxkxPKec42nweBofGY
e6vXce6VTiD6lBkXlb83lcOGVwdxjT1FS1WYolbZjRXhYtxJGTUjo25BjjDRS76EVWTwV/6YEA7K
Qsj1EIO4fwIReCXJoVE5XwSIbQWxAAtApKl5EBK4Z4PZbmNZfwV2EDgHAHVIpf6xeBGs+HI46i9u
UilaqhZyVhPoiU0tJKbfRaMNkaYIAXIiZ3P/KJL+Zn0EeBB5uQAN4AAcgBANgGcaUKpRNpg8yhAP
p2MAQKguqIgN8Xlkh4t8oiiK+ps0IQIFIakstJ4PIUVgulACN28MIG38xlsRYXEhCZAYuWf5FHX5
BpQCsQBL2ZRkwAHeOohJt6pLV3UWkXYmShCzeKUI4YabCpmrIixYmmGNahDAWhDGahH3mhFQyW/t
uhA2EK0MgJRmZgIreJcIoa1OaRClR53i6hFVia52GIURYYKS6RC7EhmPWhNsZBDYBE8ScVX62p+j
dwMqMBEku5QBOUvT1XfY5v5jFpGq/qkRZhdVUGqbhEoGdimnFJtZCTSvXSF7OlGvwSqpF3Fcx8qf
S5l3BFGyE5GXAElOuTcQIxBy++kSNnAAJReo2BixN9uRHWehC/VqJBBbFTA6H/MmdCSvPpsQG1tK
Z4qvlloRSKe0A8G0TQuQKiAD5LR4U4sQHqoSqjdfbFdqXTsQcXqrTEecZMBB5bVVH6QwReSrPSG0
IhG3EdifqcmmFLEAevtFnSkQlGsQJDACI9C2I6EB8CeffkpqK4oQBSunZDBlr9mvA+Gl5gUYW9Re
QQO0QFGvoesRw7oRSReQ/km7l4qzmYSEu7kQbhRAHeEAMOuawVds59oQTf5YmgMBeHUHEeNFXhFA
qX1xR7qrOGq7thABrL9LUBAKEcSVtABZvBKRqhoAkBpgENFJBsvrEvMGvdC7dj0lEfnGss4EeBVB
ARGmQQYBvhDRWmGRuwxqOZJbFG5UEuv7EN7ltHeqWOG3v/SWwXsmEPnbEqpaqmU3okzYcQlrEa3V
uBNFrAnRQSz8s0czvjIsr0kRAZBUEupqb8U1vAWRqxcnfhyQwqw2E9OJZyR8te2GEU04jaw1ROWV
XJd1u1ShNDTMFVxqFHJUtjqRaBSmbRExwtJGxG1GXS7hYhrAAemkd7sFakw8A0uZlC40xS4cWBEW
SVjhwOYrFby7FHdcAf5UXBCjpBKJ1p5ArIHhqqzLmhClSxJ9ihDNtcaQRwaau2AqIMc7fBAVcAGC
NanCCRFAxMmAfBVWvMdREaNPgUpD9BCf7GpoOWsckcgOsMgKkb4dEcK4NRAoUL/OuhGaiakPoVwH
0coMAUQFdLRMIb6mDBVZ3BTBVEWBPMwu3EF4TBHALKETAVq0/GgLgcsdYcv/qJfRyxH39WoUXMea
PESjfMozfMVts4tUscnDFM0tLE8btFwTEW8dB4/h1sbyq5rdXBJ9ixDRur+r6Lf1Bcwigc4F4UhV
tM5NUcqFgcpW4UiQFMUVAUUhcFmYdRGHm3DyeQNQmagoYcadGq2rKv6GCwHET4bNMVEBpJXDyUw0
DzwWzUwVQBRh9OwQ/IXRHh2qF8FjBwB8EkjSJ/HKRue+y/qFDUF20paDLt0QmUxF26QUEi0z8MwV
qrzTsYvOBpxKXK0QKmCtcgwRVwiaI6zSKjGWYGYQGJzSBy1vJMnPT2QSFbABSaHMWK22YVHVrEzM
chTWUVmyBfuEEZFk/3sQ4QrXMLG8Iue+qarWKy3XGEfXde0/3mwz7bzMEb2gnE0UYspLLyRjD6F6
KtBcrxsRWqvYSfd8HRFSAQTOBZG/gZdmRs0QvYV3OLgRFawRwJrZjdPOe/0RNS0Wd+zTCfGa2TVu
BIitlIiSdAd5KP4QsyEhAqRr0gXxuzegR/l22wthtzfI1DWqQv4jFHo9GKijMO68FQf8WvhEYW+4
EEa5j7ALhREH3WTQYz32qiGBlodMBr/rkQPgqRJht6zZnxqhWmmEEUaFEMBtE+ltW8X9NZvdGOMl
AaWnuA1hA0bZTM6tkZlHhZana+0WcG6aEuQqtQbRdQMOkMi80r2VpxhhtBdhpgue3T3hwA5jJxfz
2XBBsaTpmQJhm1T5v9+5EdQdEZM8EAMwAiZ9lEjZ4gDJ3whxAtkV3uL9sVI04yp046Ab3OpNR9KS
LD7eFoH7ECKgmEQuEAFwjQBQvRpBkgtxdB7MbzdwnAOAXjPQuf4EgHQCSeUzll1eKNmV2uVFi56G
ThCyDRM0XeZVvKsWu954IZgSAWO4SRDXiZ8WcQIS+EevlnTeFa09OUsEAHbNhMF697m3qroHTreC
7N0zukJTlNEdO+tfbhPlGekYyyweUxqveRFrXhAwEKs9BecQoXpviMTi/T8AW+cs3kebirKpOZW4
7XsOodAIQeMRoV+9lEg5ocyOTso0YzLhThbWBokXQWfbOKWyyHbGTqIODnK69ZqLneUfKu1kTI97
rrJ89hAn7mGi9e9tButkYLnSrF+xPkEv3hJoI+ln0Sh3MuF6cQCvZtlpqIZXOYuk9u5kkGQ5J2W/
Z6F4x9gIgf7BCbHn5ER3ODutAhFvR+55CYi89lboDjHICNHtti4TpVzuSXM+PP8XxNa1PrfubM7x
mZ6A1G4Qa8wQkE0Cw5jylhTlHxmbrft32VUDeL4QFu8ROL/wJ3HeM7U/El8ZLpmS6h7sDpF23vkQ
qToRJyBa6krfHpdt3ekQ2dV1pshqW58RZkS0jM40Dt8WghIvP48XZZ8QBXDpEFFsTNoQMu6IoAUC
YIuzUD73BKHqVa/yhha1AJ2ZIwFYXk8S4M5VYw49sqFiNPDyCUH0EbGY7o7bn1fUMTeIytoAHtxv
UIet+46Uhk0Q1J75A2EDwwaf7gVrGo4RCK/zgF/4DTwszP7PFiEl8Fap+CdKhXOYY8YeAjxmgp8n
xgrrYiZg+++bTNwNlPNt+QfRltzHgDZAoZr+aDvZajh0QQwdOiP0/F+j67ohpRAxqC9ojQABgMzA
gQcG2riRMAXBDg01NGhAUOLABg0ZQIw4kQyBAR09ahygUSONiTBMEowhkswAAQMChFRJpkQJlTPJ
OHDw4IGDDDE1HghBRmeGBz6NHkU6MEGCpEmXNoUaVepUqlWtVn2KlOlVrl29fgUbdiCMqy9ekCGr
MYAAtgHcDqRRQ24NlRocNnAQs4MKFR0YXBTp0aMAuVJTakxL5rBEwR9j2qyZQbLOvFB1Xq4s9ujS
rV05a/4GHVr0aJWdfWYlnVr1arAxXCeWCsPsARGwJbLFHQBADJJJIR5VkcIvA5UDZMjoSIAgjcVJ
mxNM7JrxDMECjs40IVLy9qJQt0/OrBq1Z9OszZ9HL7J8zPXp3b8f7fp5VJO2RZp9gVtAgNB9if9M
aAbkWJpoPqMMhG0x4waECSkTaJroO8lIoLBCCgkawUISMtCAO9bG4wpE+EYkUTMR1WuvRBVXNIoG
5q466SizxspNoPcIIMDGAqVzTqST1mJrIAE7sg4qyAb67gEIVKJwBI047DCD8EL7zKulEGAxSy2t
SlGjLrcEMz2gCoPRPo3wQytGrw4w4QQ3T6jKBp8MVP6pvoKgyy2AlDrSMaqZIHxgMguk8nC0E7H6
MkxFFyXj0IkSZTRSMHlUCb+z7CTtTRRQiIpMH+kbSISU9Gsrrq5KuCDVCyzozrLtqHRUKgRilbRW
LSFt1FZdt5TPqLPGMnMgHEXblNOm5OqtpGDrREkAk3IbiC6uMsAAA2oHtQyzVr+iNapudwV3xG+/
DbdczV70CU3alt0Ix2G5qui3iTZN4YammjMI2Kaicw03iWqQ06oIqsVg1agk3PaqKsnD1VyH0Wu4
4YcnpirZOtnVyF134cVIXpEScm4xSjGWKEYBYghSo4TsFckBDYz67gISfMrQQoTJA4tcincWD1ed
ef4GWqO5YsIUKgJm0LhBo0xgummmT+jYY5VWRqq5xRLzl+iBsp46BWNvwilsnwpeSQYBNLTwySS5
/HkziYOGm0qt4qb7qHy1pupopN+dyGmnf4K6oQ4wSsqGgMsuUiJKr3arrcR9zFOkAw5H4QQTwhbb
KJZYehzmyRDNue26R8fZbdJPPzAGkqe2dwbX+f4TwqYEx6jYr2OiazCloUurV1L5i4lUtgxEiGUy
NEC+wylBYksw0hYuHXXpU4t4eusVqwpkYd0dgIEjpaJd6mIXKq46vAdCWT/gVToZBmgtnsjr45PH
ySgBjmt+fRPfdpv/6//3ls/8B8Ba9Woq2iMIR/5wlIDdSSVqGVGZ8W6Dm47ojwx3S5Dq2uKTk6Uv
caZSSeWQJ6XlkaFpJyBAv1oCmgTMKnQEhKHc5hbDncEPKpsSiesGgKMGasRvbXrTCQQ3OAh+DIFk
6GBLesgjk8XAbALok4/SF0VpxaRDD0Db98ggA5S5RCyiOw0YaThGo1SPjOEKgaeigsOJJMQGrtub
AlTyN58MUWoEudtBDsfFllhQcbwjA5C4YjgJWqWHChsgexJ5RkaWJilYamSt8hiVE9yOIBKkDkf6
1jSoNIQDdySIFm0gFyUC4JDok0jjVniVyR2RRC60khgjOctHCZCWcWtTBI/CtKqAciJaHEh1Tv6p
mMPopyNdQQgbwSYl88xqkV565i2lqRSnTHNn2YlfITXyJ9WUAJvBpKAXU+es3NhrkgdMgZswV7+j
EIht3JKlNeU5rmjKEz7AtKTkzvPNsnVRnEd5zQZTcLirbEpC7Aze5oZZmnjW0p4P5VI1IVorLSoz
S7wcCB/diRQYqJAgKJCMV0YomRIyRokb1Uo9JdLQic7TKSptKWkOMDOJWFRLGF0JSpOyH4lgridX
gRJJ7Yc/rikSpo1iaUznaUalRgpOLDoAMPlJFTKts6QHI6mGsOOmTQ1Ahf9E0QubOlZvvZSsYXrq
RCJAAba+R6qDRNJ3rhoa+awSmkeF3ln1Wv5Gpu6VRDiVSAQEO9iqgAAEEpHABCbgJ9kNZKoHnN92
HNBY1XQxrPD0a2YluhnNjoiyBGFraCNgFcMaVgKJPW1UAGtCrtwgqDihKXzyyrajdtae5EqqbRkb
kwr0lq2j5QoIFKvY1KqWnyV41QFBKtTYpie3SqmtbiHaV+mOJqo+qYAFfAvcqwx3uBKYCk4vo5Oq
cIplzf3Qc2dbXfau1Jbtfc92BcsV7xK3KtnZzgXIS5XKbaoE6KVebZ8LX6VCkrMERk9of9sV7552
sVQxAcIShpQdDkAyGvBAevE6YAQrlZ4dZk0FKCBiCnA3KqUtLXHtWxUJ/dRoO1QgXnomVv4Q19hL
TYmujUVCYraCl8ENBupkLiAVjXGEmaJZL1WSrOMa4zbHTCYIiU3cXSBbJVD6dXFTBpBJHEkJwLGk
MZTFTBDqjrkrhwXBOa1S5aqMV79RgSMPYRuWJUvlSmbGM5nfm+erHFYzE/CxVS5wM6jEOUd5+fJU
6mznJ/P5rGV2NFQMCyYJvZnIyhnIhUIUukZH+tGb9fSJV5NmrCb3Kp9lNGZDveqIdbrDfibNpAlF
lERDxXKI2vCqdU1NUO/aJ7AGjayRwhPkyYSmtU5KPnEsYFf7eq+4dbZRSB1sYBvFqhBCdnFwcwPy
BXDDzY62XyEdbq8kVrEEKe3BkIe5TP5HhXP7Wehdw0xuX3843BHobQW64mAHp1sqyVs3orM9EVKB
la+cpnfCczVDX5d4sFOeSn0DrZFpWzF5zNR0U5K4Qb4yW+Efh7av8+1b+lLguyLxt1Hoh+ip1HUA
UXQoPMH9cfa2etcWWJVvQxCUqoR2xRIR9lHElvGoqNCP0PU4zZWu51472gIF0y5wdz51qu9cBFcX
wTl9flofpxwpO6FMlmWO8KWXncxN5zPOKyBYCtC3wRKodlImQ5mwwFLVZsc7rw/s6XwvmMpsdpVc
c0b2vBceqSnlu3Z7C3GpTMDkw63KSI+MSAMjcuaG17HELg9RnGu3xFNf88mpwqHJMP5+2bnGfOrd
i3YoVyDnFAh01XnelJ9TJVAThop6Oax6VpuVz2v3iex3ruYSLbqsvEc+NFmf/AATnvnPX7jpoP+8
Fs57+s8f9/VDNGDjaz/1Nvd+9MAcfvJrnvygG/v5zx9y9ft+/O1vP/jhj6Jvz9/+7Lf/4WO5+fxH
W/7q7z73678BrLwyWj8O478BTDj8gz4E3D0FNLz/Q74AfKkEhECaszsDTL7oqr4L9EBHQjzMo0C3
KcAPNEGmY7iyG0HpO8EWVI/lCzfue0AXvD4J9D/ds0AaVD0G1LUW4kAdBEKkKEGG2jUEzMAgRELl
g0Ex48AcTELsW0IbW8EwcsInbP5AAWSyKQwjK+RCLGQPKJPBKuxC72uYI2yvO9u/MVTD3Mu+zNJC
RVrDODy+veusN4RDOcRDHPPCT6MzMczD+TM/vbJDkXCmPzTE3NPDsQrDQ2RENtzDaULD92vESYzC
s1sqZvNDSrzAQLwlB9TET0y1FGQkTwTFUpxDDTwjUjTFVUxEFiSgQZQ3VpTFZatEuIlE8hjCWdRF
n8jFG5seVdzFYKzFGcySRRTGY2xFOgQaWPRFZHTGWoy+nXHATHxGK3SyifHBnDHDauRGVFRGW2HG
mOvGcUzGgwPHJqRGcoxDnUnHEExDdYRHOyvHYkTAeLRHRaNFeuzDdrzHP+TB9/4IRzLbxn4kSFH8
QtkCxoJUSEd0RfNAx4WESHyExnfkloi0SIk0yP15yIvkSIZsSOuzvI4USXmcyJSKroEcyZQ8jXlU
so1UyZfMx6NASa3oxZaEyZskyYzsuD7EyZ48RW+kwn30yaH0SHM8yK8oRKJUSkREu1vcvqWEyp9c
SaTjyai0ypjcSee7yq38RhCURK4Ey65sRtoKy7LEyhdElJo0y7Ucy7ZkSraEy+Xzn4CMy6g8FM0j
xrpUyvZQS+jSy7/MSUu8Q8AkTByrvBShy8Jcy85Yj7xUTLDcis5IysekTEbjDH6sTJzEzMzkzM70
zM8EzdAUzdEkzdI0zdNEzfLUVM3VZM3WdM3XhM3YlM3ZpM3atM3bxM3c1M3d5M3e9M3fBM7gFM7h
JM7iNM7jRM7kVM7lZM7mdM7nhM7olM7ppM7qtM7rxM7s1M7t5M7u9M7vBM/wFM/xJM/yNM/zRM/0
VM/1ZM/2dM/3hM/4lM/5pM/6tM/7xM/81M/95M/+9M//BNAAFdABJdACNdADRdAEVdAFZdAGddAH
hdAIldAJpdAKtdALxdAM1dAN5dAO9dAPBdEQFdERJdESNdETRdEUVdEVZdEWddEXhdEYldEZpdEa
tdEbxdEc1dEd5dEe9dEfBdIgFdIhJdIiNdIjzZKAAAAh+QQACgAAACwAAAAAgALgAYfGcBnamRbW
shzEvimjwkuUmWp/f4N+fot/foB+f355j3hqtXBYvHU6u4YdrpgSqaINm6sCd7IBYLoAYckAg9gA
ptcAvdoCzuMG4OwY5eAz6uVC6vJJ6utZ7t5q4N55z+5+xPx/0/1/5/6B9fyH/PaT/umd/t+o/tOw
/sqn/rmg/qu05qHmsIjynXv2tnL30nf85XT683Xp9W/Y/HLe/obi/pbb/qHT/qvl/tj+/v7+/v7+
/v7+/v7+/v7+/v7+/v7+/v7+/v7+/v7+/v7+/v7+/v7+/v7+/v7+/v7+/v7//v7+/v7+/v7+/v7+
/v7+/v7+/v7+/v7////+/v7+/v7+/v7+/v7+/v7+/v7+/v7+/v7////+/v7+/v7+/v7+/v7+/v7+
/v7+/v7+/v7////+/v7+/v7+/v7+/v7+/v7+/v7+/v7+/v7////+/v7+/v7+/v7+/v7+/v7+/v7+
/v7+/v7////+/v7+/v7+/v7+/v7+/v7+/v7+/v7+/v7////+/v7+/v7+/v7+/v7+/v7+/v7+/v7+
/v7////+/v7+/v7+/v7+/v7+/v7+/v7+/v7+/v7////+/v7+/v7+/v7+/v7+/v7+/v7+/v7+/v7/
///+/v7+/v7+/v7+/v7+/v7+/v7+/v7+/v7////+/v7+/v7+/v7+/v7+/v7+/v7+/v7+/v7////+
/v7+/v7+/v7+/v7+/v7+/v7+/v7+/v7+/v7////+/v7+/v7+/v7+/v7+/v7+/v7+/v7+/v7////+
/v7+/v7+/v7+/v7+/v7+/v7+/v7+/v7////+/v7+/v7+/v7+/v7+/v7+/v7+/v7+/v7+/v7////+
/v7+/v7+/v7+/v7+/v7+/v7+/v7+/v7+/v7////+/v7+/v7+/v7+/v7+/v7+/v7+/v7+/v7////+
/v7+/v7+/v7+/v7+/v7+/v7+/v7+/v7+/v7+/v7////+/v7+/v7+/v7+/v7+/v7+/v7+/v7+/v7+
/v7+/v7////+/v7+/v7+/v7///8I/gDJCBxIsKDBgwgTKlzIsKHDhxAjSpxIsaLFixgzatzIsaPH
jyBDihxJsqTJkyhTqlzJsqXLlzBjypxJs6bNmzhz6tzJs6fPn0CDCh1KtKjRo0iTKl3KtKnTp1Cj
Sp1KtarVq1izat3KtavXr2DDih1LtqzZs2jTql3Ltq3bt3Djyp1Lt67du3jz6t3Lt6/fv4ADCx5M
uLDhw4gTK17MuLHjx5AjS55MubLly5gza97MubPnz6BDix5NurTp06hTq17NurXr17Bjy55Nu7bt
27hz697Nu7fv38CDCx9OvLjx48iTK1/OvLnz59CjS59Ovbr169iza9/Ovbv37+DD/osfT768+fPo
06tfz769+/fw48ufT7++/fv48+vfz7+///8ABijggAQWaOCBCCao4IIMNujggxBGKOGEFFZo4YUY
Zqjhhhx26OGHIIYo4ogklmjiiSimqOKKLLbo4oswxijjjDTWaOONOOao44489ujjj0AGKeSQRBZp
5JFIJqnkkkw26eSTUEYp5ZRUVmnllVhmqeWWXHbp5ZdghinmiwmMqWECaJZp5oRpqlkmmms+CGdB
apIxZ5wI3kknQXriCSCaCNR5kKAC9emnfoYiROhAix5aXwIIQNRooZM6yl6bElVKqaXvJfqQpoyC
yml3mF4kKqOjkucpRaeimup3/qtOlGakn7b66nKlaqSnrZveOl2sshoK7KC8+vrbsJICi+yexiKX
a0bL9lprs8QF2lGarGZKK7W8YbtRoMUSG1G03Krm7UbkNpRuuOWOli5D53pU7LvtdhYvRuCWtC67
9Vp2r6nWprTttP2K9q+p/OoabsIFK0avQgevtG/DmD2LUcQvTUyxZA9DzLBJ8368MV4dK1pySguP
nJjFCIssccgqE3ayQRj/pHHMfOXL0cw1Lewyzl8Bei3PN737M9BaER3q0TrdjPRakDJt58BWOf00
WTVnmvVUPl8t1tbjSl0UvWJ7DZTSoZpltNlZgV0r2k5ZzXbccMPNdaZz0y21/ttlyZ33UHXbnTTM
fwcF7t5le9V14TzZzXdcazOOk+OJ90245DE9Dq/md70bMOYvI+4Yu5WDPujn35b+ltGqmx644Hax
brq8gW8W+ewtD936XovjHrbYsA/mt+8m6767YMMTzzLCraVMPJ/AB/9Y8oVzvpD1Bl8u+eu6Of83
9glJb3vvV4Mf/vHja420+cSKnz3eKlMe0wEihHAZ+e2yT3O0GfSP0QQKCYEABzjAg0TAAhUwjOy4
pb/9ReQBEIRgRSQggQlUMCIEtF8ENrjBw9zuVTpDF+f6178LPKAiE0ghBS0Sggq4sAIUiABiFka1
Q8mvIiTs3wknksIeSuAi/hZAoAtlOEP8mSmEGsmXAASAwxzu8CEgiGIPVQhEDCCQAoz5YJgaSCc1
LVEAA2CiREhAAhI+sSFRBMFAprhCgtBPBHCsXwYLSIYIXMACFJAAFrOovi9xcWmC+uIAwhgRMg7k
ASRcSBoPwsYfYlCALxzi6IxopRsaJAYx+KIYHWJIgUTwAQ44Y0EOoEaETIACPqyIBe6IQCJOEn6V
5F5CZoBJMAYAIiQgSA4z4ACJRJECwKQiRSqAgTtWwJXT66OULImQG9yADLXcZEM6KZAMaICEvYRi
FMlwSlQ6UpWtpMwCmbQ8i4ANBQMZwC1xWRBrXtMBEHDINgtiQYuUMjNa/jQS5VplghNcBAKJLAEZ
sInGe3Zknpqh5I/+KBAkNkSgFvmkBCGyyJAYFJ/BEhIzH5LLamZgIjk0IUQOYD+SXLRipPMRQ+3U
sVw64KUvzUAAZirNhOxSlDI5KUaVWaNyVkR/ucTmS2cKAAA0JAMRKGE8J9jDg4KGbOhr0D43IlBr
YlMAMw2AURmSQ4v48IIZoYAL3wfLFq2UpR8pgQauycsHLHGmDoGgCT9KkSnWEyMbjOEeQ0O6qBLI
bg7liD/XqgEHfFGrDsFAMedaVzamsaIRASYwkfnUlJ7orO4jwwmeaQKBYHWrDVFsCR/QWYmwEYAX
iSQMKVtZnoKoboEF/kk/U6BZdEpEsRjIgAUEUlqI2PWbFaFAEFfLkAPYLqMd8imr/EoGgTqTDLaN
SARE+0QT9LYhv81IBa6oR4VANH1ltRBmM2uQjpJhARloAAMocsLvksG6D7HrBCA7kRdONiHu5cw4
2VQ28iIEoi+VwEvXW5HrvtfACUmlQB5bXyHG8CDwNRhy5TRVmFQ1hwu4CIJNkN+SVMCYDy7ICfxJ
GrI5SHB6AgBW12kQFJyAwyUgozWziZEToGCt/TOsAGoAkSUSBMElKIFxUfJC1moWNX1N0EotllWt
3rIGNbDBDVAQ3YHA9KUaQUEH1kpTrNY0IUskJG8RTBMqu7E0Jv7r/kYJclitxmAhVuWlA0rQT4zc
wJqaxOqbFxLGQYqZtzcxM0GCfJr98me8oNIkYhdC2HeWFgW0tcgNbCAAGBwWmgsRQCa/WJAIm0TI
CklBlZvb4RJPGD9nRWtDFA3ahDiAsFjuJzonbZEDYHLTYtwzQm7N6U6TuSNBLvVAnutr1qTZPihO
11tbrRAc01ggZrbBRWBg6VvCQCCYTEgtBwAAGvC408ImAwM6QOCIWPfXBHmmQUjsGkO7Z8mplogz
h1wQH696k9fGtq7ZDEYwCgTK3x4IqAnCgIIzQL0NObenB0KAARAg3eomiIspUgN6J/TU61lzTCYd
8C4H4MsE8bgY/qk9kH0LxM+DLEiUFWJwgyNE4egmA8oHYAMpH2TUDvF2wO1lWfQoN1hMC6O9B2Ld
IJORBDF1AF0T8u08s/ggTtd1vqFJ7wHIQAZhfrpAnBlxgnRABeQu+IhHrHCHNNzhDUeIoCNi8taG
rTyptpufsUoGUU/cIFd2gHXZbZAa0MDpCqn0paW+600PQCHOFPVAOpACsB/cIgOYwSDTXpAURJrt
bZdweEnVX9hpUp0K2SWWoZuCrhMkmkM/CCYtbW+pk5wgMsikOgG+ECpTWQUqKHgDKBJkAsxA8pQn
A9clAoNsm0uh1Yk7rzggkWiC3qY45uXebVtz1VebDFO3Pt3z/m3y7J+81StnSAM6QP4GNGDEILC4
r4v+3d9PngDEJj5skoydZPPK/PgHd7BjTAL+4z4GiJQBOEUQzvZsKMB16udZ+PYQJHdrJZd5BVF9
CTF+5Wd+MHeBC1cQBLCBHDgR1OZ9BFEDIZCAbjcuyfc67IJ/+Fd2CwGAEhV6vJQQtBZyX7Rnr9cQ
U7dvEFgQw3cQ5NcB5ncRv8eBh/cQL3CDB+Ftq+FuuBI9FkGBHJB/EHFTJAgRUJZOg7REhOcQOUhv
DsgQ8ed1QLh7FvF7M7CBCwEDImBcL/ACLUgDr9FzygFvLvOD5vdsR7VLGkEDuBZmmjYQIJgQSFgQ
SsgQdrd2/hsxhEVoEB9IBm3ohi0oG0wIHD+HcRdhh2Q4hWYEAcFGEUKnb4aHbUM2iApBigOxcw3h
YmNHElMHiQrxhRVRhZVBf8Fhfx+Bf0uniRmwVGMWcwYxd0XIa3/IiBBhijInbRNBdiaQfhvRiI9Y
isb4ELTnGcfWLckmEqEkgAOoEHJlAQ+AAcXWEELnZyXnb9inemxXEA7nZ6YnEAW3AAUHEh+3RB/4
iK54EI1oEZgEh+6CfLGhfK2jQ6D0AEdXkAZZkBeQkHf0AB12bpmGdWC0iPomEKRofA5hkUR4eDfA
jAPRcvHYEW9FU9FIEIEIEbBoGnI4G/uEPk60jQiBWxkg/lIkmIGXJHsSWXKAiI4mGQMzF3wEsQBA
CZTldhANoAFByBB+93eKJohr+IwUcZKpMYnH54QqEX0PwIuhJVomRGgvh24CgHVhhIrYlpOXlBB9
dpORJ3kpdxC4J5QMwHcEoYJHyYM2MI1kIHhvxYjU5pQeOJJIZolIFj3MNRBx5gACJIsGIVoWQER0
RmYchhBzx0RiSXXYBoKFSBAoZ44D4X4EUABhKBC4pwLwKBAvZmCEhX+2B2nPVZcjOBCalpeASHJt
WBH52BCIqV8piWYapxLbBQElFREiZRA02VxQF5FhhIxp2HcG8XlfNkgFMGwGIZpDKRD7p1ZbZpS7
l5o9/ricrRcD18aXEQGeCgFwv4mSthJvHlRhL0FfHOGQBTFwA3F1fkgGNheJKoec0GR4WgdxAqF4
EaEBHLBl5geXCjGPH4d9MHCPEPGIt4ltNMCPzXM9czKYJKN8LXFKA4FQIzGcsBcDYLlO7ah6Jtd1
sQeWk5luzHh356UCDLFWc3lvh1WSDgGJMgqKKrko90KhdQE76MkQFGRBEqChJcGh8dlv3/aZ2saD
sGeOqEiOwlkC7/iRjCaNSnlpEmGPtVmTOxiHaTMo1GiLL9FIGFFBKQQR4aZyR/oQIyqDWHh2CMEB
awWP01kQDlCUL5puNXeFd+mdsIkQqScQbpilBSGo/hYRZA3KMbGio6vTeYpaEJIlTATxWByZYEDa
Rg7BlQyBjJeHlDvHAKPJg+rGgW5qEAsgmms1p3HZAHVqgKX3TCJocXjJbAORVV7miG0YjYQaEcoI
Y58xoZXSqGqBaDbxqHclqb7FRhGBqQXBALknEDaHc+PZkS13czKnlj45EKEJlA7QAcxnEEV5mg5g
Y+jUqiF6l/vJbyH5gSV5hDXKELZHoF9KM4riL+oZEyLgqN4UpEIaX8iarAlocAgnfNAVEVHmkQzg
pNB2Au7ncAqAEG1ZbhwQsVzZaBY4YohIEVGHEM94qAZxiLr5qzgqTp1nE/dKED4EqTzUrxhhsFsH
/q0MUarSebB9VhAqAHwDgKQC8akHEWwaIKB4iBF4SXcGMZvYV7IPsZ0l1iq7EhnCSrJGKxDdhLIp
q0LAVRHM6niPJ3wsKhFXK6dzV14SOWUVsVY/mxGvuWiASrTReK1I24+LA6yKc4058bQDEUx3hUIq
exG4F3YEsbUS8bBg+WcDMQI3p6ItYQMHAGUfN48ISqPR+H6HJ2Xl6l3BRgIHkECvZE52kkWMuhNw
hBDe9D95axF7e3Dl5reeqAIyMHkHQbgvd6YiwXXqFpIBwH1+SQaieq0JoYqleV0bBEN7VUQKszL1
qhN0CxIKlhHkN639iRELYEv0aRDHSxAkMAIj/vC5JXGAAquAS7ml6gh810pvqemydStZERC8wkM0
/gUWlQiYxisQ0+sROkURXxd2Q0m+zcasC5BfYVieCiFHBOQRr6YBA+uaQQsA3lsQZriBEml5iQcR
kRRDkjq/saM06xs0jAq3EnGv8XtQFAwR1hWauidxEfFSheUAWUsQ/kkG/tsSd1iny7lp58pnQ4iG
dbepETFcxFUQxgoREfBCYcFF7ZsXTVsUclQSH/wQEYa1IlbCeZeJBWFbLbwS3yqFIdhrEcGBCrCB
lgdEIIa+PLyvoDtZ5xu3IpSeI5sUH2YSHKsQngav8KoQA+yiKJwQvogSjVZYzmpcJ/oQvneG/gTA
AHfMEPYVYtoVSUZWFRaswYrcuUnxuxDwwzuxcCN2EHHcbLBWx/9lXi6hVqe5e880g2X4e6L5cBix
XS4UQyEgxjlsTMfUNup7wV1hoUyhWolsEKSkEgvHoZecED3rogzQsAlxvSTRmvhFBpn8TDhchqWM
yxOxSlfkSgz2zMUkSVVzNLLMFQD5FNAcTvLEysBGZ8LJETdmlOvlix28EVM8aFZmW/grESZgwwKn
rBBszQbBnoSsw7e8FH+UzVsBplBxAcXkzdo0vz8MQxVBzzJHpBNBW2sHu+vMEekMaMisARerYe+p
0B+BzwmxXQ4mFYvMyCAtt1SRkBYAAVVb/tAEoVccNBEJiHY3KWmhXKdBCNEl4boJ0XIwJRFxvHAa
LRLgXBCrBGJQsciFsc1WUWQ7TBFRBEn2tc9+nJEZEco3cGWqCrsnwcnL6pGjBxHw6mkMHRMfZkWv
zBRC7M+w/BE9ihMfps8agcpLDXmQexFRdgDImMcNgNWf9mtBaXBd/RBwTHSDvBBtXBFwbdbYLNJR
QctcoVhX5BCk9MFtHdcTgXsLrLsNMY9iSbFQ3BKtWWfRiXt+XbYLwXcqSNEYkcTqvAFJ0c+K/RRI
7RXQXNbfLMbC1UpQjXhbm5YMKxFNtp/j98uknRLliXPZGszDrRDsJpcNMNhoZBICdBQh/i0ziYPW
TzHBLRTBuQ1xN6AC7tVwBKAAMf2KfQhXJEx+ye3SGTTRA+G/y+ypBZfeuzsQFHjaGqHaGXGvEd04
iU3djjwYk43QtWd76qZ+Zzd5442OeSYAoHUDpffOEm29Wl0Qx/tcfqbXC+G3PziGHNFUxSwUrk0Y
qKMw1r0Vq0TZ/WSxF30QvL2BwiyIr1d8uOask4azJEFnl3y8NnCWIBcRfkuBHK4RFDTkGUGmqFUQ
+20TI/5Taz0W090YFSABDBlk7gkR1ceZCY6g+Xard8l6AABliRsTK47TmDlz8NjZgB1dy2vFXpVd
FjHkPyq9PXHWDrO5zIMaSKuWgjgQ/kQ7EACwuCBRlBVRegUxAlo9SGoZRgY3ucqtbvXN5ng7uqY1
uuwNE7H82lUjLcmC6XAhuw8hAs7Y56752wJ8hwS8EEB5EMTWZ/l1dX4WAC3H6AjhT88E5JDeWFP0
P6gktZXeErGcTK6iLiV+F7a3zMWVtgpajkupESOmqi+lqv0XZOQXYR6JEJTWbwLAdzMgA2oZs9Eb
EbMmEJh4EAeA4Sb7VfZErMDV6yhD55BBKKIy7HWRmhch6oOaoIBHEVxne5qF1wYhQB7gASzL4jNX
ZYMUACJMYHrqENQn7kCIX+bOTW5OUYsUtZZqE67N6f8sr+0TGue2itOWoAjhjF3+/kWyOqt/ysI2
50z0TrHD3bUu94sLG0aQxpY6+28PIWh9nNHH6uEMMcHnnusYzzTy3jfiQikabxblTuXNaIz1yJcm
nxCkPhB2LbkH0Wh/Hdpyiqpk4OoHv3UJoX4Q6q6nqMT8KrUIkctjbLc9k9hJrzjn8/aD4Z0jueUY
22ZkYJfN1gBQnfC/tu2SJ03SduDDZnoJ3J/q9m2f6MYrIVmhmzlGfXH70+SXAZV6maD2/hAL3m0Q
8a0MEfM2JhDq93yYeXY1ZfgOEXE1AIwLEdYcsU3BlNIvszNyH8TQIyi1vxeWfxAFIJ7FSG2o58Q7
De60BQI2LnMzJ/hl2RDqNnM3/llqrn8RHO3rT24vmg49sgFlD2qE9e6GteTlA05lJ4B/MHV0Cs2s
c0psooyZM19TCz+WDSFtXxlmMa3QVb4R0ywTaFP0cLE1uQ8XAHEgRA0yBQ0eRAjjxUKEDR0aXPgC
xkSDAQQICIBwoI0bHcmgAHlCw8iRDhwcLJHSBBkGLVs6vFFwwMyGM2TMGEDgIcGDMBAeeGhDQIwY
Amg2TPnQxMqHTR2GAAGCjIMMTq1exXowwdasWLcm6BpW7FiyZc2eFQvWq1q0bd2+hRtXrsGJPs1G
rIvwIsYAGQsCJcOxY4qDJDU0aNDUhEuXDm3MhFzz6EMaCSkWjLFTRtEBfh0m/v1cwuCDDBkedBVY
0AHpByfnduUKN/Zr2rVt3y442ypb3L19/6Zt9+4LMsIb7r2YkUYN5jwfkjTZlIEKFYwdQsbuvGvm
hsK5N4R80Sno0BcenD8v1qTp1sANfpWt2/18+vR5N5VfX/9+4ERjGBdLoRcOEAHAngSAYa8AKuvq
sKuoq46BhwaYAaeZlPsuqwzpMogohLCbSQCrVHLogNJOPC2sE0tL77f8znqRPxlnfOs+/GjEMUe0
/DsrL6siIgPBBAUA4DUIXzrogI5ukEEGowY4aMOrpCwuyoMotLAzrEwQraEVSyMhTDFJMGiEMcPM
YCQWXbQRxjZ1hDPO3d5E/ihGOe+kkQYaqAzrsh+JKw6GzC4qsjYJnarwQoR41NAhP4uSKQYnJ8OK
vIJWvAACh8Ic4TkN1rwNvhoTQABPU091iM46UWWVPoGYa8vPpoD08a0DTDgh1xPMssEpPh29DLBA
LdqLDJso7SqlLslAsaqxQK3NTrKkbbVaHKnNzVptT/VwVlplrU1XkMSC9SEDrbJLhO+Qs0g7s1K6
IF4LWgzrPNOclUtUtxDAdlt/9VP1vX8HlpHRWek61yACFtZpLpBQCIs5Bi3rs8MgkcOIDHfNygAD
jzGwQCz0znMtvrj6JThlNtdSuWXc9vyTOAITVpjhnNpCrIPEDgIphZga/jVIWHCd8m6oopIrqIZe
zzrgYwwuCFnFFdtrS9+qUXY5a9sCFlhrr92a2Fyam2J4YSjPQiztnRvyCKtuyXh7bIrh9k+8g5Zs
iiqnOvY4gwvsbsjMM79M0c2Tuf46cdr6xVrxxJtrqtawCKjQ5i2XwnypXNVGzCm8p7SyILkT6hBw
tlOA+KD1omvK4weIFeDMMB0iDUWzrL7acd3nQxzx3b0W1lxebahwhoUVQCjzzBs6QNcOVOiAgc6v
smFpX7/7jiLYiYYhgAGK/cl6FE5YySTzS24KO9OtgjYt37PC/Xf5o+39/fkTJ2r0h9ounoCblV1W
V6AHPcQ87CrOwU53/uzCKHaJyCnhGYpj2kYGE3yJdU3BmAPpZ7+rNO5+H7wd/EAIwl9dZYJkKFtL
AkgW6khvbQ8jzE5qAEHhWSyDTsnggpqCukupKQPoc0zd1ne4w3FwhEd0H8uQqDiDieWEMqlQAsyG
Ns6tzSBPNAiIvpckDpXuaEM8iNEURIblNGV8JvAhECmouZjUbQCFOhm/iLhEOi5OhHXMWtjEMq6G
EC9RC7OK8nClq811wJBp298TsQQZz2CGO4/aDNKux5mDbMxLYBqTpQwyxjmOyoh4BGUH7xhKfw3E
kljh491usLQ/Iq8hy7NKAwypMyv+BSHVO0iTIuOQ7C3QSRr0lVH6/siRO3lwTqRE5smyUqpkVit4
YjlB6hDys4MA8iCw7Mosp4cQTdoAVsfS0kMy5JPtMU0wOpKjJ5u5Trcw7pPsZBWu2EZNxTClLIh8
iCaTBsGz8XJdT0IWWTiSStWUBjj8emeqEgpPhnZNlA11mT0N4rMR6ZM2JZCoTNRnFQ8hhybPJMsN
UpCrgqDngk4BAPjGYkz8sBSiL81N/WD6L31KsykgxU1GvzepLU6JKMhJgfXQApIKruikDulLUoHZ
QZcqdKZPLYvvFgrV+WiSoDpaSi45E06fHi0jKMBiWURi1MI9BGONdEpTnUpVtsIGflNtK24OQCae
2TROWS2IACa1/lQcRtKBtcMXWhyQRqsIhV1zgut71BrXl6IssYztza4aQoEK6OcA+pRoP8MizKmY
pDVqLEuaSnMBMakkVyCJiaCGhFatPDamkIXtKI8Z2zhJFiERoAAFcKsfzLZlaUYFbW9Wq1DXxo+2
x62TVJFLI7wiJLe5jUAEzBIVhExgAmLRZEZDyqyprfA3rCXDYpO7XPKmVbblrepDKrDe50q3LFGh
rgSsKwGxNLcg2h3LDUhSGgfQlT/Gjap40TtTx7p2wJXyrkEqYAH2UsAtILDufOlbX4kmOCw3QIGa
TuLf+ghYsQcGcarOG+LXXNYq662Abh3clgjPlyzNtZdBy4IC/tZxGDgAnpaHSfxUd+5YP5TVbXTd
0uIJTPjFJR2ZWcYHkhLYuDc6Dq+BfQxVZj50ysBJMXvdixYiS8DIYzHBBaZWVrGUxgQeuLGOcXxl
EveYzb1BcYq3LBb4wjfC8vUyxzBF5qt8zygPQExgt2ZgKL+5re+TsqEbkmIgf/ksRC7yWb4kFvUN
gGShUnOhFX1oqSZ60wUBQW7jAmlHl5lFFxCLRwXAIiePqpOfhnV4RxxrtEgFBDg1S4tLLbIHmEfM
XRnAT42yatO02k3FJRWtlR1lJS77LFJ5jYvRMlr2hIUokwqAaSBg7JVCWdPOhq1ywf1eaMupY7az
tgy+Z9DZ/lWtiOMet7jhTeff3FosGDiRedpi4bBket7z7vS/u1Lu21D33ucWNFnIdzt/CxzgbnX4
VQj+GoNjZbAaKEiTiz1Uhr864vGW98cdYm/aVPwqJtGASUDDbQxeMYbuQ7anRU7ekIu8snCZAAWu
axD4qud8JWN5QwCgVKG+ldAynzl63RzxCLD35mjxcpHp23OxGCblrmk3VpIaAADA8a3vTnrYaw5v
3EJ3zmXp8q5BjeuCWD06WceKgvri9ZYePex3f61XHL7gOJ99LKQeuck9VZKCBP04cmcq2PG++IDP
2wJQY/B6QxCCXOc2woFvUMrJAPessIvurbX74kX/Yb3D/psC8qrAlie/etZPXgSvFwFILS/1nVM9
K1QptuHNKsnkHh3po3/z2JXN9yAP+c4SEDxWRraauaTTZMCH/qpKD+44y5nFug7t1PKl+Oh3P++z
XbYFxM/eIetc2s/SfjuTrf7fex/WiHZ2BaC23giwvvISDq0P+Qzz57vf/+OdPlobvxUziNajvK6Q
r53TM9MwHHX6vwdsiMYTOQOcPLaTkTVbKQjUwLWysg3kHd/zwBDUiq8TQdzYiipTvxJUwWwJwBWM
DxB0wRWUwBhswP6jQRmEuBvsNu7TQRkUvh58CG9rPyCMuBkkQtB7wSMkQsdSQtJjvyZsQiOkQQzs
tyGE/sK7Q8HduEEqTIsr9MLv00IfzJdv+8Lok8IH5ELYIMMy9D7nC0MNlLL1Y8M5dCjw8740XIss
pEM6ZEIzFMI9BEQRa8G7E0IrDEQIPEOHw0OmMsRD3MA+LEI3bCdHpESr0MMgbEROyxdJrMROdMIO
dLY4zERPLMEf3LRFRCxSVEXzarZT/MNVhMWWmjUfK8RYtEVWvApOBLETTMJb9EVZHMTyQkU7/MVi
FERQRK5hJEZjZEbpS7zlSrQ1bMY5hL/YUsamQKhp1EZcREaoqsVtBEdgfEYek8MUDMdz5MY3bKhr
xMRRREdqzEF2KjRpfEdPhMRkmkd3rMdDNEUkysd9/gTIeEwrfYQTdiSugERIEuxG+eHF+LjEhITI
h3jICAShf4zIi5zFCCTID+RBjPTIG8lIlTHIY/zIklTHk2yZfNxIk1zFAktJXbwdmGTJmSRJlKyW
kdRImtRJgRxIbVHJnQRKhVzIOPnGoDTKYAxCU8FJZzzKphzKnCxIUVxJp5zGe7xAb5NJqtTKmgTJ
/VjK1trKsKzCVnQPqRTLs+TJrvSNr6xDtHRLm0xKE/zJt6TLcVxGG3zCutRLpORKtGDLgsjKvRTM
EQzJsezIwURMDrTEhSpHc0zMx3xKpjS6MYTMyuRLilwLs7TMzbxLxezLs8hGzhTNyCTM5JrIHBvN
/tS8TGf8S2ZTzdfsTI3UTNikzXRUy9ypzdyES8kMsKnUzaOkFsZszN8kztvkzbQszuT8TFnjP+V0
zp5cTtl8zunsxtP8ROrEzrgsTUzMzu7cDRR8k9b0TthkCxuhx/FMTbVgi9BEz/ZkRPF0z+L0zfik
z/q0z/vEz/zUz/3kz/70z/8E0AAV0AEl0AI10ANF0ARV0AVl0AZ10AeF0AiV0Aml0Aq10AvF0AzV
0A3l0A710A8F0RAV0REl0RI10RNF0RRV0RVl0RZ10ReF0RiV0Rml0Rq10RvF0RzV0R3l0R710R8F
0iAV0iEl0iI10iNF0iRV0iVl0iZ10ieF0iiVdtIppdIqtdIrxdIs1dIt5dIu9dIvBdMwFdMxJdMy
NdMzRdM0VdM1ZdM2ddM3hdM4ldM5pdM6tdM7xdM81dM95dM+9dM/BdRAFdRBJdRCNdRDRdREVdRF
ZdRGddRHhdRIldRJpdRKtdRLxdRM1dRN5dRO9VS0CAgAIfkEAAoAAAAsAAAAAIAC4AGHxnAZ2pkW
1rIcxL4po8JLlJlqf3+Dfn6Lf36Afn9+eY94arVwWLx1OruGHa6YEqmiDZurAneyAWC6AGHJAIPY
AKbXAL3aAs7jBuDsGOXgM+rlQurySerrWe7eauDeec/ufsT8f9P9f+f+gfX8h/z2k/7pnf7fqP7T
sP7Kp/65oP6rtOah5rCI8p179rZy99J3/OV0+vN16fVv2Pxy3v6G4v6W2/6h0/6r5f7Y/v7+/v7+
/v7+/v7+/v7+/v7+/v7+/v7+/v7+/v7+/v7+/v7+/v7+/v7+/v7+/v7+/v7+//7+/v7+/v7+/v7+
/v7+/v7+/v7+/v7+/////v7+/v7+/v7+/v7+/v7+/v7+/v7+/v7+/////v7+/v7+/v7+/v7+/v7+
/v7+/v7+/v7+/////v7+/v7+/v7+/v7+/v7+/v7+/v7+/v7+/////v7+/v7+/v7+/v7+/v7+/v7+
/v7+/v7+/////v7+/v7+/v7+/v7+/v7+/v7+/v7+/v7+/////v7+/v7+/v7+/v7+/v7+/v7+/v7+
/v7+/////v7+/v7+/v7+/v7+/v7+/v7+/v7+/v7+/////v7+/v7+/v7+/v7+/v7+/v7+/v7+/v7+
/////v7+/v7+/v7+/v7+/v7+/v7+/v7+/v7+/////v7+/v7+/v7+/v7+/v7+/v7+/v7+/v7+////
/v7+/v7+/v7+/v7+/v7+/v7+/v7+/v7+/v7+/////v7+/v7+/v7+/v7+/v7+/v7+/v7+/v7+////
/v7+/v7+/v7+/v7+/v7+/v7+/v7+/v7+/////v7+/v7+/v7+/v7+/v7+/v7+/v7+/v7+/v7+////
/v7+/v7+/v7+/v7+/v7+/v7+/v7+/v7+/v7+/////v7+/v7+/v7+/v7+/v7+/v7+/v7+/v7+////
/v7+/v7+/v7+/v7+/v7+/v7+/v7+/v7+/v7+/v7+/////v7+/v7+/v7+/v7+/v7+/v7+/v7+/v7+
/v7+/v7+/////v7+/v7+/v7+////CP4AyQgcSLCgwYMIEypcyLChw4cQI0qcSLGixYsYM2rcyLGj
x48gQ4ocSbKkyZMoU6pcybKly5cwY8qcSbOmzZs4c+rcybOnz59AgwodSrSo0aNIkypdyrSp06dQ
o0qdSrWq1atYs2rdyrWr169gw4odS7as2bNo06pdy7at27dw48qdS7eu3bt48+rdy7ev37+AAwse
TLiw4cOIEytezLix48eQI0ueTLmy5cuYM2vezLmz58+gQ4seTbq06dOoU6tezbq169ewY8ueTbu2
7du4c+vezbu379/AgwsfTry48ePIkytfzry58+fQo0ufTr269evYs2vfzr279+/gw/6LH0++vPnz
6NOrX8++vfv38OPLn0+/vv37+PPr38+/v///AAYo4IAEFmjggQgmqOCCDDbo4IMQRijhhBRWaOGF
GGao4YYcdujhhyCGKOKIJJZo4okopqjiiiy26OKLMMYo44w01mjjjTjmqOOOPPbo449ABinkkEQW
aeSRSCap5JJMNunkk1BGKeWUVFZp5ZVYZqnlllx26eWXYIYp5osJjKlhAmiWaeaEaapZJpprPghn
QWqSMWecCN5JJ0F64gkgmgjUeZCgAvXpp36GIkToQIseWl8CCEDUaKGTOspemxJVSqml7yX6kKaM
gsppd5heJCqjo5LnKUWnoprqd/6rTpRmpJ+2+upypWqkp62b3jpdrLIaCuygvPr627CSAovsnsYi
l2tGy/Zaa7PEBdpRmqxmSiu1vGG7UaDFEhtRtNyq5u1G5DaUbrjljpYuQ+d6VOy77XYWL0bglrQu
u/Vadq+p1qa07bT9ivavqfzqGm7CBStGr0IHr7Rvw5g9i1HEL01MsWQPQ8ywSfN+vDFeHStackoL
j5yYxQiLLHHIKhN2skEY/6RxzHzly9HMNS3sMs5fAXotzze9+zPQWhEd6tE63Yz0WpAybefAVjn9
NFk1Z5r1VD5fLdbW40pdFL1iew2U0qGaZbTZWYFdK9pOWc123HDDzXWmc9Mttf7bZcmd91B12500
zH8HBe7eZXvVdeE82c13XGszjpPjifdNuOQxPQ6v5ne9GzDmLyPuGLuVgz7o59+W/pbRqpseuOB2
sW66vIFvFvnsLQ/d+l6L4x622LAP5rfvJuu+u2DDE88ywq2lTDyfwAf/WPKFc76Q9QZfLvnrujn/
N/YJSW9771eDH/7x42uNtPnEip893ipTHtMBIoRwGfntsk9ztA9k8MADF5nABBISggIa0IAIoYAF
DCM7bulvfxG5wP8mSBEJSECAEojIAe1HhghEoAIRoAADvfcqnaHLehlIYQoBOBEBYjCDFAnBBytQ
AQpEADELo9qh5GcRFWZAgv4UcSEGLVIBC1iAhiLEIf7MZEKN5AsAAhBAACZCAh+y8CEgyCIIJkAB
F8KQIhW4wAVoeEOHkTBMD6RTnQLAxjZGhAQkIEP/+ofFLBLEixckCP1EwMf6bRCBArHAGCnwRYep
70tpXBqhosjIKT4EjgNxgAMy4IArHkSLCBFiIR1iQBHQEIllXEwDtcTDgzAyio5sCCQHQklJVhIh
BwBBQrjYRQFaRJBHBOH0zjilRFJKUzaoQSMB8MiC+JCSEdEiBWq5yQhiYIy6hMwSnVRKhNzgBgOJ
IjEdssqBaEADKXQABOooSzIsc4gWucARQynNaR5peRYBGwosUkWClCAD4P5EZkPsaJBmQqScmbkd
kijXKhOcwCL/8x8ASxBJSyaEnx6BaEAPSSRfkqGJDWFoOsVIwX9KNKL2CpaQqllMMrjSAQIBABsb
4kMgPuQAHBwJQDVDNh9ZFHxxPKkkAcDTni6kpeO0yUxtJ9IbwbMi+osjPlXogDb6VCEYiAAG/GeR
C04gjxwZavooGiOCboSh3wSnJNsYAJ4yZI4ZsAgeNyJLrXKmpmQiqUbAKlYHSJGNZl2IOi1AxxYK
cYAZmWESDVZUFdkNoxw5KBm+ORC8bnMhGJjqM9Mqkb9KQIuYlcgyl+lB0sDVRBa10+5OgE0TUCSy
kV2gaSvrxYx8koymGf5liOqGWJAYNAVkOME8JZKByFKVDKuFiGUxYsQj2pAhByAqV890U/QNhKHX
zEAHJnKAqVJWICYILkP+OgG3RkSBxmXnQTS61XExN3rOHUgcTboABzSAAdeVCHmBq92FaDKzFfmk
B8VrT9DIVkKCc59CNJrCCEiSARapb3Yd4kKC4DciRdTvQRZM2OUyKLShnQhdwRnFi9QXuPM1CS5r
yN8TKNZdpHNQgOuk0oWg4AQmKEEJJqnPjOg2rAEQwAACUAOHnJIgH5Zxck9SxHUe5MSlIV16wdNc
PfU0r2SoQQ1scAMU7FYgOnVAiCtiZQ0wcgBRpAFDBkBmMA9gIBSGyf5xC2JlPSY5xQTCcKNU6lgY
xCAGCglrOMlQAoNiBJsCiMGP8ayQU3YYyDdpsz23HJr/7kfOlSJrWRsSVg1IksIowK1FbnBnQR+a
0AjpNCMNkuaSlGDICEnBlQUiY3MVFj8ZHlaO7/pYheDzm5LErm7JcAMbWOQAd9axAGAgEFAbRNRk
FnNBSg0SGTN6INck9YdjC2f7rNhWOS5rrW0tVoO02dcW0fFAiE2GO4fa0wIgAw16vGxGM+DdCJ5I
dqddEGwaBMmscXR7mswuKGfkmqgWyKxTmZAc73jcAzF3QcoM5oFImd3PDTi84e2QeTObAGeut70J
8mKK1CDgE7Vwev7kGpNes/uUOS50FMEsAHbDgNzlJgjLV55ugkw5IRN/d0IsTm8yDIAAGBeIDah8
kFU/ZN0Qt1e1z3NUVint0NKWMRwlScln25wMhia4QQI9aIQXe8gDCLa4D3LNjQ9EBSroALxNzHaL
NwToQCczuL1tdIcYu9HuJNWKOcLGu9Zc1R0nSJb77GeE1EDsUlSIqD/t9YLcWQZkTrpBrqlqgaBd
Be9ugEUYTuaDpEDTEVF4bGUlnmt7BOUBoMHcDXJMLQ8k02bPptgDAPODBHsAACA3qF9eezLIYOwP
d7GV0Z75ipRgBsj/ecYFUnaJ2Pnu1Ba5dWJdOUOnkNv5RGl2d/5NhqGbsuZk6H1BoK77gojfIDdX
SAM6wP4ONKABbAcByIE871YPIPm4Z37sH3L+1Cg5O6b3EA2gAQNIas4mdSRQAmi3AAvwABLkUAXx
Ta3EZmU3fwPwe43HEC9XbqInegnhfQjBAGjnfgxgYjx3gsw2EBj3cwQAghHBewlRAyEwf/61dNHB
bxLxfjp4gionRg/4AFa3ZwnRazJHZlFEaBvoEDBnbNBHdtFmECqQAmqneRVBAMgHd8vnEC+QhAix
bquhb8pBcg4xgASogxARAMcEQDQIEVKGdV92ZrvHfwmHap3WEE9IEJgXbxZxhUCngSKQXC/wAgsR
A8rWPKTHHP5NdhHr1wFliFIQ0VJAuHkdRgMyEAO/N3ZxqIT9p26Sl2pWpmgagXwzEHQIAYOBKIiD
KBtgeCxythHt934ToUIPME7OJhE6ZmZYh3hzKBBcqIGb2Ikuxnb4NhFApwAJAXOoqHgeSF0hJX27
EYAcwYhUGIsPgAHLloIJwXDidnsceBCb6I3iV2arVxAiuAAIYYImIH8bYYqBqBAwaBHB5xmf1S17
BxIJ1VcP8T989QALdI0NMXM6RnCZ6HihRxArqGN3OBDvtgAMYI4fMWw1x3unmIzg+I0NcWeFiHfO
GBvUpzqV9D8oBUciOZIkCUeoxVGtdo09V2yC1nmOh4Tit/6Mg4hnnEcAzKeOAsGADKhzHdFIgfaO
C2GRDFGHqGGDqohex+NDr/QQqPVMDxBHNIiNA1GJAQmMA0kQTSgQAoCBWHl/M0BmNmkQC7CAO6kQ
DkCAGuAQwoRy3wgDf3iKFUGUX5h3/ieGIiGBCgURTSlBCWh1UrlyUNSGx5aBCXcQZgZ1Uwl5cncQ
ZLkALzaMJqVT1hRMbQiRo1aRcEkRQPka/9c86MUSeIlSBbSGBoFalkR4E8ZonJduVjlkMSB+XkgQ
K2eEC/eVGZeQZECWeghj2hVWDSBJuvWJKRBtwTSDuehpWseOFbGZC0GaSneIRWmXJ5EBRwQCMZUR
2LhlW/5Jc93XEOIneVQpbIY3d/vnkAZxgJX2mwLxiSjQfObnaQn3mmSQmRJBnwvxcNf5Zm9zGpAW
E5j0EfN2ngH3eOLZffs3mAWRfhx4iVqncQJReRChARyAa9vnY7Nmbi9HkRBxis6ZcDSQkV94PXOy
ZHnRdEhFopfkXR4hlQn3ewMAcQd6bHe3cZUIeS0HjARxA+rYcQ3JgAuBa47oYz7Zi/XJizOZlXO5
P4SConUBOxnmEFYlQB/VQhDBogLRcFGmf3ZXbzE4EGXWh6T2Xjtpnhqxlo1EERPJnFgpk6qYNoMi
j9DYEmuFEVblTwlhdQnKbjFqe/Xmo5N3pXH3cwexAP7spwF+ihCSZGkK0WuUyYFnWqRqOm5EahFC
BqeawqSrUzZPWlnnhE4Ohlkdqkl2ihApGYIDAW6gxxCCuZA8maPYxHlZeHYLSIAJkWVsNpzYJIOu
+ZqIaRCzBn6nOKmSKpQLgY4xhqeVMaKVgqlQ41U0QUvMJBCYpaIHMVwQUaoEkXMGSgZ1pxDsppMM
yQBj93r455IFcXkMqADsxwEGUWmWxnZthqv7BwO9On7ZlmO8J6zzqa8O8YmQ+ZzMQjP+4qwyIQIE
sVlX1V1TymCaJF/zl3MIhk3d6q020JgMgIuvpwIyYJvjKKuHSgYcELKtlp4asH3BeRFZx6bz2Y4d
6v6JoJg9y7oozGo5HyFgEWGwd9RFFzSqDPtCGSGCeciTVTYR6MqQZSaWgsprezpgJVBpQaoRlpl4
B9GO4YezD+Ge+qkugjKzYdGfNsFHBdGpVxVADZsRI1h8vKYCRLuA4nqLB7Fe0DaxDIFrHmFnjLRt
mcmvTri0Src4XNsV1KcTVjsQCDu2alW2GHF5FGd5FHEDDDkDLtqgZDACRRd4LmEDB1ADDCqpqBip
V8qCQoebGeVsJNCyMvMxb8IYcXoTYGsQ58SzPeupF8EA7Le4uYmyKhB5HTu5O4esIVF22DRw6aZ7
eksGWPhzu1t0bVdqH7RmZqQwK0OwOzG4IdFaGv7RASoQrnqYqhHhkPPVsdRbECQwAiPQuiTRnrym
lWxZbA7xpaToZuvJngqxWTbEX8hDNDbbtYELFDgbvh9BrRGhuK3KrRJxlpbGACGWkPmZEH50QB+h
WFcWtYGmsgZhhV8ZdwXxeZT3EK8FQiEwrQDMEDRkOUeTv2BxbX97s2TgvxEVwg2xYMSnh+sZEVk2
jQMBoWSwwCxxlpK0ahN8mRABuRdMEJ9HEUYESin6nw7hQSSmvz9jorwjvUPhRyXhwgxBYScwwALx
rwkRVq5kwxwnEDqsEraKlZe4bW93wchbxBUxYoS0EEq8EJ9Uv4pTwilMFfuLFPVjEqa7EGkGmf5c
3MVe7AAyvGwz4a6OiLlRVq8OgXFYaKUN8VrOixFFlkv2WxVKY8JBo6maLBIzVEQ7UWomdmQSoQGM
aGlPe55w6xJNO8jpS4R7eIUM6Vq55MEfbMUKIUaW3Db428lckcdK8Vqd1RCxpBKlJpWBnBCnDH8L
Ub4kYZx36rQOgE3cSxGimK4G0ccEEUa7PBAPFhEWgAFGdhWZfMdS0ZFPUVw0BAGXbBBxHBIy9mEr
KRG7pVjzzMIcMcbPtVgE6IhyKxEEoAJhuWi+exBH3M7vLMJkFE3nXM4jVLO+fBIX8ExHFFTklBCf
TBHYKhAryBG4hQJkyGcLoc8bgc9otsXc+v7PElFftUgSCZ0QuDTOUFHO5jzT9UgVqcXQyfRR9etB
g/VShql8sdq42HQDOoWsJL0RlKsQWZy9uSYR/1pqG+3SVjzR6qTTTOHQp8vJNS0S3LxfFpFFBiTJ
7QwRK4jBF1HU2ASkTw0Tq2wQrMoAbf0QkJlmkAwTgnTVeqMwXU03EN3XI6HOWH1LtVzWFXd/X0oR
UTRlBwBuiJzKLdFnIQiu7wbZDAHIaDbPxFwSILQBWW3HhQHMWqHLsIVcC0sQbmzYC4F2NmDByicR
fSe1BOG0MWGchVcQY5m9O2nZxUqOHWDPGoHLFxECno0UiRTRWIHOX2HVg60Q37zNB63a1v6ktgOR
fASgAAMtpI86EKesqDBxnXWX27s9EUj2Xu/FAJqNRSZRQEdB06cLEsh9E6U9ESBcQEWGRBBRdioQ
Yu471OeGbqgUxpa7ETB1QCZNEPlZzehayA9xZQxw3g+eVSVhsEndNKAtPKsbGNw83wjBnvZGg/j3
vorHi1wX4Lw2nCrNESJAvm9dEOGbkCWAzRRB3WRAu2qnxRdhVSVR4TZx3IC9FKjD1z8OFYLUxGgG
ry/7gTYgxD9njMeYhMT2wwIAAFRGZXzbbLdtEOELbhhrETR+eSS4ERZ0VbALpQ1mEDw+E0F+ovGd
3HY85FQhARbgbAEaESCI2CJOEO8YiP61x0gfh6MpkeQCsdQFYQNlFkUMqM0FwX25mXYRrhGiihFk
bkFa3hNp1OZbkbrMgxpY650DQbWyea8fcZYUMZwFMQItfouHzpBXfmQbt34PDouSbq0VwV2FdOCZ
88SY/svSkixwvhbA+xAiwI4aqr4o1xGSOREwzt/lGgAMuQCtvujpu4juJ+uzbr21LrYubuHQOzp8
sp+lIZwSMWT2uaYSLLlQDWODJ2PsV2o9SqaneqVuSxBUSWY6yQDJqxDzZG+vCMYCcQAFXRCRXhFb
1Km3XjSX/ut4HLDnE+6feBGgbhAZ+nK6mBCMrLRV1mYm9tgIHgIe4AEoALEHUQOHPv6uZAC5ZBYA
uo1ggtmvQkcG/U6qAT8QXmS4HsVPXOSzCP/mkyGzJqPwYzFvbIcRGVqKG5iMJY7GjYVK4BcCRHdN
8svPQIoQISAC4DrLQX3oCs62dQLodCcQPWaGdzrzZEDrzj2tOVtLNj8TaLPrfSMuv/QZAB/P66iv
ElnuDJF1/z50outNU58QFmuY20mb+9eQDAByIKrvDvcQ6S0QiKsQxZwQhVvmKOHe93M+QP8Xr6m3
5FbsD2FoN+r1s+3dgM+2Tm4Q9T4ATs7lWYibSJrB9ib6hvwQlL9PCFv7JOHjyqVGm6oZcmn0MID3
/Hdn9HrxtcpYq72T3AdyLgp+3f6n6q1PkHbocDUQAF2OEHfNVuV05hnDNG4PNdCztbjx+wlRAMKv
iVEudkpfqycVEZlGBiDQ90VohMvXsa+fo1566FnIaNkf1qfNEgCRQCAZggUNHkSIUGCChA0dPoQY
UeJEihUtXnTIkMzAhBwxfgQZUuRIkiFr1KBBg+ILkS9YxoBJUIAAAA9R3ERxwoQJBz17kiBRokTD
BQhv3CB4w0bDAU2dCjB48mCMiUvJzBTg9KBQhDtNlDQIQiwIsCQ9mtVYVu1atm0fLoyY1u1cunXd
HghRgyIMlyw/9oUR2KCAAIQDFMxr4yhSnCdOZNAQWUPPgkJLfCXDQLNmowWtHv4cIEOGVoR6DcI4
eKDhUgEyZjZFyDXhTpIhxBJ0kCGDXYhwS/rmHVz48INy3xonnlz58oaBUYMELBgh1pmHVZNRfDTF
QQeSMzhoaOLE5s0IbdTISrrgDBkzBkBNqPK0dDJUE6KHmRV+7KEJZRN8QLcLJsKrIAce6OmB5c4a
iUHmHoRQJAcbQi5CCy9U6znoWNIwIQECwyqAk6R6SDLKGmJgARUWKC8hp9QjqKn9ErLvIA1rPKgG
0fRz6D/+SrDgASEfsMCi3L47UTjgGpwQQyef7EiiJqGkskqDYIqhQ4v4euEAEbScD4b8ZqqJosnA
e0iFFVsE7TUZacBRojgJuv5xzhffg0gozFIrQTcMLrhAwYp0IzTJuqbECFErF7WwwigZhfRJLENy
LqK+CIpBgEwJY0tNFTgr6IDFQnOtqcPqs2hOMjqM87308ITIhP4QwqDWDC7IAChdSShohF11hUwD
3dA81NGPFI00WeWQ3chYZZ91KyVVK6LvIZfoFJO3NR26YYZMYSto0olUpS8mmXYEVyIfCaoVg1sF
NQioERyC7Dt421pSwgQQgLbfC501CGB/B74ILxIpBROhSysF6wDxHDsBpBmyamjahBi+btXnCoMq
tG9nVNdHW+8dlFh8Ba6IWYJXnotZlFmG2S1zG+qLw2oPImCAkiC+yaKDEf5K+KHnRKgRBsKyEtFV
nT8SigQLng6SZImEzEDItfINCQGVY+ZaLZRf7jrsj8R1yC+NIRqAgJzXwqmik+SzMejmwi0IK1dN
I8nWP4usKMCqrQZraynBFrtwfQc3PPGQ4IToUi/lLkhttdMNiQEVOjDophSQGtegjG8Wmu6ZNp2J
jBo++0i1dve2iFABpb4Ia5BkV7z2wCci3PbE4W4OcoecknwkzRpogIGEjhq3xpl9nw9TLDc9lYzF
HgqwxwzaDZRjhHz9lQTXqz488Nx1J58il8cvf+URHWIYoxnenzwir+Z/+ATiiwf1eOQjwrFoasMd
0/FSgAKEHOhvDrGVBf4CsMAF/opehILd4NCXkQmmz4JvkdIFdZexuX3EBh983wzUpgCD0M8rCDkA
xMbTARYODyIf5J/yCgI69j0nU9EL1WdyghmfCMlkDaGOYSaimwj2poIdEZwGlXgcxC0xfTBhXkP2
R5CcEUABA2CAZTDSATV1oHg9gwjeYnQxG5oLNRxbmkNIRznPTHEn3wPfQ4JIE7fQ7lhHdGIeC/Iy
POoRUhaLyBSp2BQWMSCNH+kiAxpAEJxspyEjSs/agHalGD0FZAh5EcUaMsCCBGtYEHDIeTRFupOV
xY5+RGUTjZjKrpHNIoKM3AwSkDZJgqR4+DOeQWAJmrS9J42fo2QQD/6JyR1hhQZiPMgO+ySsOBbE
Kyfg3FWMRkdTas2UfWQlKvmYTZbxziJgPAgMQ6i2h5hQhRBrAAs7oMhFGmWXd4KV87AVLhmM6ZJT
iUGp4IPMhhBqV+s6CA7Rck1sclObuDMotPLCz4mAsyBHQZ17CDCbE0okkcTzXDhRNwD2PAUhRXtO
a6AHESxpkiAfjOaTkrjKhLY0URPhl0sZxUGLnICAnZFfRSuighR8KpcGWdd5TMMe9wyTbjPElGvu
iZBSoTA7TrLmb1YqU5mej6piE487cyoSBqyzIQA1nV6KalQAio5HIlGMQ3Gjm4osFaZTpVBBr8rN
bc4VZnsqyObyBP5WtlzGRU8ha1nJANgB0BQjN0iBYwqCIJ9IBAAAYGDs5HpKu1YWiaq0rLIAetOH
GLYueK2bm9xqVqwQAHUhuclOjoSkHyaEgQGALO7getnM1tZ8CLUtpNalVgzRxiDFjOdD4GRPFOzy
IzqBY2sDWp0FlomJ4sttdOMiW+lW6QC8yhxnqeRbgtSzVAJ1SD1HqhtHkqQEzPzOQ0QZIthScLKz
re5VVSbX+LolYgiJQAUqoJwDABSvrxktU5VKhtz0RLsiqdetgKInx9wkmiFybnHoC9/62pWP9K0w
WO57kAhEgAIdXo5/R2IVnzS2LMp1SHUUQuGAsTjDc53viy3E3f6D6JcCN47AR24jknWB9rBk+J4D
ZhUhF+8RwzKmal2RHOKG6NfJHwbJWMgigQlUeQIVoTEZfHyRG0SmUNh9EGVTVuQlW/jCZR4OXwny
NBtLYCQgsLIE5HwRGg/5sJ50AATAvKwJHxnNMMbtn+vSX4g8GcQjsXKc6bwnoejGs0McFhn2rCQy
i1nQZbbqpZlz4wrcGMoiSXSV3YwRzAgpUEWMSE5uUoJJ24XMzdJ0rB0S0+nKmjhO7vSnQxLqOX/k
K4A6NapjpWUPUPq9fra1ZTOdbLtQoAIW6HSOMSJlscR5Ar0m9feEfRCskCFAHdDAltny6lczO7pg
Q7a5D8JpCv6Uhdch0TZFOFYYzSBo2/o6trr1LWHq7pstINgAWdyd6FF/xF2EknZEglgYIjqg1VK9
pr8lHrBAT7wkZAHBoz/ybnjfajcTmWMAIPjwkFhatrS2+MSXnfKQCHwtVh4J1A4okVFiBQBflmqf
Wb5zgiiZ5xfZMZVcF6i9QI+ZDwCKWQj685/7nOkUcXldMm4RW72rraXztoLsnKj3Pv3pZ/b6RKI+
l6BTxF3uInpIdDK7Sqc77PVF99slMva1lL0iJai6SA485ojL3esx9rtDpt4Wuz+kAZIhg2xIPhHE
cj3fgX+7098egacN/CBjqcj9TEyQxbs2eqeVYN8h7/eVe/69w9EmiZxFTRDMWyQyxEtS0h372Mea
ziLkLvfoYy35nxs64SAhuAToXpDBJ0Qyr0eT7GdP+wgbUee6hz6sM+j1Z0Nbv7/HSKiv3ZDWO+T4
J+r8QSDLwNrHpc9uj76mwd57QFk/AiGAP0hurGiEFN74yJd0+BHy2vLH9fnpB8Ce4z2LuwAMgDYP
Qwz4U8AFDAERcEARoClPuzYqIz77c4gHaIDdUD55Iz//W7oABME9qridcz8EFAkKiDPhs0DqCZAD
0b+GaK6EiCroCsEaFMHp2zlcQz1Q47jWIaIh8ZoPtMEhlD6WSrnqs7F2AzUUXD2M0LZ7GxyUK7nc
I8KUi/47lmu/TiODBQQ+Jiy41kEvKDyOrqvCMmyxEZQ4aFNCg2DAEKiIJvyIBBND2kIL9DNDK+y3
wGtD+NM4ktANUHI8U7rDQaTD3iDEBTm/Q1REisOsRayjfRE9R3TEAZREJknESsTE9cPE8KHBTdzE
K/RErhPCUPxESiTFQmSSU1TFjcjDVZSwx3PFUwS8WCxCS6RFWtTEUDS5RrxFV5RCDPLEXUTDXozF
WZxEDBNGYszEVhzEZHQ+ZYRGg5hBQyREZPzFaIzGXKxBZ6Sga8RGbDTGAORGCvrGcsyIYRw93LND
c6xGZiS9tltHdlTEcPy7aVQ6ecTHiPDGFQu7ctuXeP7Mx2O8LaZDRoAMyGXEQSuEx4NkSHTkR4kb
x7hqyIl0RwrZN3WkyIx0yIOwx0sTiH2ULIPUyFWkxyWLSFQcyZSstZVEspNESZWESWA0v5a8GpGM
yV4ExepySY6kwpvMx5y0LYz0yaG8PW2UL0jsRKJUypQZyKO8xKWESqbcSG0qyKi0SsmaSifyR5u8
yp/Mygvayq4Uy5fiRQ3ayRbjyrE8yJIkn4+8JpBUy7iECLi8wfQJS7nEy2OpyMIRyrz0y9hpSr70
x78kTL38SmjZyrQszJScL8X0mo4sOchczMk8TFYcmLM8Q8rUTMMsy0VJzM0EzTsKTM98ytA0TcCs
TP4+Q8bTZM3ZMR/HJMdRbM3ZfM3ULJYJk0za1E2WlElErMrdBE5RnMll8ZqeDM7NBMrbDMLjZE7O
5M2TKUjYbM64bMxHLE7pnM68TE58U4vczM7vHM3enMLrBM/y5MS5PCKkTErzZE/npMYx+832lE/X
PEzMNDLsnE/NrE7xHAmtwc/8DM3tdMv1BNACLbmmtE8BNNAFhbjQk00GhVD6fM7xjNAKvcf3nML/
tNDdVJT0VM8NBdELfRSyDNES/Y1zLEoNNVHmbBJ0M84VBdEKoctahNEaPdHiMEIb1dHfQDlHSdAd
BVLLFFIjC9IiXc608E8jVVKC+tEldVIVddIolf7SKaXSKrXSK8XSLNXSLeXSLvXSLwXTMBXTMSXT
MjXTM0XTNFXTNWXTNnXTN4XTOJXTOaXTOrXTO8XTPNXTPeXTPvXTPwXUQBXUQSXUQjXUQ0XURFXU
RWXURnXUR4XUSJXUSaXUSrXUS8XUTNXUTeXUTvXUTwXVUBXVUSXVUjXVU0XVVFXVVWXVVnXVV4XV
WJXVWaXVWrXVW8XVXNXVXeXVXvXVXwXWYBXWYSXWYjXWY0XWZFXWZWXWZnXWZ4XWaJXWaaXWarXW
a8XWbNXWbeXWbvXWbwXXcBXXcSXXcjXXc0XXdFXXdWXXdnXXd4XXeJXXeaXXerXXe8XXfNXXfQfl
1379zoAAACH5BAAKAAAALAAAAACAAuABh8ZwGdqZFtayHMS+KaPCS5SZan9/g35+i39+gH5/fnmP
eGq1cFi8dTq7hh2umBKpog2bqwJ3sgFgugBhyQCD2ACm1wC92gLO4wbg7Bjl4DPq5ULq8knq61nu
3mrg3nnP7n7E/H/T/X/n/oH1/If89pP+6Z3+36j+07D+yqf+uaD+q7TmoeawiPKde/a2cvfSd/zl
dPrzden1b9j8ct7+huL+ltv+odP+q+X+2P7+/v7+/v7+/v7+/v7+/v7+/v7+/v7+/v7+/v7+/v7+
/v7+/v7+/v7+/v7+/v7+/v7+/v/+/v7+/v7+/v7+/v7+/v7+/v7+/v7+/v////7+/v7+/v7+/v7+
/v7+/v7+/v7+/v7+/v////7+/v7+/v7+/v7+/v7+/v7+/v7+/v7+/v////7+/v7+/v7+/v7+/v7+
/v7+/v7+/v7+/v////7+/v7+/v7+/v7+/v7+/v7+/v7+/v7+/v////7+/v7+/v7+/v7+/v7+/v7+
/v7+/v7+/v////7+/v7+/v7+/v7+/v7+/v7+/v7+/v7+/v////7+/v7+/v7+/v7+/v7+/v7+/v7+
/v7+/v////7+/v7+/v7+/v7+/v7+/v7+/v7+/v7+/v////7+/v7+/v7+/v7+/v7+/v7+/v7+/v7+
/v////7+/v7+/v7+/v7+/v7+/v7+/v7+/v7+/v////7+/v7+/v7+/v7+/v7+/v7+/v7+/v7+/v7+
/v////7+/v7+/v7+/v7+/v7+/v7+/v7+/v7+/v////7+/v7+/v7+/v7+/v7+/v7+/v7+/v7+/v//
//7+/v7+/v7+/v7+/v7+/v7+/v7+/v7+/v7+/v////7+/v7+/v7+/v7+/v7+/v7+/v7+/v7+/v7+
/v////7+/v7+/v7+/v7+/v7+/v7+/v7+/v7+/v////7+/v7+/v7+/v7+/v7+/v7+/v7+/v7+/v7+
/v7+/v////7+/v7+/v7+/v7+/v7+/v7+/v7+/v7+/v7+/v7+/v////7+/v7+/v7+/v///wj+AMkI
HEiwoMGDCBMqXMiwocOHECNKnEixosWLGDNq3Mixo8ePIEOKHEmypMmTKFOqXMmypcuXMGPKnEmz
ps2bOHPq3Mmzp8+fQIMKHUq0qNGjSJMqXcq0qdOnUKNKnUq1qtWrWLNq3cq1q9evYMOKHUu2rNmz
aNOqXcu2rdu3cOPKnUu3rt27ePPq3cu3r9+/gAMLHky4sOHDiBMrXsy4sePHkCNLnky5suXLmDNr
3sy5s+fPoEOLHk26tOnTqFOrXs26tevXsGPLnk27tu3buHPr3s27t+/fwIMLH068uPHjyJMrX868
ufPn0KNLn069uvXr2LNr3869u/fv4MP+ix9Pvrz58+jTq1/Pvr379/Djy59Pv779+/jz69/Pv7//
/wAGKOCABBZo4IEIJqjgggw26OCDEEYo4YQUVmjhhRhmqOGGHHbo4YcghijiiCSWaOKJKKao4oos
tujiizDGKOOMNNZo44045qjjjjz26OOPQAYp5JBEFmnkkUgmqeSSTDbp5JNQRinllFRWaeWVWGap
5ZZcdunll2CGKeaLCYypYQJolmnmhGmqWSaaaz4IZ0FqkjFnnAjeSSdBeuIJIJoI1HmQoAL16ad+
hiJE6ECLHlpfAghA1GihkzrKXpsSVUqppe8l+pCmjILKaXeYXiQqo6OS5ylFp6Ka6nf+q06UZqSf
tvrqcqVqpKetm946XayyGgrsoLz6+tuwkgKL7J7GIpdrRsv2WmuzxAXaUZqsZkortbxhu1GgxRIb
UbTcqubtRuQ2lG645Y6WLkPnelTsu+12Fi9G4Ja0Lrv1WnavqdamtO20/Yr2r6n86hpuwgUrRq9C
B6+0b8OYPYtRxC9NTLFkD0PMsEnzfrwxXh0rWnJKC4+cmMUIiyxxyCoTdrJBGP+kccx85cvRzDUt
7DLOXwF6Lc83vfsz0FoRHerROt2M9FqQMm3nwFY5/TRZNWea9VQ+Xy3W1uNKXRS9YnsNlNKhmmW0
2VmBXSvaTlnNdtxww811pnPTLbX+22XJnfdQddudNMx/BwXu3mV71XXhPNnNd1xrM46T44n3Tbjk
MT0Or+Z3vRsw5i8j7hi7lYM+6Offlv6W0aqbHrjgdrFuuryBbxb57C0P3fpei+MettiwD+a37ybr
vrtgwxPPMsKtpUw8n8AH/1jyhXO+kPUGXy7567o5/zf2CUlve+9Xgx/+8eNrjbT5xIqfPd4qU+7Q
AxlkANIBIoRwGfntsk9ztA8IYAAtMoECIiQECExgAiEjO275738SqV8GLvCAikhAAhPAIEQUqD+B
RKACFYiAYW73Kp2hy3oSrN8AJ1LAAkqgIggEYQUoEAERjlBbqZIfAAIQgImQIIX+FWRhCw1okQpY
wAIgtOEI+WcmE2pEZwCIYhQjQoIfqhACEAGBFkFAhiG+0CIWuAASQ+gw74npgXQiFA95OEWHVJEg
DqhfQ7ZIEC9qUCD4E4Ee88fBBQ7kAheY4Rcdpr4voXFpiwqAAATARgC4kQRwdIAkHZAQOh5kiBmM
SAL1CEIKkJExDdSS/BISg0Wy8ZEFSSElD3IALiZkAhRo4SAlYkQxJnF0ZqTSISmlKRvUQCCMdKQb
U6kBCa7yIVukgDJdaJELYGCMkWGik0aZkBvcoCJvJEgJNFDMDByTIZYkwzJnORFnIlGJ05PmkZZn
EbChAIwYsJ9ASlACMhTzmwr+0aJHXCmQT06GhOuMXqtMcAKLCHCA9YyIPj+yUM2o00e7JIMTG5JQ
BxSzIMJUiATFGERkNpSh9gqWkKgJEUiSYZKSFIgU23iQDGAgnhmwQEcbcoAOjoSfDiUdRLlHEUha
tH4pJcNKM3qQeMZzpkIEqWdIh74IsbMi/oMkN7npTaEOlagGiUD9MGARDGayIzjlDNmayiDKHS2h
U60qDIa6kABeIKYUseNGuBhWe+mUTCTdSD0zcE8axMCqUlzISwEpT4lgkpwV+WAFbBoaprLIbhPl
SEHJkAIVYBSrRX3pSy2AT4dgcgJbDK1EakhDdDb2riaKqJ12d4JrmoAimn3+JhleGxG5YkSGMzTt
aQsporpFFiQETQEZTvDOCL40A1icbW29mJEjylC3BjmA7UTaoaeyiqxkqOcNFuCADnSWIdJ9QEIF
YgLaNuSwdZVIGJFIw4WMN6eyOpNZV2JSMnCXAQz4rkPeW17PelG0FXFuDRXyXrE+tEGCcx+BBcLN
CHBzARYxL3klrBBmDgTAEcGtPwnSX4NRV07zhUk9ublIAQwAIossCIVnW+CShLGTuj3BZN2F2gUl
mFcoOIEJShDHoGqEuGQYgJAHYOJfLmSRRBaAig1CT+meZL0bHsiMS+PYPL2uTistSA1qYIMboKC4
J0WpA0jQYop8ucRIJgP+DY5cYiJzeMUrYa9BvkwQJ9M4vgRSraHYCgMYxOCvCElrVbNLUIzc4M+l
NLFAAI2QP5e4h0u2CZ21WWbQhLI/evbUVRuSVkmWoMMoEK5FBOBoIQ+E0QZBtIlPbJAOm6QEdj5I
CsA8z0p7mLf4Ue1qF9JIliqk08ck6DtvYAOLHKCUPYwBDBbdaEcrOQZrVjGcO0JPW5PBmq2eNmnI
luuyga3XENGAfulcbIKgmSGKVLRAlk2GPx9kyOqmgZE53GIGLIABEXZ1NQ8yZdZculNXjkhgOWJN
O8M7AKxGyJCJnHB2txvVSV41QbY873naGb8Yh0h5N94QbBckxxSpQaz+M1Pl9uRVJsT+JZoZqZCV
C2DL63Y4o0md6IRPvNwGwXjGE7JxfRNkyASxQZcPQuuHyLviBsYzeqwbrN2Vl54kkKQ3ycyQGjib
5aS8OrPXfWonax0h1rzmQBigAhXcG78yTruOOb4QAiycDEJHyKQjgurdhq08ulbaDnlYkFmDfCBi
puSnC40QGZRayQmh+aoBzWiHn7qUJ5a3Qqw5azKUXQX4vYiQCcB5mxMkBaKme93dpXRYeRtuAVjp
n2mA81Sqkp4DCbXYC+LoHvY58YnmersH0mfHG4TiC0EB2TGf+YrMYAYD4HwBChJ2ifh59FQ+8K9u
/BFFrhEAEkwIsCf+DGS4t34gpOb9Q9hdd98fhMsKYUAHOqB+Bqj9BCAY+ZufXoIZyAD5BCCIx50P
m5Jb58a20gDchBA7Vm0lQAILkIALcFAPYAHad0+dhQJhF2urFn661xC3h2iPxxBxdxCXh3Fp13Mi
2HMHgX8KkH8dGBG9lxA1EALyZ2k1Fh0RxXQG0QA2aIOzJYIIUWIbJVOw11LItRDEJhALR2TuRga3
5xAyRxDQZxDNVxBlx34NYBGcV4UE8H0N8QJJiBCSZy7SZxwn5xACeIMN0G8tFwAuJUFB9IIQsWVo
Zmq7d4EMIXN2poEMsX8CIYWad3xViIEiIF0v8AILAW2vEYPOwlP+FKEBHcBNOBgRmjVBGfCDEmFi
Emd4MkCJpyZ+Smh+A9GFC+F3c3cRBHB8yed5BbGCgSiIgygb/yYcNIhrFrF+GtCIjnhUA1FtEbFw
ilZqAcBoMeBkWziHnDgAyBcROZZ2VDgDnKcQDqeKCmGHFcGGleF/x3J6TCOLDQBdDPEAg5Vt2lYQ
beZmZLBIjAd9nJgQwQhvA4CFZGBvCogQMlZe8bcRqBiIzBiMEwF8S2WIuZF3lRNHhfUQR3REDXgQ
PtdsSAZpmSiHC/kQgFaESoaH9qWAEFYSvZeKzngQK2gRq7dtX+ga/lg6YiYQVVSSJnmSJBBbYoSL
0vaNlihkSPf+cDGXak0ITIi3aDFAjKuWcDcwjxT5jh2BZAOAaBu5EOfokEd4GvzYfwK1O6o0Zg+h
kg/wRi94kARxiaYWk3GIhAcBfUJ5k0QoAzIAdAaxAGWngPiWEBZlUQ+xkyaGj6f4h6lYEdDohbDY
PGEYEhbVTT7WEM40WFhEZrZmlbo4ADCXappIewZRhJ5nf0IWAOgHhWe5AF8mYwYxktXkS26IZgpp
EBdpjxRRlIX4YasRYilBVYOGQNJIEJqFVINnkC32hoinlb+4aObniWQgludWEDA5EBJpdhUpZR22
lxAobF8me9fkSy54dZ0Zc8sGmhMhmguxmkkHP6iRaS9RTBX+oEWMhRFWWWCWiIlwh4G/x4QxgJXN
eXO++RD0NFUQGHvH+YQ4CXnm+ZzQGRFz2RAU150e+TZKaZouEU4dwXbaZGeKp25wN3uk9HvlZniQ
F23VJHaVJxAJuBDuGYnlZYYGkWYP91d9lpEQkYrUuWg0AKH+dj1zgl158Yp3yRIfJRJWaW4D0EPz
pqBZx3zmNpsVR5YC0ZPSJXwUaaHiFhGrhnBICJchypA0WZN2mUaEoqKxkzi65hBeNQFk8KJJ5RAx
en49aqMLqn8sSIRClmIHgV9ByhGyyaQLgZHSaZ5q2jxpMyj7aI0vcUF2ilgScUEZhKcJYW0TZ2Re
+qUUeqb+YAqRJTgDshicB4FSQih0NXCgpvgQgtimvIekFNFkcwox1ak7MnFYBxFa81hhssSnCCGJ
OZdx5RZ6VWdkPwmW13YDpDimHqgCM5CAiogQgTdnKYBtLXhsX5d4BpGKlnqkR+kQ8Uh/n5GilQKl
bZFpzIoQyhRLX3WlGMYQn0WqpVpmOodfQ1d0C/FLP5mACCoQMxADyLeOswqcedgBHFAQ7iluBCVj
dLareFhqmDUQCJdmvUepZKCFxcoQx6mhdkUziuIvAAoTIjAQ0epC1QoRnhoRsHaqOndtZOCt3zoD
k7kAskoQKKACjzmeB1GhBcEBJNueU+VpGUpcFkuErrr+oZQYAMuWlAUxlyMqa8cZfcu6KM+qNqdn
EwlLEON0QRdhWxhRdhN7bSu7EGVXqwsgca2mf4HKEBeqXxSxcjPahKAJAz/7EPLZn+oiKDv7NQcr
E3pUR8tkYRXxsEVrtGl5bZYlETcAnDPgtAZRXz2atGrJTVRbtc42lMGatf/KfBKZPYsTtopDfTmx
tQorrdMaV8yVEWTHfsVneRRxTfdHtwUxAkT3dy5hAwjwaATxoc6pcHAoEF0WtQRWbSRQs8LzMW8C
SnSqE2VbEGeLrf7lQrb7EGYpuW37thUxABUZmZnLc34aEmF3A6Z0k+Q3rEFWiieWgsEXgq6mWBTQ
GET+o2BYM7Y4obgFkbsOa6UbcXlnNxCq+hD5NYDvhYXcWxAkMAIjMLskIYEUy3CMNABJ+KZkYIXo
Gl3webPQGq0DhhhohL1hwaJ3BxQ/u75KlREdwLZTGHsSIWYFhof8iRB8pEAfMVnF5XId2hBCdq5u
ZxCgR3kOoWERgECgml4PYUQVYDlHQ8BgAYCGKxEJq8D7pMIR0WHsN2cREXgtNqFkUMErsZfd93Bo
hr8DMYog3Hfl6xBQFmUX1rALQVoBHDTXO6U8K1BHwUclgcMaR1uWaRAC+4BU5QCVVlxCnBKYOZ8c
ChGkGMJCB3oBBki3tBACmhAaVr2He0KH4Y9KkT/+JsG6CuFqGjrGZCxue/uNKQFUk2S6x1ZiE2GF
IbylDQFC56THGmFEzgXFVfPCM1wVAMgUECBGPKFvYVwQhnzIe3uAMcFXJ0tJ1zSEFKHEyUcADKDI
lbzJFJBAWJphgCRnbXPFn8w1iCvKHxQByQVeXgxcEhajqQyPDtAAhJcQ70sSLkhg7ilJ19TEEnF8
ynhvrOTLgRRlUuzEtqSNUKE0MHy4sesUuAUByWzHvewR9LRiuAwRxbWIyqUQNswRaTxPrywQePsQ
3qyxTGaqTgzMCHHHDLHJnNwUh7TOXRHKURFGtvTQCz3PHiRDE4HQQeZ2y5gRwmWD3mTGC/HPGtH+
zwPxWikVihihqNnl0Qyl0QVRAb9cx+nsycMcFX5cFZsFQhTB0KVFWhHBhlW4eReBbTeQqwqB0hqh
uQpRUGz5zPxGgBIm0yJB0wThTLbE055cGCGJFeYUQi1cEdyZQLjVXhjhdpsXwhURy9ckaHuLEnZb
pgo41/BokOZFyTJhSxugNwqz0zn9EVisE0cEATjdXBeNzlpqArSsfBKRbgJwADi3fTHxaQkRrhNR
yCt9z9N5En+9FOos2E/R01xx0xhdZ1pNBmOd2kqrAnHnzW4NEboIlhcaE9c8zQURrngtxmI8WZ4N
TiYRAqF9FBFN2hBN0V7B1efkURpt0+fE2NX+5LsCMYrOCxGJ1mYEcQJ7KROMZbFLC5QR0W9kh2/B
LdwlgUDGrdMyI6XIzRLnHNSgmkADmdhCaE0q0GKM2RAaqGoI+k6cuxE1pUAqTRDd2cTiC84SAWbb
2rYZscwpHcRj89Wt286EgdqMfZzySwZsGKuz/aV9dqARuasDzREi4L51XRDri4clMJkU4bsNzhEQ
blgHJBTHTRioE9jvLRV0TAGDFK8qW+LeVwPEaILomIQOR2om1mWnuxKfNsbr23rnjRC+28DE5+AY
4VXeyxB62rgC4dQ0keNQVdjZe0I7XhUHsJKDN+Xex5v5p5FJGIiOx0MmBpkx4dICAdUF4Uv+lGhq
gozK+RyFk4sRo7rlooq7Kt4TA3zmpW0nF8PobdG1czgQ9wl+FdiyGNHdEbGrmZviYjqmtYq6UT17
DrwRapu2jysQBZ45P0PmaeEmTAXpanG8DyEC9QiiOKnkptQRawwRLK7fQklkCSjqeX1NDYBxN6gR
p04RZ9u4q+4SVzw9fOKfpXGc3PzZ/VrpG9hn2Z2eEhGPPCbBJbB+PueOB9F6A9BvA6Cbj5mAb47P
FDt8HZDsBXEAxWsQy65QILCwREQGz64SBoyi0cQsHlPt/lsR2l6p/tqhi3SvNkmmvmlNNxuPrvye
Xx4CHuAB73RvCYjlAuGGb3eVkAe8Cnj+mA5RXMWmAimghweB1a+U6s7tSrAkS5Mz2rIOygTbPqGx
cch4EaIL58/psgoRcYoUxEMn8Qdf8YNWECEgAh6g2e+mjgWBlbQqsmSglXJXXDXQwPP+wC1/7wOR
758KqrRbuzaBNhLNFo1yJ66+F/Zez/RoqZ+Z8AzxhgFA2U1Oxn1pEBkL05ZegV56lgng4CYafAOB
9Qb5EGJf717M74auL+y9P+dz83+hbMzLbriOYsyJ+AZxT68NnB4vEIaHZErGjgsgkUjM6Vevcd/7
4PseS48vEjfuUO2T9pBRl0Cfn9HJ7fYaEQOoEAleXCMXnglXbgwHpkzoELNn8gzB1zL+zk9ezhJo
T/kTDT1gixu4jxAFoPvOl4GIhmwQ0esIoeChdqX7h5VaRr83iYVIrKCPevy3qNc3tdoocdzUrzjS
kkaysWUlKqkXYY8AEUMgGYIBBBwUQFAhQRQNUZwwYaKEA4oVS5RYmFHjjRsEb9jQqHDASJIDFNao
kTFGyJAgCZY8uPCixogmWN7EqRDEThA5ff4ESjBBgqA/hxZFmlTpUqZNnWocSjSn1KdVrV7FmvXn
gRApgcJ4EZZp2BcwzGaEGYBMVxscOzo8AdGBBroZKBK8WMKmQgYL/GbsSNClxgEIR6pd6FUhjIwH
WLpEKGBkxpkhI1YNsVOhgwwZtCL+jXo19GfSpU2bpjo19WnWrV23Nst4bNjYLCMfdEymLccUIelq
sOuA5gkUDIwfz2jDa+GEKmVINqmRRsbaBFeGTCkjxvPJGit7x5gRAwagXBdWvPt64VHRq9W/h/+e
vU/38e3fx09G9mz9OWEIjAEhlBS76Te7cPLLL+OwO4ikjATgDjGNrqNOIQozqkEAgSSTkLLwQsqL
jAcesMCCBy5AqrPOKlJvtKpczC9GGa2qD6oaZ8QxR6UA3C8psF44QIQeqTuLjA0F6NCnFRFUQYUE
GWCppJEuJCO6m6gkaL+BNKpBhuckw+mivRq76AIzLzAxRRWDc22+F2/UMU45oQL+Cs4579QRwKaq
w4ks6wY6KEmrmnSSAQUIOsCtKiFsUC0sc3q0RyylbA4niVgqYTwMMtiUBE89VWiET0clIYO6DmTN
zadUxbNVPFkNCVZXZ42PBhoeLarInMTS77/XmlwAyo1s2PCwP3ENKVItL4xspErD/HAhTTO44IGM
PB0BJ1PtggA1WZUaCgFax23VToXMJTfdqrhC6Sldb/KTz3VNiCsupmYIsLAJg6out14tvA5C7qz8
KUSFON3UggiUeqCz0r4FF111J4YP4nMpxjjOLVki64Veh8yIgO6aqrchpIwNCWT/CBKBQtkiI0M7
DpW6iAQySqyWxKRGfMABa7H+gtEpBCzOuOgWjTI6afj07HMxldEaQGSCn3KoKJSm0+hdn7S0kKQG
yZi5KRIuGM9MC5BquDOeaZS4zraVhvszosmYO267kbp1V7GCfDrkkQiQuqoOhCWjoRQC++lCf7XG
iWuCmh2ghsGWyk1TDNAkIwBBWVozgxGdCrqp0O8mPdU6S0d9KaxvYhyoAWYgiYACnDpuQcAQh5TC
jfvOWraBBPoyOkVz8gzEEhC+HAAANF8+VFI/7fznpep2O3Xr20SX+uvtHpD11oGy4XXYAc+pJvPp
tZeM2m2/HfcrF3I5V4CLTfKGFFAIyWe7pNdoWs0DUB4APqUttfEvKKNjivb+trfA6SGNgQz0F0t4
lxMbVJAgMxifAghAkPPVRCMHqNcJUsCADgwOOTexYO4s5DR++a5YCznAYB4yJjJQZEQ+88n/mAeU
zyVFgap52wOFWJS5/XCIShPIBG/CEagBzjjfQQoDmmTCBviEQN47VpYUEhOcBIyLyWEiByXSOc9B
CiE7lJsRb6LGI7ZxKqdz4wKR5ZMwogVYInMKoRbkkN6wpHtg++JCJPUnySCki4Vx1tQUcr+FmAo4
+3tMDaZjECQBUCtsjBUm47hJGxkliJykFdOSUseFVDABMhifIqOogtothJTSQeQXFwe/xzVIXzih
1BUXMsOLnIp/NTmB+zL+Z0nRDA1onwRlMtcIR2UabXVJMZlGUkgGDI6MJucLYTZJ2Mr2RQkmAMuS
lmigIcPkhFGFJIMuQ1KqznwKiqlC5ho12Ux60o2Z9SRXV9T5k2i68iMakd01LwMUPbIvgrqZXJUw
CJ1nGYmFBNFOgMDUxe2gE6HCxNE81xNPfHZUKEARl0dnddCiECckGBUoDYNS0Coq5J3KUYzMUEbL
xTxOZkjKiXa4A8Pd6MiYbOOoSD1axKAK9U702ghKFzLQppSQfS6N1klSgi/YNRSc1iFIhnD6k1uC
sZ/ncRhQlqc5pQytqBs1alob6EC1Gk2lZDhcTgzGGr0wiEMTTdZ1VmL+S5KOMgXpI0jPeiYcnwQw
gEQ867k02taOEpWxFHtn4XzS19O89SXf7OJl/6ZKpTQkIhdRkc8Ii5P/HZY+i6VbYh8rVImpdrWu
eedXdcTULRqGswuZzm0I8EqmQIQMZBztTXRITHke87XHJWL1kIunA9hsl/jDE21jVlFr3uRWFT3I
CeB6FdA+0gHdakkNjlRaliAwYq5d7lBbm15aaVcjEagABSgQnwNEloYa4g4AgOKlfM1FA7J1SudI
IKa4NMR9pdVvRlCbWvY2+J44WbCDseLejMiXAhHAsH3s+6DbsmQGz0FPerDyAPCKNcGKda15Jbxi
oayXxTKSrkIqMOP++C5MKZpxyjsti5SOrMgiOVpwhF9sVBcP+T5RXUiJZnxhpvCkJ2SQwASkXBTp
7rgojvSuc/OjYtAI2cisbS16v1wwJCdZyUx2yk4mIAE2RxkptC1zUW5gIIpo2T5BFvOY21pkPZ+m
vj6hMYZt7BQpF1oCSWFqZSjrEzqTwc4tQi2X+zxmx04aPxSg8YwHzZRCG3opY0obipaCAoqgoASP
bg2eLb3qm4SUPqy2TwUssORNc7rTblaKTXg2orN9mgwm8ACkU+xlWD+20sV2jaxnXeugOJknhmYz
U0zQmctVS9ozxJ5xkb1tBR+Q26wBAabne5VOS/nQS5mWtX8CAEP+kmEBHbBLnNsz7Dx/+7h1I7a9
QbCBJ5O73E2ZVhlzWNoALCDEqGabtu298PU8mOFV6QkIFr2UWztlPGH1yRk1t6Y6Z0XSB0yAqx8+
8mOPPM2lMfdTRuS5XpszMgGgswMQfl6Fm9zm9mTrzW/cbzmZqTNpyvjL6fyAmYPmmPXWuYP5nPSi
8Pw0Ek/RpjilbpcjSb91cYC8Qd4epncd56f1erNdg+OiWA5zQCGuQnw7vUgjPewSbpvbYe10rZAd
KZm6uAGRAt2I1fztTMf333MCddLYPSd0gSoZNqX3oNiP5kAVvOCXHnb4ztrfGuFJUCjSgAYIJ1pF
90lCPYnefEf+/ssl7zqGK6D6qkR5zRMgSOaLwvnNt5QgoFq38k7S5aOb3vcXyznTM43mptxaAoZf
COF98xsN2B73OTGs8nzlNtLL/fd9DrzXSzTr1T+l3OcOiexZwvzOKwT0C4n+icE+7+u3v+Ge7DrZ
uB8BEYTA/kuRr6fDT3eNaIADdLmL5yus6Dut6nO/A0Sr4DM5CzCT+AK/tbC/CJTAEBCBChSBCJqA
/FuzBxQ/Rmu+hRHAATQseao+60PAYpu8kdO0C2O2pMi/Njs+5MuJlRuREMw908qIn+K6E+TBblNA
hlO2QPO+71uKXcMhpdC9WOm9HmTCBFSNmzMbTQsBQstA/VP+kzVhPLYTOdEpvSZkuLizOQZctkOT
QIqjACu8suhZlbbzwjbMJIezN0xrwQmcQqAotKbYFoFLIHpzwz5UQvgzPTq0v4kLMM/JwgIEGj9U
xDf8wUXMNvZzxEgEvvWTxNMIF7+rxEhMwUx8kxLkxE/8uicExTX0OBMcRcDztlPsO0hURVDMvlYE
xISDxVYMs1ksr7YzRVt8u1fURVzUxV8MRQjLxbD7OOUCRmDcQgg7xWJMxWN0Rl6UxAhjRmd0RWNc
xGlERGrURoXQwTe6Ro9Lxm3cxlpsQ2wUxnAUR3GExgM0R2FMx3dcpkY0PTwbRnjsQ3L0vXa8xXq0
R0Vcx67+Czkx48d+jER07CSvk8ZuJMiFvMVm1DmBHEiGrMRNtDd9zKSIlMhMxMeKVLWM9Mitk0dL
o8ePJMnk+gmFnLRLhLySZEmQfLWU7MiWlEmHVMbTk0aMnElb3Ei4uySczMlepMnlssiQMKufNEof
CsrVGsmjZErei0XGUklZbMqpNDo4bKylpMqsNMmQTKab1Mqv9CGK5CSvBMuyrMqXbCayNMu1TEpG
3KShtBGfZMt+/McFiso3Mci51EucyMv3eyC13MvA3EpRvB6sFMzDbMs/LB24pBPEdMyzRMu4uUm5
fEySxDfKpBGUFB3NrMzOjExvpBjGVDDM9EyZjDvSRKz+UkTN0jRNMKQVw2TN2ASXxJwR0fRL2cTN
tXrKjILI1czNo6zLOwsyzvzN4hzMmsQP21Qs42ROUqTEilHN5pRO0KHNNBLI6cRO6rTK6FzC7PTO
VXzOUuTO7yRP3fzMNRQz4izP9eTK2+TC8WTP+AxLkAqqkBNP+cTPBKrOi7zP/PTP2dzO0ezN/yRQ
trNGxbSKoizQBTVP0NyovnRKBpVQAGUr5WyxCcVQAx09+MzQDj3OeJRKDxVRyARRLvTNEc1Ni6lP
+0TRFtXPEiVRF5XRGJ1EkDvRGWVOWTnNG8XR6awPCGWwHhVS7XTPgxzSI00gkasRC0XSHqUK9+jC
JnX+UamgCgWV0itFTybF0ivl0S310i8F0zAV0zEl0zI10zNF0zRV0zVl0zZ10zeF0ziV0zml0zq1
0zvF0zzV0z3l0z710z8F1EAV1EEl1EI11ENF1ERV1EVl1EZ11EeF1EiV1Eml1Eq11EvF1EzV1E3l
1E711E8F1VAV1VEl1VI11VNF1VRV1VVl1VZ11VeF1ViV1Vml1Vq11VvF1VzV1V3l1V711V8F1mAV
1mEl1mI11mNF1mRV1mVl1mZ11meF1miV1mml1mq11mvF1mzV1m3l1m711m8F13AV13El13I113NF
13RV13Vl13Z113eF13iV13ml13q113vF13zV130a5dd+9dd/BdiAFdiBJdiCNdiDRdiEVdg2CggA
IfkEAAoAAAAsAAAAAIAC4AGHxnAZ2pkW1rIcxL4po8JLlJlqf3+Dfn6Lf36Afn9+eY94arVwWLx1
OruGHa6YEqmiDZurAneyAWC6AGHJAIPYAKbXAL3aAs7jBuDsGOXgM+rlQurySerrWe7eauDeec/u
fsT8f9P9f+f+gfX8h/z2k/7pnf7fqP7TsP7Kp/65oP6rtOah5rCI8p179rZy99J3/OV0+vN16fVv
2Pxy3v6G4v6W2/6h0/6r5f7Y/v7+/v7+/v7+/v7+/v7+/v7+/v7+/v7+/v7+/v7+/v7+/v7+/v7+
/v7+/v7+/v7+/v7+//7+/v7+/v7+/v7+/v7+/v7+/v7+/v7+/////v7+/v7+/v7+/v7+/v7+/v7+
/v7+/v7+/////v7+/v7+/v7+/v7+/v7+/v7+/v7+/v7+/////v7+/v7+/v7+/v7+/v7+/v7+/v7+
/v7+/////v7+/v7+/v7+/v7+/v7+/v7+/v7+/v7+/////v7+/v7+/v7+/v7+/v7+/v7+/v7+/v7+
/////v7+/v7+/v7+/v7+/v7+/v7+/v7+/v7+/////v7+/v7+/v7+/v7+/v7+/v7+/v7+/v7+////
/v7+/v7+/v7+/v7+/v7+/v7+/v7+/v7+/////v7+/v7+/v7+/v7+/v7+/v7+/v7+/v7+/////v7+
/v7+/v7+/v7+/v7+/v7+/v7+/v7+/////v7+/v7+/v7+/v7+/v7+/v7+/v7+/v7+/v7+/////v7+
/v7+/v7+/v7+/v7+/v7+/v7+/v7+/////v7+/v7+/v7+/v7+/v7+/v7+/v7+/v7+/////v7+/v7+
/v7+/v7+/v7+/v7+/v7+/v7+/v7+/////v7+/v7+/v7+/v7+/v7+/v7+/v7+/v7+/v7+/////v7+
/v7+/v7+/v7+/v7+/v7+/v7+/v7+/////v7+/v7+/v7+/v7+/v7+/v7+/v7+/v7+/v7+/v7+////
/v7+/v7+/v7+/v7+/v7+/v7+/v7+/v7+/v7+/v7+/////v7+/v7+/v7+////CP4AyQgcSLCgwYMI
EypcyLChw4cQI0qcSLGixYsYM2rcyLGjx48gQ4ocSbKkyZMoU6pcybKly5cwY8qcSbOmzZs4c+rc
ybOnz59AgwodSrSo0aNIkypdyrSp06dQo0qdSrWq1atYs2rdyrWr169gw4odS7as2bNo06pdy7at
27dw48qdS7eu3bt48+rdy7ev37+AAwseTLiw4cOIEytezLix48eQI0ueTLmy5cuYM2vezLmz58+g
Q4seTbq06dOoU6tezbq169ewY8ueTbu27du4c+vezbu379/AgwsfTry48ePIkytfzry58+fQo0uf
Tr269evYs2vfzr279+/gw/6LH0++vPnz6NOrX8++vfv38OPLn0+/vv37+PPr38+/v///AAYo4IAE
FmjggQgmqOCCDDbo4IMQRijhhBRWaOGFGGao4YYcdujhhyCGKOKIJJZo4okopqjiiiy26OKLMMYo
44w01mjjjTjmqOOOPPbo449ABinkkEQWaeSRSCap5JJMNunkk1BGKeWUVFZp5ZVYZqnlllx26eWX
YIYp5osJjKlhAmiWaeaEaapZJpprPghnQWqSMWecCN5JJ0F64gkgmgjUeZCgAvXpp36GIkToQIse
Wl8CCEDUaKGTOspemxJVSqml7yX6kKaMgsppd5heJCqjo5LnKUWnoprqd/6rTpRmpJ+2+upypWqk
p62b3jpdrLIaCuygvPr627CSAovsnsYil2tGy/Zaa7PEBdpRmqxmSiu1vGG7UaDFEhtRtNyq5u1G
5DaUbrjljpYuQ+d6VOy77XYWL0bglrQuu/Vadq+p1qa07bT9ivavqfzqGm7CBStGr0IHr7Rvw5g9
i1HEL01MsWQPQ8ywSfN+vDFeHStackoLj5yYxQiLLHHIKhN2skEY/6RxzHzly9HMNS3sMs5fAXot
zze9+zPQWhEd6tE63Yz0WpAybefAVjn9NFk1Z5r1VD5fLdbW40pdFL1iew2U0qGaZbTZWYFdK9pO
Wc123HDDzXWmc9Mttf7bZcmd91B12500zH8HBe7eZXvVdeE82c13XGszjpPjifdNuOQxPQ6v5ne9
GzDmLyPuGLuVgz7o59+W/pbRqpseuOB2sW66vIFvFvnsLQ/d+l6L4x622LAP5rfvJuu+u2DDE88y
wq2lTDyfwAf/WPKFc76Q9QZfLvnrujn/N/YJSW9771eDH/7x42uNtPnEip893ipT7tADGWRwwUcH
iBDCZeS3yz7N0XqAAAdokQlMACEhSKACFQgZ2XHrfwCUSP0m+ACKSEACE7ggRBa4v4FEoAIgLMzt
XqUzdKEJAACYyATrV8GJGPCFEqCIAilAwwhE4DALo9qh5EcGFPoQIv4kWOEFIDARELzQgDG0CAiX
eEPDOBBPJdRICX34Q4eQgARkoCBEQMBFEJBhAhSA4UUscAELgLCJOPSemCBIp0VREYVWxOJAHOCA
DDiAIV0sCAw1KJD8ieCP+uMgAwdiAQyYkQKM6d+W2Li0RsUgAG9syBUJQsdK3vEgeUTIETO4wQT+
sQKHtGEiFWklHiIkBgKhoiTlOJAV2vEgB/BiQsAYRiRWBJRmrAAaFzNCKjGSUpqyQQ0IAkdJGiQD
GtBA/S7pkC6CgIZhTCJFyFhGXTZQfVMyJUJucIOKBLEgJShBMu1IxIZkUiC1lCZFLmBIazaQlEda
nkXAhoKKPICM9P4TSDgFUr9mypIj/ySDGXf5TvgliXKtMsEJBJJMiVzgoRaoYAkkwkWQVNR22CTS
L8kQxYZM1JLM7GEVDYKBkmbAkBPd4kUtaq9gCUmbD5EjSC/5xhQes6QYuEALH3KADo4koJkhm482
Cj45JjOZdExlJA+C0wyU04IG/AhQNUM69EVInhX5n1GPmlSRqhIhEbiA/SpywQwesCNTpWpVaYTQ
jaSUq3eEwQtqmpAyWiADO43IEdWJES+mNX0GbdFG7VS2lJaAjjRApVKLeRB2llSseXXIJqO6ERD4
NDRrXZHdOsqRhZIhBSqYCE5zagETuPCIznSmRGxYAQpUoDRCPf7RYN1HhhN007SifWwFcQuRvZ71
IiCs4WmeGKK6cRYkCk0BGRrQAQ1IpAQmHQhvJbtXjOCSiQw5AEYzuiGsssqq+iTDDRbQAAY0oAER
0S4ZUioQE0x3IZtcaUUg2lqGsFetsjpTW1XCSvIywLzonch93UtdW6p2mtUUZULuyxniSkhwtF3w
QDQwAAEIYAEhjch7CdwQThLkwBBZ4hkRwmHMuhRCs01XBj6S0gG4WAADyPBBYAzjARTkvWQwAYNJ
ct36GuQEnnUX6RwEYV6h4AQmqGNXN3ICFFS4xgOowTAVAmUY39gg4VRvSSpAX4IKJMiwPfGBiOot
xhZEyja4Af4K6kmGmV5xxxRBgQBiIIMaC4QGVI6BhQUQgBvjWCVkdCdB1kwQLb8vsAFKMTG/SgYY
wCAGijXIUZXJzBIoFCMDgDSNBxJpg2h6zwf5M0wITZB9msbB+0mxG9/4ghcwZNJ0DCeHUaBci8ig
zjaOdKcJAmk95zrUogZJCQxtkBSweSCmRk1m8zNYwiaErg056isJotB63sAGBQF1QwZQZ4HEAAbe
RoiFK5xrPPuZJOGE80C4aZASpya29ikyqAAAyZFGW8YDITS2BUJuCzPExeQeCLjJAGmDkLvCA6HB
lKl93/8ugAEXcW+w130QMLMG1e0h87KWyhFuqnfcL1bIk/4BvvCBEzzSArj1uAVAECkvXJ/q/a/M
NSzxia+7mwU5MkVqQOyKiflS0aOImTty7RrIQM+bTkjKQU4GKQvE0ZwWyJyRzvKD1GDfBGHAArb+
X4bU/M8EsHFBbJDmgxwbIgp/eYOHnB7vBmt37g1nHe34ZoYcHddiF7emER7up3Nau3sPgLkPwk2c
k2EBKlDBwxmwZiA7HskSX4iLw04AgZAdIaSOyK5Bg3HvNFtpAehzsRs/R5Dq070WJ8itEb551eP6
5H1vtEGsfGe1F4Sbxk784i1CeQKEXQWVP0gKaq351psY0aQqGyOXCmkaYJ0g0rZjuvOdAsMXJNJQ
d8jAsf6ffYS4fCEMUPzMKQLwyef95tbXfsHNBc/qfF5sofch/caKEFgzE/VsvvxAAvBi7D9k+wVh
cglxdQkRfjLHAI8HZCDQc9IlcQMwAzMAcLeXfv8HG8tmHfLmEA3gXAmhY+lWAlu3dRE1QJHVSnBl
doWnXuUnAATgf9oHbr3GacZHEPpXEImnAjL3eF+3g+5GBhA4AASgAANRgxDhaAJ4ZiHAgJ8Bb9Kh
cbxyXg3gAAG2gwYRAHwWAEL0ANMnaUuWENdGBuXnYrDXaEeoECbXaTNIEIWXdYnXdbwHhL43AETo
EC/QfQehcKvReckBUxoIhVF4aQthhaHXVDolR0ooef7+VgMPWH5R53fa93cymIY3l3UQdxGLGIfa
JwLa1WoLEQODd3H5xRwaVxGTdl74hhAodFIYYD9amGwQAXD+xm0yAHC6JnD/V4YJZ3vCt2aZZxEQ
OAOYaIZQ12qu1omyoYe+4XY/RxEa0FwacF65hVel5ooMAXIIB4H+RnCQSIa3mG2wmBALMAMLkHOP
VxEQ6HsLYXLFqBAxaBGHSBkXeCzKpzTN+IynuBAPwE4WAGw2JxBHN26i522KtX4BWIQmt4IEWBAh
uHUJAWTutYAQEYQJYYRkQIzCiIsQ8X2ewYS78X4fcV79FBEWMJIjSGL9eHfZeH226GmaB4bWyHLs
Nv4QCzmOJmGExLiOB0GRFtF8pIGMFpiBIGF6AnFFRFmURjlaZUQCW0htPXh9MCZ4trd+diiQCHFw
vJZyeKeGC4h44hiCHsFtU9drOpmOF9GOwxWKtYFQrTNBlVQCrLQQSGkBREkGDNiU/AaLNqaLLqiS
BbGC50cG/+hitod4KtCVZ1cQdKQBDsCB2/ZiNjaWOamJFkkRZsl+3OUaimYSrtSFDYFTQzSU1MiU
s2eNTaeXK8mXA7FnSUcQSZeQA5F44ghxjWdxQumFwqSaLpaGNsmJFAGZmLmM7xY94EUG4zRtZJBA
7zgQJVWClvZnOlYQKCmGAqGX6vVtBoGHAolrVf5ndZMokzRZEJBHnLDWAPjHi9XXTbdJZ+OGEBTJ
mxPhmwqRnIA1LuwXdCyBTOTERZeFEXZ5X1P3lEPYEGW4cL22ngOIdRS4YPaXc7y4hmTwnykpkOA2
mRJBoQvhcvvZk7bSbIihajFxTh0ReeCkZSonADQweGVnjGe2b69HBp8oddsZk8Z2eOioEHAla4B4
Sr4WiWSIkxBBjPJJcCf6GqDiLcOZF8oInCwhXyJhl95HcQxBkAKRoKUJoyG3bhD5cCEYfPWnmBHR
bwUHnz/qiAlRmUS6KPdypLGTOBzaEBJAQwLBpBKBQb/ldf04EFMWk1GqkF55ZmAYhgdBAP/le/7f
qRF+KaURcZNiKpCS2DxpMygbCZQtUVYX9FcQQal8tRDqNhDhtwBOJ14PEWkzWahTumcuFpAEUZgE
0AEcEGAIoWT3uG5kp5oRWqFkiJG36lbDFqmaoqZwIakvsVeZSgaplZzCChGhKRAHCHH7RnwM4XSj
yndTOgO+NgCoOhAQCHwEsAAd0AEHMVNmd55NFwKQhmvXSoetNpUEsagP4ZBxt6n+4iaV4qts4aE0
AU22FKcgxhCTNawKkazLygBld5gXSgawGYLSKnUzQGOuSRDn+J3dygHQV5wOgHpARmjniXMF+pez
p2cCZ4TqKhB1iKsNwYupF6k0oyjxKpw0If4CA4GvGbSvvXVEAkZs4Sd+XddNBHuhN7h1CiCdg7YA
Afl8DMEBRitOJ9icF7uzOypyjil7iDoQFhmko9eLmLUqwgKP82gTLvuyNJRBEmCpBQa2GqF7bihe
O8sQhbl1dhZqakilNkqx8BoRuDkAMIgQvAkDXfsQDgpbrbIrkWGvNfFHBAFGZuWvMytGGXGD43cD
oSUR3QRpYRdlCPGWaBsRixmrFAGhA5BYBjGZIeuFeqqhi0OvYOGRObG36PS1HlZA1ZURXMd1r0kR
3cSCfaaLZDACZqdzLmFhVBeAcvV0oXsQaQa3C5ZuJEC1yPMxbzJKH9GmGkG4BcG6iPsQr/67uLr3
cLMrEeFIk7jVsAOhuyQ2tyHBTdj4l9s3vAVAeUNItAlxZO6KWx8UQo1BNBE2FoK7E6pbuHWaEWIr
ET3LAEIoEM7qEBiWuRpwX+67vwVBAiMwAtJLEijQTTdAY2Kok406uS42h32Ub7yYttBEAQrWofZr
uliRpJfJE13LwFK1ESZgtjkXEQfclhNIEBmKEIG0QB/hWfXkl4z6bwBXo8V2ngWMEKC0RBSgQKn1
vwoxv4iENUpzv6c7j1K8ES7Lwh4hpxPBYSebtgmxmOPEmZ91bDe8EpfWZFJXZ6DWqAPxgBEIhEMs
EWQ0kj6GSTKrEK3VWiOsOCVcxV2Rv/5DEUglwcQNwcUne7JxG8bqxmZlnBKJuZgyqJ0vuhAE8IPS
SXbDRxFclmDmpMUG0WNe1jZH48d/XGRKoT8mobwdyFuHDMDRpxB3ahK1Sa1NGxGWLIfY5qQNAUID
JcIcMccDVcomlEbPS8ohsQGNTBPuBmQVNxEncFQe8K+WyxJgvEx31E0SKBEaDIQDoMsOscm5FAFK
TMgKQU3BLMo/A71QvLVOAQG55BCxpBLu5qSIvBALhWT1LBAQTBJJmMiU5gDdVMSvaMmC+meqTAb6
KGgDcce7fMQKTRVRbMJVA6xMsUQQ8EH+RM4XIWt9CbQYUU8O0FwZYHNYzBHJvF7Sdv5JXvwQMyAD
EUiq+pSseHwBdYwQIMoQ5ky/XBPRTkTFU0GS55zRC0EBZrSPEZGs5sexE6FcplhJC3HSGVHS0oVU
ZGC15jgApLqUInHTCVFI1fRaUhHREg3RplwVjxXUKpVWImxDoRyfJDZ5wUi7FMyWYlwQUJ0R4tuQ
OfZlzmyS05gSnmwQCf3ET8HTMkPRU8FOnFwR+rlAIvbQW+yDbxx2E5FpMNlNCxoT05xzDrAAK9bX
7cZb3iwTICQCG6A3CjPWO13Mqo0SXBbOHAHOI1YR7kV2LR2BEvmlNLadk2acL2FpCzaToA2eDYgR
B20Rp70Uhi08Zc0VwAzZsBTYBP6R0DodEYmnf248uRDhiaYqrdIWE/2cowWRAaMqEanHzHvtvyYR
Asl9FIxkzCeM2Fqh2Gi9EAw9EK+tS22tEI5rcEGs1Kf0oJ9mrXyNZDJxWTsbjl3JkBFx3u1VWet9
100zyvB9FbBT4TbRZUWUWgs0x7PNEIWnAnC2iNnMjuvXay1aT7zLET21QFJtwwVRxIS54BJxdgcY
y81UEi4r4UVD4Yft02ZRAU/FEfQN3QLxwTinhIro0iUe4LlartZ6A9W30h0hAg+82QPBwKNbAj0L
0w3xuGQQsADlEZRl10Lx3q0NFaiT2ml+FQ8laAq1tFRuecIkEJY8kdl3hPwHY/7FuxKWVs8M/Hym
pXhe/uWcuqwcQaf9a0F0ikFm/hNrnlXqjL8U3uZZcQAloFPNiePte4sDl64d/bQvYdW5S7xT9mR0
SRFofHhteLYYcUGwvugScawE8eIywUYYvhXNyzyo0bcCKrU+mpq4+RENBRHVVxAjgOU1AGU2ZrwN
iXM3u3sasUnVO7atSwa2DhN9nEjSkiyWDheF5+y13p7uyWu9NuAdUZt8a30y7ZcEIO4/BqoGi4Pj
hxHUjhEwq07Z3hIlPD188jamYZ4SoV4Wau5kCKHnShAJW3FIlm4z1a2jTYPUlnpPVmMXxqUPYW1h
3q0y56oDgemzfr0b/kzplP7lPd7v1/Tv1/PtbfHBF1HuwDuyMlir3riahceLtQV5YPzPApFAHuAB
x7aQBvGp2tbGKneq2/qpDpF/N9sB/+XxyEa+erRHFJVJ/XryJsTySZOy7RMaEud4GOFowS68E1rZ
KxgCZcdNLj+xPG/DIvDz5T30ILed/uhrLLit05nxbFYDjFuJByHTmiTyCbHE0wuzNoE2ua424gJM
n4HpHK0Ri7qbMP8QSwdyfZ7Ivm0Qce/f38iaFTYDCYD3d5bxeErvXme9gh/dCkFL0UQTYu1zJqP1
hPFtwyt7FVmWBUp7DrFMC3GwDD57alxh7pt4Qhx7C3HsTQcROK64FsFFrP5768sN+2006ZdhpgYh
+RVBkeUKoBCBTL2fvULYc9tP4O4LpY0I4niKu8B2EtLNEogv+18DPYIC/3xh/QdRAAVvkDC4fnWW
8F8MqwBBRuBAgmRUzFiwAEUKMiBu3BgoI4YMAQMG1qgRYEDFgTYKkonxUSQZiBcFbiRYQqQJEyNd
vhwJQiZMmjVtCkyQ8ybNnAl2/gQaVOhQokUH+iSjU6RSo02dPoUa9SdGGjRuvij6AmsMrgQ3bhTw
EcVYFCdYlijhQO1alTYfCrzh8WSAjwPsCggrEGPBkDXlCqRREexAtB9Ztowqc6bUoUybOmYcWfJk
qD15UsacWTPUAyFq3P6EoRWrUNEwTIvEK1hADRsPIZI9YZalBtoZMjggg7YEYoIJC5Yk87cuXrso
TRKEUfDAyL/F76Zsa5g30RCLyTx4cDvD5o+WnXrnHl48d6Q8y49Hn179R9PJh5Y+PVIA19RhWz9k
KJK2htu4CZo4AQUyEiKwIBs+I2OvjwSQgSK76CLIKuTiA2kkBBlMzaKCChOJw4IwwKCmzghyALsH
1BoPsqJUXK9FF4NicakXZ6QxMvfew+rGkUzjaiLBEIRpv9tcQoHAAgtCcLCCJBJMpL4KuvFJJEHy
0a4Oo/tIN4Gwu+CCB4CyLcwTNwPPqDJrRDNNGc1Ts003XepRx59Ce/7hABHknNC9HmPAa6cMNPDP
pQVUMFKkGoqrKC+BMNTQSZGilPKi+fgcAMIrpxvoAN26vMAC7HYq4U/+MvgUsxiFOvVNVV0876VW
V4W1xR6Jao8m0QSa9aTIVOC1wANcG4i4uyKliVgydDT2rq9gMgHLlEgAMdoHSKCWhIFGqDZbax+o
jVRTXyUq1VjHTRHc7swlN93IqjJ2Jwpf0kogHjfjldAFWo1rgAaJCyvXmoylsCuvnGv0JQ8/jNZL
gqgdAaY/vZXszHATQEBdi1m1Cd2LNwaqMwVpxfOjW2t96gAAYztBUN+Yo68iSyu0ieTl5IU02AwL
hklLgqLF4AIIgv7KbjvGxP2JaI6Pjljjo5BmGj2BRxItx3frsosAAohCeayfZnBQ0YFCfsk9EZ7U
MTAy5nMQ55rQspYMCy7o+QELgDKx1O+MtgkBvJvm+ymlceo78Mj8hfprsAuymoCqnSJrJ6oePfzR
gZ7sSjCL9q10KGo57fJLP8Mk1fMV/95pb8FPb4x001FnPcJ2B7rVzsgLKs5qtYsaKwXgiiVo5mNn
R27ygRG1wUqhfOe5UzIAYB4AmkAPfWLSM169detvmn7661mX0KWpd7Jhhhmqvv0nBs5n4LfdX3r6
aeANx7Wv+qwEliYNriwheQuab54MbLWlVgkuADrRAaV6rtLe9v4UiD3VJXCBR8MIkNjzvZvYwCNc
G5/iXHIYDp4sZQJBH/o+Uj+YSIls7hKeRNJGkBukQEAiUUt/XBKtDOyPfwBom0vE9LOiHdAlPnxg
EEeiOiFaz3c7GooF/0KADFqpg4f5yAFQdoIUpOAEITyfSyxYLMrBL2Z6mpTLBHKAv5QFU2tZi0uU
t7wbJq0yQCxiHI/SQDkukCvvE8lbaGeXhGRRKCeolwhfIkHv6UlgeMQVrupjID2S4SxoEdKQ4BQD
GAAgAPyTisQmVkdOrihjnWzd62jSyILUawBWK0ogGdCA3LkkgjRBVvxOQhH2hcRyI3HhR/YDqEAR
5EDdYyPzov4Cx3M5EJTHnGNNiIlMGhFuJ6TsiA0OwMQmFoUBvBIkSdZXEAk5Z4xfI8iTnMORl4yz
fGQwY2E0sAHaoMiRLDnBNoemtzcy054w+uQ9LwbMn2jtI1scCBONJx0OTtGgV8Si+uSZIHPK8neT
swrBvCYSgg2AkCOhVpgC6CzKLJMgmtRnSH+YT5GuyjMXtYk/WRgXm3BwJ6pMHxmOGBzhDESi4fQi
GQJDkSa9hGu3tOBCWWVMBJbUqCSFScWO2qaZ7iRAeayJS4NyTUL5MTfOOpAEuYYovgRvUfQZ6Ehm
MJHnyPQ+UhGmUOh5N6Iu9Z5G86hbXwSgEQp1ICxpCjZjSv4YjiYIQRIZ3wAU8JH26WWsYoSJ+IzT
kRuotCAOoM1N2rgTvbV1KZaVqz6zl1mOYYoMusvZwSazG0MJRAZldVJfxDmApgKlhbEpSANkO9ua
3NB5ysRsQUDKWd4mk029jZVo0UmT1lLGs3ppKJwUWRENNmUsjyTDbGlLE9vCZLcGzC1wQ7pZ7b5J
tI6tEV6H482XdLN2BLCrUxFTgl3KFpbVHWJ2Pyrf7r6VevVV0wFyKBDwkqECFqjAXD2LoZ6W92zC
WsBnn8K2DnSANu79Zw1mBd/50jcpccXvW7mb4TZ9sCARoAAFQCweTXEUUypMVE1qwKSK3K+/RenW
bXYTm/6xyLN/urXwhTm84yHel8c08jBBKjDkEEcAPcI9sYNuMlYZqIWXxzUKhFGF4ev+OMN4y7GV
hSLej/wXwBUQcVCsMxTRYipzOxkAGlHU1/RgWMdahrNukRpn7rDZbZ0aspGFohgQDGQCf94JlwUC
5Z3skpf7bTOV3UxnkWI5y4x2iXALUoELgHnERJGJBDS96Z8I2s42MbRaEC0eNy8a0kbd8Kkjoyma
DJnIei7Kn2UtAaBwmUPFtd9+cDNqzVS5dKZWNarpGGz0eDnPTZH1n2kdFN4IEAOfDhKgUFACXnc0
x8Am9lKVeplsh4fSX4Y1UZI9AU1veUudC5G5TeAB8v4o+tHdlitc3w1vkYDgvxUI9074rJhkc5rZ
nPJUATttxl5fe970jjf2EE4ZEGwg30YBwbiXHRSeYcBTQbGBCgQCbTO5e+Eff/NvQQ6Vhvc5KhIf
Cs9qSF1LCpMGC4Asiqrd8XqOfOSptjnEG4JroaBcKBmgocBFYls173qYit52zkEub6XrPDKzLgrc
IPYSSwbA6swLtQNm3kODN93rOPe6vk3eJgsA3W4jsXrasb5LrW9d4X7DdtjrC3a512TsmAEBz0Ui
9S5d/CUBEMDVBcJ2jouc5nWXe/YOTuy7T2bMNqm4wmBy9duSoZ1mSZ2F4454Dmtv8cFuvFQefxOg
R/5rbkN5IYy6znnWY5n1NMm7ZEZvE7QkTOhuyQ/X4f751/OY7nKPwL3xPvuRQFYDDdj4wpKI3dX3
3vkhLyrnRRwB6j88KBJI9kAUsxPpOqABWKKWUFAafbY+3/xLUybnXX1so5Cb08Tf+Uj20wDvL8zt
waw8DESJ4+af//yur7u3sQAAo4D287l6g7/2Qr6BuD/bihcfKz//k0D0Mzylgxs8iwAREIEQ4MCg
mIAQgzoEjLYH84/wY7nJsq5S470JVDUA9LousbQCHAgOpMEa5EAN1MAjAkFlmwCC2L6amD+BMMET
xKQfUsEVZEFi+72PW78wK4odfD/4G4kTcYDtGP5CIkwrkVgruEvCLuyx9Gu6AQQ3ZOu30KuJE8GO
KgQKFJSz3fPCN7ws3FI6AcyzDhS3fvs520jDoMjC+Uo66YHDQFwTMLS5AcS3GaRBD4TCoICeqQPE
uxHESIxDQhw5J/wIGwwBmwhBRgSdXlI9N5TEUOwOCOw9TORAvctDPcy8yhDFVpxEbnPFoXDEX3sj
JIzFnFO8Wyy4PxwdXfTFj5qzXwTFCBRGYczFYnyMLNs8ZOQ8z2PG1KnFZ5RGF5RGOeTCasTGY8TG
y9K8ZdxG56PGb/S4byRHwLHGavQ1BirHdRwIXhwpZkzH0mHHecSJJRTFRYtHekRGbXTFfMQtW/7U
xwncQuuKRWV0x4DUR36EQ39MwYNEyIAMRxZkyBR8yIp8R1icwCO0yI38wgrsvYk0QoDkyHu0x6aj
GGUcyZRMKlIMO3wcSJWEyfl6u5Y8upi0yYskSJMcx5vkyVE8x4UDSSPsyaGMr2BUQoMTSaLcx7xJ
Sk7KCYdkPqWUSvLLSUYLyqKcyqx0FaPsPHxsSq3MRpa8skz6SrDcRme8MjerLLNkS4ysSuDSyLaU
S4r8Sbd6ypqby7x8y71stLjUy7/cSq5EJq8EzML0yI60J8I0zMXkS8QEJcVkzMjESaqMo6vkRsnE
TMqczAW6S7iDyswETTL4TApUIMgMzdN0TP6hvB6/RM3WHES37BvLfE3XpE2fpMSm8cqyrE2bdDSm
OcnKeMndFE7bhM1xkc1zGc7kbEysNE5l9EblnMu90c0eikbotM7iTM0aOc42vM7uXM5XpJHc9M7x
pEvsRI/tPIrgJM/1JM7AVA/09C32lE/NBM/wcM7pnM+8REsywcf89M/bdM/JgM96xM///MvejAzx
NNAFBdDNHJ0sU08GldDZDNBNqs4JxdDyTCrMopiazNAPbdDsTEHnBNESDVEKja/7NNEVPcz6bE+j
WEsWlVHzfNELG01anNEcpVHuHFDo09EfZc4RPboCBVLhLEnqLNIkPVFg7DgiVVLlFBcO7f7QJ6XS
mURRwazSLL3SpIhKLfXSFvW85/zSDAWXGxXTMQXRV1GaM0XTEp1ScyymNpVTfILT+JzTO5VHLhWI
GMXTPv21nnBSPyVTQSXUQjXUQ0XURFXURWXURnXUR4XUSJXUSaXUSrXUS8XUTNXUTeXUTvXUTwXV
UBXVUSXVUjXVU0XVVFXVVWXVVnXVV4XVWJXVWaXVWrXVW8XVXNXVXeXVXvXVXwXWYBXWYSXWYjXW
Y0XWZFXWZWXWZnXWZ4XWaJXWaaXWarXWa8XWbNXWbeXWbvXWbwXXcBXXcSXXcjXXc0XXdFXXdWXX
dnXXd4XXeJXXeaXXerXXe8XXfNXXfVDl1371138F2IAV2IEl2II12INF2IRV2IVl2IZ12IeF2IiV
2Iml2Iq12IvF2IzV2I3l2I712I8F2ZAV2ZEl2ZI12ZNF2ZRV2ZVl2ZZ12XYNCAAh+QQACgAAACwA
AAAAgALgAYfGcBnamRbWshzEvimjwkuUmWp/f4N+fot/foB+f355j3hqtXBYvHU6u4YdrpgSqaIN
m6sCd7IBYLoAYckAg9gAptcAvdoCzuMG4OwY5eAz6uVC6vJJ6utZ7t5q4N55z+5+xPx/0/1/5/6B
9fyH/PaT/umd/t+o/tOw/sqn/rmg/qu05qHmsIjynXv2tnL30nf85XT683Xp9W/Y/HLe/obi/pbb
/qHT/qvl/tj+/v7+/v7+/v7+/v7+/v7+/v7+/v7+/v7+/v7+/v7+/v7+/v7+/v7+/v7+/v7+/v7+
/v7//v7+/v7+/v7+/v7+/v7+/v7+/v7+/v7////+/v7+/v7+/v7+/v7+/v7+/v7+/v7+/v7////+
/v7+/v7+/v7+/v7+/v7+/v7+/v7+/v7////+/v7+/v7+/v7+/v7+/v7+/v7+/v7+/v7////+/v7+
/v7+/v7+/v7+/v7+/v7+/v7+/v7////+/v7+/v7+/v7+/v7+/v7+/v7+/v7+/v7////+/v7+/v7+
/v7+/v7+/v7+/v7+/v7+/v7////+/v7+/v7+/v7+/v7+/v7+/v7+/v7+/v7////+/v7+/v7+/v7+
/v7+/v7+/v7+/v7+/v7////+/v7+/v7+/v7+/v7+/v7+/v7+/v7+/v7////+/v7+/v7+/v7+/v7+
/v7+/v7+/v7+/v7////+/v7+/v7+/v7+/v7+/v7+/v7+/v7+/v7+/v7////+/v7+/v7+/v7+/v7+
/v7+/v7+/v7+/v7////+/v7+/v7+/v7+/v7+/v7+/v7+/v7+/v7////+/v7+/v7+/v7+/v7+/v7+
/v7+/v7+/v7+/v7////+/v7+/v7+/v7+/v7+/v7+/v7+/v7+/v7+/v7////+/v7+/v7+/v7+/v7+
/v7+/v7+/v7+/v7////+/v7+/v7+/v7+/v7+/v7+/v7+/v7+/v7+/v7+/v7////+/v7+/v7+/v7+
/v7+/v7+/v7+/v7+/v7+/v7+/v7////+/v7+/v7+/v7///8I/gDJCBxIsKDBgwgTKlzIsKHDhxAj
SpxIsaLFixgzatzIsaPHjyBDihxJsqTJkyhTqlzJsqXLlzBjypxJs6bNmzhz6tzJs6fPn0CDCh1K
tKjRo0iTKl3KtKnTp1CjSp1KtarVq1izat3KtavXr2DDih1LtqzZs2jTql3Ltq3bt3Djyp1Lt67d
u3jz6t3Lt6/fv4ADCx5MuLDhw4gTK17MuLHjx5AjS55MubLly5gza97MubPnz6BDix5NurTp06hT
q17NurXr17Bjy55Nu7bt27hz697Nu7fv38CDCx9OvLjx48iTK1/OvLnz59CjS59Ovbr169iza9/O
vbv37+DD/osfT768+fPo06tfz769+/fw48ufT7++/fv48+vfz7+///8ABijggAQWaOCBCCao4IIM
NujggxBGKOGEFFZo4YUYZqjhhhx26OGHIIYo4ogklmjiiSimqOKKLLbo4oswxijjjDTWaOONOOao
44489ujjj0AGKeSQRBZp5JFIJqnkkkw26eSTUEYp5ZRUVmnllVhmqeWWXHbp5ZdghinmiwmMqWEC
aJZp5oRpqlkmmms+CGdBapIxZ5wI3kknQXriCSCaCNR5kKAC9emnfoYiROhAix5aXwIIQNRooZM6
yl6bElVKqaXvJfqQpoyCyml3mF4kKqOjkucpRaeimup3/qtOlGakn7b66nKlaqSnrZveOl2sshoK
7KC8+vrbsJICi+yexiKXa0bL9lprs8QF2lGarGZKK7W8YbtRoMUSG1G03Krm7UbkNpRuuOWOli5D
53pU7LvtdhYvRuCWtC679Vp2r6nWprTttP2K9q+p/OoabsIFK0avQgevtG/DmD2LUcQvTUyxZA9D
zLBJ8368MV4dK1pySguPnJjFCIssccgqE3ayQRj/pHHMfOXL0cw1Lewyzl8Bei3PN737M9BaER3q
0TrdjPRakDJt58BWOf00WTVnmvVUPl8t1tbjSl0UvWJ7DZTSoZpltNlZgV0r2k5ZzXbccMPNdaZz
0y21/ttlyZ33UHXbnTTMfwcF7t5le9V14TzZzXdcazOOk+OJ90245DE9Dq/md70bMOYvI+4Yu5WD
Pujn35b+ltGqmx644Haxbrq8gW8W+ewtD936XovjHrbYsA/mt+8m6767YMMTzzLCraVMPJ/AB/9Y
8oVzvpD1Bl8u+eu6Of839glJb3vvV4Mf/vHja420+cQOm0EGt92+MeUPPZDBAw94dIAIIVxGfrvs
oxm53ncB/OWPIhKYwAQOEoIGOtCBkJEdtwIowIm874IHlIgEErjBhzywfwShgAUqUBj5pUpn6EoT
AFYIgIhc8H4QoIgCFSgBikCQAhHAYQQMszCqHYp+/gJhIQsdQgISvDCDEAHBDGdYw4pU4IlP3CEP
/2cmFGrEimQQ4gobUsSB4O99DgGBGEEgEApQYIkWqYAF1lgBCqzMe2KiIJ0mpcUWLqSLA3GAHvW4
kDEWZIkbbOL+REBI/n0QggS5wAVGKMWVqe9Lclxao2IAgxdokSF4HMgF93gQPyJkiRNookMcWEgL
XKCNESChw6hoJSAiJAYEGeIdSWCQDGhgkwY5ABkTokQz0tAiaxxhBRq5SrxdKZKU0pQNakARWtZS
A7fkYxjHOAFfhtIiimQjMRfDyia5EiE3uAFFIIABDFyAICUoARlumQEHTHOXAqnmNYFpTkZGsJtG
/lqeRcCGAooE0wIPsIBA0ikRMXoEnmTQ5mRMmM/otcoEJyBDAybaAIPIsiDlNGcByaDOiBj0Ix/V
DD57hEwyYJEh6qQoRWMpRINktJ4dfYgnQYLQzJAOfRv65kOc2QBornQgdcRoRi8QQ4gcAIQjqWnF
SOejkoLPmR2IqgYmytKWCtWcGLCIAmn6mZviSJ8VCSBPpdoAd5LBBS4IqkEkYIH7CVSDHEzgQUFD
NpwyiHJHi6kGOkDVSgL1ogVR5AUy8NaIgFKUGSGjUjlDNhiV1E5l66g6a0ADWD7kpYOdyGEXWxEQ
IDU0Xl2R3U66kYiSIQUqoMhQLWACiWx2jLCd/ogaK7CB0jT2RI8Vn0BOIM7WTiSjFoihbx8CSMRa
RIc5PI0ERVQ30n4EoimQKAOoChF1PsCZZBhuQw6bEShGsSEHsF2wPARWVtmVo2S4wQIaMF3qOiS8
6B2ICbSrkNdexJQKXUhMRcrUDOVWtwfB7gBmMID1VnQi+52vQ5gokNjKtp7D1C9dR3rXsgE4IR0d
gIYFUOADK2QAAhCAQeirYIbMkyAOhogphxmBbcqXvp4JrZzwChENgESdGs7xeheS4xCPeMT7Lck/
I2yQE5jWXf2t8EfIhQIHqBS7GjnBgAms4QDUgJkJCXGIQfzjgqQTviW5AIRdTIYj23a8eXqd/qiu
bIMboKCfFNVjA4pIgiBXBAUykAGHRSwQGiQkBjHYcgBGDGOVKJLIBHkzQcCcPVkV6L9/3SJBYAAD
QB8Emj51QExLAFGMzEAGVbYsGURdEEAHWgCW7rJLEC0QRaPTzqCl8KNoHGkWuuAFuF4IpqfqznSW
GAXRNQifG3IDAfRz1AMhNUECrWGBKFsgJTZJCRhtkBQceyAETY2M8fNYyB5ErQ3BtHvle4J+3sAG
A+Fwjhmi7maPGgbOPkiP+RwDPxck2gNZwAI4kk5YDySchGbNbe0jOIyBuyETNStCFI1uMuQYxAPg
cY/FKRB4j5rUWt4yQWiAZYKYIKYM0DcD/jAy30IXhOIFMbPAZX0ep27t4BsJZ3gzPoBBJwTE7RZA
xy1+cYGg+tQRL8iVOz7QA+hb5COPSMnxnRCAFwQFKn9IDahdMTS3R6cMsSpIzj0DZrsbIQPI84YF
cuWK89yygAb1AOxtkBo0PN8qOHrSF7J0kx/EBm0+yLUhwnGiMzbJLXf57uZbgp5OlM7+Hkie1Y3s
hHw61MkeyNnDq+egs90g4aS4CjYv8jdD3cigX/qHNUwAguB94Xt/yLO7ynLsdFu31oa6QFTqXk53
Wt4cjvzNa+5stEt+IRxXSDhRG3cGKMAiBEh+jmuggtIfJAXBjkiqTQN47xScaAAIgKR7/k+Dtw/E
pxTtd0yBjfKBEGAAoqb0QyyefvUnZOgKCfkCGED/ijxcw7DOvEQqvXrSLFc7r8c0dfQAYlZYBhFV
fDVu81VuAnF6AjEAyjd9PMcQ7FcQE4gQbncQDMB59McAKQB6oAcCVPdiJjADVHZ+mFd+EHGBq7Ft
1XF9P/Nx6XR0+vZP+IMQCMhrC5d54ZV8yhdx6bd+8GZqydZ/pud9ArF5KkB/xweCdfeE0RZ2BEYA
xzcQDhgRlMaCA1EDITCCrOdo1CF4tuJkGqBw2VV3BBEAaqh9GYABbYgBDyB+BRFV4yZsIXZuA0Z6
QZdq7tcQZ7dsxOZ0ZKCE9WcR90cA/niHhA3xAn14EMFnLq03HFjHEHu0RwuoEGuofRmVAQWER16Y
ZXsmYiY4hUEXbxW3fskGZkTIEII4d4ZIeijoEDAgAuGVawpRb69Rfc7CPROxawnXEGq4RUMVQ/0m
EfcnijMgAAQAANMXhLKohRDndwgRe65mESYIgQRQABSofrj2AgxhhNoWibhRXuZ1Eb7oYRFRTkjE
UdnWEAKgZ3smEMknavQIX424EI3YYwMgjWSwAD5oEJ9nZBMxirGoEDznjQuxihXxiZThgr4Bgxoh
bmZYP4r0AFlFaHZXhIJWami3elqYEOoHceuWgQThg/qmEEY2XyLoEKRnkNxoiwiR/oUXAX8xpou5
EYAeAU0OAD8RIVhrtI4el5FkIAMxAGoCcHm6RwZaaIQZt2zvuGWl6HQ++I8nkYXdiJAxeY8SAWhI
+YVh0z0Q+REOYD9jSRB0dpZoSQIvhQEWUETFeG9MRxD6+IjLZllaOX0DMW+l6HCAxngEcQMgQAAz
0HzJ9xE+dnGmJpMUeBEKSX1gWBt4pTrvs0dxWAJQlhCY1ZZ0RgYjGJcOB5V8xo/OWGoFoWVjRxBP
GXFlVxAmmHwLUI0FoUdl+BCgaW+KGZO02I0V0Zjh+EiwAWkl8ULtBJQLMYwDUWeJx3TvCI9Bt5qk
eYoGQWpEuWXDVhCPSJLy2Hz7/tZqn5dHlTiRB4GH94eXBmGVMLl/WilwVteCDpUS0PQ+SNRADCkQ
5lRUXuaZH4eaffl1ZCCa8EVJBvGIacdhNoeB/6aCCHEC87VrZbh05eZ5KQBwNkBz1WmBL1kRt8kQ
85k+xoQawKkStjScY/RZJFdo+zWd/KmIB8GCHVeUIEYDXUkQ2IlyzpcQuyZNieZ5+jedBBqdAKqb
EwGkDDF0JOp/ttJtiPFf52UQDxABIdURJWcQ04aafcZ2eZeQbaeil/dwByoQKeCPVIkQmKZH/XaJ
B4FqaleXsERpWBkR3bihowajuXg9c7KkJIOTMfGkIuGZBioQCHoQ5HkDgtl2/sz0cLn3byJIAPqm
qDV6abP5EBsmYkSYoRKBkB9ZhODYm3NEKHZaF7CDpAXFWcS1VQ7BpwWxb1gmiFiab67ZqGRnmlxm
EK7JAIq6EDwJqRsGhOQJEVdJqWo6jmkzKDVpYReWEAkUShMgqg8RSB30EIlHBvQ3fwuQqqonj1O5
AHspEF2nbgVKEK1JANM1AgihR+0EnuF5f+h3Ed7oq5KXnhTxZcMKMX+3ZMW6EExkXAMBWyuZENxV
Xf4mdyPXcNE3pDUgmDPgmoc5ECaodvxIkARgbVFlEN9prmRAfuJEc9nKq7jmrkrJsQ6RkoT3rJVR
p5XSqWyhpDRRTWf0Sw2W/mImBkgS0Y5wF3cil3eptxDMN5iuyZ8+F4vYaX61ShBRxQHfh2ntVHKg
p2gRGk7o53XomYUfyYiX2hCeF3U1STOK4i+0JhMiUEZmdEY15LIQAbMxS3WcN39+WrERkbOKqgA8
22pmpqIJwQF0e6NmZXtGBptDWXl2hBDt9nu7KhC6CafV5nm2tSrC0pDEahNdOxBfG0oSoKzbRbYY
oYTS6qc32xDzeH4ZK19/+acKYbQZ8JbsJnG5CqD9Z4uzGBH6R32tsiuRgbKM27jxBLYnJkP9ihFy
h7bplVoSUWx6VnrOWRCX6WYQ4QCPyhEUSlnPBqQem4Kgy3qLY7Jggac4/kG7XstgF0G5lXu2c+e7
v7tbZIcQ4gqQstcSRFl5Fdqxlvq8pqeqDiF+JEC4yPMxb8IYYZkThFQQj9us20uqGmG5vDuIEuGP
yGtjvvWzA1G+B5GfKzFlVWaBzsaxBdmAcguQoadgqTRC0/Mz9RoWsssT2Ou4AKwRkqt0HEgQA6u5
BPCd+6WII0y8IzAC+1sSKCBOBNCjZleBH/aDbqeiYOZ5ejsQqNRiHxEBa5QWcvTBimO9PtG4MQxS
G9FamZu5CZF8OslJn0sQRYoQhvRAH2FaKECdQNh7mTqVbzsQ0Dd8DKFGwlQBD6SvJ4wQLcZilnM0
TNwVMEi9FNG1UXxQ/nPMECVmtVaMECrAoDiqxtfWxSvRaQyIrqbIEJBcbSvMEKa0SE+kEPr6EN5l
xNVLNOTIO1tLFIZUEoFMd74lkEUGEYK5a6O7cALByCpxwK2Fc9xKWQ8xihBYingHfQ/GlqymyXp6
EG4sTGSGFUqTx1zhxEbBPyZBvwkRbVZrtQwxphQLbTPxnb3nlxFxjVSYiGdIEUi8SBQQzBhRgN+1
zHjMx1eRv0mxAbJME/imyik3EQqaXR6gEJYZEztZrmbVdREcEZy7y9AmlAtRAdkURXF8ygiBX09k
n+0Myso8OIvrFONsgAqhSyqBb/PVudS8EBEFTR8tEDRMEl0Yukar/kfilAKd2xAQvMueCc1idkqq
VBBi6xDaZM5SkczsXBUB2NMeAQGpJNQ13UfD/BG+ZhDY2NIR0U9ORq4L8cccEc/rlNKthnzXCIEm
KrMNgckMMVNdvUjC5NM8PUX0CtQgwUbp/E5tzMERwdXQhsZM7RDRxQAcUIkLQdUZIdVFW4YOMMQS
4c2uyI4ia8JHfRAzzUZcs85oHRXMHBU+WQEQLVOHLdktdswI4YUdnWMVDBF3mF6ufM2xXBIMnKDt
JL4SYbUDgG9wnVSBfGhw7NjrXELuTBXlhMmY3RBi9EEJ9ca53RC+ldWd7Y7tJk52KxOXCZDYbM8N
PFymWhMiUFtN/rHEE43MxNrYJ1FPQt0RCI3JOl2qJoB3NQDBVGiM+igQVh0TnIZhZSWYrvqxB3Fk
z/1eJyHdSlHWMnN9XuHGUPTbnHnYLgXMmSwRm3eFyreMc11qHAerfGYC0FTYJXHStyexDgCm/pja
RWZaBh1GJhEC9m0UkVTdVVPbW3HJxvxOkuvQnvwQNwC+cvlwww2ozoaiXBZR9xwTn5W5GTCVQQsR
UafhG8HQFtFAR8HT2E03ICHiNYHO/t1J+vpB2WRPrBhOKuBvL/3eHOl7aNps/XS+HHFUD8TXXFwQ
lawBBKACB1uYTb3KGy5TJdG1ep0T+F2/130WizTZGpHY3y3E/hTnhWXnzdr4Zzucl3sWoYXsESIw
w8lNEDGsqhrgsNsJES4erSHHEUK+XWdkEHHeM3MeGKijMEreFYcmRRCVt4BtEOJdkuW9ou7HgvoY
vSLBaR8dw95nAg6A5slXhZJOEB1YiCZcwhexQZBbEJsuE58eVqBqOSl05FhxAOIXpRFxhdtocRur
1Ib6EoBd2laIZZ1GAPzCgP1Ig74e7McqV/97r4zeE9TtMHZyMcweF60riwNxnhv3lBvZEbYEERFa
ECOw6P35gHqWXvZMcQvgvRuRuxWhstpLBmKeOR4c6lvhJjf17m6RebBeECIgk0L6qz/HzRpBrokc
iK+GgRAX/mIEcPHxLfCDmMIagfAyZE0LNBAN7xISPT188jamAaESAV8bX5cdC0so2q1KrWUJqqDi
N7EdMN+m53Gqja5YvhDmJhAbOH/jLhDO7lrcG6ogYE3NOvMqEcoOAfFBwyweUxpCrK5taqFSWxBp
/OI4F3GZZ7gg+3Gi604N5AEekHqDKnREd7NhB5UB4I/8mBDHZgMbuIQdeBCtXV9Zr9szBfP46vCM
vVBY2z6hgbT0jKF+xerwlvaenXPiFE5nXxApbYYhIAJ4jwKLyqht53Mal5f7iY2o+hCuxnybR3/o
OPKjikZfvcn8y/WcvjMUv8zikkyf4exJrRHs2rGV1PMQ/hF2zCkA8Ouo0ZQQJMDjkS6jekkQQe+a
fUb7A0GIg61qL7vwCaHRCtG/NGHkVWcywz8YlOSx1M6YprZ4vOcQtiTaZHDmaZ79qJlzAEFG4MAB
M1QQIDCQTAyFDRumuCGwBhkGDRxeNHFR4wSOEjR+vAgCBBmOE0CeRJlSYQKWKlO2dBlT5kyaNW3e
dJjgIkueOH3+BBpU6NCGMYyehJH0xVKbSWEspCEjhoABAojOMIhwwYGLMmQIoCrAhkOEBCIqZJjy
LJkaE1WayEhUo0i5OGECvVtX716+NXUO7Am472DChfcaTXuywNIXTZMuPCqQ6oABMR1kcODgZFYC
CsiA/rixlozUrwMCsHVLxqrAsUVVik7dsATGuHpFjjR8MvDP3bl9/yb6N+/Kv8CNH8/dlgYNl41v
MkXckDJlsApRXEdxAm4J7pm9awZJYIHA0ORbL5RRVWGNyZQlxl6o8jwZ5qq/DuTuEG7toLdxZ0BO
oOHsKi5AAw9EqTeNCkSwQQdVOiAE+ECCgTGbGHNKI7DasyG0iLA7QbvtNNAgAxMd4K4E/j5aaz6H
2lNvIPieUoiri+abrqrKBMqPtp9CoGsgBx7I4IEHgFPwpiQfZPJABj8asEkpp6TwsQuXyvCjqaaa
rMPQUviIxBIzU8iEE1AYaAE1xxvIBrfa0qgqsKhT/qi+gbKM76LU5pxOttku6rGmCBsi0sgHwDMs
SpsUpbJR3xht6ElHJ22SxivJsFSjpBgawKvJVBJTAzIdum7NNRtKDc6GBPDUPdccsjQxVCXzlCqH
Ar0V1wcwuMCCmUwE1kjClvQLUkqP7UvSnJRFttncEMtUpgpfOECEaBXK0igaNtwR1DFBMlVNh+CU
c7WBpArrIlnvHCiyWRFLF1AVLzogRRIswNeCB3xVibsMSDTxyGSZpclYZw+Wi+CVEGZ4sOgcu9Yh
CyFbty4VVJhhzQM8VCjH6hTaUMuLMq0YNaNsBcmEP28lgQQMXr6g15ZJGGiEmW+mWSCAMePL4Jh8
/m44aJ98Blpoo0FaruSYrDyJKUxhUNrii9VkQKEbWuO2qodTKplpdwmi7mOQcG3oZZgFJqPlEVIK
WC9iC04AgaPndlslhenGO0JVb2L6IwvxvIgAV1M6wMwQTwBpajYbGgvdePNMKUsbn25XVjn7TClF
h8zmFYKZjCwSwKGKfuluvE+H+yXUVyfqa4n/7vsiyhAaICGaDr9OphpmiKG0hiKmUCAREsuUBrdY
5VMm7nImY9eXH7jgc0PRHpr0kxCwnnXtQTLd9O2/L8p1ie8EnqyyBP8Ju5hChrX8kdutnKDJTo5x
pplj7lVfgQDgHyVgTbwA9YollOyBz4DEKd0B/hXoEBpETSAWqpb7HFKQ2XUrfSiAiEtkNbnYBU8g
suIUdariu5lMjgycw4Cv+LfCsf2vSAL8WQEXJMMFKtB73qvh3OykKQmCxAY2wMoMamfBmjCAAQuo
2kDKw7XEuKuH5PtgYnJUFY6lhER+4g7nerVCLuJsZn/6HwzthsME5tCMMiEaGc/YrLZMiHxP1MgP
B4KV2nmGNvvZz+EUYkQ+JlGJSzwJCNnlklhJJmtKTAGaNJKZBozqImaLGRdZeJK2oZGGO1HjGtfY
PU2ezoTvq8kPXXS+ATAAj/txyAEOd4IUpOBMfTRiHF2kriZCUSVWYgirSlOZA5wnOysiw3cc/rm5
6FVIknW55LIy2ckzppGZ2zMKHB0CSIUITnFEdMmZLqYCJPpRT5Gj0cOkmSejtOo0rAHkdlIUKg1Y
RCPR3B8XR5fMSC3zmZq84T1R58CTUFMhrcRY7Tpzk212E4MfaSNKSBZFDUoRmwJJ5EVC1UiHuGmH
AwHAPAlIT33m0JkdDdrWZOJP1tjARkFEH06mFksykLROHdsRB9FSuQBgTmTt+cgvexQqMuVRNG7D
3kZBOlSX5JOozrpoTHJX0VmSYaD6OeUqpfpKqvHxjz+VEXtwChmBeK0+Hntox8pSP5DMDFgoWtlg
OAqYtR7VjEZ1a6Mk5MaULNVqV3sLKmOy/gDFGfGTcpTddFAGOaYxZ4phBVuOfohVBLWVDI6N61tV
IrfISumTMTnTRRgLVbgQdKU8SisZ3ASfKZoLcpiSER1tqpEg9qmXLvWJPGUSVLxAtrJv7Z49b8sk
M01zs2UCZk1W6keyvedc6aETWmrJFt4h17Sy8wplCtCmG9j1Ig3owAZcIsmMpgR7ul3WbsWbILuN
l2HAzODYiusTb+InuG7hnRAH0N3wfXCOM0gAYmFKVvK4EnENaUCABawS7iYIvPU8sHk7+lEFT6q4
igTJZfsSXNSQQb76TUtiUuqT66hTIAIeMEq4S19lBsW2DWYmXFEsJbJZ10GdDWzYkPbB/jkh5Lcy
0Q5oO7DjDQQYKUspcHhNnOAVD/WGRC6yXA7APIG4mAwVsEAFKmAgGK+KT/xtyFens4ABgAkoyyPD
jnfsY8bVQKSyZSuSH3viJKdYxW1m0n8bQoEI1DkCvqlXaMkATAH07lMnaUuOFiAAJ+OkZWLCjOGu
c2Mh1xbOj17QGCHtIDkrRMqXpvNviruiPk8FyzeagQwC3AGLUNgnZIabmt82aTgDTc2stkmVGwJl
fEn5zjMJ0k3IxmkSpmQGIPaxno/jWDbDGqRvNrZhhD2QmEWZAlOmiX8GIgGOxETWez41sNNmoFVb
8tXJdqurvw1u9Z6kAr2qQJ1xchsJ/lC73TKR9bJdIuZ2WoTJvyH2uMkdV2Tvmyj1QgmtpZzpdZdk
Au+2dm16JGGU0NvH9y5Mt2Oob3/zO7cVP865a02Bnxi8IzRROI9oooEdtxNFEB+YUDG+coVQlrws
zw0ILIDuW+PE4wevSW0u8DKb+NgEHkhUWyUO82QzmOh8AUEIolxzmfjnNgZvt0dAni998QvkvxzW
q4t99NvikOJcHwgItDsUENxc6jPZOa/yRxMbqEDkexn6GL8O9t2Km+5yETtuhGL2mqBQfyDp30Bo
YAPs/gnlvNH63O8+3n4v/iYjAQHDbeLxs8/E74A/ZgyAbe95qjpujgf9mssY+sfr/qUklaeJ2Szg
uY9w9ymb3zbiE0962jee9inJdZOchy/My1bMPW5Ay3izUcXfvsG2Nz5I9N6XyKM9A/ja10cCEADf
75gDAZZ3UT2f/OQfmfsuWf5ecq+StJ+t9dOf5O8DbGoDb//73S/q+3GP9PC7JANaFCNGA6+QAEN4
JvmWv+9ztQAcCGhTiOari/FziSxSvZq4AS/ztiErPgJsM+QLvQi4NAO0DQX8iAbQAIVYGZgJpf8D
QAokQKMzvoGrMw20CWqrtrDjwI9wABBTGYUQPpqgKyhJvAk0QVazQLoTOFvziahrN5OIwc+QsABj
JEQRiBuUFn4ijtnrwSkUPdUx/r6ZQzcp8wnKqz8Y7EIyYCeKGojD079JcprRkz0qVEMBkbTb2zln
qwAREIEQoEOaoAAKOL2POEIwFBNUc8LWk6cWkDuVW8NCHEDa07h0YzoyoMNGdEQ6lEM5nJw7xMOD
M4kD3EOd6UPw+EONGLH2I75CFMWFscLQy8AKILjJu8ODK8LPyMSG6MMmJEOF+MSPoK0hG8VcJMWX
A72ZizJUXESaMLsvPInLKBIyyL6GCLJIk0BddEa2QkO6o4BmS7dGvAm+k57pkYljWhaXIxAefEai
8zrQgzJUVAhHtMNKvMRfCaPacr9whEdoLMXve8QQSAmDswkXyr8YasZ49Mdd/tQNcISzeqRDycvH
EqmkVCOgf2TIeiqvhqSJYBmgfoTIivS+ihwYb6wejORINpzHjqTINATJjrzIkSQQjTLJkRzHlEyd
kGRJkvzBl5RHR5PJlyzJmkQwl8RJkzzEnaxCkfRJnLzJlIy7aAxKnNRI7iFKyBLIozTBnsRIptw6
pxTFofTHoiydpqRKKrxF3WjIb/u8rRTLnGjDZ8TKgEzKsVRLqDTEElTLt9yJh1zDfNNKuDTLsqTA
s+SeqbTLqIxJx4sbsOzLwfQuvLw9puxKwlTMRuPF2kPJxYRMKJFL0NNLHazLyLRIwzy6ytRBzPRM
A5tMmKPLzyTNxgSJxNw3/pZIy2K5zNLkyb8sMs6cIdekzfj7SEiTzdmszd28Td3EzeBoTd6syZVM
stx0iO8SzuQMTaVcsdFUzuc0St+su7CkSei0zt5kxsgyzpy8zu7EzrgMN7AMTu8US7a8J6kkz/T8
meXEJ/FUz/e0TdBszx2Ez/rUzOxcINXcqNW0z/68CP6MlPx0T/8kUPbEJPBxzgJVUNNkTtTZzgBd
0Aj9TrLEG6kcTwmNTLsTmsAkINTE0A+VTAOdlAdFIBA1URFlzBEVzws9UdcsGha9z0XhyxZVT+Js
EhIVDBrV0f/TPiax0B0FUktC0UchNg8N0iP1ygnNugFF0iblR/nEt85z/tIpRaP4XNLRodIsrdIh
dUcp1dIvjdEUJcQuBdMytdIk1UmcMFIzZVP8RNOTDMU2ldMwbYg1fQkAbck51VMuzdGJe8w9BVQG
DVFQjNNANVQoDcg3/QnkPNRG5VOPrCc8FVJHpdRHfaw0+9NK1dS9HMRC3dRPVdRBRTxQJVU+JTIc
LVVANRbw0s9UddUzhdCCedVZXU83zUpaxdXovNROzdVeFVRJ/UlfFdZQVZgZHdZApc5dLbFjZVa5
fBJjbVZHFY6BYNRotVa5Q9VrzVUY1dZu9dZvBddwFddxJddyNddzRdd0Vdd1Zdd2ddd3hdd4ldd5
pdd6tdd7xdd81dd91uXXfvXXfwXYgBXYgSXYgjXYg0XYhFXYhWXYhnXYh4XYiJXYiaXYirXYi8XY
jNXYjeXYjvXYjwXZkBXZkSXZkjXZk0XZlFXZlWXZlnXZl4XZmJXZmaXZmrXZm8XZnNXZneXZnvXZ
nwXaoBXaoSXaojXao0XapFXapWXapnXap4XaqJXaqaXaqrXaq8XarNXareXarvXarwXbsBXbsSXb
sjXbs0XbtFXbtWXbtnXbt4XbuJXbuaXburXbu8XbvNXbveXbvvXbvwXcwBXcwSXcwjXcw5XJgAAA
IfkEAAoAAAAsAAAAAIAC4AGHxnAZ2pkW1rIcxL4po8JLlJlqf3+Dfn6Lf36Afn9+eY94arVwWLx1
OruGHa6YEqmiDZurAneyAWC6AGHJAIPYAKbXAL3aAs7jBuDsGOXgM+rlQurySerrWe7eauDeec/u
fsT8f9P9f+f+gfX8h/z2k/7pnf7fqP7TsP7Kp/65oP6rtOah5rCI8p179rZy99J3/OV0+vN16fVv
2Pxy3v6G4v6W2/6h0/6r5f7Y/v7+/v7+/v7+/v7+/v7+/v7+/v7+/v7+/v7+/v7+/v7+/v7+/v7+
/v7+/v7+/v7+/v7+//7+/v7+/v7+/v7+/v7+/v7+/v7+/v7+/////v7+/v7+/v7+/v7+/v7+/v7+
/v7+/v7+/////v7+/v7+/v7+/v7+/v7+/v7+/v7+/v7+/////v7+/v7+/v7+/v7+/v7+/v7+/v7+
/v7+/////v7+/v7+/v7+/v7+/v7+/v7+/v7+/v7+/////v7+/v7+/v7+/v7+/v7+/v7+/v7+/v7+
/////v7+/v7+/v7+/v7+/v7+/v7+/v7+/v7+/////v7+/v7+/v7+/v7+/v7+/v7+/v7+/v7+////
/v7+/v7+/v7+/v7+/v7+/v7+/v7+/v7+/////v7+/v7+/v7+/v7+/v7+/v7+/v7+/v7+/////v7+
/v7+/v7+/v7+/v7+/v7+/v7+/v7+/////v7+/v7+/v7+/v7+/v7+/v7+/v7+/v7+/v7+/////v7+
/v7+/v7+/v7+/v7+/v7+/v7+/v7+/////v7+/v7+/v7+/v7+/v7+/v7+/v7+/v7+/////v7+/v7+
/v7+/v7+/v7+/v7+/v7+/v7+/v7+/////v7+/v7+/v7+/v7+/v7+/v7+/v7+/v7+/v7+/////v7+
/v7+/v7+/v7+/v7+/v7+/v7+/v7+/////v7+/v7+/v7+/v7+/v7+/v7+/v7+/v7+/v7+/v7+////
/v7+/v7+/v7+/v7+/v7+/v7+/v7+/v7+/v7+/v7+/////v7+/v7+/v7+////CP4AyQgcSLCgwYMI
EypcyLChw4cQI0qcSLGixYsYM2rcyLGjx48gQ4ocSbKkyZMoU6pcybKly5cwY8qcSbOmzZs4c+rc
ybOnz59AgwodSrSo0aNIkypdyrSp06dQo0qdSrWq1atYs2rdyrWr169gw4odS7as2bNo06pdy7at
27dw48qdS7eu3bt48+rdy7ev37+AAwseTLiw4cOIEytezLix48eQI0ueTLmy5cuYM2vezLmz58+g
Q4seTbq06dOoU6tezbq169ewY8ueTbu27du4c+vezbu379/AgwsfTry48ePIkytfzry58+fQo0uf
Tr269evYs2vfzr279+/gw/6LH0++vPnz6NOrX8++vfv38OPLn0+/vv37+PPr38+/v///AAYo4IAE
FmjggQgmqOCCDDbo4IMQRijhhBRWaOGFGGao4YYcdujhhyCGKOKIJJZo4okopqjiiiy26OKLMMYo
44w01mjjjTjmqOOOPPbo449ABinkkEQWaeSRSCap5JJMNunkk1BGKeWUVFZp5ZVYZqnlllx26eWX
YIYp5osJjKlhAmiWaeaEaapZJpprPghnQWqSMWecCN5JJ0F64gkgmgjUeZCgAvXpp36GIkToQIse
Wl8CCEDUaKGTOspemxJVSqml7yX6kKaMgsppd5heJCqjo5LnKUWnoprqd/6rTpRmpJ+2+upypWqk
p62b3jpdrLIaCuygvPr627CSAovsnsYil2tGy/Zaa7PEBdpRmqxmSiu1vGG7UaDFEhtRtNyq5u1G
5DaUbrjljpYuQ+d6VOy77XYWL0bglrQuu/Vadq+p1qa07bT9ivavqfzqGm7CBStGr0IHr7Rvw5g9
i1HEL01MsWQPQ8ywSfN+vDFeHStackoLj5yYxQiLLHHIKhN2skEY/6RxzHzly9HMNS3sMs5fAXot
zze9+zPQWhEd6tE63Yz0WpAybefAVjn9NFk1Z5r1VD5fLdbW40pdFL1iew2U0qGaZbTZWYFdK9pO
Wc123HDDzXWmc9Mttf7bZcmd91B12500zH8HBe7eZXvVdeE82c13XGszjpPjifdNuOQxPQ6v5ne9
GzDmLyPuGLuVgz7o59+W/pbRqpseuOB2sW66vIFvFvnsLQ/d+l6L4x622LAP5rfvJuu+u2DDE88y
wq2lTDyfwAf/WPKFc76Q9QZfLvnrujn/N/YJSW9771eDH/7x42uNtPnEDvtABhnYdvvGlD/0wP33
d3SACCFcRn677KNZuuAHv/xRZAITOEgIFshABkJGdtwKoAABQEGIELCAD5iIBDa4wQQ2pIH9K0gF
LFCY+aVKZ+jCFgVX+BASXDCDE0GgDCUwEQeSIQIVoEAEDLMwqh2qfv4DWSELGUKCIpKhgDuMCAhA
IEME0rAiIaiAFHOYRJn9z0wo1EgWBSLECi7EiARxQAbEyJAlLlEgE6DADD1IEQu4UYpVLKH3xCRB
Ok3qBS7o4hdJUBAH+NGPCjGjQWbYQTLsTwSI5B8IbTiQCzgSjg5T35fquLRGxQAGLwiiFxMCRoJc
EJAFEWRCmjiBJ35wgYkkwyMjEMfDQFBLQERIDCbSSYJoQAPwA+VADgCCQIKAAmp0YkVEYIEpVqCV
rpwjlShJKU3ZoAYTuQAGDlKCDNxyjA8xYy+BqUZTTqQCjizmMUcnSSnFEiE3uAFFIHABC8BQICUo
gUBy6RBRDkSGGP6R5gWk+MArIml5FgEbCsjQgA50ICEAMEg43UhCMsRTImfsSC8J0s5xRsaERqJc
q0xwAoI24KMNMIgeB4KBkmLgAhmUpxIn6pGIasafP2ImGbbIEJWCFKQF6WJCBWLSk0JApdl06UdY
+tJgCemcLRRIQQ2KU4LolCAmtQBQHXKAEI6EqJkhm49kCj4+CsSgHfgoQVrQgqd60gInrYgEEAgS
rBa1nDUCaEUC6FUygFWsZHCBC7goRINIwAIZMGBEOLjBoYKGbOhrkEY3AtSpYlKkO6WoSTPgTok0
sbAb6aVbOaNVMiFVIyqVZw1oMMuHSLOkF4hfREiJwM1WBARWDf4N6RJLILvRdCMdJUMKVEARk6LU
BJZtIhm0qc1vWiAEGyhNZ00kUzvt7gTqNAEDphsREpS0ocCFyGW9WRFWwtG1n3lliOp2249wNAVk
mK56IaLSumbXIaTkLkWMycqGHMB2Ru2QXFlFW4eS4QYDYMAC1MuAh9zXvwMxwXsXQkp7trGdxUSm
QaaaVdKdabEq4eMANjwAAqhgvQkZQAwEMGGCKBi+whyugyGizwgvhMLpC5uFBCe+F5OhwwQgQIcH
HFKECEAAAwCyQRZMhhNTpLgQQes+64sQI8s2v3LCcEM0EJIScLjDHS5wQn4M5A0PecgwHglDIWmQ
E+TWXRZWbP7ZyHXTBtQyIyeYwQw2TACB1ACaBxFADEYM5AAchMgOLcGBSyJNcUr4zMqFsoG4urU7
2+AGKEBBmwVSRBKEeSIzkAGHS0sGGsgyBjL4cZMBnRJ9VgACBok0QQadPVkVqLnDggEM9lyQpWoA
pA+FJ0cxouMCdJTTnCbInjUdgD0HO8EvqWhBVE2QXCsXpviB9Z1G6oIXWFshBr11jwNtZBSglyAc
JjFDdDyAgZIB2AcJ9wAEcmyBOLkkglZICsw9EGefZrb7aa5zc9pFvTrkrts28QkGegMbCCTc4lYI
uTds7kuyuyBB7vK62e3pgrybDAtYQEfieWmBpHPIpH62q/7vQ+NEmfUhH3XAQlRt8CsHeSFX1rE6
BQIDdnNaADIItZAJQgM8m1ieGQ96RhQccoLMvCCIZo14O/U6TZ3cI+k8QM677OeEEEDOdC7AMwdS
c5vfeM9ATjhB7uxzeAZd6BIh+sXRefSBoCDpD6kBq7Oq6PV8FqF9FckNMj1nEbebIHzfcGnvTPOu
n5sMMhjxumNQcYPUwOADUYEKgs4AeitE7UU3iA0efRDLP6TnZedsmtGz32CFa4gOUTADPlzpInZc
IJqe+OETMuc6z/72ho/B3DudkHSqU/KTHzAZIv12Mxtf7SH2ckE2jxBmR+Tvnlk6ePRd43m/Pb3T
bYCW6/6tYLgPZLQDgf5BaI37hfRcIXuXfMa3PxE6K78GKrC9QVLw7eeLP7wjn/6aeQaAqgtEmufG
eJA3EAQ2XRznbN7WdguQYwTAabL2EF3ngA+YEGSHEAJGeZVHEQxIbioQZr4nEbN2f7IFbdRBfUej
Rw/gSA8wTQcheR2QfRbHUebGfBu4gORHBobHEBFYEDmIEI9nEAugfgMWaSlgfMYHAruXYDrWdwRQ
AAfxcRPRg6uBb9hRcj9jAiVwdhnnSOH0TgUBfNSVECgwAFG3gTn2cDQHgTVnbOEngmTAfAQBfMIn
EEaIeXZoZFjXYZo3gBAha1L4fSGQhOE1etLBaNHiAP63FIPIRwb9FwAr1FMYYAGWxnFx+IIBZxAS
t3czsIFtWHgQGH7C1hAfKBCTx36YVntetnlwCBEvMIEIcX7mQoLHcXcL8UeA1H0I0YiP6FsPUGkC
IYgIcWVAJmebmGONV34OkXuDFmRu+F9tdxHkxoB8qIMicF/XphCM9xqEmByGOBG3pAF/lHkCEQCO
WEFRhWqB9np5xmUvl4deh4Y4qIYF0WVAFnoDwYACYX3O135Yd4YN4YdkYG2ZtBDNKHIyZhylV3cR
8Y23pnINsUlkcFLIRIkNkXg/9nKhCI+654nJ2HUuR2L2uIAEsICpZoQS0Y+ypxCGN5DYeIMUAYyU
Qf6FwWGFGIGIt6RLEPEAFoBSFzBq4ph4sXeM7+iSXKcQosZ1MMBl9EgGPygQZqhxCmFmCoaEDNGP
CwGQAqmSrkgRFRh929g9JccR3+iQEcGF7eSFIAdz9CiU8PiHf3eRGDkQehZqyudx6nR1nIgSfiiQ
LHkQAGkRe8aWXglX8kOTHuEA7/M+BdF6jFlpPdVOG+B69uZua3djwthp9kh+W/mOA/GRBWGRAxAA
oXcDV1eMBPCMfURlgGlsl7SZCPGHEMGGqPGVsaFRpRNY9+MAB1hXCfGYJNR6hvRngIZzOid79oiM
BRFsOHeRYndwImZnoSdnOaYAw+d5AmGLDyFxo/5VcX/5mtWYlRQhm1Moi/dGix1xQbgZEedIEJOY
EO+WeIpnnMfpgOPXhnTpfwYBi03plPInEJFmZtdpi2SJfggXgPe3l9cYha6pdAo5m9GTWC9UEAsE
k6rUUNRUmVgobPF5jPN5YA5XEOc3l0AmmGM3EFC4ECdgAgwJjiWgdgNHfCmQTi4Xl375gAkKgguK
EBQaY+MSi9GzEtZET2YUWxhRmVP1Y352jNP4mo7XmeJGA8cYcd83gHfpjwjBkGSUasQno3mYkhpa
c+ApEWG6EGRHpKQRLfqGGNLWX540Riu2EUQ3YUkIpQPBeQTpeEvKe5YppSY6cyM5klB5pTepm/4c
h4sGkXMb1pxsKGt9yYrWtqPnRqeuASrewqYkY4IyIVQiUZk+aKIN4ZIiaaXQCZc0+l8gkGMZJ6oG
AY4R0XdtOEvdOREDCZuvOhvC0ieWWhewk6YQBV4NsVZslXrieIELgGcneqf8CajNOQCZRnUGUZoj
KWALkYjZSWfgJ55iKpCxmpxEaatpMyheuX+5KhDAOgGaGlylhFkO8XpaaKwPMUtmOJJeKgMzcJEI
IZ055gEkMAIHIaAOQWcEAGTdGhGZtK0EYbAVEU+QelGxMq5uYZgvQVhrhRDEBZPxFRGTKRBamHGQ
V38MUQPQiqpeSgZYJ5rHWYwaN28G1Uf+2v58MQpgl1kR2kqrCAsRUqlgGVth0kIzFfagNHGxA0Fc
DwG07AVjQRh8Gsd51qkQNUCMObZh+Ol2U/pvHcABAoGlDuCiZqZqL5tp4aagfgibrUirDUF83mcv
izIpDnsWa0oTIiAQ3CRMSLZalzUR8faFQuhxwxcRTcuAdblsiJanCcEBHGBNg8p9HPWiAxF4BBBZ
weilawh9WbmwBaGPz1YpwhKT+2cTbwu3cSsB56pdRHsRQXh2Hre0VTliBBAAJFpkRoeaCsGQGXCA
MPe365ioAbiGCHGNMNC5DzGKBrk5fMKwPsu5vptG3VRKFzG6FzEDQgiVN8BbEqFOJNZRhP53ELz5
X6jbrzipEZ45Wu0GnjnKdrB7WBC0tooTljnhu2SAvDOEEXWrEXI4h2QgvRDBgLeUW8dJBvyqpWdb
EswabvbIqIVHtst3rOvKcSRAuYFxMm/CGBCLE4hUEMCUYvAbrBrhvMEXhxGRYwKaXftJEP37Z+oI
EvS6iaFpEBE4vgexiit3fCcGThbaGERTY5ZTvDzBvmgUTBLFERxFv/l4vx7csgKxpDq8mCMwAhNc
EihAAPT6t395fwXAYXbmwrvkdsS3tBCwxUzWEThUTGlRRzb8NZgKFJ17xIalEcC1tNv7rHKGtQVx
rGaKEIrUQB+RW2MYALJXWthqEC5HAP77q1sv67EHMULidEwNRFy+qhBU1MVkfDRjHBZWiL4S8bZo
3FKLLKx02HkQ8cZjOaD5SG9zvBK7NnDk9mPk14wc9rQIQX9JFk5kRrFzuxCGPEWPrDCRHDRSRhSK
VBKZ3BBGBqBldr8z8I0NMLvNJxCjrBLypGB/LAB31roQ13d/u3muLBGoJU71FLoFsZMVVQFgoTS5
rMubmxT8YxIMPGoD4X3/O60senkz4UesyqxMGMj3+sQ69obMx6kMAcuOnBHgFIkWxRXiTMlVEcFI
sQHLTBPvJsxINxEpWmQeoBAlkL0sIaAqh6i22xClyWGQx88NsVCInMi/rBA7aQEUcP5qg/MzvHrD
HzHOJpFcM7wQvKQS76ZgOtafZNDOCXECNgnKBqHEJBGICmG4Y+QAKYCXOv2vq2x7lUm5LQbOBzHL
DjFCEDbQBw3JBs01CM0UEDBCEDDTCfGmHxFPgPbHFzFQDtAAf7QQl8wRC00GsuuQbQxzKOm6E5az
CbFKZcTNCHFd2kwVlATTBC2uU2FMWwwRZG0QIyTVD5GzOI1j+VwR6JVt4AjUEkoSbz1P3zhG+ygR
Ha1jREaRV+XXBRHVcY0UBb3VUVHGVOHNbyRhC7HYZHBqEPDPCiGIJxbAWNZ+HHYDcKwQqZ0RIyyo
rMrTCJF0HPZueh0Spk0QcHTOUP5R0HJk2FcR1eh4ZLBlx7UcyxMBwvTc2x3scjZ5TTJh0cvmbhTh
fU4G0m6bXE0hxoQ9OC893zCBWlidESEA294NEQq2eXjWpXw7o3J9TSVsEi2aECWAAtYkjj19EGfm
3vZ1EvCtFNRtReXcFSeNQ7K9as8NVSd1ao79EJLnwgsn3gR5fl26bsDV3ChB1LvGvQ0QqhIBd8Ls
4PVkEsiVFIPN2k9hgj6+EiLd4aFE2430zURuENGLEB3dYU6IrGD3xAOgAB0V0TERW0vrRwyYqhFh
4+qtESWNEQt0FKttRSBh3zeRzfndEIq8SFGd5M4YvZd2Z4E3shrKx4vLYQN1ff76A0KbTRBESsgF
/pQRYZ0dhePZVBJvO9yTo9UYXt9BnmwhDucToeYSlsUzJ4jXS7J6mBClFasCsHB1zREikMToPRBH
fKy3hK8jGRH2KxAX2MMdUa6ZHRQ9Thiog8uRbhWTXmTGR3wNAeBq2HV/KIx2PhIt+r9HzIcq6rSt
DhGvPmADZooX8eEQIbFsRAaMLhO5PlctjTVavetWcQAHGKcRYcVa2XXWJoU1MKPNiRKfLRDFXad4
xlEOgLI1Tm9aSO1qJVwX/L6o3hPyHUkig+Z7Abz/OBA3ynNkIABeC7UeYU0PEaMFMQKnjmdnVr4o
OnNHS3kasV0ZUcEW/OeZw/7SBt8VbjJb4t4WvqfxBiECWLnwNjdLs1TnDHHsCSFG3bsQx6rXdzaG
Qubyyf1fGPe8/B5DzAtRcau8AkHyLlHDKy/Yw+sQ3z4YMCoRBzamGoqDs5bnOC8QEjeyUrmbGC3h
dSpwyRdxS80QBEeKQkjt5I6u+PRaS5RGTvRETq8SCUn1UX/QzOIxpZHFFyHzSDm2vh1uvgfsN4uF
JdDZY7RAHuABo86UZbe0ERdugAwRM4hx6xeGBeHiBxFf8jXb9rT0ow8TPd73VcOz7RMaRGd8GEHA
NQqmFkHg6ST4q/rJAxECIhD55kbjBeFz3oaJU9dnOWbPy2Zu8Bd8nv/5B/5+T2t0+gShyAbBTd3U
M0xz8mojLs30GeRu1htRswhK+O9a52Q4ZbpvECSQ1FseqN/naRLHrReJqnpatourfgxAne4punOf
24v8SwBBYYIEMgUNHkSYUOFChgoTJGgYMeFDiBItXsSYUeNGjh0dMqToUeRIkiVNnhQZA8bKhjAK
vhgZQyaZGjNmDBgQAKMGDQ4akiAQVOhCnDgFDDgoI8bRAEENxriY4kbBGipUMGAg0QTGCV0HjgQB
ouBXlB5DmnxYVu1atm0rIqSYtu1cunXtRpQJteXKF309rnQZgwaNgkbV2hRKYKEAxoYRIiaw4KBe
iVOp1sBoYuvdsHczyv5F+9bzaNJzRZ8tKLr0atatE+a1WKAvzI6AycA22HiAAIwOMmTwyZAA5AUg
blg2qLSxgBqYERKw8foicpoLSyjUTDesWNdwQZNE3V38eIkVvx88T179+o7NB2Ok7dEvboRFixZE
kR/FCc0l/JdwIEABG0JsgeMKuiG6gpRaKieqCpOBN5qce+oiBQsiTCH/EtJsM5S24+6B37pLT6QS
2UNRvPAWUi1FF18k44AQKJQIhtnk68s2oga4yagD9TuBv/5KyECD3wL0z8OGkLswwt0OqqGoowyi
kQyXDjpgoQvJGCyA3ZAqaEPslPQohM4OckDENFdb0cQTYYRztBZZnP4zTjvh1LGj2fJUKC8ZZCiK
gONSaIgnnoAzyIQTUHhOMYNscK45huzD6aAMDcqTMoRotG9Kg8RMCFSOZEzIN+AeCM6zNzla9U5X
TatzoldndfFKHK2MaCW9aLCpx4sM7SlVg/IraIGgjIWSyioLEuDPxnSqMCFbNU2WWd3A/PQ660Ql
4wEMMLhgo9/GXbOuNs1qlVZ1y4oVvXbXhbetvGzdyMYXDhCBXoR0lOlSB3cyUliEUEhsAcmgpLBZ
hASQ6Shso933KWofJEMpJx/OlsyCDviPBDIsANmCByy46L8ijczgAXPf1SjdeF8G7yKWYaaZI/o4
4nOhG2+bya7hhP4y8ECDaNBNwuQahBahiXGFGGGGGzSaQ21DJYEEDr69IGsLqjZohKq//vqgIn9T
2a2ZMXK5ZrU3cjnttd+2lIalM2JJIr+shGHutlSYQYVjDUrQIEqfFhxjpRWqm2eFanC20oa4Rehb
rEkmo+oRLvoNArbO7eghBOAG/aSzzw4dZhklHSlxhm7MOSECBnjdogMUDfKEhoabISgFEFKw2eUK
0lvaurMsKPGeC5fSov8UkhzcsjN6QMTo2SXdIrdLx76htrPnnqTjFZoNptYVEspxjWon1nVHE2qu
4aOM1rfGgkSgjF4aKNzN4SdLLsHjg7D2lkEAMMCIiChl0ysJ5/44goDrdc+BcLHeAyUokZuBD1Px
Ew5OyjcS/WSkWYDCmOrkBzyJVeuDDuMI2EIGsrIN0IUNGRfZnte56pWnhhOcYNtuiEO1yS0iN8IX
BhvCo5sEpQAmyY9ULOKYjV0QI9OaDLPuo5x/YYR4BpGc1sjgwhdqiEgxnGHLGqi9MfIQh6Mz4wQv
tRARZsQGkCKDTWC3PpEwQAUHI4PQKEiZ4wkRcVc6nmBel78b3CRqDGmABg7yn/417wIk46ILwVa1
qcVQYDLbIUgymcYzzqyMnHRVc5Z1QT9K5I0H4RHszJeoDrWydgnBygKwcpDjUIchmqof3SBGqSfd
IAWMYoiAGv7ggAYo5AJZvAALIgkAiWROjJt0CDRBecYIThNuV2SjR964pYK87lgMaGV2EHKA2p0g
BSlYFAoYYDBZzpJ33OwTH514kbrphYhFCcCF9qMxMjTAn/68JBYvsADaRFItn6STNK2ZQ08qdKFx
kkkpl2RLKlnljrHbSDoXYBV2ZmVxFqlnzyR6OJ4N4E8aLIgN9Dik/wCrJwuJKEK6GBqHGgShD+Uk
GnEKuuBFRI8IOWcJ7kmAI3pko3eUJaEWIsoRklBxFzmeHA33y4UAy5+8q8EazYYSBe7Uq96xXk2/
6poKYuSnj7IBNhFjuI1YVJZ5pKilFnJFevHRnmyNYjdvsv6QfYrKUMPs0AnielAGclWsY+WhThFL
K61mJH3vzEg4aVfOcuqHne1E0FmVJUUJiXRal4qBBvE6NDKIlo4LmeSRpmaXm06ktYudpmJhC6cZ
jdIijwVc4CzSSo5w1GAEOcgpF/elLzkVb6QlQ2JWST7lqpQuM/3MYV87W2ue7XPUfRE2zwdMhAwW
IbwViVtlyS1ILWtwTbMVZngZkVRq8AAq9e5IDIqRwtIUu/eNiA7xWzNFJUSzHOJnR9zqUchN6CAC
mIHDohZIqthAqstNyFDBpFLcKqQBHeAARpbJzIgwUKzT3e9DZRtiWmlMiY8rMEneukh+UkgpPTrk
UykzA/4ZJAB2u4uIHAmAYwSh03YW/mcxLbJhMooOxCQWcUOR/CrIcZch2rVLgCVFY1/B1LjDgfBC
nKKQ/AzJIEG+qkRcsMX5eufDh10yTkec5hRxq8JkqADluiNO9hGNuAzJ0Ex+Ft+M8CdM/rkwhv/J
EHsVpMw2lS6a2SxiTC7aRQfw37CcXJAIVKACERgPnevTqYZcypsLGIBSS+If/wW6A2F+VA3KukUz
G1nRjk6yzGANpx8jxNKWjgCmR8Ox1RaEn4wpWkMkJRQGBGXSJPmaVYOUHz6D1cizhjaLGh3t9dQa
ISHD9WogpzGLoTAiNsDdAGQ5gACXBKCsOnJXqQ3rtP69et0a0TRCtGaBS3PkTCLhlsYatj+fgnl3
vSZRot89cFlVk+ClAfhBsvbIS1fA3ts5SFciSyaNARsjYC5IpF2j7ui6++BebbfHP46QFBskBCC7
NAV03ZHtSEACXXn5xBcpkkAHuXIBN+zIdW5TWe+8LRyTSJwZXm+weGUgwM2Mh8QEZYl0wOmnvqrG
5ZTuI/scu/q1+mpA8C16E30kRicLvD8VJo483Z8o6F9pql71rOP3uuVpO2lAgO2Vf93oMd+Ih0iA
gYRLpOZkMIEHpn5mkccdtlg3vHZCQAYKeARE2wG7yyfAka2MDAMWCFdHTLDPu6y98ImfLek+b3gQ
bP5ALSAAe9g1skKRdcQGKiA7rAgPetqTIeS1P/0GuIOS1CNdI8hsfUZooCBtSf3Zx8d97decfJGI
BQRMt7tXfJ8RR8o5IVyM4oWFfHPDnvntzFe+ksEPlrbc3SMWyKL1D7LMHJEBKwwIs/FpKPDxj3/5
9b/IvdcyfY4c8/IMIbJ+woog45qYcTX8w7/7Q8CI2L26eL6NwDyRCSMBWqaC6ACrgLoG6LvoQr4F
rL/RGb2Ra8C50D+MyICFCz6ZKrMGSAEV6AD487P560APTEC0ocH8044RNEFHmkBDwz6DwMAG8Ch0
y7kbpMF2M0KDAJmEeEC2KEGM8I/msQDNWQgCUv4IX0K32UtCI1RA8Mu1ClA5u4C4jtCW9OMIeLIh
+tvCLUQ8BLy1S6s7j3g5iTuIMbQIYuIJX1utvaNCjbAtTeq+NRREnjO4+oszlPM6OXS5RSyIJzSI
JjyIICMmMilAjcgbtPG8QdTE1OhC2tOaWxOB6IM5R2xER0wkDbC5g5C/9UuIuwmrQNzEWLS9aRu/
Y7oAMCQIERCBEODFjZgAgZA+hiBFMnCpYTKISlSIMmsBTFJDWZRFJKw/lFO5OOTFarRGXtRFXSQe
CuBGmJs8hLDDquoAnkA1ZEzGSGqBZcwvzwtBZ9y5Tmy7Q7y1OOSIbjw64ArHiDCUAMm4VaTAQ/5b
iPqaQXckyFksRNz7REsricgbRoZ4AH/KgNiLiAAECVgsyItEtFdMPvSjN0yrRpGIPI6InpF8gA28
vh+Mpu9zk3bEyLgTPeaztMY7CGv0RWBUPRMcl5HMCOhCtDNryZ+Mpp67wWtcPIkIRo6IoQMCDy0E
yqaEII3cQqLkRejziLEhm5XkKqfUyqA8yK3EyZTpQzGySK8kS4O0obKEnh60IZUcCbZDSy4Uyrek
nkRjSblkPhC0y9CgnrzkS7OEu74kwgMETL6ExsGEygSqS8OswcNUTHdhysYEzMKETKpLTMg8QlqM
TKqzzM00CLasSMJku8rkzCSUzLIMTbccTf6MxEuy5LiOS83XPAiBzC+vRLME8EzYfM3VbMnWxKTb
xE3YLM1nzMTfJE5p68pBZMfiVE7jPEvkpMzlhE46icsjlM0Eis7rZAjfdLYFDM3qxM7vtL2XRMDa
FE3w1Ep4bDveDKvyNM+t1E3QU0/GbM/53M7ZTLzkpM/8/EyJ8M6P8xzB1M8Alc7jXLf4bE4BRdD9
tM93M9ADTdAH/Qj5dDRFQ00IJU7xnNCq8zAL5VDtsUE2w88OFdEBddD7+s+BHNEUfUoC/aoGJSP2
VFHOxFDEOs0YtdESVdCdqtEb5dEF9dGF2tEeFdIcBcTYCtEhRVKu/MvEsk3D0s4khVIyeP5SQpSg
II3SK2XOdXSgI8XSLi04FqUZF/VQLyVTIjVTmDlNGC1T7Ly9MO1Ps3jTNZVTKl1SdRHTIp3TPD1T
JXWVNNXTPy2y6YQRLgXUQv3SOk2RO81SQ2XUCJVQFSFPNW1UBA3OjVu7OJ3UTKXTMbVU8tTUT8VR
PiWNSAXVUv1RTu280DTVVT3VPR1LxJRUVh3RNl0LP5XVW23VRV1KNMNUXPXV1PjQpZzLXyVWLbWI
Xs2vKRXLYmXWXHVUTPTUZpVWVHXWVnvVacXW+gxUV12gCs3WTJ1RRFNWTPzWcgXTFVVUUTXXdVXX
hBpWdoXXakWPIozXeqVWXc1Ce9VXY/7l1nUc133V13bZpFgFWEaNlRtK14Jd1xMRPW9V2GmdE2V1
2IfN1hZ5l4ml2G9t0k3tyYz1WLPgWIz9WHY1j84U2ZGF17g4WZS1V4Jl2ZeF2ZiV2Zml2Zq12ZvF
2ZzV2Z3l2Z712Z8F2qAV2qEl2qI12qNF2qRV2qVl2qZ12qeF2qiV2qml2qq12qvF2qzV2q3l2q71
2q8F27AV27El27I127NF27RV27Vl27Z127eF27iV27ml27q127vF27zV273l2771278F3MAV3MEl
3MI13MNF3MRV3MVl3MZ13MeF3MiV3Mml3Mq13MvF3MzV3M3l3M713M8F3dAV3dEl3VTSNd3TRd3U
Vd3VZd3Wdd3Xhd3Yld3Zpd3atd3bxd3c1d3d5d3e9d3fBd7gFd7hJd7iNd7jRd7kVd7lZd7mdd7n
hd7old7ppd7qtd7rxd7s1V7HDQgAIfkEAAoAAAAsAAAAAIAC4AGHxnAZ2pkW1rIcxL4po8JLlJlq
f3+Dfn6Lf36Afn9+eY94arVwWLx1OruGHa6YEqmiDZurAneyAWC6AGHJAIPYAKbXAL3aAs7jBuDs
GOXgM+rlQurySerrWe7eauDeec/ufsT8f9P9f+f+gfX8h/z2k/7pnf7fqP7TsP7Kp/65oP6rtOah
5rCI8p179rZy99J3/OV0+vN16fVv2Pxy3v6G4v6W2/6h0/6r5f7Y/v7+/v7+/v7+/v7+/v7+/v7+
/v7+/v7+/v7+/v7+/v7+/v7+/v7+/v7+/v7+/v7+/v7+//7+/v7+/v7+/v7+/v7+/v7+/v7+/v7+
/////v7+/v7+/v7+/v7+/v7+/v7+/v7+/v7+/////v7+/v7+/v7+/v7+/v7+/v7+/v7+/v7+////
/v7+/v7+/v7+/v7+/v7+/v7+/v7+/v7+/////v7+/v7+/v7+/v7+/v7+/v7+/v7+/v7+/////v7+
/v7+/v7+/v7+/v7+/v7+/v7+/v7+/////v7+/v7+/v7+/v7+/v7+/v7+/v7+/v7+/////v7+/v7+
/v7+/v7+/v7+/v7+/v7+/v7+/////v7+/v7+/v7+/v7+/v7+/v7+/v7+/v7+/////v7+/v7+/v7+
/v7+/v7+/v7+/v7+/v7+/////v7+/v7+/v7+/v7+/v7+/v7+/v7+/v7+/////v7+/v7+/v7+/v7+
/v7+/v7+/v7+/v7+/v7+/////v7+/v7+/v7+/v7+/v7+/v7+/v7+/v7+/////v7+/v7+/v7+/v7+
/v7+/v7+/v7+/v7+/////v7+/v7+/v7+/v7+/v7+/v7+/v7+/v7+/v7+/////v7+/v7+/v7+/v7+
/v7+/v7+/v7+/v7+/v7+/////v7+/v7+/v7+/v7+/v7+/v7+/v7+/v7+/////v7+/v7+/v7+/v7+
/v7+/v7+/v7+/v7+/v7+/v7+/////v7+/v7+/v7+/v7+/v7+/v7+/v7+/v7+/v7+/v7+/////v7+
/v7+/v7+////CP4AyQgcSLCgwYMIEypcyLChw4cQI0qcSLGixYsYM2rcyLGjx48gQ4ocSbKkyZMo
U6pcybKly5cwY8qcSbOmzZs4c+rcybOnz59AgwodSrSo0aNIkypdyrSp06dQo0qdSrWq1atYs2rd
yrWr169gw4odS7as2bNo06pdy7at27dw48qdS7eu3bt48+rdy7ev37+AAwseTLiw4cOIEytezLix
48eQI0ueTLmy5cuYM2vezLmz58+gQ4seTbq06dOoU6tezbq169ewY8ueTbu27du4c+vezbu379/A
gwsfTry48ePIkytfzry58+fQo0ufTr269evYs2vfzr279+/gw/6LH0++vPnz6NOrX8++vfv38OPL
n0+/vv37+PPr38+/v///AAYo4IAEFmjggQgmqOCCDDbo4IMQRijhhBRWaOGFGGao4YYcdujhhyCG
KOKIJJZo4okopqjiiiy26OKLMMYo44w01mjjjTjmqOOOPPbo449ABinkkEQWaeSRSCap5JJMNunk
k1BGKeWUVFZp5ZVYZqnlllx26eWXYIYp5osJjKlhAmiWaeaEaapZJpprPghnQWqSMWecCN5JJ0F6
4gkgmgjUeZCgAvXpp36GIkToQIseWl8CCEDUaKGTOspemxJVSqml7yX6kKaMgsppd5heJCqjo5Ln
KUWnoprqd/6rTpRmpJ+2+upypWqkp62b3jpdrLIaCuygvPr627CSAovsnsYil2tGy/Zaa7PEBdpR
mqxmSiu1vGG7UaDFEhtRtNyq5u1G5DaUbrjljpYuQ+d6VOy77XYWL0bglrQuu/Vadq+p1qa07bT9
ivavqfzqGm7CBStGr0IHr7Rvw5g9i1HEL01MsWQPQ8ywSfN+vDFeHStackoLj5yYxQiLLHHIKhN2
skEY/6RxzHzly9HMNS3sMs5fAXotzze9+zPQWhEd6tE63Yz0WpAybefAVjn9NFk1Z5r1VD5fLdbW
40pdFL1iew2U0qGaZbTZWYFdK9pOWc123HDDzXWmc9Mttf7bZcmd91B12500zH8HBe7eZXvVdeE8
2c13XGszjpPjifdNuOQxPQ6v5ne9GzDmLyPuGLuVgz7o59+W/pbRqpseuOB2sW66vIFvFvnsLQ/d
+l6L4x622LAP5rfvJuu+u2DDE88ywq2lTDyfwAf/WPKFc76Q9QZfLvnrujn/N/YJSW9771eDH/7x
42uNtPnEDvvAAxk8UNvtG1MO0fv4c3SACCFcRn677KNZAgAAAIhk4IAHlB9FJDCBCRgkBBCMYAQh
IztuBVCAZCCgBh2CwAQuUAIglIBDJNg/xtAvVTpDl7c0uEGGkIAECHwABCjSwBqKMCITFEgEKsDD
wiyMav6Hsl9BWEjAhbyQBAJJYAYiAoIm1rCBN5wIBHlIAQpEwDAVxFMKNbLFgbSAiAVMyAsL4gAH
ZKCMC2liEwcyAQo88SIWsAAPK3BFLHpPTBek06Re4AKBsFAhYyzIAcvogISo8SBPBCEZ9ieCRvKP
hDkkyAUuIEc6rkx9X8rj0hoVAxi8wCBhREggCdLBMxaSIIdMSAPdCMURQtCRZLAABuS4Q4f970pC
REgMJjLKgmhAA4MsyAFAoBAnVrGVFBHBHHdYR1viDZfcS4gNaiARCGAAAwcpQQkyAEwHzLAhaiQm
GaroxihOxAKTlOM3TYhJKeUSITe4wTnjKEMLDESbBP45JUNSSRBkVqQC16Tl9G6JpOVZBGwoIAMD
FsqAhLSQDNdM5zfxyURxcsSiAkmnJSl4xyNRrlUmOIFCGbrQgxBRINeM6AxLIJE1fsSlA9noZAj6
I00KpIsMYalCO9ABhpr0pCmdZQR0+hB+vtRewRLSOx+CRIGo4Kk9bWhBvnhSiF7TmhE5QAlHgtHM
kM1HNrVTx5oqkA6ooKcN8GILWpDBPw4kfvGz50RqCJKuaoZ06IuQQSsSQLKSoQRoFYgL+kiQh+rw
AhmI40RCqEiP2PWueKXRRzdCVKKSwZMOuUBKE6vAhzxxAubMCDEfm75nuiisYv2ITllaAxrsEiIp
Rf6sRD4rAZiKdquhieyK7IbTjYiUDClQAUVSagEImCAitCVDOMNZkRBsoDRfPRFqxSeQE8jzuAvI
7gKYSoYLDOS4nrVhaC1SATmGgLSfyWKI6tbbj4Q0BWQ4gXaz+xCdkhW8DUluRngIgQhEAL0EOYDt
ktqhvbIqrwIpAQEWTAAVzHe7DRHwXwliAvwu5LNGlUh548jDZibEsl4l3ZkmqxISMJjBDqbvQQQw
ABYLwCCWrXB+/clcichyljzEbTZBo14JCY66ClHwiRs8AxUbZABIbvFBLEwGGVOkxg+JqAUisE6D
ODm3BJYTiRfSgA6IZAYzOLEKCADhI8tABgJw8f6SrQzikVSAkvxFyAl+6y4RN+jHtmqAnvVcgl5m
BMxhHoACBFIDah4kBjFI8wASwuS/lkDCJEEnJYsrZ9To9kBhNTCha2CDG+x5zwM5YpspwmAAuHYg
NDg0otP8Wis3GiU3FmhBUJDQgUA6e7Iq0HRFBQMYIJogXebpnrVZ2ZAahABhfsiCjd3qVhMkzYpG
tLO/6xLNUpogtC4IRaFLU/zsWk2GJYMLXkBuhAS7A3omiDadjAL4CoTBAyAAQ4Zc62YfOckvFsi0
BXLlkjxaISmo9T1H7a4sexvPhXXrYBvCU3SndcknSOgNbECGIctbIRavNwz0TZAWQ1vJ+k51Qf6u
vIAie4TYComnq1kTXfvgmVBgXCtE9OxhhGQb2WFe8KIxnnMyk0GeAtk4GX5NhgGsGuQEoYGhKVyC
B2ukwq8uCNALQufmdVs9mY4YGEP5kXiCmcEMAfSCBz3NgQh96LuUQaIHEIB9k6HQSxfIg8scEaj3
OyEqn3XVIVKDW3vV4OtZ6k/dOhIwx1sBrnX7QL5OgFO/3dC9HsguWRzGGIjcIJyW+1PJnN1sM8Tu
UT+IDTp9EIFDROlx50zLz6Nprdmqqg8xAQMcfERRL4QAcVf8uwli76BL3u9kuLxB4nmDpxa5zLRG
wZyXfwK7S2T0Njf9Q3Sv+qtvB7WpnQjXF/4ScOUvdAEl1XaF9/5u3F+e+gUheqvPjhClK2QGKji+
VCkS7/oPpAZjRkgK3B0RopvGzuDxch6hWdiEaDRAcQORXQxlAsSGcgLRblO3AAu2XevHfgshdBVo
gQUBdwexACnWeZ4XEfA2AE+lAqNGfBLha+jHY9YnHdhHNAAQAKH0AOj0AN5lEB6YYuFHYSFVa6M3
ZBS4fg+BgQWhgZiHgANRggqYfCnAfHMGAsA3EEmGZBd3EHmXgrBxadYhgBlhAg9GApOUTp1FELOn
gwqhaANwA0AoeWY3hBsnbZK3gtCXhGY4EMwHenhYYQNgeEgmekgIEb1mhIQWAlGYXgDogv6v0yoO
oAFLBnptxUJBNUsv1IBO5WA7eG8et4c9V4VoF3SCeBBn52wr+HN5p4AXYXgEUAADMXpzCBEvEHkJ
4X7m0oLFIXgLQUho1GTGNkQB0IsaFFSUVHsCIWGXuGIshmQvhooJ0Fq814YOEYoC5mJG1xBXeBEE
kGTX2IoNAQMiIGDlphCW9xqHmBxZFy64WEZ3VxC9KINhRFzr5IAOcWbHmG9k5nj+J4TPyH74JgCy
SBASuGAD0X0hKBF7GG/X6IYbR26ftBCjyG3tRByt95AR8Uu/dEYN4YuhREnYBGPbphBqh2YDsH1D
x4b6JmGwuI0b53HHSGgEcWJGhm3MB/4RgGZ/2zgQCwmO/kcRhVgZWngsZcM+FKkBuRgRcWQBNMho
6VgQIMmPwqdvr5WTzmgQx7hzQScAMQCSVJl5FTdkDDFnFQaFC8F4DBGIZKCQCkGWFsGBnrF6u/GC
R0ORQ/kQYUhJY9iICrGPwXdoUdmMBTGFLJZ+azcAcRdPyHZiHnGQCRGICnmToHiSFGGApNFj88OF
HHFGCGQQtZeZLwSMFrABGzCJHclv6QhtKxl8qdeJl6WBOflxSDcQaJZvqYdzE1iNvsSIFyFtiIaW
F3ibUBmZuWYbH1U5+PMAhdSAfnUQBIgBlCQQwhiFd2eVWEkQpzmSvmcQraZ2ipZv1v75WoXWkhM4
EANJBoTUAPrEEApwjfLWWiKnm6DYjWb5mL15GpLJcrboER30PhFBXDVHAqHJg7wXmNI5nfiYfgLx
kYqmELKolQlBa3NGBntGSA1BhVTolNSnmN84EezpGj2ZGls2EqWEnwQBQTspEHUpfq/GgAMhACAZ
fMInoBLWSQbhfopWQE0Jbfc3EHnHiQZxAkFJnusGdRHHhGp4YgPgeAhBlheago65ECNafb9pafUp
EvcpEGqkYxeRlAQnfH+YmJh3EDQgcmiYlUjIlQgRlGU0asmHAjdQkDSpagmZpK4IpwkBd1ZaZ28j
nx2aEh6UYRsBdTAWhV+6ilOXEP779o86mmpT2Ic4Kk9kWqa/dEoNOH4FMZOpuJ271GuMGacv0KQh
15Tmcj1zgmB6EZES2RK2hVwO5BBJiYMmJxCDSqitRmacp6Np9ppsd2yFqV0KEZdhF2j/ealLGhEL
+YkUOhvC0iei2jmJg30TcaoRwUCgFXuhJ3fz5aqvSqjlx2ALQJX6NgOKFgAHwXgLQHAC0QC/BBHX
uHPMCIcUsZgZ+qu4USeekqxz4Zb0OhASUEXKBWAzBkXjFWQJMXeGdq3YWpgTqJ0FGgPIOJ1iRwA3
4AEkMAIGcY4Oka5IVgPsWhGf9K5mF6wVoU2cyjGxcq+r85NAxhAgBFq1hRDLNf6i+lVfowZ/x7dd
CMh/DFEDDbutCFt+m4argyYQAcdTBPGoZfRwNpcC6QpvF6GQHuuJxNoQXllh/Rli0kIzIRY9JGsQ
iWROyxVeNiQR/Ql/Y0ZfpCd9C4GzPbez2HZ/W5oQPMUB5gqXDlACdrd82ZYCmmiQqoihgdi0r/i0
C5F85LeWizIpWXsW30YTIkAGbXRM0QplEPGyEPFvBfFUuvpzZGC2ZzsDiUYAAeCpD1h1basQHIBY
j2qic+Z5qKijQ4iaBmGWIWsQAsltlSIslIFwNbG4AkFOUOSskZtIGrFgRfadP6e5DIFkAZBQoMtv
BEGbCiG3DUiuqCiSfWmQTv75hgjxjdwYESj4f62yK5GRuDbRSAPBu41lEZJ7ivBHvMUnEQBZXY8n
SlJnvAfBqxkxggSwS621b+/ZtPDkvLlVQYerOLiLE7q7u6wUrRgBvBoRf2NLEML1ENm1YOaabm+H
EBJrEAzKEth4jd1ZhJiVmoArqAS7EMYZu8jzMW9iQiY7wApBvuXruP86VyvLESlWuehKwQ/6cApK
EBm8ZOQaEnyImEWob/7rhw6hfFFrAhCwnCFRXm1BNCc7FuLLEwccwwq8EfxadxEnu+gaZhSpZ+XZ
tleMmSMwAjBMEg0LwkT4EJw2upCWpmYLARBQAf0FEjskU2ojxS5cFaQaNv5BobtXfL4X1aeZW3oP
8XU9Wp6kGKIO8UgS9BEi9XVc95TxKYU6x5L6lwLxZLMHwWH8RULLtcUHMUd0VHNgoUlTnMot3McQ
sbhlXFek/HngNbj0e2xgpgEc8EsN0GYBNxB1uhLGJl8nxq4rSKSCuckPgU7KKWuGBLkKUZQd9jV8
vMoEjLVH8UglMcsL4WQNuqMiuAC8PLWHTAbBrBIs5YVkWmjLW70Gya1kMHr7JxFS1kMOwacGoVlw
hsqDo0KH4ZZKwT8mgcJIaYcHMbgNwYAoEMTTmhIlsIgmYHHJnMgzIKECwYq6OBH6TEdVphGyBGcz
XDVHY80E/BHMyhIbcP7ONNFvc0bE8CsRzbeItokQfRYTD42LjEcAo/t+qKgAWrmqDaHP6gRJvvsQ
GzZHW5FHJ205JvsUzwURw6QS/aaHOleFCL0QJ6BnQsnIBYHGJEGIu3qOjPez6EqFRJyUsUtceoxK
+LwQklZJbTPSriwV9hoVIdDEcgVORd0R62ZlyGwRKKBncGu/BRHLHqHSZBCUQrmVZA0RbKqorwaP
DKGcdqzX3BxrdITYSqHKcx0VlBkVdBzaENHWBbFDF1ABkztqMmaxmey+YcZTcqsQmo0Rhj20chue
jo2Ki8Zkkh0SpF0QGiXQdC3Xnf0UAG0VoFzZFQVg/EXHDlGITpa3Lv5dsfBGAGFstAgx2xjxwwjR
AUR71QpBZz3db+Ts29wsEMJt3HLtQ59NFW/WzGs92iBAQgJRlJXU0RABXt3Z0+47ZLEdE8dpEB3g
ABHQ0AlRdQd5ZUCdu0/NFEpN0kndwlxRz/zcXCGgz3BGERU2ekuHnucJzwrBaQYLkEJZ3g4deiWQ
UHRLEYNLZwv+3CfR4EmhNBA+OE3tFRvtXwwxTOctZXUcEU+ljRW3uiBunbLYsARwXCZ+EmC9i5jp
AN69RBNBft9s4PdsEs414zRe3E1R12CBThxW4QYBzQhhbXHmEO2bEKvb2HqJdrvEeCLVfDKBW5pL
SIbKulgNzk2mxf5Yrt05seVc7uDLGugrIdTxvU/LBUkiQOELQXwmiBBwJ3ZFXqzUORDpmrngrZMk
VNsPVBCeTAbclAEuiecLCs5WXlQlsbh+bhNbLjPtHRYAtc8fUc+ll3xAV4gfLIXg6LQFgZ6Kmupn
HOAEEcvV+EsWR3cMEcHYduqo3hHQGlqrLhOcTRioozA1/hNyFNIYQdkFbre47YfTeaSwaIQ2MGST
HhJ0e9Wx/IfGntPIvhDKTq3vfhF7PVfi5cg/Ue18tdRYQ9yPcQCR+uJInI9CR24aWGgJQOQs8e3c
vYqGZgK/tMYQ0cXy/pIYcQDQqhGSy+k08eAOYycXQ+hv0b3PaP6TmYpqaNewbJ4SnNzVwn7B8SUQ
OQfTEeh0GsFY2v4QvJvFHC/tP8PvaeEmeCXybEF8JXwQIoCkcurm1KnbC1GQELGIhP2/6kZwhRaC
R3/gmFty8Xe5GAGtX2sRINC4/tTzGfPzRH83rqIu154XTCgREvae25maDdmS9QfPXmmcJHCODsDs
f+jkmCeNassQEleJdRhgQYwQn5XFLeVENhStZh86aB++zOIxpZGmS3vyHfu3FWHuN5B88dV8UqtN
ZuoAIeABHnDL9xd39OuXuAcRPkgGYmuKHDlbCZzzY85P5MRKRQPoM2W17RMaQPrNFoGp4p6Q1ri6
Dov5B1H6Av4RAiKA+qYHdtIJnp9edKTZYq+fxLVWAw82f9qW+AVBW7g/ylprvj3DNG2PFo1yJ0C/
FwDf1xrBsSK8mBZhgGveEM5fECTQ8v8ogQBBRqDAGjQGDhAwUKCAGDEECBgQgAAZgwotWkQxcIYK
FQsWMLio0ERIkmQmnDwpoaTAAyBWkgFBQeaElzVt3hSYIAHOmjp38gQaVOhQokWD/gzp0+hSpk2d
PoVKMgYMqithCHxhtGEMMjVqzABLYABODWUdkCRhgsDatQtC0ng4AGHCgQ1lQFwrkKvNFDcEEuDo
UcHLkTdRTlBZFITLqEaVNtXZWPJkykyRKvQZufJmzp09k/7Z+pIqjBeliY4GTaMiGQViJz5ly5ak
XNp0B94dIFvvTb9/CXy0aaKwTcSKGX/ueXmpZuTNnUO9/Djnc+rVrettaLNA6axDUYdWyFbu65oO
HJRdCXYG2xu9FT6MO6CGxbDkd9t035VkiZDCKy8+7joypFuOOQEPRPCinwzETLkEH4TwJq9Uw6k7
okwD76LY8kKhQxROEK4EEUsgwTwTzyqpvsHIuMEGhWSIAbeE5rvIK4v2qsnFgVazSMSLhBvOKQCP
eyCDDKpj0DEHI2SSOgJJWrJJKRM8IAQabSLNtKG4Q60kGsAajwC/PDwBxBBFLEsDE0sI0qK8WBxI
RzIYwv4NAILmm2ugKwW6SqEDSJKToooQGsjH/tocKoTFLnqg0QdQ/OzJoiSdstJIb0rSUk2l7HLL
0joNKbQEwFzrhhReStMsgUw4IaOVbKDRxoXGsqg223gko1McLdqTIojkss3Qi4QVqsqQjES2Uc8y
JYrZTZ+lzFmLooS22ur6vDArbEmiai8avKrvplTNw8hVMhbQjSA9ez0oPkLvswjbXRXakzZgFSK2
x3zJgAADf4NC1khlK6N0qIKtRTgqahtMuGHkttoWqCwPECFihbpsCFeg0oQUoxTY8sg+WSmad84Y
4wpAoZJzrWvlK+H7dVg2QzpgRBIEsuABCyyAwAKbRv4sIYOyBCZ44aOMdjhpxzBVummoMhQKVJK4
w25lyTYUM7+KYL7RIYguWnlbl+eDETdaf+QvJBJJ4ICDC96+IOebBRqBBLvvttuiZCGYTNqjnQYc
OqQHHDxww3ekwWqcqqpJy25XEisqAtbTrcUda0MIRxi/DjUkxkFzeYCGIEq5pH0t8tffCx4gw+4R
cCrySIX95kknBA7H3TKmc+edJSvZDerzkqiW+qIwzy7pAFbLPOGlySl3K86D7E1I8Yu6/JNPeUuu
YS7OVxqRpNQxuIDvgQCw8yVHB4ascEzd7z1+BQeHX377VbaeO22Fh3xDoJjvUEjCxav5COAuEKGL
xf5EIxAR4Ghb31KIveSCExHNTSGp89n50Ie+klwAWatjnZLqtxIE0O5+J5yWTUaIQtxBLSQW4l9N
aLMW5AXFQzypQdlIN5AYWqUuLaPXQAwIn4gABW9k2BnPBrbBDZYkYBlgn1BMiJMpstCKJqyiFQOX
uJdQjWIKXAm4ZpCbyC2lQ32xiQFl8K7s5QqMnvthHH1DAIY4ZII4aSPdLqC6uAmEiRzUV9ACFsKj
rRBKWdTiFXeXSPtpLF5vzBGsBKKetazIKe25SXaww8PF9UmTqaHBhmZgx9KtpAEd6IBAgGa38fWR
DH8EAN5IkDaB7O1vTkEkI7WIRUPq0lJeAZ72IP75EhsE6i9kfNOqgLRM5oWEAR7xyEDak5+S7MqB
PJGXm7BGAHOVpAHf/OaxUncBBbCgBbCsCSHf18uksNOXKKTfOw2XRzgOpZjG/AtYoMmAZV7kAMw7
QQpS0KoAQvMj0YsTPsGGIwcO82KeHMjzxDOQDyFKIODEaEj8FU2FNPEpuVzJweQ50oHwkqS8a4hD
SYLJkNQgBQvgCFsseROCoqAjBgVJjbDkSU2qNI5bkWglbcBSMpwJaKdEJTgX6tNJgbQkTj1pIgvn
zqhGyHovIapFBJo2StYwKIHxSE5rNLKSiG2TmcTRlwYokBR00yJI7UA441QQzkC1nVStKgtNmv7X
hrkQJ1lNKD3JQMOlcOSmCqCmRRxJhjaa9aw2SSvlQlLRfKEyrg0QzgkS25gElPCjeOXrLhcZ2mct
1iYBvEgxebLMzALUtR5CAUwNyiLAritUe/lcDFbDldx4VbF+TFdJZEkCVQHFo0Cx6/xAS1rRqpC5
lvrdUFCrkPYo9FD+EYpBE4BQMqi2pQWkDbw+txrXlLEkXgHZAjYLlT/WbrmEe258Q3qT28k3QoLF
SatCsl6L9NMohvVIA2gpEFgBTyxzodWusEWjDfk2PFirrVNgmb6XeLZ977XvLumH4Qw/h1UXiXB/
LUoUmN6UAacjKxkkaJtP7qUGNhDLGAkLuf76/Gao0y3JM7lbkwmTMLkM63CQkzJaIT8LUWgE3+mW
soAZcJQMM9OpRsZ4L/zB6waUNC9JgkoeU5UpxwwAs1hX0oJztveQuPxxkUe6VzVXal9upVlzRiyr
UU65lCqDF5ZtslaKouBMFglzmF/iAg0et6RpzgmH2+zLqS5aSvnCsUAq4MrqYLdGBgGTbS5SEU2i
yz5FAZEqRWQCBgRG0J7TUqGn9V5EO5qkU1W0q41yAAsKJNL8ikAFIhCB61h605jzkp4GqwICnKop
FVSIYU/d3Rr49a5ojrWsdTnFaEt7Kc27SAW0re0ImK8zNRvwqmYjwTAymAAM+A2cjYI3y/7GlaD8
bednrT1vzLyP3gjC9kUs8DYLcLs5+7IozORy59QOdi1gPndlGDDTdUL73g+Hr3Mh7uERI3GP/a5A
BnmyKKPkC1F0ihlWkaoCdC8g3NZpdcQnDvFGrxw5J7eIBTDQ710LZUhF8XVRLyID3BA8JBhtQF5q
7aRWi9TlrqZ2tY8u6peEIInahgCvhwIgMkjgMKsN0snvWBOMMqABgxl6c1Ke8qWTtuVlb0zNagKC
PcatAt4mymJQIoHE4MTShsLvSyzr9QYIJOydMbp7lY72k7KZ8J8Bwb5nrmumHCYlQRlO2mD+Eo50
gO8oIJHYWT34w1e1vj3pPOJDMGnGN/7e8XVf7UBuNvmVqCAFJP+mCTwQqaKTPfTyNfztJQOCEBhl
SEM6DN1Rb3ec/SsoDfC6CSoK+M3r/vbu43znQbCBqMg9+EMpQRIhoE6e2EAFqizacgPv/JUnnfzV
30CAnOL44gQFbnHbGVBooKO0/d0yzT//+c+ef6a4BAR5L4rTG4pW4hme4AoG6ABasr9mqb3P4z/y
y70HtDnKuD6hIMCQMLNPQb5lW0DkGrvok8AM278QBAqOk4yTMAoMgjs/ai9CE4hAA7PW6UAq+iwQ
JEERJLIbvAn1o4z/E4oMsIAI0LhCYyKFQKVAe7ICQTMd1EFYY0Kc4MHdi8KaAMKd6f4Zi+ixgag8
MGuAUDOY2ntCJoS+MLSJKRQSM3yJEuCj1cFCM9PC11u2W2ofMnxCaqPDXOu3i/BBKcQ+NRwn7nsl
Q9PCDlgAY/NA8bM9Ony4ESTBXdO1XOMMqsM+gRifIAwK6wqpD1TETVS5TGTCbfM3ppAACqAJi5BE
mzgPkRgw1VlBmwimp9o8G+REaWNE/tu3nSk9o6A7xKg7E9RDwTIPDWgAB8i5vAmeq2oQ/JvFZbRD
Emw7mhMBESgKq5s7CfBFU7xGMjiRYewYvwuKVEuOGlzGcaw3FZJF+XqbCqCACKAAMojGEIBHoJiA
mXi8kshGgUgVNekYY8RAQFKIFv5ouCUkx4E8tBwkP24LRYWAx4VkSHiMxmj8k3kkxXrERjTMR3Lx
uwVsLzIjs+SIRYIEyXIEvQd8ulwkCnoUvoE4RVRJk77LyJLIwpqwMIEMyZqcDonLv4vjtt4zCvaz
RjQkieJKwpWIyflyOJtEykQzR/5LR6lbSKLwSaFwgCJpFCXrKHSCRQdsqnNMyrIbw/xbx4tgSHlE
SaGgykaZyptww1VDxK50y1UzSBJsSJ5cibkbiieCIpwQRKW8sLf0yxRayk2cS3gEwB8cJEAUvI/6
y8WES5xkTJwYJAYUx8ekzAGxt8q0CaI5Gq1UEsz0zFr0zAL5yND8zMskzc6Ut/7TJM2vVE05vD+u
bM38a8bYDMw5pM3YdMLbfLa+1E3anM3erD3Y7M0mNM3WHL/iHM7h5MynUs3jpMHkhM6CdEzKJDvn
jM7VRE6/tE6PvM7uVIiZfAnh9EroWE7v7M7cTMrtzMTyNE/v/E2CVE9PbM/5hJK43MQPFE/6DEn0
vM/g1M//lM+RJMPOwrD8BNCuZM/GbMICBc8DddD5eU4SLFADfdC3BE3di89DotAK1c7s7LwMPTMO
FdHaDE8MHc0RRVEBrbANPSHbOcoUhdFwnM5F1MQYtVH7BMx7A9EQvdEeVdEApcXZ8dEhnVHmRLqU
KyEWJdLTZM0iw88lhVIPjf63DnNRmozSK/1Ro3yuHVUuLPVSHM1RvqpOJf3S4XzPV5vQMlXT2gHT
K0rTNYXTNuXLaXvSOLVTEtVSveqsz0rQO/VTi+jTktJTwfnTQo3Q8CTTvjlRQ2XUEpXThOFSBWnU
SX1UyzScMU1UStVP81MaAv2oBtXUUM1TR0WYSFVQUUXVLIXFasHUVHVVKR0yTanTV6XVIq1PKTFV
kazVXVVVHk2QVuXVYJXRXn2OXM0JUBXWZL1VYl2WMVXWZ4VVIHOOCc1UaPXRJq2r6rTWbT1UUo0W
YOXWcEXUaEXNFxXXc/XWdBVNqEBWdHXXWLVV13zNd6VXPC2JdsWUQPXAev7l10odIWOd034V2FEl
WA0VnGodWDjlVCN1iiRN2Ift1oKtUtuE2IqNV0lNtDe12I0dVkSlVo4F2UdVxpAlWXWF160s2ZS1
1zDdTJV1WRztJYR92VSlln9NxJkVWGaBvpvF2YddEn3l2Z6tWAcxmqAVWovdU0HdzaNlWilSWmlt
2qg9ipskA4eV2quVosyQWawV163l2q8F27AV27El27I127NF27RV27Vl27Z127eF27iV27ml27q1
27vF27zV273l2771278F3MAV3MEl3MI13MNF3MRV3MVl3MZ13MeF3MiV3Mml3Mq13MvF3MzV3M3l
3M713M8F3dAV3dEl3ZzSNd3TRd3UVd3VZd3Wdd3Xhd3Yld3Zpd3atd3bxd3c1d3d5d3e9d3fBd7g
Fd7hJd7iNd7jRd7kVd7lZd7mdd7nhd7old7ppd7qtd7rxd7s1d7t5d7u9d7vBd/wFd/xJd/yNd/z
Rd/0Vd/1Zd/2dd/3hd/4ld/5pd/6td/7xd/81d/95d/+9d//BeAAFuABJuACNuADRuAEVuDrCAgA
IfkEAAoAAAAsAAAAAIAC4AGHxnAZ2pkW1rIcxL4po8JLlJlqf3+Dfn6Lf36Afn9+eY94arVwWLx1
OruGHa6YEqmiDZurAneyAWC6AGHJAIPYAKbXAL3aAs7jBuDsGOXgM+rlQurySerrWe7eauDeec/u
fsT8f9P9f+f+gfX8h/z2k/7pnf7fqP7TsP7Kp/65oP6rtOah5rCI8p179rZy99J3/OV0+vN16fVv
2Pxy3v6G4v6W2/6h0/6r5f7Y/v7+/v7+/v7+/v7+/v7+/v7+/v7+/v7+/v7+/v7+/v7+/v7+/v7+
/v7+/v7+/v7+/v7+//7+/v7+/v7+/v7+/v7+/v7+/v7+/v7+/////v7+/v7+/v7+/v7+/v7+/v7+
/v7+/v7+/////v7+/v7+/v7+/v7+/v7+/v7+/v7+/v7+/////v7+/v7+/v7+/v7+/v7+/v7+/v7+
/v7+/////v7+/v7+/v7+/v7+/v7+/v7+/v7+/v7+/////v7+/v7+/v7+/v7+/v7+/v7+/v7+/v7+
/////v7+/v7+/v7+/v7+/v7+/v7+/v7+/v7+/////v7+/v7+/v7+/v7+/v7+/v7+/v7+/v7+////
/v7+/v7+/v7+/v7+/v7+/v7+/v7+/v7+/////v7+/v7+/v7+/v7+/v7+/v7+/v7+/v7+/////v7+
/v7+/v7+/v7+/v7+/v7+/v7+/v7+/////v7+/v7+/v7+/v7+/v7+/v7+/v7+/v7+/v7+/////v7+
/v7+/v7+/v7+/v7+/v7+/v7+/v7+/////v7+/v7+/v7+/v7+/v7+/v7+/v7+/v7+/////v7+/v7+
/v7+/v7+/v7+/v7+/v7+/v7+/v7+/////v7+/v7+/v7+/v7+/v7+/v7+/v7+/v7+/v7+/////v7+
/v7+/v7+/v7+/v7+/v7+/v7+/v7+/////v7+/v7+/v7+/v7+/v7+/v7+/v7+/v7+/v7+/v7+////
/v7+/v7+/v7+/v7+/v7+/v7+/v7+/v7+/v7+/v7+/////v7+/v7+/v7+////CP4AyQgcSLCgwYMI
EypcyLChw4cQI0qcSLGixYsYM2rcyLGjx48gQ4ocSbKkyZMoU6pcybKly5cwY8qcSbOmzZs4c+rc
ybOnz59AgwodSrSo0aNIkypdyrSp06dQo0qdSrWq1atYs2rdyrWr169gw4odS7as2bNo06pdy7at
27dw48qdS7eu3bt48+rdy7ev37+AAwseTLiw4cOIEytezLix48eQI0ueTLmy5cuYM2vezLmz58+g
Q4seTbq06dOoU6tezbq169ewY8ueTbu27du4c+vezbu379/AgwsfTry48ePIkytfzry58+fQo0uf
Tr269evYs2vfzr279+/gw/6LH0++vPnz6NOrX8++vfv38OPLn0+/vv37+PPr38+/v///AAYo4IAE
FmjggQgmqOCCDDbo4IMQRijhhBRWaOGFGGao4YYcdujhhyCGKOKIJJZo4okopqjiiiy26OKLMMYo
44w01mjjjTjmqOOOPPbo449ABinkkEQWaeSRSCap5JJMNunkk1BGKeWUVFZp5ZVYZqnlllx26eWX
YIYp5osJjKlhAmiWaeaEaapZJpprPghnQWqSMWecCN5JJ0F64gkgmgjUeZCgAvXpp36GIkToQIse
Wl8CCEDUaKGTOspemxJVSqml7yX6kKaMgsppd5heJCqjo5LnKUWnoprqd/6rTpRmpJ+2+upypWqk
p62b3jpdrLIaCuygvPr627CSAovsnsYil2tGy/Zaa7PEBdpRmqxmSiu1vGG7UaDFEhtRtNyq5u1G
5DaUbrjljpYuQ+d6VOy77XYWL0bglrQuu/Vadq+p1qa07bT9ivavqfzqGm7CBStGr0IHr7Rvw5g9
i1HEL01MsWQPQ8ywSfN+vDFeHStackoLj5yYxQiLLHHIKhN2skEY/6RxzHzly9HMNS3sMs5fAXot
zze9+zPQWhEd6tE63Yz0WpAybefAVjn9NFk1Z5r1VD5fLdbW40pdFL1iew2U0qGaZbTZWYFdK9pO
Wc123HDDzXWmc9Mttf7bZcmd91B12500zH8HBe7eZXvVdeE82c13XGszjpPjifdNuOQxPQ6v5ne9
GzDmLyPuGLuVgz7o59+W/pbRqpseuOB2sW66vIFvFvnsLQ/d+l6L4x622LAP5rfvJuu+u2DDE88y
wq2lTDyfwAf/WPKFc76Q9QZfLvnrujn/N/YJSW9771eDH76oGWQwm+xAm08ssg/E/wBtt29MOUTp
Z3BB/BsdIEIIlyFfu9xHMzQB4IAAcEj+0jc/ikzggQUJgQQnOEHIsI9aBCygQBCIwIYsMAMNlIgE
RjjChlAQgIypX6p0hq54cfCACyEBCciQvxBG5IE4lIBEKjiQCligAv6FWRjVDnW/g7wwgQiR4QwF
Er/8PQQEUMThA3VIEQmKgAIUiIAWgyhAM7FQI18cSAvGSIYXJnGJBHFA/NSoEChCcSATwOIUqUiR
CtjRjhQ4jArBlEE6TeoFLigIDM9okA/akCBuPEgOJzBC/4ngkf87IQ8JYoELXOCHEViZ1vj4ukbF
AAYviIgMD5IBDdSwIIlUSBwpMEWHTBCSArkABjDpsC5aqYgIiYFELjDKg5RAA6bMgAMIcgAQtBGK
WGQlIynySAtgMgIQWMwepdTHpSnEBjWICAQecEkLGKQEJaBh+obZEDcaUyByLGFFKunMCmQyhZuc
Ei4RcoMbkIEBC/7Ip0I62E0LPMCbAgHnRFJZkGVeRJaXdOfobHmk5VkEbCi4JwMmOlGEvBADGMXA
BaJJBoFG5I0dOedALKBRC3B0et5DEuVaZYITCISiFLUoBzM6y2iG86MiDWlOBWJSyjDUR9UUSBgZ
clMyqEAFC4ipQY5IUyAW1SEE/chOKxYsIc3zIWg06lGTqoCCkNGMFtCfRjEAkQOgcCRTDSDpgMo9
imTVBEetqEDG2IKBmJGGJPXnRCSAQ5CklarxtJFDK0LArD6VDC4IJEMigAH96RUic6RjSEFDtuM5
aKUbKepTQfmQjGbgsQ+RokE3Ysy/aoZsMAqqtDhy03DWgAa6hP5IRi+gvhuKFqQaAcFZQ0M6yxbI
bkPdiEvJkAIVCIQAMyAAVjHqTRPYdooTIIM5zVmREGygNKg9kWrttLsT2NO5BAjvApTbkBmi0bmh
[truncated: 3,640,582 more chars]
